# Supplementary material for: Exploring Information Exchange between Thesium chinense and Its Host Prunella vulgaris through Joint Transcriptomic and Metabolomic Analysis
Source: MDPI journal article supplement (doi:10.3390/plants13060804), 2024-03-12
Supplement: s1 [file s1]

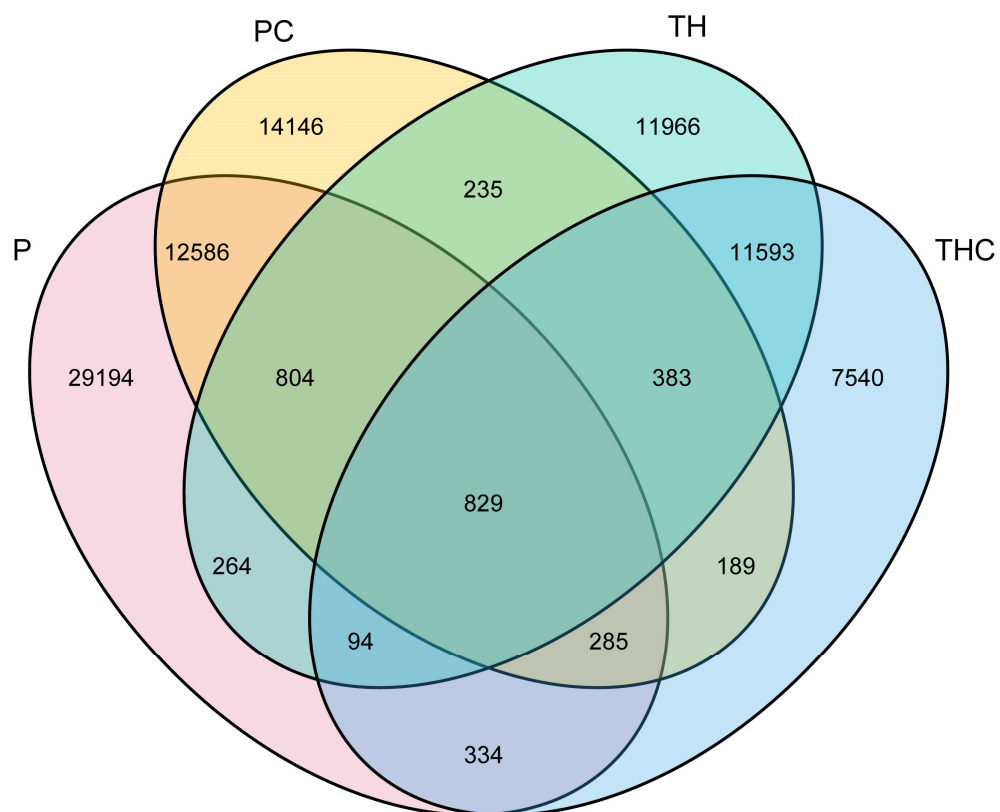

**Figure S1.** Venn diagrams showing common and unique sets of transcripts in *T. chinense* and its host *P. vulgaris* following parasitism.
