# Supplementary material for: Exploring Information Exchange between Thesium chinense and Its Host Prunella vulgaris through Joint Transcriptomic and Metabolomic Analysis
Source: Plants (Basel). 2024 Mar 12;13(6):804. doi: 10.3390/plants13060804 (PMC10975001; doi:10.3390/plants13060804)
Supplement: Supplementary file 1 [file plants-13-00804-s001.zip › plants-2859357-supplementary.xlsx]

## Sheet: Table S1
Table S1: Metabolites in the T. chinense, P. vulgaris and their chimeras.
Index	Formula	Compounds	Category	CAS	TH1	TH2	TH3	THC1	THC2	THC3	PC1	PC2	PC3	P1	P2	P3	cpd_ID	kegg_map
Lmtn003441	C15H20O7	2-Acetyl-3-hydroxyphenyl-1-O-glucoside	Phenolic acids	-	13079.2	8139.31	5758.34	1853.56	3022.42	6584.75	1.39007e+06	1.38514e+06	1.85422e+06	2.15305e+06	2.08863e+06	1.99753e+06	-	-
MWS80006	C18H32O4	9-Hydroperoxy-9Z,11E-Octadecadienoic Acid	Lipids	-	1.59159e+06	2.80897e+06	2.3114e+06	6.58745e+06	5.66752e+06	7.89917e+06	166287	190866	147397	149209	161378	112196	-	-
Hmln000659	C13H16O10	3-O-Galloyl-D-glucose	Phenolic acids	-	193137	735038	775772	39938.3	43307.9	46903.8	1.54257e+06	1.7801e+06	1.98534e+06	2.26847e+06	3.52148e+06	3.44859e+06	-	-
pmp001214	C16H24NO5+	Sinapine	Alkaloids	18696-26-9	59497	39620.8	55709	53765.3	15117.1	17416.1	99397.5	98107.4	79238.6	54489.8	122581	384785	C00933	ko00940,ko01110
Zmdp001663	C10H18N2O5S	γ-glutamylmethionine	Amino acids and derivatives	17663-87-5	1.00504e+06	5.08122e+06	2.14404e+06	360768	498487	1.02712e+06	1.63711e+06	1.06915e+06	1.29521e+06	364573	99316	575068	-	-
MWS3166	C18H35NO3	N-Palmitoylglycine	Amino acids and derivatives	2441-41-0	11136.6	9445.86	11857.9	14626.3	20095.4	19064.7	17123.2	14081.8	20091	15856.1	31135.8	26793	-	-
pmf0138	C6H12O6	D-Mannose	Others	3458-28-4	985475	1.78376e+06	1.20913e+06	1.13266e+06	1.1283e+06	959020	4.38764e+06	2.46216e+06	3.67944e+06	1.28858e+06	2.54065e+06	1.84027e+06	C00159	ko00051,ko00052,ko00520,ko01100,ko01250,ko02010
pmb2791	C18H30O4	9-Hydroperoxy-10E,12,15Z-octadecatrienoic acid	Lipids	111004-08-1	319159	263611	232852	313269	368268	458322	84662.5	104469	61886	43443.2	61800	58618.8	C16321	ko00592,ko01110
Zmdp002216	C11H20N2O5	L-γ-Glutamyl-L-leucine	Amino acids and derivatives	2566-39-4	1.96401e+06	4.05756e+06	2.5368e+06	1.33876e+06	1.64136e+06	2.44117e+06	9.46652e+06	7.4363e+06	9.6053e+06	3.04805e+06	4.58434e+06	4.07133e+06	-	-
pme2693	C6H14N2O	N-Acetylputrescine	Alkaloids	18233-70-0	1.536e+07	4.67369e+07	1.9229e+07	5.90933e+06	5.7946e+06	1.79732e+07	208795	152028	210884	133598	175422	175892	C02714	ko00330,ko01100
Zmyn000108	C6H10O8	D-Saccharic acid	Others	87-73-0	3.47685e+06	5.69354e+06	2.5455e+06	2.11174e+06	2.24132e+06	1.93539e+06	1.16355e+06	838536	1.22026e+06	565965	1.2679e+06	1.4245e+06	C00818	ko00053,ko01100
mws1377	C10H8N2	2,3'-Bipyridine	Alkaloids	581-50-0	121813	122968	124712	38662.5	55542.6	87699	193203	220625	276028	127216	138779	201279	-	-
pmn001708	C30H48O5	2,3,23-Trihydroxyurs-12-en-28-oic acid (Asiatic acid)	Terpenoids	464-92-6	4558.99	26008.4	31351	21070.8	32353.4	28690.6	1.52353e+06	1.7068e+06	2.04821e+06	1.36423e+06	1.83764e+06	1.97796e+06	C08617	-
Lmbp000123	C6H13NO2S	L-Homomethionine	Amino acids and derivatives	25148-30-5	916193	877944	596683	713581	357494	186141	605985	224392	503413	125048	647389	666425	C17213	ko00966,ko01110,ko01210
mws1350	C9H10O4	Syringaldehyde; 4-Hydroxy-3,5-Dimethoxybenzaldehyde	Phenolic acids	134-96-3	471522	166011	250935	161554	166913	182501	2.26939e+06	2.93264e+06	2.18632e+06	4.05382e+06	1.32066e+06	1.10463e+06	-	-
pmn001384	C25H24O12	Isochlorogenic acid C	Phenolic acids	57378-72-0	126278	150313	266354	97365	114415	98596.1	369637	436368	306977	260841	271144	301522	-	-
Li512115	C25H24O12	Isochlorogenic acid B	Phenolic acids	14534-61-3	126278	150313	266354	97365	114415	98596.1	369637	436368	306977	260841	271144	301522	C10468	-
Lmhp007840	C27H52NO7P	LysoPC 19:2	Lipids	-	12680.7	36088.6	36462.9	19730.5	39500.5	37317.3	1.35862e+06	883635	992265	408371	1.00721e+06	927624	-	-
MWSmce295	C9H12N2O6	1-beta-D-Arabinofuranosyluracil	Nucleotides and derivatives	3083-77-0	166855	280019	246277	20280.2	207935	116603	356726	431280	410314	246913	639785	600280	C16908	-
Zbdn001947	C13H18O8	Isotachioside	Phenolic acids	31427-08-4	329265	702498	1.08205e+06	56479	69886.6	91196.9	779012	769994	933409	1.64671e+06	1.80967e+06	1.70205e+06	-	-
Zmpn000199	C6H10O8	D-Galactaric acid	Others	526-99-8	3.01745e+06	4.35509e+06	2.36104e+06	1.61558e+06	1.65286e+06	1.4674e+06	672398	564835	787902	384506	796693	870415	C00879	ko00053,ko01100
MWS20987	C7H15N3O2	N5-(1-Iminoethyl)-L-ornithine	Amino acids and derivatives	36889-13-1	96120.9	57068.2	95720.4	91892.9	86936.6	80176.3	80229.3	74114.7	77102.5	65847.4	54661.4	74969.4	-	-
pmb0764	C6H9NOS	4-Methyl-5-thiazoleethanol	Others	137-00-8	122277	109654	99768.3	104725	55104.1	63469.1	183562	234176	375266	389047	401297	483074	C04294	ko00730,ko01100,ko01240
mws0214	C6H14O6	D-Sorbitol	Others	50-70-4	3.253e+06	2.35754e+06	5.34093e+06	3.7128e+06	3.11672e+06	3.78737e+06	11989.6	34165.7	20129.8	4845.4	3980.9	5295.22	C00794	ko00051,ko00052,ko01100,ko02010
Hmln002355	C27H34O12	5'-Methoxymatairesinoside	Lignans and Coumarins	1691201-82-7	27664	125463	27936.2	64976.3	60666.8	90931.1	2.18982e+06	1.57894e+06	3.73342e+06	1.18349e+06	632205	575854	-	-
Rfmb091	C18H32O3	9S-Hydroxy-10E,12Z-octadecadienoic acid	Lipids	15514-85-9	6.20936e+06	6.51349e+06	7.16906e+06	9.80573e+06	1.04795e+07	1.02028e+07	349782	415109	298931	139616	199625	161605	C14767	ko00591
MWS201411	C10H20N4O4	Lys-Asn	Amino acids and derivatives	19908-06-6	91949.4	85776.9	76378.8	93888.4	111671	104806	52814.2	63077.2	48323.9	60920.9	45491.3	66479.2	-	-
Zmgn002106	C11H13NO3	N-Acetyl-L-phenylalanine	Amino acids and derivatives	2018-61-3	1.60683e+06	5.75025e+06	1.96456e+06	1.45229e+06	1.35159e+06	1.68345e+06	178099	196962	231668	130993	228364	200199	C03519	ko00360,ko01100
mws0126	C26H54NO7P	LysoPC 18:0	Lipids	19420-57-6	3.92597e+06	2.69326e+06	3.62215e+06	2.43236e+06	2.08427e+06	2.64416e+06	2.93258e+07	3.13296e+07	3.15731e+07	1.03844e+07	1.9909e+07	2.26695e+07	-	-
Lmgn000224	C5H6O5	2-Methyl-3-oxosuccinic acid	Organic acids	-	2.275e+06	420409	813793	692089	700294	641012	89386.5	192625	331898	73233	89224.6	62855.4	C06030	ko00660
mws1050	C5H9NO4	O-Acetylserine	Amino acids and derivatives	5147-00-2	547552	579470	623277	726449	805775	644196	756909	499976	658601	394118	574038	552100	C00979	ko00270,ko00908,ko00920,ko01100,ko01110,ko01200,ko01230,ko04122
pmb0818	C11H11NO3	Methoxyindoleacetic acid	Alkaloids	3471-31-6	6.42897e+06	4.55816e+06	3.4273e+06	2.04053e+06	1.59237e+06	1.80649e+06	1.01766e+07	7.14228e+06	7.99654e+06	2.46646e+06	4.1999e+06	4.28663e+06	C05660	ko00380
pmf0139	C6H12O6	D-Galactose	Others	59-23-4	1.41274e+06	2.58963e+06	1.08435e+06	1.28705e+06	1.88936e+06	1.72437e+06	5.80832e+06	2.15765e+06	5.14941e+06	2.15061e+06	3.87989e+06	3.71824e+06	C00124	ko00052,ko01100
pmb2804	C18H32O4	13S-Hydroperoxy-9Z,11E-octadecadienoic acid	Lipids	33964-75-9	106421	201826	162102	184047	352378	208117	2.82819e+06	6.26192e+06	2.90654e+06	1.03299e+06	1.05489e+06	932988	C04717	ko00591,ko01100
mws1013	C9H6O4	Esculetin (6,7-Dihydroxycoumarin)	Lignans and Coumarins	305-01-1	101095	100001	250842	76724	77158	92762	2.1397e+07	2.00314e+07	2.52256e+07	2.54867e+07	2.31672e+07	2.39844e+07	C09263	ko00999,ko01110
Li512111	C24H24O13	Isorhamnetin-3-O-(6''-acetylglucoside)	Flavonoids	-	132611	1.12042e+06	261649	69190.9	65570.3	69255.2	61984.4	97249.2	71421.2	68916.4	48368.3	37414.8	-	-
MWS2442	C6H13O9P	D-Fructose 6-Phosphate	Others	643-13-0	2.47785e+06	3.83158e+06	3.02383e+06	9.41672e+06	8.98164e+06	9.53781e+06	3.06415e+06	3.44294e+06	3.43348e+06	1.35195e+06	2.35481e+06	2.09052e+06	C00085	ko00052,ko00500,ko00710,ko01100,ko01110,ko01200
ML10171848	C5H8O5	D-Arabinono-1,4-lactone	Others	2782-09-4	633581	934715	764304	1.29141e+06	1.20652e+06	1.06056e+06	775954	568191	792589	262996	758802	796679	C00652	ko00053,ko01100
pme0021	C9H11NO2	L-Phenylalanine	Amino acids and derivatives	63-91-2	5.99877e+06	4.78749e+06	4.79262e+06	4.76589e+06	3.97147e+06	4.44569e+06	3.99032e+06	2.88906e+06	3.9297e+06	877128	4.04952e+06	4.50541e+06	C00079	ko00360,ko00400,ko00460,ko00470,ko00940,ko00960,ko00966,ko00970,ko00999,ko01100,ko01110,ko01210,ko01230,ko02010
mws4053	C30H48O3	3-Hydroxyurs-12-en-28-oic acid (Ursolic acid)	Terpenoids	77-52-1	15437.3	253106	97159.4	67722.1	61809.1	76422.2	9.90485e+06	9.44278e+06	1.0148e+07	9.44164e+06	1.35573e+07	1.25296e+07	C08988	-
MWSslk097	C10H10O4	Dimethyl phthalate	Phenolic acids	131-11-3	4.52519e+06	3.52667e+06	3.1684e+06	3.32486e+06	3.57326e+06	3.45642e+06	4.00004e+06	3.82017e+06	4.88962e+06	3.98408e+06	4.19869e+06	3.58364e+06	C11233	-
mws1489	C18H36O2	Stearic Acid	Lipids	57-11-4	3.36718e+06	1.85488e+06	2.74458e+06	2.34897e+06	2.48654e+06	2.41611e+06	4.33683e+06	3.09814e+06	3.12385e+06	2.37078e+06	1.59856e+06	1.85611e+06	C01530	ko00061,ko01040,ko01100
MWSHY0140	C16H12O4	3-Hydroxy-3'-methoxyflavone	Flavonoids	76666-32-5	6968.92	8726.97	2998.29	14054.2	3886.75	2493.38	136657	119125	140497	212712	402317	530874	-	-
pme2117	C10H15N5O10P2	Adenosine 5'-diphosphate	Nucleotides and derivatives	58-64-0	1.75766e+06	1.54472e+06	2.20678e+06	1.46685e+06	1.89515e+06	1.453e+06	299176	267272	227417	210485	242318	276482	C00008	ko00190,ko00195,ko00230,ko00908,ko01100,ko01110,ko01232,ko01240
MWSmce119	C6H14N4O2	L-Arginine	Amino acids and derivatives	74-79-3	1.24374e+07	9.67044e+06	9.86273e+06	1.02763e+07	5.74769e+06	8.61073e+06	1.08761e+08	5.52671e+07	7.3912e+07	8.61608e+06	4.79706e+07	4.37762e+07	C00062	ko00220,ko00261,ko00330,ko00470,ko00970,ko01100,ko01110,ko01230,ko02010
Cmpp007319	C15H16O4	7-Methoxy-5-Prenyloxycoumarin	Lignans and Coumarins	35590-41-1	55600.2	17429	29730.5	6311.03	16941.1	16778	34020.9	52738.5	61480.9	52310.7	37745.5	72360.7	-	-
Hmhn007023	C30H48O6	2,3,19-Trihydroxyurs-12-en-28-oic acid	Terpenoids	-	10899.4	12158.1	43526.8	44285.1	84863.3	64467.3	8.23689e+06	7.2411e+06	6.45594e+06	2.59919e+06	2.60644e+06	2.81424e+06	-	-
mws4170	C6H12O6	D-Glucose	Others	50-99-7	1.32208e+06	1.74993e+06	1.22939e+06	1.29176e+06	1.11706e+06	1.06087e+06	4.00182e+06	2.36548e+06	3.45333e+06	1.40367e+06	2.48113e+06	2.36279e+06	C00031	ko00010,ko00030,ko00052,ko00500,ko00520,ko00901,ko01100,ko01110,ko02010
MWSmce608	C6H13NO3	4-Hydroxy-L-Isoleucine	Amino acids and derivatives	781658-23-9	257518	283102	277642	209513	152816	245933	373114	241758	300666	205753	192202	239413	-	-
Jmwn002117	C14H20O9	2-(3,4-dihydroxyphenyl)ethanediol 1-O-β-D-glucopyranoside	Phenolic acids	-	409611	610412	354212	97255.6	129444	125757	1.55455e+07	1.50451e+07	1.37217e+07	17080645	1.42826e+07	1.25776e+07	-	-
pmb0889	C18H30O2	Punicic acid (9Z,11E,13Z-octadecatrienoic acid)	Lipids	544-72-9	5.05439e+06	5.2947e+06	5.81543e+06	7.62702e+06	8.4835e+06	8.9292e+06	2.02199e+06	3.0292e+06	2.27856e+06	805351	744893	667469	C08364	-
mws0250	C9H11NO3	L-Tyrosine	Amino acids and derivatives	60-18-4	1.24423e+07	7.08694e+06	7.21052e+06	3.89781e+06	3.00589e+06	4.31266e+06	5.99716e+06	3.8314e+06	6.08107e+06	2.2478e+06	6.6812e+06	6.31939e+06	C00082	ko00130,ko00261,ko00350,ko00360,ko00400,ko00460,ko00730,ko00940,ko00950,ko00965,ko00966,ko00970,ko00999,ko01100,ko01110,ko01210,ko01230,ko01240
HJN086	C21H22O11	Eriodictyol-3'-O-glucoside	Flavonoids	-	22969.9	12052.3	22182.3	23352.5	5362.46	12241	232606	122583	420481	265154	209801	198759	-	-
Lmfn004235	C18H16O8	Myricetin-3,7,3'-trimethyl ether	Flavonoids	-	62237.1	5402.45	187292	9170.82	5171.17	6769.16	6.491e+06	6.10329e+06	7.77043e+06	7.42477e+06	8.97187e+06	8.90246e+06	-	-
Lmyn012771	C30H46O3	3-Oxoolean-18-en-28-oic acid (Moronic acid)	Terpenoids	6713-27-5	57877.7	388207	44845.9	33861.9	33887.3	31083.8	2.01068e+07	1.72613e+07	1.63684e+07	1.44555e+07	1.52222e+07	1.68521e+07	-	-
mws0219	C4H7NO4	L-Aspartic Acid	Amino acids and derivatives	56-84-8	4.52727e+06	3.96333e+06	3.10586e+06	3.21915e+06	3.00303e+06	3.41628e+06	3.59167e+06	2.32537e+06	2.21662e+06	1.20922e+06	1.66089e+06	1.77561e+06	C00049	ko00220,ko00250,ko00260,ko00261,ko00270,ko00300,ko00340,ko00410,ko00460,ko00470,ko00710,ko00760,ko00770,ko00970,ko00999,ko01100,ko01110,ko01200,ko01210,ko01230,ko01240,ko02010
pmn001691	C18H32O5	9,12,13-Trihydroxy-10,15-octadecadienoic acid	Lipids	-	39041.8	74380.7	80701.8	81368.5	132659	94978.3	46856.9	84077.4	37279.1	36287.4	35176.5	34711.5	-	-
pmb0501	C5H14N4	Agmatine	Alkaloids	306-60-5	1.51236e+07	4.86168e+07	2.11933e+07	6.18427e+06	5.29168e+06	1.7666e+07	151327	144025	179528	117395	202685	202819	C00179	ko00330,ko01100
MWSmce096	C15H22O	Nootkatone	Terpenoids	4674-50-4	197300	288826	314937	180926	165604	234965	338027	349710	418582	270226	349983	356799	C17914	-
mws0248	C9H12N2O6	Uridine	Nucleotides and derivatives	58-96-8	1.67268e+06	1.06673e+06	1.87025e+06	889609	1.32109e+06	1.04344e+06	2.34678e+06	2.0113e+06	1.44912e+06	1.39426e+06	1.47017e+06	1.66241e+06	C00299	ko00240,ko01100,ko01232,ko02010
Lmsn010896	C30H46O6	23-Formyl-2,3,19-trihydroxyurs-12-en-28-oic acid (Pinfaensic acid)	Terpenoids	-	2744.32	1666.82	3171.28	4581.62	8884.7	18348.8	4.49924e+06	3.39275e+06	1.58445e+06	1.20628e+06	402910	504983	-	-
pme2596	C8H9NO4	4-Pyridoxic acid	Others	82-82-6	176701	316810	155244	114239	81864.4	85657	2.64835e+06	1.63319e+06	2.01004e+06	1.32222e+06	1.89618e+06	2.09793e+06	C00847	ko00750,ko01100
mws1346	C6H11NO4	DL-2-Aminoadipic acid	Alkaloids	542-32-5	513151	1.68303e+06	984907	624532	499829	489782	602824	694395	658181	345631	664515	697309	C00956	ko00300,ko00310,ko01100,ko01110,ko01210,ko01230
pmn001368	C32H44O17	Olivil-4,4'-Di-O-glucoside	Lignans and Coumarins	-	90882.2	109554	90529.3	41723.5	45169.8	38965.6	204954	133545	319082	209697	696759	214077	-	-
mws0704	C2H8NO4P	O-Phosphorylethanolamine	Alkaloids	1071-23-4	213424	165195	126220	74834	91062.5	117797	32909.6	40562.6	27601.9	27727	27685.5	16404.5	C00346	ko00563,ko00564,ko00600,ko01100
Lmhp001430	C10H14N2O4	Cyclo(Pro-Glu)	Amino acids and derivatives	-	3.9536e+06	5.64392e+06	3.02135e+06	2.38422e+06	2.27403e+06	2.1893e+06	685948	614429	841278	478350	1.03409e+06	1.148e+06	-	-
mws0001	C4H8N2O3	L-Asparagine	Amino acids and derivatives	70-47-3	8.36917e+06	6.12109e+06	8.56666e+06	6.62488e+06	4.68342e+06	6.07083e+06	1.3241e+07	1.02946e+07	8.81734e+06	2.46283e+06	2.33836e+06	2.10342e+06	C00152	ko00250,ko00460,ko00970,ko01100,ko01110,ko01230
Lmmn001643	C9H8O3	2-Hydroxycinnamic acid	Phenolic acids	583-17-5	998011	442319	1.55716e+06	2.08875e+06	2.43596e+06	2.12812e+06	2.62627e+06	3.02532e+06	3.62102e+06	3.45912e+06	4.29552e+06	5.18801e+06	C01772	ko00360,ko00999,ko01100,ko01110
Lmbn002648	C9H8O3	α-Hydroxycinnamic Acid	Phenolic acids	5801-57-0	998011	442319	1.55716e+06	2.08875e+06	2.43596e+06	2.12812e+06	2.62627e+06	3.02532e+06	3.62102e+06	3.45912e+06	4.29552e+06	5.18801e+06	C02763	ko00360,ko01100
Wmyn000217	C14H20O9	2,6-dimethoxy-hydroquinone-4-O-β-D-glucopyranoside	Phenolic acids	-	260685	1.08042e+06	862259	40211.5	105015	34696.2	2.41423e+06	3.45257e+06	2.38077e+06	3.5826e+06	4.1483e+06	2.79589e+06	-	-
MWSmce220	C6H10O6	D-Glucono-1,5-lactone	Others	90-80-2	164074	335375	449728	312731	221463	228799	247798	229437	541953	815266	850461	703785	C00198	ko00030,ko01100,ko01110,ko01200
mws0917	C17H14O7	3,7-Di-O-methylquercetin	Flavonoids	2068-02-2	16926.6	9181.96	14947.6	9402.1	9426.46	7326.97	96048	116587	109565	82594.4	82625.8	63015.7	C01265	ko00944,ko01110
Hmgn002833	C20H20O7	4-Ketopinoresinol	Lignans and Coumarins	-	197357	152658	90837.4	176436	151681	133735	61412.7	104750	90138.1	89205.5	66046.9	61369.7	-	-
Zmyn000247	C5H8O5	2-Hydroxyglutaric Acid	Organic acids	13095-48-2	978618	1.22215e+06	1.28856e+06	1.69953e+06	1.62057e+06	1.48529e+06	892938	504779	873798	314568	827688	898504	C03196	ko00310,ko01100
Lmgn002184	C7H10O5	2-Oxoheptanedionic acid	Organic acids	17126-90-8	170041	542643	30971	7608.07	19979.6	17693.4	43597.5	42480.6	89012	28739.1	41947.5	42788.1	C16588	ko01100,ko01210,ko01240
pmb0964	C16H23N5O5	Isopentenyladenine-7-N-glucoside	Nucleotides and derivatives	-	2.69798e+06	4.79469e+06	4.68794e+06	1.8976e+06	3.6249e+06	3.71981e+06	5.61012e+06	4.59014e+06	6.59298e+06	2.13643e+06	5.72903e+06	5.54475e+06	-	-
mws0236	C2H7NO3S	2-Aminoethanesulfonic acid	Organic acids	107-35-7	49352.6	84569.3	65019.9	28726.3	29822.9	28296.7	136607	128042	63803.3	33434.1	35672.3	20696.7	C00245	ko00430,ko00920,ko01100,ko02010
MWSmce083	C11H12O4	Ferulic acid methyl ester	Phenolic acids	2309-07-1	584213	938416	682893	694275	492755	712815	5.67299e+06	5.54757e+06	3.41518e+06	1.41118e+06	1.73864e+06	1.02478e+06	-	-
pmn001694	C18H34O5	9,10,13-Trihydroxy-11-Octadecenoic Acid	Lipids	29907-57-1	194918	395760	284160	221841	366244	282842	1.00966e+06	1.42915e+06	531737	559850	521750	294724	C14835	ko00591
Jmwn002172	C14H20O8	3,4-dihydroxyphenylethanol-β-D-glucopyranoside	Phenolic acids	-	126600	601343	218312	42234.7	70529	49534	1.87872e+06	2.57706e+06	2.16285e+06	2.5832e+06	2.42887e+06	2.61256e+06	-	-
Lmjn005433	C19H18O8	Rosmarinic acid methyl ester	Phenolic acids	99353-00-1	2134.09	9	23923.9	9	9	9	4.79433e+06	3.6236e+06	6.18088e+06	4.43534e+06	7.72687e+06	8.15485e+06	-	-
Lmqp002761	C19H20O4	Alnusonol	Phenolic acids	52330-12-8	68403.6	51629.5	25330.6	27200.8	22943.8	31737.5	2.49404e+07	1.95294e+07	1.25592e+07	1.33363e+07	9.43168e+06	8.52216e+06	-	-
Hmqp001042	C10H20O6	Butyl beta-D-glucoside	Others	5391-18-4	12934.9	24239.7	27181.1	24861.8	6394.52	15238.8	134465	147400	92536.8	136472	74093.2	61267.3	-	-
Lmfn004093	C21H24O10	Phloretin-4'-O-glucoside (Trilobatin)	Flavonoids	4192-90-9	26048.8	25532.3	3306.32	3531.5	7342.21	13096.8	2.91864e+06	2.51457e+06	1.29549e+06	1.5099e+06	1.71665e+06	1.34703e+06	-	-
Zmgn004439	C10H20O2	Decanoic acid	Organic acids	334-48-5	4735.89	8381.56	9951.66	11891	5958.21	5486.91	39352.7	50558.8	45207.5	30481.1	41681.7	45475.4	C01571	ko00061,ko01100
MWSslk132	C16H30O4	Hexadecanedioic acid	Lipids	505-54-4	6.50811e+06	8.1213e+06	7.03096e+06	2.54404e+07	2.48535e+07	3.11269e+07	186956	233790	214792	190847	186206	132158	C19615	ko00073,ko01100
MWS1830	C9H10O3	Ethylsalicylate	Phenolic acids	118-61-6	9	9	9	23310	53013.9	29869.9	374594	571516	556739	565727	596471	464439	-	-
mws1429	C13H20O3	Vomifoliol	Terpenoids	189351-15-3	15794.2	33958.5	54937.6	11672.3	40856	29876.8	108634	92541.5	121099	81067.5	95005.5	100405	C04166	-
MWS201403	C9H19N3O3	Lys-Ala	Amino acids and derivatives	17043-71-9	928765	1.16311e+06	1.25753e+06	1.05784e+06	1.15635e+06	1.14261e+06	1.31632e+06	1.25072e+06	1.25991e+06	1.28655e+06	1.36598e+06	1.32876e+06	-	-
pme3034	C5H8O4	Ethylmalonic acid	Organic acids	601-75-2	49727.1	9	53839.5	76787.3	73535.7	63982.9	123751	73593.7	101507	71733.8	234415	322282	-	-
pme0274	C6H13NO2	6-Aminocaproic acid	Organic acids	60-32-2	860222	631817	614236	252482	195726	275413	615743	354224	518860	165818	587460	845540	C02378	ko01100
MWS5206	C9H10O4	4-Hydroxyphenyllactic Acid	Phenolic acids	306-23-0	107126	134880	87424	51323.1	88202.7	105767	295483	529766	569129	693986	307113	1.031e+06	C03672	-
mws1329	C21H20O12	Quercetin-7-O-glucoside	Flavonoids	491-50-9	26965.5	5.06878e+06	150966	36945	12557.4	32844.9	127664	112493	126963	217847	230331	137811	C12639	-
MWSmce461	C4H7NO2	L-Azetidine-2-carboxylic acid	Alkaloids	2133-34-8	908003	1.25848e+06	1.13292e+06	1.1025e+06	983505	1.05592e+06	2.20148e+06	1.99147e+06	1.55154e+06	597066	863739	1.86788e+06	-	-
pmb0862	C20H42NO7P	LysoPC 12:0	Lipids	20559-18-6	6122.82	4976.36	10337.9	9673.35	11550	7048.39	34354.6	47185.9	48241.2	25558.3	67095.2	110056	-	-
Lmqn000780	C17H27N3O17P2	Uridine 5'-diphospho-N-acetylglucosamine	Nucleotides and derivatives	528-04-1	8.69024e+06	5.93748e+06	7.06848e+06	3.60904e+06	3.6813e+06	3.55938e+06	1.02219e+06	1.36974e+06	971926	706927	871155	1.10557e+06	C00043	ko00520,ko01100,ko01250
MWS20672	C17H23N3O6	Glu-Phe-Ala	Amino acids and derivatives	-	194886	340706	1.2138e+06	1.4837e+06	1.06678e+06	1.09447e+06	31714.6	29132.3	6528.68	16475.5	10658.2	34530.7	-	-
mws0180	C7H6O4	2,5-Dihydroxybenzoic acid; Gentisic Acid	Phenolic acids	490-79-9	151277	86238.6	120226	114548	81446.7	86224.1	2.67518e+06	2.92054e+06	3.05497e+06	5.84673e+06	1.00432e+07	8.65387e+06	C00628	ko00350,ko01100
mws0183	C7H6O4	3,4-Dihydroxybenzoic acid (Protocatechuic acid)	Phenolic acids	99-50-3	329792	165081	258460	249939	244066	232516	5.96524e+06	6.56668e+06	6.76944e+06	1.24521e+07	2.32507e+07	1.97188e+07	C00230	ko01100,ko01110
pme0008	C6H13N3O3	L-Citrulline	Amino acids and derivatives	372-75-8	179238	207323	222323	230837	210484	173939	1.49834e+06	942515	1.08806e+06	202290	500526	458386	C00327	ko00220,ko01100,ko01110,ko01230
pme0066	C3H7N3O2	Guanidinoacetate	Alkaloids	352-97-6	68143.8	123106	84119.5	30890.3	39127.7	43740.4	54838.9	50964.2	48151.3	40714	44417.3	41569.3	C00581	ko00260,ko00330,ko01100
MWSslk011	C11H8O3	2-Methoxy-1,4-naphthoquinone	Quinones	2348-82-5	82601	73246.4	24930.1	23422.2	14226.7	22112.5	338430	429963	334412	211502	272918	206947	-	-
pmb2640	C12H24O2	Dodecanoic acid (Lauric acid)	Lipids	143-07-7	305055	289874	308502	308296	299796	296100	927780	1.10788e+06	1.0941e+06	701259	1.33118e+06	1.3845e+06	C02679	ko00061,ko01100,ko01110
Lmyn000160	C8H14O8	Mucic acid Dimethyl Ester	Phenolic acids	-	2.11479e+06	1.0683e+06	790163	2.70331e+06	2.38145e+06	2.33069e+06	1.10917e+06	726052	2.21806e+06	1.18952e+06	2.60803e+06	1.76063e+06	-	-
pme3083	C8H7NO3	2-(Formylamino)benzoic acid	Phenolic acids	3342-77-6	157498	73201.9	265075	347643	334289	329017	521766	589838	761784	643494	999099	1.06933e+06	C05653	ko00380,ko01100
mws1587	C6H13NO2	L-Norleucine	Amino acids and derivatives	327-57-1	2.77651e+06	1.85411e+06	1.80607e+06	1.01011e+06	695519	790271	1.95655e+06	1.18605e+06	1.80752e+06	474763	1.89269e+06	2.41863e+06	C01933	-
pme2527	C5H12N2O2	L-Ornithine	Amino acids and derivatives	70-26-8	690495	756447	964624	556879	417356	569021	1.31111e+06	958400	832490	192389	185208	168998	C00077	ko00220,ko00330,ko00470,ko00480,ko01100,ko01110,ko01210,ko01230,ko02010
mws0983	C20H39NO2	N-Oleoylethanolamine	Alkaloids	111-58-0	1.18872e+06	971124	1.21132e+06	1.82228e+06	1.92197e+06	1.917e+06	175309	195184	279689	22565.7	24887.9	29139.2	C20792	-
pme2244	C11H11NO2	3-Indolepropionic acid	Alkaloids	830-96-6	790405	571134	358912	201265	170077	193659	1.3003e+06	881056	924740	268196	425594	480640	-	-
pmb0801	C14H19NO9	4-Pyridoxic acid-O-glucoside	Others	-	68219.2	357594	82787.7	49172.6	47289.4	20991.4	487856	471984	433387	409407	449387	356379	-	-
Lmhp009034	C21H42NO7P	LysoPE 16:1	Lipids	-	800592	4.8997e+06	3.94714e+06	2.15053e+06	1.46196e+06	4.18325e+06	1.19634e+07	6.15046e+06	1.24252e+07	8.60495e+06	2.47848e+07	1.81442e+07	-	-
Lmhp010908	C27H54NO7P	LysoPC 19:1	Lipids	-	725774	2.93661e+06	2.00862e+06	1.16024e+06	1.39281e+06	1.65138e+06	2.14263e+07	1.06213e+07	1.46098e+07	5.74149e+06	9.85284e+06	8.57388e+06	-	-
Zmjp000624	C8H9NO3	Pyridoxal	Others	66-72-8	833195	907537	1.08984e+06	873551	819970	802531	524914	513561	763307	308138	668970	799570	C00250	ko00750,ko01100,ko01240
Wbmp003302	C10H12O2	Frambinone	Others	-	2.02321e+06	941716	1.46726e+06	612810	745029	1.57333e+06	7.82773e+06	7.32413e+06	7.28202e+06	1.20687e+07	1.25291e+07	1.18496e+07	-	-
Lmdn001560	C15H22O9	6-DeoxyCatalpol	Terpenoids	99499-99-7	42322.9	82745.8	62101.2	53700.9	55900.2	61254.6	183331	279970	274424	277495	355183	366838	-	-
Zmjp000966	C10H13N5O4	Vidarabine	Nucleotides and derivatives	5536-17-4	1.00015e+07	4.05317e+06	6.33997e+06	3.46303e+06	5.54573e+06	4.80971e+06	6.37611e+06	6.09636e+06	5.58175e+06	3.00669e+06	4.40297e+06	7.07569e+06	-	-
MWS4525	C6H7N5O	6-O-methylguanine	Nucleotides and derivatives	20535-83-5	3.611e+06	3.0753e+06	1.79961e+06	1.24397e+06	812890	775146	1.05561e+06	887311	1.33985e+06	646306	643297	910358	-	-
MWSmce338	C6H11NO3	N-Hydroxypipecolic acid	Alkaloids	115819-92-6	130666	136440	128209	131588	128773	143691	239504	181055	219267	75757	223442	397379	-	-
MWS2430	C15H30O2	13-methylmyristic acid	Lipids	2485-71-4	947376	5.69183e+06	5.03781e+06	8.27226e+06	4.17379e+06	5.94283e+06	5.01404e+06	3.7686e+06	4.19678e+06	729585	2.98522e+06	4.29406e+06	-	-
pma2987	C6H11N3O	Histidinol	Alkaloids	501-28-0	3.24443e+07	4.00279e+07	4.05467e+07	3.99668e+07	4.0802e+07	4.22257e+07	4.42579e+07	4.2375e+07	4.49941e+07	4.41825e+07	5.00033e+07	4.94348e+07	C00860	ko00340,ko01100,ko01110,ko01230
Hmcn000192	C7H14O7	Sedoheptulose	Others	3019-74-7	858865	1.46218e+06	729475	552109	568052	524186	341743	331894	306251	232528	567808	584514	C02076	ko00710,ko01100
MWSmce025	C16H18O10	Fraxetin-8-O-glucoside (Fraxin)	Lignans and Coumarins	524-30-1	32678.3	180908	28406.8	27978.8	38213.2	24542.2	5.02203e+06	5.1139e+06	5.50961e+06	2.24815e+06	1.75967e+06	1.07767e+06	C09266	-
mws0154	C7H10O5	Shikimic acid	Organic acids	138-59-0	254628	267045	221902	131004	150679	148707	102043	110596	95802.5	55137.7	90960.3	112685	C00493	ko00400,ko00999,ko01100,ko01110,ko01230,ko01240
pmb0789	C14H21NO8	Pyridoxine-5'-O-glucoside	Others	-	1.77722e+06	2.882e+06	2.68615e+06	2.00172e+06	1.58283e+06	1.72667e+06	3.18941e+06	2.3824e+06	3.54166e+06	1.3524e+06	4.07317e+06	4.29086e+06	C03996	-
MWSslk133	C14H26O4	1,14-Tetradecanedioic Acid	Lipids	821-38-5	125266	122609	120021	132692	184329	165331	78573.1	87862.8	100703	86777.7	100695	84209.6	-	-
MWS3036	C5H8O5	3-Hydroxyglutaric acid	Organic acids	638-18-6	490986	733584	655868	985942	906138	864460	669933	497551	652865	288742	580570	599952	-	-
Lmbn001467	C7H13NO3	5-Acetamidopentanoic Acid	Organic acids	1072-10-2	8.73707e+06	8.07353e+06	3.72407e+06	3.75813e+06	3.97175e+06	3.69681e+06	236723	217815	244685	141261	332630	353630	C03087	ko00310,ko01100
Hmpp002612	C27H30O16	Luteolin-7-O-gentiobioside	Flavonoids	-	677870	786337	800936	335378	308732	383176	10651.1	20453.6	63874.4	7123.58	11339.8	18924.5	-	-
Lmqp000427	C6H11NO3	N-Methyl-Trans-4-Hydroxy-L-Proline	Amino acids and derivatives	4252-82-8	830035	1.54349e+06	800160	648424	210410	197025	340196	301816	429466	426568	837708	2.45332e+06	-	-
Lmrj001698	C9H18N2O4	L-Seryl-L-Isoleucine	Amino acids and derivatives	91086-51-0	728790	375906	636628	1.04246e+06	1.17875e+06	1.09428e+06	164529	191460	150120	92309.3	152233	144634	-	-
MWS04555g	C6H13NO2	D-Allo-Isoleucine	Amino acids and derivatives	1509-35-9	2.56032e+06	3.18979e+06	1.73977e+06	964467	680162	942009	2.04667e+06	1.02924e+06	1.82537e+06	466784	1.84267e+06	2.3716e+06	-	-
MWS201465	C14H18N2O5	Glu-Phe	Amino acids and derivatives	20556-22-3	754038	839269	1.09071e+06	1.54024e+06	1.64862e+06	1.38054e+06	358894	307953	326070	107383	236287	241583	-	-
MWS04559g	C9H11NO3	3-Hydroxy-L-phenylalanine	Amino acids and derivatives	587-33-7	1.11422e+07	6.42585e+06	6.52006e+06	3.66118e+06	2.92447e+06	4.181e+06	5.25105e+06	3.60852e+06	5.51824e+06	2.2369e+06	5.59505e+06	5.90951e+06	-	-
pmb2922	C15H24N2O17P2	Uridine 5'-diphospho-D-glucose	Nucleotides and derivatives	133-89-1	1.16246e+07	1.87058e+07	2.17772e+07	1.45769e+07	1.49464e+07	1.53933e+07	8.18069e+06	9.34793e+06	6.50761e+06	4.48818e+06	4.21955e+06	4.18451e+06	C00029	ko00040,ko00052,ko00053,ko00500,ko00520,ko00561,ko00908,ko01100,ko01110,ko01240,ko01250
Hmhp001812	C11H15N5O4	2'-O-Methyladenosine	Nucleotides and derivatives	2140-79-6	650119	556217	668933	679492	597696	420887	1.50757e+06	940380	858272	538464	892838	1.19194e+06	-	-
Zmzn003953	C18H30O4	13(s)-hydroperoxy-(9z,11e,15z)-octadecatrienoic acid	Lipids	67597-26-6	2.78241e+06	5.32477e+06	5.59965e+06	7.26016e+06	4.20042e+06	4.89688e+06	6.09123e+06	5.09875e+06	5.15877e+06	5.16872e+06	9.70006e+06	9.01391e+06	C04785	ko00592,ko01100,ko01110
mws0193	C7H15N3O3	L-Homocitrulline	Amino acids and derivatives	1190-49-4	160376	206453	309915	9	9	9	2.55775e+06	1.10794e+06	2.41749e+06	219768	2.00107e+06	2.72832e+06	C02427	-
pmn001681	C10H14O2	1-(4-Methoxyphenyl)-1-propanol	Phenolic acids	5349-60-0	1.82775e+06	1.35365e+06	1.53512e+06	1.5469e+06	1.59446e+06	996365	1.09332e+06	858165	878324	810926	993631	977104	-	-
pmc0281	C15H21N5O8	Ribosyladenosine	Nucleotides and derivatives	-	4.50588e+07	6.85633e+07	4.55973e+07	3.57601e+07	4.29244e+07	4.67416e+07	4.6018e+06	4.72985e+06	4.86388e+06	4.10936e+06	2.98753e+07	3.57129e+07	-	-
pmf0289	C15H21N5O4	Riboprine	Nucleotides and derivatives	7724-76-7	38612.2	45652.4	96821.2	80036.6	75892.4	56279.3	25192.2	40304.4	27120	27507.3	44485.5	53881.2	C16427	ko00908,ko01110
mws0609	C10H12N5O7P	Guanosine 3',5'-cyclic monophosphate	Nucleotides and derivatives	7665-99-8	9.33522e+06	7.09294e+06	8.79436e+06	7.86549e+06	1.27244e+07	1.34444e+07	1.35766e+06	1.42592e+06	1.59669e+06	1.4094e+06	1.12754e+06	1.47817e+06	C00942	ko00230,ko01100
Lmfn000604	C13H16O10	6-O-Galloyl-β-D-glucose	Phenolic acids	13186-19-1	177293	713849	778424	44529.7	12254.7	51388.8	1.46469e+06	1.81515e+06	2.00117e+06	2.3226e+06	3.50413e+06	3.40375e+06	-	-
mws0344	C5H10O6	D-Xylonic acid	Others	526-91-0	3.26662e+06	6.41219e+06	3.35503e+06	4.2568e+06	3.99758e+06	3.91528e+06	5.11573e+06	3.02053e+06	3.14596e+06	819561	1.34128e+06	1.3097e+06	C00502	ko00040,ko01100
Zmyn004676	C18H30O3	17-Hydroxylinolenic acid	Lipids	-	329961	285003	351734	486223	586132	505769	366237	518259	167800	234375	100120	99216.1	C16346	ko00592
Cmjn004337	C18H26O10	Benzyl-(2''-O-xylosyl)glucoside	Phenolic acids	-	19365.5	63390.4	75056.7	38374.1	36296.2	27164.9	1.1297e+07	1.19475e+07	9.39722e+06	1.42783e+07	1.09689e+07	1.17484e+07	-	-
pmn001710	C24H26O13	Rosmarinic acid-3'-O-glucoside	Phenolic acids	910028-78-3	308082	108034	294560	142896	87820.9	44425.2	4.10113e+07	4.29466e+07	4.7205e+07	4.71207e+07	7.24256e+07	7.50123e+07	-	-
pme2589	C6H8O5	2-Oxoadipic acid	Organic acids	3184-35-8	177821	194287	227607	71055.2	38719.3	52830.1	73795.6	108953	136078	61421	71913.7	134886	C00322	ko00300,ko00310,ko00380,ko01100,ko01110,ko01210,ko01230,ko01240
Lmhp010099	C30H52NO7P	LysoPC 22:5	Lipids	-	25232.6	85577.7	138704	79947	67991.1	146266	1.38051e+06	718440	1.02313e+06	115999	249741	176314	-	-
mws0884	C10H12N5O6P	Cyclic 3',5'-Adenylic acid	Nucleotides and derivatives	60-92-4	1.7826e+07	7.83493e+06	1.45119e+07	1.35264e+07	2.09785e+07	1.87116e+07	1.82856e+06	2.53223e+06	2.58896e+06	2.418e+06	1.74828e+06	2.25618e+06	C00575	ko00230,ko01100
Lmpp003268	C33H40O20	Kaempferol-3-O-rutinoside-7-O-glucoside	Flavonoids	34336-18-0	4584.21	2382.04	5126.89	687.711	4436.99	1041.68	10137.2	10669.1	2.03454e+06	15426	17550.4	98450.4	-	-
MWS5164	C8H18N4O2	N,N'-Dimethylarginine;SDMA	Amino acids and derivatives	30344-00-4	1.31737e+06	1.01458e+06	1.19531e+06	4.67335e+06	4.67808e+06	5.44534e+06	1.54565e+06	1.06415e+06	1.28291e+06	286901	632079	602833	-	-
Lmtp008511	C15H22O	Santalal	Terpenoids	59331-83-8	103639	132669	122230	168967	114491	206923	263910	254124	283025	222421	377570	494907	-	-
pme2746	C27H33N9O15P2	Riboflavin 5'-Adenosine Diphosphate	Nucleotides and derivatives	146-14-5	1.91676e+06	2.10846e+06	2.11671e+06	1.83576e+06	1.75387e+06	1.81527e+06	1.63801e+06	1.55323e+06	1.72802e+06	602389	1.45541e+06	1.9078e+06	C00016	ko00740,ko01100,ko01110,ko01240
Zmjp000182	C7H16N4O2	N-Monomethyl-L-arginine	Amino acids and derivatives	17035-90-4	747034	494677	542420	1.77213e+06	1.17981e+06	1.58281e+06	4.35976e+06	2.392e+06	3.62757e+06	451858	1.56339e+06	1.35172e+06	C03884	-
Wbtp007382	C19H20O6	1,2,6-trihydroxy-5-methoxy-7-(3-methylbut-2-en-1-yl)-4a,9a-dihydroxanthen-9-one	Flavonoids	-	2471.89	6227.15	3680.55	5495.88	2305.47	9792.11	477243	520863	535414	401880	173957	189216	-	-
Zmhn002301	C15H18O8	p-Coumaric acid-4-O-glucoside	Phenolic acids	117405-48-8	23916.9	60613.3	9	12640.4	38102.6	28965.6	1.06169e+06	741039	1.8204e+06	526501	1.08258e+06	1.1423e+06	C06739	-
pmd0146	C28H54NO7P	LysoPC 20:2(2n isomer)	Lipids	-	61255.3	378240	259437	285241	219032	277215	2.15237e+06	1.22242e+06	1.82428e+06	853583	4.61898e+06	4.63987e+06	-	-
MWS201437	C10H18N2O5	Leu-Asp	Amino acids and derivatives	32949-40-9	3.54928e+06	4.44942e+06	5.00169e+06	5.95317e+06	5.9856e+06	5.4634e+06	1.35543e+06	1.22253e+06	1.00052e+06	666772	907822	781621	-	-
MWS5231	C13H24O4	Tridecanedioic acid	Lipids	505-52-2	1.22092e+06	1.33482e+06	1.55538e+06	1.05838e+06	1.24766e+06	1.30859e+06	1.21568e+06	1.31927e+06	2.01851e+06	1.17538e+06	1.10046e+06	1.15608e+06	-	-
Wbtn011825	C20H20O6	1,6-dihydroxy-3,7-dimethoxy-2-(3-methylbut-2-en-1-yl)xanthen-9-one	Flavonoids	-	11638.2	47724.3	41573.8	65557.7	68904.3	63258.9	1.65999e+06	1.71694e+06	1.20619e+06	904206	1.07769e+06	934393	-	-
MWS0618	C9H19NO4	Pantothenol	Others	16485-10-2	12049.2	16424.4	7343.68	5159.78	4617.4	6657.32	72967.2	56357.1	54261.1	35793.8	58245.2	66611.4	-	-
pmb3101	C7H12O5	2-Isopropylmalic Acid	Organic acids	49601-06-1	211049	348674	464661	614444	637455	686196	2.63279e+06	3.66884e+06	8.17115e+06	507010	1.54685e+06	4.46011e+06	C02504	ko00290,ko00620,ko01100,ko01110,ko01210,ko01230
MWS1962	C10H16O	cis-Citral	Organic acids	5392-40-5	1.39794e+06	1.9146e+06	2.04292e+06	1.88722e+06	1.66098e+06	1.65724e+06	2.24132e+06	2.1633e+06	2.20646e+06	2.18605e+06	2.28085e+06	2.27455e+06	C09847	ko01110
pmb0532	C10H13N4O8P	Inosine 5'-monophosphate	Nucleotides and derivatives	131-99-7	4.68789e+06	3.12221e+06	4.50992e+06	3.63057e+06	6.06922e+06	4.19217e+06	920033	679940	636731	422364	585248	547383	C00130	ko00230,ko01100,ko01110,ko01232,ko01240
Lmjp007790	C18H16O6	5-Hydroxy-3,7,4'-trimethoxyflavone	Flavonoids	-	13125.6	20531	44953.4	48402.8	37478.6	33897.3	1.13777e+07	1.36381e+07	1.17864e+07	7.1232e+06	3.89398e+06	4.26593e+06	-	-
MWSslk051	C8H13NO2	Scopine	Alkaloids	498-45-3	2.57009e+06	3.39638e+06	3.70757e+06	3.37252e+06	3.20587e+06	3.02528e+06	3658175	3.58271e+06	3.58944e+06	3.63203e+06	3.95968e+06	3.8091e+06	-	-
Hmqn002118	C9H6O3	7-Hydroxycoumarin;Umbelliferone	Lignans and Coumarins	93-35-6	14403.4	6455.87	64119.3	3970.74	7552.48	4908.84	3.8424e+06	3.26893e+06	5.696e+06	5.15634e+06	6.24462e+06	6.40562e+06	C09315	ko00999,ko01110
Lmqn005404	C20H20O12	4-Hydroxybenzoyl-1-O-(6''-O-galloyl)glucoside	Phenolic acids	-	5595.92	9	7555.76	40541.3	67259	53258.6	1.91608e+07	1.83074e+07	8.31163e+06	1.79999e+07	9.24063e+06	4.19415e+06	-	-
pmb0880	C23H48NO7P	LysoPE 18:0(2n isomer)	Lipids	-	184701	402415	272142	184820	269285	232017	220526	218766	188185	189845	256439	314935	-	-
pme0243	C5H8O4	Glutaric acid	Organic acids	110-94-1	568430	420365	484500	726316	685200	572603	1.16113e+06	617325	1.0416e+06	712800	2.30802e+06	3.07244e+06	C00489	ko00071,ko00310,ko01100
pma6460	C16H18O8	4-O-p-Coumaroylquinic acid	Phenolic acids	32451-86-8	9	6412.12	11370.7	12477.6	15101.7	16092.2	99765.3	97377.6	189492	122437	190692	208902	C10441	-
MWS201443	C9H19N3O4	Ser-Lys	Amino acids and derivatives	22677-61-8	1.07223e+06	771304	571792	462457	516322	603701	188830	74872.7	191116	173173	176280	180275	-	-
mws0277	C7H12O6	Quinic Acid	Organic acids	77-95-2	698622	1.07756e+06	1.14071e+06	1.74669e+06	1.85174e+06	1.51885e+06	566161	420164	559488	337937	587971	677551	C00296	ko00400,ko01100
MWSmce549	C17H34O4	1-Monomyristin	Lipids	589-68-4	8547.12	6436.87	6219.18	48385.3	7071.96	57770.8	494625	537919	390046	437792	294393	302404	-	-
MWStz070	C9H11NO3	N-(2-Hydroxy-4-methoxyphenyl)acetamide	Alkaloids	58469-06-0	1.74866e+07	1.09145e+07	9.47466e+06	5.59083e+06	4.51506e+06	6.40285e+06	8.32665e+06	5.2183e+06	8.42499e+06	3.46322e+06	8.74518e+06	9.00726e+06	-	-
MWS00411g	C6H11NO4	L-2-Aminoadipate	Amino acids and derivatives	1118-90-7	160513	499182	284634	206761	165066	200790	200155	168872	199906	85935.7	154166	239261	-	-
mws0853	C11H14O4	Sinapyl alcohol	Phenolic acids	537-33-7	2.866e+06	2.1424e+06	1.99812e+06	443122	629156	602281	535461	450423	773352	307007	367967	439894	C02325	ko00940,ko01100,ko01110
mws1200	C10H10O3	p-Coumaric acid methyl ester	Phenolic acids	19367-38-5	142927	103230	34905.3	23237	22964.6	25274.6	418015	411466	1.03264e+06	60032.5	118162	196518	-	-
MWSmce052	C30H48O3	3-Hydroxyurs-12-en-28-oic acid (3-Epiursolic acid)	Terpenoids	989-30-0	26184.7	7620.54	17145.1	15969	18737.6	19723.9	8.10696e+06	8.14339e+06	1.04447e+07	7.56709e+06	8.42737e+06	1.06016e+07	-	-
Lmxp001668	C9H10O2	2-Methoxy-4-ethenylphenol	Phenolic acids	7786-61-0	1.76514e+06	3.14875e+06	1.3982e+06	407605	431478	126406	261693	381710	341675	348004	473780	403791	C17883	-
Smcp000882	C15H21NO7	N-benzoyl-2-aminoethyl-β-D-glucopyranoside	Alkaloids	-	108208	167811	150766	100329	35470	113892	305039	328893	419149	207496	253347	289732	-	-
mws1014	C10H8O5	Fraxetin (7,8-Dihydroxy-6-methoxycoumarin)	Lignans and Coumarins	574-84-5	3.32813e+06	1.58492e+06	1.65589e+06	562229	733761	714318	2.54295e+06	5.98543e+06	1.94313e+06	1.2843e+06	1.82323e+06	4.28754e+06	C09265	ko00999,ko01110
Lmbn001364	C5H8O4	4-Hydroxy-2-Oxopentanoic Acid	Organic acids	3318-73-8	51390.9	22337.9	29979.5	29083	23456.5	23360.7	105888	83396.3	92537	114072	180861	206418	C03589	ko00360,ko01100
mws0281	C6H8O7	Citric Acid	Organic acids	77-92-9	2.7341e+07	3.87785e+07	4.10885e+07	6.80469e+07	6.44272e+07	5.60247e+07	3.06021e+07	1.7033e+07	2.86321e+07	1.10939e+07	3.35297e+07	3.76466e+07	C00158	ko00020,ko00250,ko00630,ko01100,ko01110,ko01200,ko01210,ko01230,ko01240
Zbzp007301	C18H28O3	2-Methoxy-6-undecyl-1,4-benzoquinone	Quinones	-	34214.2	23053.9	28891.8	45064.2	53084.5	58518.1	115675	177795	105155	32785.3	33914.3	33368	-	-
pme2617	C5H11NO3S	L-Methionine Sulfoxide	Amino acids and derivatives	3226-65-1	1.55863e+06	1.94012e+06	2.30168e+06	2.13444e+06	2.0634e+06	1.86307e+06	2.30951e+06	2.2881e+06	2.2201e+06	2.48171e+06	2.41632e+06	2.42654e+06	C02989	ko00270,ko01100
pmb1754	C5H15NO4P+	O-Phosphocholine	Alkaloids	107-73-3	5.44677e+06	9.31879e+06	8.57559e+06	9.21899e+06	1.01606e+07	7.67379e+06	4.2803e+06	4.23024e+06	3.80905e+06	2.12473e+06	3.67996e+06	6.83608e+06	C00588	ko00564,ko01100
MWS201419	C8H17N3O3	Lys-Gly	Amino acids and derivatives	7563-03-3	1.34032e+07	1.8403e+07	1.89215e+07	1.8621e+07	1.71508e+07	1.67619e+07	2.12235e+07	2.19836e+07	2.26472e+07	2.07805e+07	2.37848e+07	2.23674e+07	-	-
Lmxn015337	C17H34O2	Methyl palmitate	Lipids	112-39-0	14152.4	22739.7	18913.3	43377.7	29535	31410.1	76283.9	59471.1	54348.5	16307.8	20198.5	26237.2	C16995	-
Lmhp001461	C11H20N2O3	L-Prolyl-L-Leucine	Amino acids and derivatives	52899-07-7	1.82326e+06	2.38191e+06	2.86447e+06	2.05621e+06	2.09443e+06	1.86771e+06	938199	786978	727876	456997	751237	653856	-	-
Hmgn001278	C20H30O12	Verbasoside	Phenolic acids	61548-34-3	39660.6	133441	32907.7	46853.9	52368	48757.4	510917	450909	734951	550452	530563	598769	-	-
mws2523	C12H23O14P	Trehalose 6-phosphate	Others	4484-88-2	284015	440357	333663	301461	430666	331020	692535	709308	549231	111705	174688	207360	C00689	ko00500,ko01100,ko01110
pma6298	C5H5NO	3-Hydroxypyridine	Alkaloids	109-00-2	191403	68274.1	57156.3	162512	24153.5	119757	247170	54159.9	370413	148322	215482	222131	-	-
mws0854	C6H12O5	Rhamnose	Others	3615-41-6	229349	84383.7	532924	180114	270849	287870	102212	43594.4	69799.4	26486.9	51046.7	53205.9	C00507	ko00051,ko01100
pmf0297	C20H42O	1-Eicosanol	Lipids	629-96-9	1.65209e+06	724336	1.50189e+06	1.78285e+06	2.72401e+06	809441	174737	170596	171784	92528.7	205828	262154	-	-
Hajp012062	C16H22O4	Dibutyl phthalate	Phenolic acids	84-74-2	1.91363e+06	2.37079e+06	2.58629e+06	1.80258e+06	1.63997e+06	2.02046e+06	2.31959e+06	1.89198e+06	2.07277e+06	2.00025e+06	1.73507e+06	1.31707e+06	C14214	-
mws0369	C20H32O2	Arachidonic Acid	Lipids	506-32-1	85622.9	421080	341897	587717	407184	567998	216103	200795	175368	64802.5	122376	141692	C00219	ko00590,ko00591,ko01040,ko01100
Zmzn000078	C3H7O6P	Dihydroxyacetone phosphate	Others	57-04-5	82782.6	123402	98513.4	207658	332459	310704	53789	62704.1	52304.2	29516.6	47937.5	44787.2	C00111	ko00010,ko00040,ko00051,ko00052,ko00561,ko00562,ko00564,ko00640,ko00710,ko00760,ko01100,ko01110,ko01200,ko01230
MWSmce345	C30H46O3	3-Oxoolean-12-en-28-oic Acid (Oleanonic acid)	Terpenoids	17990-42-0	9	9	9	9	9	9	24211.6	23599.9	23312.6	18000.6	10665.9	32446.3	-	-
mws0133	C6H6N2O	Nicotinamide	Others	98-92-0	1.43779e+07	1.12894e+07	1.22776e+07	9.63038e+06	8.84417e+06	8.15808e+06	8.04451e+06	7.4242e+06	8.75466e+06	5.44875e+06	5.89153e+06	8.29443e+06	C00153	ko00760,ko01100,ko01240
MWSmce257	C9H17NO5	D-Pantothenic Acid	Others	79-83-4	4.91568e+06	4.5579e+06	3.07078e+06	2.95344e+06	2.72542e+06	2.44907e+06	5.96054e+06	5.06829e+06	6.93262e+06	5.46282e+06	8.99804e+06	8.62671e+06	C00864	ko00410,ko00770,ko01100,ko01110,ko01240
Zmpn003368	C18H30O3	13S-Hydroxy-9Z,11E,15Z-octadecatrienoic acid	Lipids	87984-82-5	670903	578212	637977	899645	993508	901729	26278.7	31955.9	31614.3	15529.2	17802.6	17841.2	C16316	ko00592
Lmcp001538	C7H8N4O2	Theobromine	Alkaloids	83-67-0	153211	259485	76009.6	58000.2	77789.4	99443.7	501554	845032	1.02114e+06	686759	976747	1.0823e+06	C07480	ko00232,ko01100,ko01110
pmb2591	C13H14N2O3	N-Acetyl-L-Tryptophan	Amino acids and derivatives	1218-34-4	1.00258e+06	1.93824e+06	864691	1.02216e+06	1.04889e+06	985147	150182	128144	153678	109101	254350	166687	-	-
pme2292	C4H12N2	Putrescine	Alkaloids	110-60-1	2.73914e+06	2.64367e+06	1.6105e+06	587569	1.09443e+06	1.43688e+06	397859	223848	344415	155252	170503	162036	C00134	ko00330,ko00470,ko00480,ko00960,ko01100,ko01110,ko02010
pme0033	C5H4N4O	Hypoxanthine	Nucleotides and derivatives	68-94-0	257340	607999	344471	1.40725e+06	782963	578132	1.53716e+06	1.1605e+06	944205	1.28232e+06	1.45153e+06	1.18409e+06	C00262	ko00230,ko01100,ko01232
HJN025	C7H8O2	4-Hydroxybenzyl Alcohol	Phenolic acids	623-05-2	10191	6154.03	28522.7	5048.11	6960.01	5645.11	752582	723806	873242	970064	1.00673e+06	935836	C17467	-
mws4175	C6H8O6	D-Glucurono-6,3-lactone	Others	32449-92-6	22100.1	31531.4	18528.9	27365.5	15293.9	18382.8	51003.5	58912.2	69844.6	60653.5	41617.1	45194.5	C02670	ko00053,ko01100
pmn001378	C26H32O11	Pinoresinol-4-O-glucoside	Lignans and Coumarins	41607-20-9	57974.3	19019.1	67626.2	35246.2	29839	28566.2	1.05612e+07	8.47235e+06	1.12326e+07	1.13759e+07	1.12208e+07	8.00124e+06	C17529	-
Lmhp009464	C22H44NO7P	LysoPE 17:1(2n isomer)	Lipids	-	537936	4.65214e+06	2.78627e+06	550395	591349	1.27309e+06	9.73422e+06	9.97829e+06	1.00472e+07	6.45406e+06	8.96876e+06	7.8728e+06	-	-
Lmhp009802	C25H46NO7P	LysoPE 20:3(2n isomer)	Lipids	-	13498.1	127863	97977.3	93422.7	90242.6	68171.2	1.21888e+06	640068	973397	215876	1.56206e+06	1.92716e+06	-	-
MWS20033	C20H30O4	20-Carboxyarachidonic Acid	Lipids	79551-84-1	14765.3	6815.95	12690.3	7067.36	12248.9	7574.67	382075	211643	232582	160293	124662	155691	-	-
Lmbn000216	C5H8O5	3-Methylmalic acid	Organic acids	152204-30-3	897937	1.20605e+06	1.16003e+06	1.70509e+06	1.47132e+06	1.39653e+06	923313	460483	851622	242167	812468	835758	C06032	ko00290,ko00660,ko01100,ko01210,ko01230
MWS201394	C13H18N2O5	Thr-Tyr	Amino acids and derivatives	145295-02-9	73931.6	95398.3	124889	120885	151340	124155	67949	77509	77519.1	49637.6	74917.1	98791.2	-	-
MWS2910	C10H15N3O4	5-Methyl-2'-Deoxycytidine	Nucleotides and derivatives	838-07-3	83589.4	99083	84352.9	68541.3	122364	80180.6	51165.5	88902	87399.8	66610.4	153812	153320	C03592	-
pmn001423	C19H30O8	Roseoside	Others	54835-70-0	317045	306404	173082	41450.6	50430	65780.2	1.69915e+07	8.86829e+06	1.70736e+07	3.43424e+06	8.05656e+06	6.24047e+06	-	-
Zmpn000095	C6H15O9P	Sorbitol-6-phosphate	Others	20479-58-7	1.32666e+06	1.00865e+06	963426	1.51484e+06	1.37223e+06	1.3829e+06	244853	191540	166121	48375.4	101392	66537.9	C01096	ko00051,ko01100
pme3007	C9H14N2O12P2	Uridine 5'-diphosphate	Nucleotides and derivatives	27821-45-0	228246	290577	237864	343307	319663	115044	235076	302637	315183	313003	338360	357352	C00015	ko00240,ko00908,ko01100,ko01232,ko01240
mws0066	C16H12O7	Isorhamnetin; 3'-Methoxy-3,4',5,7-Tetrahydroxyflavone	Flavonoids	480-19-3	6623.67	729.003	2847.97	2538.74	2223.76	1114.94	282352	236825	302522	313803	243444	265742	C10084	-
Jmwn002620	C15H18O9	Vanillic Acid-4-O-Glucuronide	Phenolic acids	-	81841.1	33118.9	21299	24448.7	20845.1	30092.6	3.84246e+07	4.00968e+07	3.69446e+07	1.5912e+07	3.03355e+07	2.84221e+07	-	-
pme1173	C5H4N4O	Allopurinol	Nucleotides and derivatives	315-30-0	938261	4.95213e+06	3.30239e+06	7.69675e+06	5.53656e+06	5.60469e+06	6.10053e+06	3.6993e+06	6.38252e+06	2.65206e+06	7.25833e+06	9.83244e+06	-	-
pmd0142	C28H58NO7P	LysoPC 20:0(2n isomer)	Lipids	-	8802.04	7281.59	70097.9	48924	37219.1	11997.2	265934	153945	161586	85563	212005	351062	-	-
MWSmce709	C9H7N	Isoquinoline	Alkaloids	119-65-3	3.10443e+06	2.3116e+06	1.86318e+06	1.04896e+06	713442	938315	4.40818e+06	3.11347e+06	3.08856e+06	1.04653e+06	1.48305e+06	1.56603e+06	C06323	-
Zbdn002066	C13H18O8	Tachioside	Phenolic acids	109194-60-7	175711	741823	1.01431e+06	66507.6	57294.8	71790.3	838006	845083	1.00466e+06	1.81318e+06	1.94566e+06	1.95384e+06	-	-
MWS1787	C6H7N	2-Picoline; 2-Methylpyridine	Alkaloids	109-06-8	5.1738e+06	7.02307e+06	7.82637e+06	7.57704e+06	6.66647e+06	6.06638e+06	7.80312e+06	8.17582e+06	8.80658e+06	9.48009e+06	8.78801e+06	8.74356e+06	C14447	-
pme2435	C6H12O5	L-Fucose	Others	2438-80-4	1.73579e+06	1.5857e+06	2.9623e+06	1.97437e+06	2.24379e+06	2.00223e+06	44324.7	10421	16990.6	2228.86	31090.3	28096.5	C01019	ko00051,ko00520,ko01100,ko01250
mws1595	C6H12O5	D-Fucose	Others	3615-37-0	1.73579e+06	1.5857e+06	2.9623e+06	1.97437e+06	2.24379e+06	2.00223e+06	44324.7	10421	16990.6	2228.86	31090.3	28096.5	C01018	-
mws0582	C11H19N3O6S	S-(Methyl)glutathione	Amino acids and derivatives	2922-56-7	1.79638e+06	2.02282e+06	1.56735e+06	983825	983766	950206	737055	644531	679464	595546	712039	705395	C11347	-
pme1306	C8H12NO6P	Pyridoxine-5'-phosphate	Others	447-05-2	73847	111926	201604	170841	157621	132036	130689	81955.8	105363	36060.8	93661.4	131823	C00627	ko00750,ko01100,ko01240
mws0093	C10H12O3	Coniferyl alcohol	Phenolic acids	458-35-5	794457	577166	651782	502346	511926	430961	337764	433041	454376	935274	389368	323334	C00590	ko00940,ko00999,ko01100,ko01110
MWS2072	C7H5N3O2	5-Nitrobenzimidazole	Alkaloids	94-52-0	6697.77	1144.09	27096.9	2697.76	5815.28	2679.42	1.48689e+06	1.47938e+06	1.8666e+06	1.52324e+06	2.0059e+06	1.93418e+06	-	-
mws5041	C8H16N2O3	L-Glycyl-L-isoleucine	Amino acids and derivatives	19461-38-2	426698	372357	629662	940045	1.08022e+06	1.0015e+06	241725	243563	266593	144945	255597	162505	-	-
MWS4354	C11H15N5O4	N6-methyladenosine	Nucleotides and derivatives	1867-73-8	1.00351e+06	736469	664413	394863	412825	447432	715425	683098	772852	579291	621426	714415	-	-
pmb1587	C13H18O2	4-Hydroxy-3,5-diisopropylbenzaldehyde	Phenolic acids	10537-86-7	264156	216258	304115	259358	247428	265634	185633	386721	239374	278802	253177	259318	-	-
MWS2984	C4H4N6O	8-Azaguanine	Nucleotides and derivatives	134-58-7	383561	377068	500874	647594	536966	581824	2.9471e+06	2.59843e+06	2.35558e+06	2.26032e+06	2.11809e+06	2.83453e+06	-	-
Lmsn000381	C12H22O11	D-Maltose	Others	69-79-4	3.03054e+06	262154	292127	245711	159661	306199	1.27526e+07	1.29769e+07	6.88569e+06	9.13531e+06	4.44366e+06	4.44077e+06	C01971	-
mws1155	C6H14O6	D-Mannitol	Others	69-65-8	1.61593e+07	1.28613e+07	2.43607e+07	2.14551e+07	1.55575e+07	1.92654e+07	66164.2	166571	125573	16998.9	20166.3	22826.5	C00392	ko00051,ko01100,ko02010
Zmzp000145	C9H20N2O2	Trimethyllysine	Amino acids and derivatives	23284-33-5	4.07993e+06	4.83245e+06	4.05022e+06	5.59848e+06	2.86088e+06	4.05222e+06	7.70852e+07	3.33213e+07	7.02712e+07	4.08095e+06	6.35323e+07	8.94409e+07	C03793	ko00310,ko01100
pme1109	C5H5N5O	Guanine	Nucleotides and derivatives	73-40-5	5.46158e+06	3.74942e+06	3.71178e+06	5.86502e+06	4.45306e+06	3.6624e+06	3.43658e+07	2.60645e+07	32807058	2.23555e+07	2.09866e+07	2.52272e+07	C00242	ko00230,ko01100,ko01232
Lmrj002087	C10H18N2O5	L-Isoleucyl-L-Aspartate	Amino acids and derivatives	-	2.28659e+06	1.94558e+06	2.62352e+06	8.89541e+06	9.65685e+06	7.57174e+06	2.5958e+06	2.50158e+06	3.10476e+06	393002	1.07832e+06	481912	-	-
Lmhp008440	C20H40NO7P	LysoPE 15:1	Lipids	-	17298.1	67692.5	62160.5	27622.6	42091.7	53083	910709	429117	748793	131556	374638	228487	-	-
MWS201479	C11H14N2O4	Tyr-Gly	Amino acids and derivatives	673-08-5	1.02995e+06	887881	1.54543e+06	1.44628e+06	1.39306e+06	1.26647e+06	334222	346447	362944	145185	222704	218302	-	-
pme3184	C10H14N5O6P	2'-Deoxyadenosine-5'-monophosphate	Nucleotides and derivatives	653-63-4	1.61885e+06	1.59454e+06	1.53143e+06	1.65341e+06	1.25455e+06	1.62722e+06	1.15374e+06	860430	1.08967e+06	584124	1.18985e+06	1.25699e+06	C00360	ko00230,ko01100,ko01232
MWS201442	C13H18N2O4	Phe-Thr	Amino acids and derivatives	51352-44-4	568848	494182	818269	1.15591e+06	1.30714e+06	1.08284e+06	454187	371557	306561	139052	228949	248644	-	-
pmb0856	C23H46NO7P	LysoPE 18:1(2n isomer)	Lipids	-	982386	2.14982e+06	1.27513e+06	1.59464e+06	1.55701e+06	1.00391e+06	821408	278957	556175	315778	773530	591388	-	-
Lmbp000728	C8H8O	(S)-2-Phenyloxirane	Phenolic acids	20780-54-5	8.53565e+06	6.03182e+06	8.58021e+06	6.14272e+06	4.24357e+06	5.95117e+06	2.70921e+07	2.43388e+07	2.88923e+07	1.04922e+07	1.18542e+07	9.9992e+06	C20782	ko01100
Wmhp000055	C8H8O4	2,5-Dimethoxybenzoquinone	Quinones	3117-03-1	1.38523e+06	2.18211e+06	1.63672e+06	1.30657e+06	1.5735e+06	1.99523e+06	90491.1	74978	84851.1	105648	63026.3	64035.2	-	-
Lmmn000774	C15H20O9	Dihydrocaffeoylglucose	Phenolic acids	-	163743	227683	267204	230345	230866	283606	3.13179e+06	2.63336e+06	4.03548e+06	4.31387e+06	4.47885e+06	5.07109e+06	-	-
mws0576	C4H8O3	3-Hydroxybutyric acid	Organic acids	300-85-6	9.71726e+06	1.6836e+07	1.37314e+07	9.64059e+06	1.01273e+07	9.35007e+06	3.97085e+06	3.55819e+06	2.44378e+06	4.23028e+06	3.01561e+06	2.52431e+06	C01089	ko00650,ko01100
MWS4295	C18H36O3	DL-2-hydroxystearic acid	Lipids	629-22-1	329183	649187	254160	381062	432829	338923	159784	195760	147104	110755	172823	140638	-	-
pme1286	C14H20N6O5S	S-(5'-Adenosy)-L-homocysteine	Amino acids and derivatives	979-92-0	562160	651012	642465	670211	781654	725210	395228	388589	674549	189342	383200	374695	C00021	ko00270,ko01100,ko01230,ko01240
pme3017	C4H9NO2	2-Aminoisobutyric acid	Organic acids	62-57-7	1.78085e+07	1.93066e+07	2.12702e+07	1.76768e+07	1.69684e+07	1.6813e+07	1.09753e+07	9.55414e+06	9.46703e+06	6.02472e+06	8.13093e+06	8.27766e+06	C03665	-
MWStz063	C10H19NO	2-Ethyl-2,6,6-trimethylpiperidin-4-one	Alkaloids	133568-79-3	258885	263891	206801	171538	148899	178948	247282	246375	233324	175169	213273	196378	-	-
mws4532g	C5H12N2O2	D-Ornithine	Amino acids and derivatives	348-66-3	565415	531731	604941	497439	354974	397742	999290	701940	910271	174874	245727	198321	-	-
mws0668	C10H12N4O6	Xanthosine	Nucleotides and derivatives	146-80-5	6.04301e+06	1.53799e+07	1.47323e+07	1.52622e+07	2.03128e+07	2.0738e+07	2.68837e+06	2.8815e+06	2.89135e+06	3.09168e+06	5.5288e+06	5.93264e+06	C01762	ko00230,ko00232,ko01100,ko01110,ko01232,ko02010
mws1382	C9H10O3	4'-Hydroxy-3'-methoxyacetophenone (Acetovanillone)	Phenolic acids	498-02-2	3375.92	3874.18	7225.37	9	9	9	108360	168891	155667	155931	148501	186041	C11380	-
Hmtp001106	C8H8O3	Aquilegiolide	Others	94481-79-5	83069.9	84456	41356	74332.7	68993.8	116362	1.08457e+06	1.10968e+06	1.42008e+06	1.57999e+06	2.00059e+06	1.92195e+06	-	-
pmp001287	C8H9N	N-Benzylmethylene isomethylamine	Alkaloids	-	3.47723e+06	3.06771e+06	2.94878e+06	2.68876e+06	2.23479e+06	2.48685e+06	2.45469e+06	1.44186e+06	2.10322e+06	497995	2.31672e+06	2.59525e+06	-	-
MWSmce564	C15H22O	Germacrone	Terpenoids	6902-91-6	210941	249585	209161	200585	177152	237670	506543	482635	432146	514222	556001	545241	C16966	-
Zmyn005384	C18H36O3	2R-Hydroxyoctadecanoic Acid	Lipids	26633-48-7	337799	681990	259151	270008	439540	282438	164347	177421	144175	102745	182948	147772	C03042	-
Hmcp005697	C30H48O	Olean-13(18)-en-3-one (δ-Amyrenone)	Terpenoids	20248-08-2	46913.2	91326.3	145630	15979.7	16193.4	25681.9	559138	516673	608160	331135	279875	298572	-	-
pme2253	C6H10O6	L-Gulono-1,4-Lactone	Others	1128-23-0	174444	327343	492657	297821	269530	244560	216973	212114	526517	761902	973708	730088	C01040	ko00053,ko01100,ko01240
MWS201400	C16H21N3O3	Val-Trp	Amino acids and derivatives	24587-37-9	109550	126767	191941	218247	249768	237439	163380	138662	173960	60877.1	158263	282981	-	-
Zmgn001448	C7H12O5	2-Propylmalic Acid	Organic acids	-	316340	564973	612852	1.11981e+06	869770	1.05162e+06	3.78611e+06	5.1779e+06	1.20414e+07	767111	2.4803e+06	7.79498e+06	C05994	ko00620
Lmbn001754	C7H12O5	3-Isopropylmalic Acid	Organic acids	921-28-8	316340	564973	612852	1.11981e+06	869770	1.05162e+06	3.78611e+06	5.1779e+06	1.20414e+07	767111	2.4803e+06	7.79498e+06	C04411	ko00290,ko01100,ko01110,ko01210,ko01230
Lmhp008833	C24H48NO7P	LysoPC 16:1(2n isomer)	Lipids	-	67584.4	205918	161570	180142	173050	194102	581232	290443	445303	239130	1.49643e+06	1.57563e+06	-	-
pmd0160	C21H44NO7P	LysoPE 16:0(2n isomer)	Lipids	-	1.01449e+07	2.45273e+07	2.33642e+07	1.34696e+07	1.84009e+07	1.7448e+07	2.44209e+07	2.29443e+07	2.27492e+07	9.60915e+06	1.5486e+07	2.32222e+07	-	-
pme0137	C7H12N2O4	N-Acetyl-L-Glutamine	Amino acids and derivatives	2490-97-3	978879	1.08688e+06	1.03736e+06	331010	485285	438125	765992	625303	508302	557575	464273	535666	-	-
mws0470	C4H6O4	Methylmalonic acid	Organic acids	516-05-2	2.1136e+07	9	1.96264e+07	3.3504e+07	4.16603e+07	4.19181e+07	1.02903e+08	5.11851e+07	8.08307e+07	7.51695e+07	1.34084e+08	1.35436e+08	C02170	ko00240,ko00280,ko00640,ko01100
mws0256	C5H11NO2	L-Valine	Amino acids and derivatives	72-18-4	7.62718e+06	6.66581e+06	5.59666e+06	4.96558e+06	4.71274e+06	4.89968e+06	9.00171e+06	5.32939e+06	7.44275e+06	2.29265e+06	7.81385e+06	9.42549e+06	C00183	ko00280,ko00290,ko00460,ko00770,ko00966,ko00970,ko01100,ko01110,ko01210,ko01230,ko01240,ko02010
pme0170	C8H16N4O3	N-Acetyl-L-Arginine	Amino acids and derivatives	155-84-0	309905	1.71635e+06	391432	336612	376036	381627	871149	686218	930626	265850	429892	448882	-	-
MWS4296	C11H14N2O3	Glycylphenylalanine	Amino acids and derivatives	3321-03-7	1.5884e+06	1.67714e+06	2.15407e+06	3.10054e+06	3.16201e+06	2.86735e+06	1.21604e+06	894908	924339	423436	647571	593833	-	-
pme2836	C10H11NO2	5-Hydroxytryptophol	Alkaloids	154-02-9	58767.7	150258	124951	44929.4	41984.5	24788	1.15849e+06	1.23697e+06	958820	972071	779943	463397	-	-
MWS00204g	C4H9NO2	N-Ethylglycine	Amino acids and derivatives	627-01-0	1.66328e+07	1.86842e+07	2.14911e+07	9	9	9	1.09113e+07	9	9.76014e+06	6.7551e+06	7.44938e+06	6.55963e+06	-	-
MWSmce577	C12H14O3	(E)-Ethyl p-methoxycinnamate	Phenolic acids	24393-56-4	253827	365656	426539	122031	103320	157463	244772	215769	305997	130466	174202	185449	-	-
Hmsp000364	C7H13NO2	L-Cyclopentylglycine	Amino acids and derivatives	2521-84-8	635032	939116	988098	754359	690820	596173	940565	769860	1.1872e+06	431487	847516	908882	-	-
pme1210	C5H11NO2S	L-Methionine	Amino acids and derivatives	63-68-3	2.9556e+06	2.33664e+06	2.475e+06	2.1328e+06	1.79493e+06	2.21499e+06	3.49443e+06	2.19665e+06	3.09252e+06	906112	2.71289e+06	3.44029e+06	C00073	ko00270,ko00470,ko00966,ko00970,ko00999,ko01100,ko01110,ko01210,ko01230,ko01240
Lmsn003628	C23H32O15	6'-O-Sinapoylsucrose	Phenolic acids	-	187648	167213	151405	62974.2	79839.7	101215	5.60471e+06	3.21494e+06	4.8285e+06	3.78208e+06	5.13036e+06	4.92557e+06	-	-
pmb0855	C24H50NO7P	LysoPC 16:0	Lipids	17364-16-8	791782	1.17246e+06	960555	606841	640583	627554	1.24612e+06	1.39034e+06	1.26795e+06	442668	857783	1.21763e+06	-	-
Lmhp008742	C28H48NO7P	LysoPC 20:5	Lipids	162440-04-2	1153.8	94936.4	87628.2	123323	31076.7	91258.6	2.1768e+06	688433	1.7699e+06	122628	3.9725e+06	5.89442e+06	-	-
Lmsn001014	C13H16O10	1-O-Galloyl-β-D-glucose	Phenolic acids	58511-73-2	210854	727213	762942	15905.3	36616.6	16195.2	1.47303e+06	1.80542e+06	2.03626e+06	2.32035e+06	3.51791e+06	3.40578e+06	C01158	ko00999
mws0639	C7H6O4	2,3-Dihydroxybenzoic Acid	Phenolic acids	303-38-8	177221	120614	316850	309196	127733	363975	5.08117e+06	5.8317e+06	5.54673e+06	1.02402e+07	1.87742e+07	1.58683e+07	C00196	ko01110
mws0147	C5H10O3	β-Hydroxyisovaleric acid	Organic acids	625-08-1	123456	136738	119068	139784	150156	153235	155829	192275	164678	99965.6	122576	114348	C20827	ko00280,ko01100
mws0027	C9H10O5	Syringic acid	Phenolic acids	530-57-4	142605	126848	123584	57561.3	64510.7	57531	885605	937147	888680	1.6403e+06	1.10538e+06	926362	C10833	-
MWS201439	C15H18N4O3	Phe-His	Amino acids and derivatives	16874-81-0	71630.1	80772.9	68685	104325	117703	121178	135482	112494	153711	79414.5	204029	187616	-	-
pme2165	C5H4N2O4	Orotic acid (Vitamin B13)	Others	65-86-1	2.38244e+06	2.21334e+06	2.0753e+06	2.62003e+06	2.44003e+06	2.31643e+06	1.27961e+06	1.01579e+06	1.29476e+06	603294	1.29729e+06	1.20417e+06	C00295	ko00240,ko01100,ko01240
Hmln002199	C23H22O13	Quercetin-3-O-(6''-O-acetyl)galactoside	Flavonoids	-	11522.5	1.95126e+07	470819	24139	14480.1	28211	7882.39	5067.51	18429.4	10323.5	12480.8	13871.4	-	-
MWS80007	C18H32O4	13-Hydroperoxy-9Z,11E-octadecadienoic acid	Lipids	23017-93-8	3.84648e+06	7.2645e+06	6.14832e+06	1.70113e+07	1.50668e+07	1.92923e+07	357280	471646	386473	289619	362673	277933	-	-
pme0500	C18H32O16	D-Melezitose	Others	597-12-6	271263	657533	599760	541586	445692	378836	3.29171e+06	3.15727e+06	2.63528e+06	1.88719e+06	2.03324e+06	2.08301e+06	C08243	-
pme1194	C9H13N3O4	2'-Deoxycytidine	Nucleotides and derivatives	951-77-9	71380.4	81567.7	90535.3	139287	153906	241749	226341	209562	172093	271359	285476	196561	C00881	ko00240,ko01100,ko01232,ko02010
MWS04447	C6H11NO2	Homoproline	Amino acids and derivatives	56879-46-0	869998	3.15372e+06	2.48659e+06	2.33596e+06	2.10002e+06	2.29065e+06	9.71141e+07	6.72415e+07	8.22157e+07	1.49608e+07	8.13583e+07	1.01892e+08	-	-
Zmdp001857	C14H18N2O6	γ-Glutamyltyrosine	Amino acids and derivatives	7432-23-7	3.51373e+06	4.44918e+06	2.79127e+06	2.11845e+06	2.46449e+06	2.72094e+06	1.5571e+06	1.13282e+06	1.29702e+06	485438	925984	1.02979e+06	-	-
Lmsp013456	C30H46O3	3-Hydroxytaraxastan-28,20-olide	Terpenoids	-	6153.52	8704.62	9165.44	7983.07	8854.02	7680.52	102560	87012.7	122429	35246.5	42986.9	38915.7	-	-
Lmtn002596	C26H34O11	Dihydrodehydrodiconiferyl alcohol-4-O-glucoside	Lignans and Coumarins	-	476454	147393	143825	111891	105686	93200.4	3.57062e+06	4.23262e+06	4.23501e+06	5.53041e+06	8.22334e+06	7.52172e+06	-	-
pme0075	C7H11NO5	N-Acetyl-L-glutamic acid	Amino acids and derivatives	1188-37-0	339424	574319	381203	313966	359489	413423	704394	538959	409880	308988	303138	331686	C00624	ko00220,ko01100,ko01110,ko01210,ko01230
MWSmce039	C6H5NO2	Isonicotinic acid	Others	55-22-1	3.79656e+06	3.78054e+06	3.45501e+06	3.68266e+06	3.69279e+06	3.39553e+06	7.75091e+06	3.78466e+06	8.63669e+06	1.75849e+06	4.43542e+06	5.38309e+06	C07446	-
pme2566	C8H14N2O5	5-L-Glutamyl-L-amino acid	Amino acids and derivatives	5875-41-2	160309	148144	160498	71195.2	108320	92633.1	136115	171616	126007	73671.4	69909	74103.7	-	-
Zmyn000453	C6H8O7	Isocitric Acid	Organic acids	320-77-4	1.636e+06	2.73885e+06	2.95316e+06	4.70705e+06	3.64741e+06	3.92201e+06	1.42829e+06	895629	1.17129e+06	808275	1.36472e+06	1.52364e+06	C00311	ko00020,ko00630,ko01100,ko01110,ko01200,ko01210,ko01230,ko01240
MWStz073	C4H7NO2	5-Hydroxy-2-pyrrolidinone	Alkaloids	62312-55-4	989687	1.45004e+06	1.23141e+06	1.28096e+06	1.21649e+06	1.1762e+06	1.32414e+06	1.31213e+06	1.28727e+06	1.38258e+06	1.33049e+06	1.33549e+06	-	-
Zaln004057	C16H16O8	4-caffeoylshikimic acid	Phenolic acids	-	137268	564326	191810	121952	42911.3	50074.1	1.77601e+06	1.63082e+06	1.21066e+06	264335	688280	705374	-	-
pmn001375	C26H32O12	1-Hydroxypinoresinol-1-O-Glucoside	Lignans and Coumarins	81495-71-8	157695	93462.7	75826.9	106376	43990.7	102736	3.07472e+06	3.49434e+06	2.65193e+06	3.19705e+06	3.33238e+06	2.77235e+06	-	-
pme3961	C10H13N5O3	2'-Deoxyadenosine	Nucleotides and derivatives	958-09-8	798549	1.21856e+06	1.20985e+06	2.75903e+06	4.02137e+06	3.02653e+06	6.911e+06	5.32074e+06	4.41611e+06	5.7104e+06	5.67137e+06	5.95972e+06	C00559	ko00230,ko01100,ko01232,ko02010
MWS201398	C8H14N2O5	Hyp-Ser	Amino acids and derivatives	-	180166	212765	242420	363034	397152	330427	218273	156137	145387	61391.6	101027	113032	-	-
MWS201464	C15H23N3O3	Lys-Phe	Amino acids and derivatives	6235-35-4	153804	194126	221298	261657	239249	214599	56698.4	44208.7	85013.2	91583.9	128214	136841	-	-
Lchp000218	C11H12O4	(R)-3-ethyl-7-hydroxy-6-methoxyphthalide	Others	-	3.08672e+06	2.84001e+06	2.38828e+06	960859	901981	1.13247e+06	4.4456e+06	3.99328e+06	4.17616e+06	2.81859e+06	4.11056e+06	4.89799e+06	-	-
mws0254	C6H9N3O2	L-Histidine	Amino acids and derivatives	71-00-1	1.23828e+07	1.74601e+07	1.11182e+07	5.88955e+06	4.28043e+06	6.65271e+06	9.49321e+06	4.38861e+06	7.37187e+06	1.23613e+06	2.2706e+06	1.57131e+06	C00135	ko00340,ko00410,ko00470,ko00970,ko01100,ko01110,ko01230,ko02010
Zmyn005026	C18H36O2	16-Methylheptadecanoic acid	Lipids	2724-58-5	1.06785e+08	6.14635e+07	8.50883e+07	7.36171e+07	8.35625e+07	8.08621e+07	6.99805e+07	4.67097e+07	3.76374e+07	5.24499e+07	3.23339e+07	4.14464e+07	C20356	-
mws1626	C15H18O2	Dehydrocostuslactone	Terpenoids	477-43-0	170212	94160.1	81504.8	72797.1	68061	69163.2	382826	430593	488825	145207	232386	218000	C09387	-
YC512118	C18H35NO	Oleamide (9-Octadecenamide)	Lipids	301-02-0	36145.1	27493.2	32683.7	52500.8	46937.9	87504.9	16094	16192.3	14560.7	7360.63	7305.31	7032.67	C19670	-
pmn001669	C12H14O5	Methyl sinapate	Phenolic acids	20733-94-2	9	9	9	9	9	9	117745	57144.3	157167	47112.2	77251.8	105101	-	-
pme0181	C7H11N3O2	3-Methyl-L-Histidine	Amino acids and derivatives	368-16-1	459913	593957	580178	612218	546281	500333	593817	631194	638212	602768	649476	715321	C01152	ko00340,ko01100
MWS0933	C7H11N3O2	1-Methylhistidine	Amino acids and derivatives	332-80-9	459913	593957	580178	612218	546281	500333	593817	631194	638212	602768	649476	715321	-	-
MWSmce394	C30H48O5	2,3,19-Trihydroxyurs-12-en-28-oic acid (Tormentic acid)	Terpenoids	13850-16-3	95085	118172	313553	230450	350162	302505	1.59187e+07	1.69243e+07	1.84708e+07	1.1048e+07	1.49999e+07	1.57072e+07	-	-
mws2118	C21H24O10	Phloretin-2'-O-glucoside (Phlorizin)	Flavonoids	60-81-1	20398.5	31079.6	22666.3	9	9	9	871370	22222.3	35453.6	14609.9	10180.1	13167.1	C01604	ko00941,ko01110
mws0629	C13H16N2O5	L-Aspartyl-L-Phenylalanine	Amino acids and derivatives	13433-09-5	543773	759956	2.06063e+06	6.23659e+06	5.58638e+06	4.27365e+06	2.52896e+06	2.75838e+06	2.53166e+06	279537	447994	238917	-	-
MWSmce315	C7H5NS2	2-Mercaptobenzothiazole	Alkaloids	149-30-4	40355.8	44094.3	23216.6	30204.4	26537.8	27863.4	27845.3	27378.6	28682.7	36142.5	26320.8	28246.6	C14437	-
pme1228	C11H12N2O3	5-Hydroxy-L-tryptophan	Amino acids and derivatives	56-69-9	144287	371541	199939	114771	78811.8	85286.8	499788	396908	371472	146175	240192	258016	C00643	ko00380,ko01100
Lmbn009444	C18H34O3	Ricinoleic acid	Lipids	141-22-0	1.44035e+06	647082	1.44329e+06	1.69508e+06	2.49558e+06	774523	165118	167829	143828	82987.8	181858	206206	C08365	-
Zmyn000110	C6H14NO8P	D-Glucosamine 1-phosphate	Others	2152-75-2	35302.6	67019.8	70373.7	67587	39037.5	43669.5	46674.1	66570.2	72580.8	36817.7	60644.7	52205.3	C06156	ko00520,ko01100,ko01250
MWS4309	C13H15N3O3	Glycyl-tryptophan	Amino acids and derivatives	2390-74-1	535269	457422	521093	518991	505011	464466	251733	166782	204254	82389	169311	119139	-	-
mws0359	C15H30O2	Pentadecanoic Acid	Lipids	1002-84-2	1.158e+06	1.16604e+06	1.02353e+06	743334	834903	710849	4.92645e+06	5.55288e+06	3.98126e+06	1.60605e+06	2.32898e+06	2.2878e+06	C16537	-
pmb0998	C10H14N5O8P	Guanosine 5'-monophosphate	Nucleotides and derivatives	85-32-5	2.46217e+06	1.75609e+06	2.08944e+06	2.06277e+06	3.83501e+06	2.1255e+06	1.2402e+06	784892	351830	315228	556585	644695	C00144	ko00230,ko01100,ko01232
mws1164	C6H12O6	D-Fructose	Others	57-48-7	2.70808e+06	2.58933e+06	2.71474e+06	2.63556e+06	2.41052e+06	2.66629e+06	2.42056e+06	2.37999e+06	2.41378e+06	2.45034e+06	2.4999e+06	2.17397e+06	C05003	-
MWS1771	C10H13NO3	L-Tyrosine methyl ester	Amino acids and derivatives	1080-06-4	429475	549368	631445	299432	313670	275097	106524	100883	140197	96049.3	111169	189155	C03404	-
pme0040	C5H5N5	Adenine	Nucleotides and derivatives	73-24-5	1.71812e+07	7.07442e+06	9.00678e+06	6.14983e+06	5.75041e+06	6.34798e+06	3.86924e+07	3.01797e+07	3.24084e+07	2.67356e+07	2.15134e+07	2.55734e+07	C00147	ko00230,ko00908,ko01100,ko01110,ko01232
Hmyp002656	C11H11NO4	Methyl dioxindole-3-acetate	Alkaloids	57061-18-4	3.99935e+06	3.79886e+06	2.44524e+06	3.80646e+06	3.15022e+06	3.5969e+06	1.19927e+06	1.16334e+06	1.14825e+06	1.17614e+06	871638	285281	-	-
Jmzn006005	C10H10O3	3,4-Methylenedioxy cinnamyl alcohol	Lignans and Coumarins	58095-76-4	168606	123545	47074.7	31585.1	33371.3	36835.7	551502	508387	1.36662e+06	84885.6	135302	239670	-	-
Lmhp009129	C23H48NO7P	LysoPC 15:0(2n isomer)	Lipids	-	1.34462e+06	3.22139e+06	2.11336e+06	680558	867091	947225	1.17091e+06	1.72179e+06	1.09036e+06	673871	735026	973722	-	-
Zblp002839	C9H10O3	3-(3-Hydroxyphenyl)-propionic acid	Phenolic acids	621-54-5	2.56173e+06	3.82663e+06	2.90797e+06	612961	826150	871293	279781	398634	398467	314364	220615	151044	C11457	ko00360,ko01100
Zmdn006057	C22H22O10	Physcion-1-O-glucoside	Quinones	23451-01-6	11249.9	16630.2	10737.6	2997.02	11860.6	9887.41	357451	421660	259423	498159	282733	347907	-	-
MWSslk208	C20H30O2	Kaurenoic Acid	Terpenoids	6730-83-2	407839	71902.9	55505.3	9	9	9	1.08875e+06	1.03129e+06	1.0944e+06	280973	285727	242510	C11874	ko00904,ko01100,ko01110
pme2380	C5H6O5	α-Ketoglutaric acid	Organic acids	328-50-7	3.67169e+07	6.10104e+06	1.2516e+07	8.69408e+06	9.99385e+06	8.67815e+06	736783	2.00434e+06	2.12165e+06	856600	480650	331889	C00026	ko00020,ko00040,ko00053,ko00220,ko00250,ko00300,ko00310,ko00340,ko00430,ko00470,ko00630,ko00650,ko00660,ko01100,ko01110,ko01200,ko01210,ko01230,ko01240
MWS201478	C12H16N2O4	Phe-Ser	Amino acids and derivatives	16053-39-7	649912	690644	957178	1.39751e+06	1.55132e+06	1.31128e+06	328631	294180	214009	133408	230993	221247	-	-
MWS201414	C9H15N3O4	Pro-Asn	Amino acids and derivatives	107856-82-6	1.48558e+06	1.15481e+06	965214	961803	1.0775e+06	1.23333e+06	1.19213e+06	1.05153e+06	1.13971e+06	518072	1.10711e+06	1.2164e+06	-	-
MWS20645	C11H14N2O4	Gly-Tyr	Amino acids and derivatives	658-79-7	727998	779943	1.10504e+06	1.10975e+06	1.08342e+06	1.0068e+06	240107	256849	276850	87843.1	149860	175768	-	-
pme2996	C9H6O3	4-Hydroxycoumarin	Lignans and Coumarins	1076-38-6	12714.5	6209.32	5974.18	10412.2	5519.06	4911.14	103840	114721	274646	192219	202903	180319	C20414	-
MWS0811	C6H11NO2	L-Pipecolic Acid	Organic acids	3105-95-1	7.50262e+06	2.41447e+06	2.29799e+06	1.83276e+06	1.83331e+06	2.11444e+06	3.93564e+07	1.77579e+07	3.51889e+07	1.23325e+07	2.71133e+07	2.56895e+07	C00408	ko00310,ko00960,ko01100,ko01110
ML10181668	C6H11NO2	Cycloleucine	Amino acids and derivatives	52-52-8	4.49124e+06	8.72391e+06	8.88057e+06	1.26894e+07	5.32075e+06	1.36071e+07	1.53135e+08	7.12204e+07	1.00731e+08	3.12153e+07	6.39935e+07	6.53973e+07	C03969	-
mws0145	C8H8O3	O-Anisic acid (2-Methoxybenzoic acid)	Phenolic acids	529-75-9	6262.8	9495.96	9746.94	11115.8	23448.8	25722.3	178770	168980	198179	190423	138163	141311	-	-
Cmyn001328	C15H16O9	Daphnin	Lignans and Coumarins	486-55-5	34505.9	58836.8	51681.3	11668.2	22592.4	21860.1	169909	225071	201758	124394	199543	107499	C01421	-
Hmsp003093	C9H6O4	3,7-Dihydroxychromen-4-one	Others	-	316998	313323	318494	211031	169046	156644	5.03617e+06	4.62883e+06	3.7961e+06	5.80763e+06	4.67536e+06	3.90076e+06	-	-
MWS1900	C11H20O4	Undecanedioic acid	Lipids	1852-04-6	120733	150730	153419	211469	278752	245780	75170.4	82089.8	153253	87227	89231.2	66806.7	-	-
MWSmce706	C5H8N2O2	Cyclo(Ala-Gly)	Amino acids and derivatives	4526-77-6	9.65946e+06	1.00247e+07	1.14726e+07	1.60583e+07	1.49521e+07	1.20218e+07	9.44235e+06	8.60294e+06	1.08792e+07	1.26561e+07	1.30983e+07	1.22515e+07	-	-
Lmbp010382	C18H16O3	6-Methoxy-2-(2-phenylethyl)chromone	Others	84294-89-3	48838.4	35711.8	36460.9	26787.9	24939	33236.6	17941.8	27116.5	27134	27852.7	43212.1	48731.9	-	-
Lmcn002982	C9H10O5	Methyl 3-O-Methyl Gallate	Phenolic acids	3934-86-9	122943	132594	125500	27856.6	37068	36783.9	63708.1	54245.2	51005.9	48995.9	71091.3	57282.7	-	-
Lmhp011562	C21H36O4	1-α-Linolenoyl-glycerol	Lipids	-	1.42522e+07	1.16427e+07	1.20495e+07	9.97984e+06	1.18327e+07	1.26558e+07	1.14877e+06	1.06626e+06	1.43053e+06	516017	555820	572901	-	-
pmb0530	C21H27N7O14P2	Nicotinic acid adenine dinucleotide	Nucleotides and derivatives	53-84-9	4.68916e+06	6.44345e+06	4.93035e+06	2.68372e+06	2.22914e+06	3.55698e+06	1.15138e+06	1.04119e+06	1.03552e+06	415385	856232	1.3823e+06	C00003	ko00190,ko00730,ko00760,ko01100,ko01240
mws0282	C11H12N2O2	L-Tryptophan	Amino acids and derivatives	73-22-3	3.24971e+07	22425286	1.6198e+07	9.88064e+06	6.99429e+06	8.91269e+06	2.71507e+07	2.03628e+07	2.03759e+07	5.91783e+06	9.62754e+06	1.05732e+07	C00078	ko00260,ko00380,ko00400,ko00901,ko00966,ko00970,ko01100,ko01110,ko01210,ko01230,ko01240
Smcn001947	C29H36O15	Acteoside; Verbascoside	Phenolic acids	61276-17-3	9	5.09602e+06	49549.2	9	9	9	1.13571e+06	917209	847794	2.28883e+06	571387	1.93556e+06	C10501	-
Lmbn001288	C5H8O4	2-Hydroxy-2-methyl-3-oxobutanoic acid	Organic acids	71698-08-3	42820.1	27791.8	28639.3	29400.7	20446.8	25642.5	100163	95075.2	107379	113163	190668	203716	C06010	ko00290,ko00650,ko00660,ko00770,ko01100,ko01110,ko01210,ko01230
Zmdn001564	C14H18N2O5	γ-Glutamylphenylalanine	Amino acids and derivatives	7432-24-8	1.43244e+06	1.05709e+06	716440	623816	629750	697398	489360	421944	471386	269926	351165	357056	-	-
mws1060	C10H12N4O5	9-(Arabinosyl)hypoxanthine	Nucleotides and derivatives	7013-16-3	1.6367e+06	9.30649e+06	5.70445e+06	1.3208e+07	1.03489e+07	1.04307e+07	1.19382e+07	7.17527e+06	1.16003e+07	5.76595e+06	1.3533e+07	1.89552e+07	-	-
pmn001419	C15H18O8	1-O-p-Coumaroyl-β-D-glucose	Phenolic acids	7139-64-2	18101.5	27506.9	32085.9	21950.5	16373.4	23515.8	2.5222e+06	2.08808e+06	3.19334e+06	854762	1.72007e+06	1.98772e+06	C16827	-
mws1080	C12H22O11	Galactinol	Others	3687-64-7	5.5571e+06	528658	667957	459037	242261	504285	1.93557e+07	2.03857e+07	1.18116e+07	1.15575e+07	7.63474e+06	8.39116e+06	C01235	ko00052,ko01100
Lmqn000213	C24H42O21	Stachyose	Others	470-55-3	5397.77	12737.5	19222.1	11250.6	6672.7	14450.8	3.25567e+06	4.82192e+06	1.64448e+06	1.46609e+06	1.50771e+06	1.41976e+06	C01613	ko00052,ko01100
mws0866	C6H13O9P	D-Glucose 6-phosphate	Others	56-73-5	3.50512e+06	6.3142e+06	4.4461e+06	1.34528e+07	1.2822e+07	1.32275e+07	4.53058e+06	4.39524e+06	4.76074e+06	1.97954e+06	3.50303e+06	3.11451e+06	C00092	ko00500,ko00562,ko01100,ko01110
HJKP000649	C8H9NO	N-benzylformamide	Alkaloids	6343-54-0	1.71505e+06	1.04578e+06	975345	562766	432639	624183	860697	523911	840457	317974	767982	845369	C15561	-
mws0028	C8H8O4	Vanillic acid	Phenolic acids	121-34-6	126254	78813.4	86684.7	173727	146246	148728	680306	623033	440250	737654	808461	621685	C06672	-
Lmtn003598	C18H24O8	3-Prenyl-4-O-glucosyloxy-4-hydroxybenzoic acid	Phenolic acids	-	18170.5	16820.9	13176.8	13344.8	9524.17	25534.3	777929	457653	733865	407306	349056	295953	-	-
Lmxn010778	C21H28O5	Candelabrone 12-methyl ether	Terpenoids	-	4637.48	4895.54	239367	266625	774558	139212	4.71891e+07	3.79251e+07	4.14575e+07	1.12682e+07	7.65526e+06	8.736e+06	-	-
pme2679	C6H13NO2	L-Allo-isoleucine	Amino acids and derivatives	1509-34-8	2.20504e+06	1.59431e+06	1.11578e+06	423320	438722	668778	1.13112e+06	870557	690276	325996	1.46197e+06	1.59438e+06	C21096	-
Lmsn002247	C13H16O8	1-O-Salicyloyl-β-D-glucose	Phenolic acids	60517-74-0	175524	590787	825165	107947	126580	109649	557231	617304	766094	818688	1.91066e+06	1.84893e+06	-	-
Lmhp001732	C14H18N2O3	L-Prolyl-L-Phenylalanine	Amino acids and derivatives	13589-02-1	101510	186108	118347	108692	113835	100294	89833.3	54999.5	98330.1	40783.6	76508.4	30712.1	-	-
pme0278	C7H14N2O4	2,6-Diaminooimelic acid	Organic acids	583-93-7	358261	402902	299177	320160	324471	232133	1.40864e+06	1.06437e+06	1.22921e+06	277069	807437	1.04556e+06	C00666	ko00300,ko00470,ko01100,ko01110,ko01230
Zmdp000376	C5H11N3O	4-Guanidinobutanal	Others	-	1.15833e+07	9.81241e+06	8.82106e+06	1.38756e+07	1.04749e+07	1.36849e+07	1.56265e+08	1.00126e+08	9.77209e+07	3.04694e+07	6.14779e+07	6.43043e+07	-	-
pme0490	C6H5NO2	Nicotinic acid (Vitamin B3)	Others	59-67-6	5.03469e+06	3.42228e+06	4.2449e+06	3.62256e+06	2.9712e+06	3.43458e+06	5.18788e+06	3.41262e+06	6.12895e+06	2.52183e+06	3.44219e+06	4.26564e+06	C00253	ko00760,ko00960,ko01100,ko01110,ko01240
Lhdp102526	C30H48O4	19-Hydroxyursolic acid	Terpenoids	-	7412.08	6730.81	6083.58	17321.6	24084.9	19491.7	518892	651852	606598	181210	208879	273975	-	-
MWSmce585	C4H9NO2	Methyl 3-aminopropanoate	Amino acids and derivatives	4138-35-6	1.0503e+07	9.19215e+06	9.68893e+06	9.43708e+06	8.36111e+06	8.93222e+06	5.2497e+06	4.90503e+06	5.29503e+06	3.0536e+06	3.89406e+06	4.02412e+06	-	-
NK10253223	C8H9NO3	2-Amino-3-methoxybenzoic acid	Phenolic acids	3177-80-8	706250	714786	886979	734306	721565	688124	586954	516538	578973	232640	605520	805644	C05831	ko00380
MWS1855	C6H8N2	2,5-Dimethyl pyrazine	Alkaloids	123-32-0	97278.7	107742	222162	53027.8	68303.8	60406.5	660824	966946	783044	344583	616707	502330	-	-
Zmzn000113	C5H9NO4	L-threo-3-Methylaspartate	Amino acids and derivatives	6061-13-8	613788	872326	803323	753744	740339	709403	1.62432e+06	911977	755433	250169	465610	457271	C03618	ko00630,ko00660,ko01100,ko01200
Wbtn012389	C20H20O6	1,6-dihydroxy-3,5-dimethoxy-2-(3-methylbut-2-en-1-yl)xanthen-9-one	Flavonoids	-	70172.2	57167	52606.2	54939.4	63246.4	44540.2	1.63223e+06	2.12339e+06	2.18155e+06	1.31488e+06	985091	635592	-	-
pmn001610	C20H36O2	Eicosadienoic acid	Lipids	5598-38-9	2.50572e+06	7.96064e+06	5.28459e+06	7.27403e+06	6.17084e+06	5.98748e+06	4.357e+06	2.95488e+06	3.50775e+06	1.16908e+06	2.75114e+06	3.67795e+06	C16525	ko01040
pmb0874	C23H44NO7P	LysoPE 18:2(2n isomer)	Lipids	-	565785	2.12725e+06	1.14683e+06	949740	710225	1.30403e+06	1.07798e+07	5.95827e+06	6.00393e+06	3.2089e+06	6.16897e+06	8.17924e+06	-	-
mws0924	C6H10O4	2-Methylglutaric acid	Organic acids	617-62-9	85714.5	27620.5	44624.9	70618.2	1.76829e+06	1.74023e+06	1.11472e+06	790315	1.26239e+06	474003	1.15193e+06	1.48701e+06	-	-
mws0208	C6H10O4	Adipic Acid	Organic acids	124-04-9	85714.5	27620.5	44624.9	70618.2	1.76829e+06	1.74023e+06	1.11472e+06	790315	1.26239e+06	474003	1.15193e+06	1.48701e+06	C06104	ko01100
pme0014	C5H9NO4	L-Glutamic acid	Amino acids and derivatives	56-86-0	887706	1.46392e+06	1.68388e+06	1.07854e+06	1.18179e+06	1.16856e+06	2.26902e+06	1.44157e+06	1.31852e+06	509454	806050	794615	C00025	ko00220,ko00250,ko00330,ko00340,ko00430,ko00470,ko00480,ko00630,ko00650,ko00660,ko00860,ko00910,ko00970,ko01100,ko01110,ko01200,ko01210,ko01230,ko01240,ko02010
Lmbn005662	C18H32O3	9(10)-EpOME;(9R,10S)-(12Z)-9,10-Epoxyoctadecenoic acid	Lipids	16833-56-0	244129	138279	219799	251905	332713	319225	21925.1	21460.8	21136.4	14113.5	13120.8	14873	C14825	ko00591,ko01100
pme3033	C4H9NO2	N,N-Dimethylglycine	Amino acids and derivatives	1118-68-9	2.03819e+07	1.6685e+07	1.90096e+07	1.71841e+07	1.50455e+07	1.57473e+07	9.35718e+06	9.35069e+06	1.00968e+07	5.59376e+06	7.8209e+06	7.33877e+06	C01026	ko00260,ko01100
pmn001435	C42H68O15	Prunellin A	Terpenoids	-	113632	7152.17	28207.4	260321	373259	315858	1.62955e+06	1.80725e+06	1.46553e+06	969457	1.75365e+06	1.28758e+06	-	-
MWSmce331	C4H7NO2	Azetidine-2-carboxylic acid	Alkaloids	2517-04-6	768710	1.25769e+06	1.21528e+06	853420	920170	832285	2.34079e+06	1.94023e+06	1.63664e+06	642445	968570	545886	C08267	-
mws0264	C12H22O11	D-Trehalose	Others	99-20-7	1.49634e+06	162500	96689.5	162529	87106.2	105715	5.64087e+06	5.96222e+06	3.44888e+06	3.82527e+06	2.20292e+06	2.27323e+06	C01083	ko00500,ko01100,ko01110,ko02010
Zmgp005593	C19H18O2	5-hydroxy-1,7-diphenyl-4,6-diene-3-heptanone	Others	-	3.36232e+06	3.15778e+06	2.53828e+06	2.01191e+06	2.28141e+06	2.5895e+06	7862.37	8494.62	12885.5	1685.08	6716.67	2377.97	-	-
pmb0790	C20H31NO13	Pyridoxine-5'-O-diglucoside	Others	-	3.33228e+06	5.33403e+06	4765878	4.07182e+06	4.05519e+06	4.68127e+06	55364.5	45332.2	72431.9	7316.15	29321	44896.7	-	-
Lmbn001181	C22H28O15	Fraxetin-7,8-di-O-glucoside	Lignans and Coumarins	-	2.36041e+06	2.88849e+06	4.29318e+06	1.95135e+06	2.49284e+06	2.43391e+06	2.04917e+07	2.32857e+07	2.43036e+07	1.52731e+07	1.26508e+07	9.61123e+06	-	-
mws0636	C18H20N2O3	L-Phenylalanyl-L-phenylalanine	Amino acids and derivatives	2577-40-4	53736	43827.9	35479.6	85780.5	80868.9	81178.3	107073	73886.2	77170	23346.3	74514	143501	-	-
Ymjm000095	C30H46O2	13,28-Epoxyolean-11-en-3-one	Terpenoids	-	11890.5	65693.9	26174.9	20600	19968.8	24702.9	1.62345e+06	1.43173e+06	1.84661e+06	1.60967e+06	1.2425e+06	1.60131e+06	-	-
Zmln000899	C15H20O9	Syringaldehyde-4-O-glucoside	Phenolic acids	-	162061	276786	363133	311496	264620	314539	3.04418e+06	2.5929e+06	3.60666e+06	4.52514e+06	4.43794e+06	5.401e+06	-	-
mws1389	C30H48O3	3-Hydroxyolean-12-en-28-oic acid (Oleanolic acid)	Terpenoids	508-02-1	18427.2	260274	86042.9	66029.1	63989.1	72245.1	1.05678e+07	1.01578e+07	9.89549e+06	1.13537e+07	1.38099e+07	1.31064e+07	C17148	-
mws0371	C22H32O2	Cis-4,7,10,13,16,19-Docosahexaenoic Acid	Lipids	6217-54-5	40040.3	79049.4	78668	101585	68344.1	75209	144408	131886	120998	116665	182145	239191	C06429	ko01040
pma1751	C12H15NO7	N-(beta-D-Glucosyl)nicotinate	Others	-	244369	141426	230025	348035	208823	282293	6.91414e+06	2.76424e+06	4.25138e+06	669936	1.99729e+06	2.58282e+06	-	-
pme0010	C3H7NO3	L-Serine	Amino acids and derivatives	56-45-1	81843.2	83269.5	91967.1	105571	97846.4	94843.3	44443	55498.4	44416	23031.3	41802.6	50358.6	C00065	ko00260,ko00261,ko00270,ko00460,ko00470,ko00564,ko00600,ko00630,ko00920,ko00970,ko01100,ko01110,ko01200,ko01230,ko01240,ko02010
Lmrn001951	C9H10O4	(S)-2-Hydroxy-3-(4-Hydroxyphenyl)Propanoic Acid	Phenolic acids	23508-35-2	88824.1	3737.94	84264.3	50685.9	42656.8	76719.8	4.45027e+07	4.17295e+07	3.87659e+07	5.64298e+07	63863818	6.21844e+07	-	-
pme0282	C8H6O4	Phthalic acid	Phenolic acids	88-99-3	88823.9	87979.3	63415	44343.1	38204	33064.6	473077	345424	550348	215422	408140	466224	C01606	ko01100,ko02010
MWS1844	C14H18O	2-Pentyl-3-phenyl-2-propenal	Others	122-40-7	648683	653984	721700	657388	552971	756656	574940	557724	514039	595546	453324	389801	C12288	-
MWS201412	C10H19N3O5	Lys-Asp	Amino acids and derivatives	20556-18-7	322353	377218	379638	608922	676735	663183	678332	513396	474190	152970	267847	313565	-	-
mws1090	C6H13O9P	Glucose-1-phosphate	Others	59-56-3	3.19938e+06	5.5638e+06	4.44736e+06	1.25738e+07	1.1636e+07	1.03212e+07	3.90876e+06	4.26788e+06	3.94074e+06	1.63062e+06	2.8468e+06	2.43073e+06	C00103	ko00010,ko00040,ko00052,ko00500,ko00520,ko00561,ko01100,ko01110,ko01240,ko01250
MWS201483	C14H18N2O4	Phe-Hyp	Amino acids and derivatives	90965-82-5	27577.5	27429.8	33519.6	37570	34682.4	29173.6	52923	42680.6	46209.3	13591.9	50549.2	33748.6	-	-
Lmbn005923	C18H30O2	Crepenynic acid	Lipids	2277-31-8	1.03847e+07	1.06116e+07	9.46677e+06	9.58238e+06	9.42209e+06	9.8447e+06	1.05987e+06	1.25991e+06	1.08785e+06	279940	717112	899128	C07289	ko00591
pme3443	C11H12O4	Sinapinaldehyde	Phenolic acids	4206-58-0	400769	246202	272409	211009	196517	191164	1.60492e+06	1.8667e+06	1.34236e+06	2.69004e+06	1.04866e+06	817328	C05610	ko00940,ko01100,ko01110
MWSmce265	C14H14O4	Decursinol	Lignans and Coumarins	23458-02-8	177459	148928	100870	90207.1	88968.9	88973.1	234625	252926	255180	160395	243558	190770	C09259	-
pme0006	C5H9NO2	L-Proline	Amino acids and derivatives	147-85-3	4.47541e+06	2.62138e+06	2.20281e+06	1.85391e+06	1.25994e+06	1.38607e+06	2.68571e+06	1.28639e+06	2.2699e+06	476222	3.76443e+06	5.27647e+06	C00148	ko00330,ko00470,ko00970,ko01100,ko01110,ko01230,ko02010
pme3096	C3H5NO4	Aminomalonic acid	Organic acids	1068-84-4	669600	335831	419434	938277	1.23992e+06	1.28847e+06	2.62271e+06	1.46265e+06	2.00463e+06	1.96374e+06	2.86773e+06	3.69981e+06	C00872	-
mws5042	C11H14N2O3	L-Glycyl-L-phenylalanine	Amino acids and derivatives	721-66-4	594550	514016	1.23324e+06	1.09037e+06	1.38405e+06	1.27028e+06	1.23324e+06	675089	947612	227588	413721	315347	-	-
pmb2319	C23H48NO7P	LysoPC 15:0	Lipids	108273-89-8	1.14616e+06	2.6179e+06	1.74864e+06	547582	789175	708706	757893	1.31723e+06	954810	481037	474910	527222	-	-
Lmbn005443	C18H30O3	13-KODE; (9Z,11E)-13-Oxooctadeca-9,11-dienoic acid	Lipids	54739-30-9	150692	121591	552366	199013	226371	215770	12979.3	16396.6	9985.88	7723.15	8580.19	6213.88	C14765	ko00591
mws1491	C18H32O2	Linoleic acid	Lipids	60-33-3	15854.4	18558.7	8125.17	16458.8	17777.9	16958.3	3612.53	5242.34	4393.09	2363.6	5021.99	5144.54	C01595	ko00591,ko01040,ko01100
Lmhp011388	C21H36O4	2-α-Linolenoyl-glycerol	Lipids	55268-58-1	3.76568e+06	2.86655e+06	3.90896e+06	2.67253e+06	4.77833e+06	5.74437e+06	3.66334e+06	3.1801e+06	3.44635e+06	1.21809e+06	2.21862e+06	1.8981e+06	-	-
mws0251	C5H6N2O2	Thymine	Nucleotides and derivatives	65-71-4	320009	191553	153029	180077	185898	210289	821043	826136	1.03853e+06	1.34493e+06	758250	763052	C00178	ko00240,ko01100,ko01232
Yshs000050	C30H46O3	Lupane-20(29)-en-3-on-28-oic acid	Terpenoids	-	616202	576908	638705	718269	734296	700644	248885	193935	248738	219583	137643	130930	-	-
mws0566	C7H8O2	4-Methylcatechol	Phenolic acids	452-86-8	3132.97	4555.85	8390.88	6552.29	2781.37	4095.5	266064	203190	263917	312522	304950	277667	C06730	ko01100
Lmhp010757	C25H48NO7P	LysoPE 20:2	Lipids	-	13137.1	37901.3	9461.61	42371.9	31327.6	32674.5	274192	237345	288461	126433	223748	214038	-	-
Lmhp009682	C30H52NO7P	LysoPC 22:5(2n isomer)	Lipids	-	24337.9	102329	126643	72411.4	76320.2	134285	1.22347e+06	768995	1.03281e+06	101500	270853	189132	-	-
pmb0484	C5H14NO+	Choline	Alkaloids	62-49-7	930954	883733	1.00759e+06	903353	919641	898842	469139	530407	506545	259706	444166	373251	C00114	ko00260,ko00564,ko01100,ko02010
Lmbn005287	C18H32O4	7S,8S-DiHODE; (9Z,12Z)-(7S,8S)-Dihydroxyoctadeca-9,12-dienoic acid	Lipids	143288-65-7	4.11302e+06	7.42502e+06	5.88715e+06	1.66904e+07	1.56788e+07	2.03583e+07	395180	417114	377765	326326	371570	290373	C07354	ko00591
Hmlp000935	C8H11NO2	Vanillylamine	Alkaloids	1196-92-5	90329.7	116966	112412	168067	94824.7	89081.8	315293	229650	290461	210483	204124	222730	C16666	ko01100,ko01110
Hmcp003783	C13H10N2O	1-Acetyl-β-carboline	Alkaloids	-	19976.8	17751	14941.9	9942.83	10981.8	15399.5	54995.9	38492.3	59526.4	53324.4	39622.4	31319.4	-	-
Ymjm000154	C13H18O7	Salicin	Phenolic acids	138-52-3	65646.6	269886	210176	57599.6	36936.7	70194	506696	598369	479444	1.18606e+06	521134	500003	C01451	ko00010
pmf0440	C10H10O2	4-MethoxycinnaMaldehyde	Phenolic acids	1963-36-6	1.52529e+06	1.28837e+06	1.05832e+06	1.37011e+06	1.20209e+06	1.44996e+06	2.42049e+06	2.08344e+06	2.77744e+06	2.75701e+06	3.55511e+06	3.37471e+06	C10475	-
MWS20172	C6H6O3	5-Hydroxymethylfurfural	Others	67-47-0	1.34316e+06	898923	1.07857e+06	1.13042e+06	1.18006e+06	1.21596e+06	352131	249935	506184	412893	272465	279748	C11101	-
Lmsn004970	C24H24O12	3,6-Di-O-caffeoyl glucose	Phenolic acids	-	154642	109237	81535.9	129577	79661	114747	1.21049e+06	1.22869e+06	1.18791e+06	481101	660598	856372	-	-
MWSCX017	C9H8O3	4-hydroxyphenyl acrylaldehyde	Others	-	261560	153215	145821	31688.9	120245	32439.4	2.52554e+06	2.37474e+06	3.11101e+06	2.91292e+06	3.85221e+06	3.56515e+06	-	-
pme3968	C6H7N5O	7-Methylguanine	Nucleotides and derivatives	578-76-7	3.16663e+06	5.64265e+06	3.80359e+06	1.27381e+06	1.15737e+06	1.42052e+06	5.40977e+06	5.18312e+06	4.93564e+06	3.95904e+06	3.80066e+06	3.34827e+06	C02242	-
pme1178	C10H13N5O5	Guanosine	Nucleotides and derivatives	118-00-3	1.27322e+07	2.0305e+07	2.6047e+07	3.17014e+07	2.47259e+07	2.83264e+07	7.45392e+07	4.32803e+07	6.60343e+07	1.08007e+07	5.00707e+07	8.06071e+07	C00387	ko00230,ko01100,ko01232,ko02010
Lmhp009368	C30H50NO7P	LysoPC 22:6	Lipids	-	13974.1	104827	271425	152099	147556	224931	1.64714e+06	1.38366e+06	2.30655e+06	202349	327482	279955	-	-
Lmsn003318	C16H20O9	1-O-Feruloyl-β-D-glucose	Phenolic acids	7196-71-6	8711.88	113569	190363	25451.4	43729.1	54188.7	1.65962e+07	1.34822e+07	1.89017e+07	3.96803e+06	1.40875e+07	9	C17759	-
MWS00327g	C3H7NO3	L-Isoserine	Amino acids and derivatives	632-13-3	1.11119e+06	1.39807e+06	1.42202e+06	1.32382e+06	1.26429e+06	1.21717e+06	723502	657274	725618	277572	463649	427609	-	-
MWS2413	C5H9NO3	N-acetyl-beta-alanine	Amino acids and derivatives	3025-95-4	122844	200834	151435	60908.8	76414.6	71938.1	42078.9	39711	35963	31324.3	41148.6	46807	C01073	ko00410
pme0183	C5H5N5O	Isoguanine	Nucleotides and derivatives	3373-53-3	4.12671e+06	2.68718e+06	2.54752e+06	3.12449e+06	3.43222e+06	2.97704e+06	2.84957e+07	2.19571e+07	2.50304e+07	1.66281e+07	1.80123e+07	2.00403e+07	-	-
MWS1848	C8H8O2	Phenyl acetate	Phenolic acids	122-79-2	109208	85810.2	114689	172089	168450	135468	636036	652744	755719	1.28643e+06	1.67912e+06	1.87592e+06	C00548	-
Lmhp009590	C25H50NO7P	LysoPC 17:1	Lipids	-	651445	1.4822e+06	1.19217e+06	875605	757869	915205	3.0434e+06	2.53809e+06	2.77333e+06	1.11302e+06	2.40807e+06	3.40213e+06	-	-
Zblp004317	C11H11NO3	(S)-3-(2-oxopropyl)-3-hydroxyindolin-2-one	Alkaloids	-	1.7842e+06	7.36467e+06	2.04436e+06	2.14836e+06	1.98836e+06	2.20293e+06	247442	296751	353730	335038	312319	284752	-	-
pmb3142	C13H16O8	Salicylic acid-2-O-glucoside	Phenolic acids	10366-91-3	506435	2.2439e+06	3.2575e+06	245012	242585	227590	2.2282e+06	2.47975e+06	3.39754e+06	4.45534e+06	8.32757e+06	8.5211e+06	-	-
Lmmn002260	C27H36O12	5'-Methoxyisolariciresinol-9'-O-glucoside	Lignans and Coumarins	-	658603	419737	378974	114429	104015	98701.5	1.20821e+07	1.40798e+07	9.96212e+06	1.07967e+07	1.07807e+07	1.1219e+07	-	-
MWS201421	C14H20N2O3S	Met-Phe	Amino acids and derivatives	14492-14-9	68971.9	32551.6	53859.5	65562.1	81355.9	58806.2	110214	87733	84938.2	18205.7	101660	243627	-	-
pmn001700	C30H48O3	24,30-Dihydroxy-12(13)-ene-lupeol	Terpenoids	-	10055.6	230377	82716.8	54047.1	56502.1	51980.4	8.67118e+06	9.35863e+06	9.86481e+06	8.73949e+06	1.2009e+07	1.14497e+07	-	-
mws0255	C4H5N3O	Cytosine	Nucleotides and derivatives	71-30-7	777800	749482	731593	742852	851354	787774	1.40269e+06	1.2161e+06	1.1314e+06	755688	1.00164e+06	1.02479e+06	C00380	ko00240,ko01100,ko01232
pme3388	C7H16N4O2	Homoarginine	Amino acids and derivatives	156-86-5	302964	265599	209628	597185	482079	595733	1.37796e+06	825979	1.24324e+06	198464	555368	491183	C01924	-
MWS04491	C5H7NO2	3,4-Dehydro-DL-proline	Amino acids and derivatives	3395-35-5	142918	121906	148717	206826	222113	258948	257429	242837	255670	89628.1	136492	205716	-	-
Lmsn004323	C23H24O13	1-O-Galloyl-2-O-Feruloyl-β-D-glucose	Phenolic acids	-	9	9	9	9	9	9	732133	670313	776568	711098	911117	976281	-	-
Zbbp009970	C15H18O3	Mansonone S	Others	-	181552	185379	124793	8655.39	8412.13	13011.3	52749.1	54105.1	59124.7	17852.6	38701.3	39204	-	-
Lmgp002593	C7H6O2	3-hydroxybenzaldehyde	Phenolic acids	100-83-4	3.43466e+06	665988	708465	4.64551e+06	4.80023e+06	4.49463e+06	1.32528e+07	1.24494e+07	1.23381e+07	2.19479e+07	2.15135e+07	1.98258e+07	C03067	-
Zmyn004449	C18H30O4	9-Hydroxy-12-oxo-10(E),15(Z)-octadecadienoic acid	Lipids	-	90826.6	76989	87311.1	88633.9	117511	99472.1	697606	849347	393340	166564	130436	129922	C21923	ko00592,ko01110
Lmbn001930	C7H6O2	2-Hydroxybenzaldehyde (Salicylaldehyde)	Phenolic acids	90-02-8	36927.1	33832.4	23902.3	30242.2	17367.3	22162.6	206328	165482	238217	106742	186371	198883	C06202	ko01100
Hmsn002948	C18H26O11	2-Hydroxyphenol-1-O-glucosyl(6→1)rhamnoside	Phenolic acids	-	16232.2	12029.8	7844.83	8124.89	11553.3	10249.9	162550	117723	177839	34786.1	175093	305260	-	-
MWS5235	C18H36O3	12-Hydroxyoctadecanoic acid	Lipids	106-14-9	44347.4	40058.4	32227.8	23494.9	34510	44368.4	73283.6	53745.5	50131.6	39380.1	84090.4	67520.1	-	-
MWS201477	C8H16N2O5	Thr-Thr	Amino acids and derivatives	-	106343	170171	163501	132846	134244	140253	76057.6	52595.2	62533.9	37090.7	37566.2	53528.1	-	-
pme0122	C8H16N2O3	N6-Acetyl-L-lysine	Amino acids and derivatives	692-04-6	53106	174644	135817	185101	61836.8	105318	3.54672e+06	1.26009e+06	2.88945e+06	157048	2.90998e+06	3.53855e+06	C02727	ko00310,ko01100
mws1094	C15H12O6	Aromadendrin (Dihydrokaempferol)	Flavonoids	480-20-6	2334.38	1489.54	1581.99	4031.16	6355.9	1767.44	112056	170661	118439	58267.7	62196.7	95323.4	C00974	ko00941,ko01100,ko01110
MWSmce689	C19H32O2	Methyl linolenate	Lipids	301-00-8	2.18548e+06	2.18703e+06	2.71469e+06	2.662e+06	2.58798e+06	1.98249e+06	39839.3	10911.9	18576.4	9324.58	20912.2	21667.4	-	-
Lmbn005369	C18H32O3	13(S)-HODE;13(S)-Hydroxyoctadeca-9Z,11E-dienoic acid	Lipids	10219-69-9	5.88104e+06	6.13491e+06	6.42962e+06	9.45853e+06	1.05258e+07	8.70186e+06	373979	395200	267652	127496	168421	158676	C14762	ko00591
pme0230	C10H13N5O4	Adenosine	Nucleotides and derivatives	58-61-7	9.7281e+06	3.83847e+06	6.46268e+06	3.36011e+06	5.05274e+06	4.54219e+06	6.2169e+06	5.70258e+06	5.06187e+06	3.0394e+06	4.12378e+06	6.55268e+06	C00212	ko00230,ko01100,ko01232,ko02010
MWS3046	C9H10O4	3-(3-Hydroxyphenyl)-3-hydroxypropanoic acid	Phenolic acids	3247-75-4	4435.34	17344.9	28796.9	7792.99	12419.3	12569.6	2.29872e+06	2.86622e+06	2.98703e+06	884636	1.92195e+06	1.45812e+06	-	-
pmp001251	C26H50NO7P	LysoPC 18:2(2n isomer)	Lipids	-	158972	492534	423028	263302	213074	270116	3.80113e+06	2.80924e+06	3.43742e+06	2.06927e+06	3.83518e+06	4.24554e+06	-	-
Lmtn005440	C20H24O6	Dihydrodehydrodiconiferyl alcohol	Lignans and Coumarins	126253-41-6	14496.5	3575.01	8724.41	9571.42	6467.85	3854.02	365715	345183	424353	512021	574753	153500	-	-
mws1333	C12H22O11	Melibiose	Others	585-99-9	1.10226e+06	228823	154308	124808	62450.1	143522	4.35294e+06	4.74487e+06	2.60966e+06	1.81363e+06	1.74325e+06	1.88111e+06	C05402	ko00052,ko01100,ko02010
Zmjn001030	C10H14N5O7P	Adenosine 2'-Phosphate	Nucleotides and derivatives	130-49-4	1.14634e+06	1.07589e+06	1.37094e+06	957340	1.56756e+06	1.4245e+06	469963	458590	457430	201640	307473	593039	C00946	-
Hmjn008136	C30H46O4	2,3-Dihydroxyoleana-11,13(18)-dien-28-oic acid (Camaldulenic acid)	Terpenoids	71850-15-2	47078.8	14699.7	210803	92611.6	159851	155579	4.57553e+06	5.07628e+06	4.21601e+06	4.43637e+06	5.36399e+06	5.7335e+06	-	-
MWS04412	C8H18N2O2	N(6),N(6)-Dimethyl-L-lysine	Amino acids and derivatives	2259-86-1	1.11048e+07	9.25466e+06	8.35124e+06	1.06731e+07	5.4802e+06	8.90108e+06	1.04477e+08	5.82199e+07	7.51793e+07	8.49077e+06	4.7328e+07	4.17869e+07	-	-
Lmhp012042	C21H38O4	2-Linoleoylglycerol	Lipids	3443-82-1	568490	682526	513456	532625	466791	402085	92345.6	50649.4	68997.8	23229.4	28805.4	18737.5	-	-
Lmhp011549	C28H56NO7P	LysoPC 20:1	Lipids	-	653342	1.48117e+06	974272	806771	708473	1.26109e+06	1.91915e+06	1.33324e+06	1.95908e+06	623834	2.86044e+06	4.39226e+06	-	-
pmb3079	C8H16NO9P	N-Acetyl-D-glucosamine-1-phosphate	Others	6866-69-9	643080	608966	454656	276816	342936	355166	208297	213458	128101	112678	106470	132237	C04256	-
pmd0130	C22H46NO7P	LysoPC 14:0	Lipids	20559-16-4	402955	724105	624104	492484	610712	676865	510942	491736	532893	331616	1.03962e+06	1.5299e+06	-	-
Zmyn000230	C5H8O5	2-Dehydro-3-deoxy-L-arabinonate	Others	-	1.24205e+06	1.4563e+06	1.03677e+06	2.10137e+06	1.69015e+06	1.73237e+06	1.08746e+06	613757	1.0376e+06	316725	941405	1.02553e+06	C00684	ko00053,ko01100
MWS201415	C9H14N2O5	Pro-Asp	Amino acids and derivatives	85227-98-1	787514	1.32899e+06	1.17407e+06	917926	844272	877093	636938	458004	535089	231796	487361	524527	-	-
mws1589	C18H32O16	D-Panose	Others	33401-87-5	11578.4	63717.1	83047.9	107806	96595.9	88330.3	5.38882e+06	6.05855e+06	4.72447e+06	3.17702e+06	2.54256e+06	5.82014e+06	C00713	-
Zmgn005057	C18H34O3	9,10-Epoxyoctadecanoic Acid	Lipids	2443-39-2	3.57601e+06	3.56105e+06	1.36392e+06	3.50364e+06	3.33173e+06	2.96729e+06	5.48452e+06	4.37006e+06	7.38572e+06	6.11393e+06	7.35008e+06	7.84155e+06	C19418	ko00073
Lmtp008061	C15H24O	Santalol	Terpenoids	-	101509	160568	123267	98938.2	108132	69743.5	219289	233466	250939	163005	221630	175626	-	-
Zaxn005958	C20H28O2	18-Oxoferruginol	Terpenoids	-	22011.8	5361.82	11938	11977.8	20197.8	17487.2	1.84958e+06	1.43097e+06	1.89081e+06	380684	301041	395308	-	-
mws0237	C9H16O4	Azelaic acid	Organic acids	123-99-9	1.29274e+07	1.18486e+07	1.09648e+07	1.77519e+07	1.88463e+07	1.91719e+07	1.52672e+06	1.50716e+06	1.68339e+06	997679	1.34035e+06	1.01238e+06	C08261	-
mws0675	C11H15N2O8P	β-Nicotinamide mononucleotide	Nucleotides and derivatives	1094-61-7	1.95135e+06	1.57979e+06	2.07728e+06	1.77932e+06	1.8664e+06	1.50996e+06	214978	166011	119713	83020.5	208587	250111	C00455	ko00760,ko01100
Hmln003529	C18H26O10	Benzyl β-primeveroside	Phenolic acids	130622-31-0	14340.5	50811	65825.8	31851.8	36756.7	31748.8	1.21782e+07	1.25085e+07	9.59479e+06	1.41304e+07	9.90884e+06	1.14327e+07	-	-
Lmbn004847	C10H12O3	4-Methoxyphenylpropionic acid	Phenolic acids	-	258112	174350	207629	145122	142918	165463	149185	155892	152534	455316	180859	145637	-	-
Zmgp004369	C20H22O5	7-(3,4-Dihydroxyphenyl)-1-(4-hydroxy-3-methoxyphenyl)-4-en-3-heptanone	Others	-	17179.5	21548.1	20643.8	35119.2	34698.7	23925.8	2.34854e+06	2.41713e+06	2.40513e+06	1.12214e+06	1.25929e+06	1.08113e+06	-	-
mws0014	C10H10O4	Ferulic acid	Phenolic acids	537-98-4	533151	476785	395430	450584	458255	420260	1.06407e+07	1.08771e+07	1.0743e+07	6.13641e+06	9.34612e+06	1.14174e+07	C01494	ko00940,ko01100,ko01110
pme0422	C10H10O4	Isoferulic Acid	Phenolic acids	25522-33-2	533151	476785	395430	450584	458255	420260	1.06407e+07	1.08771e+07	1.0743e+07	6.13641e+06	9.34612e+06	1.14174e+07	C10470	-
Hmqp005412	C20H30O3	12-Hydroxyabietic Acid	Terpenoids	3484-61-5	6.3052e+06	9.82776e+06	7.92818e+06	8.98242e+06	7.79896e+06	8.53208e+06	403088	1.21405e+06	1.38434e+06	113628	148270	178399	-	-
Li512114	C31H50O4	2,3-Dihydroxyurs-12-en-28-oic acid methyl ester (Corosolic acid methyl ester)	Terpenoids	4518-70-1	26032.9	45914.9	20385.7	60310.6	88639	75750.1	9	9	9	9	9	9	-	-
Lmbn001609	C6H10O4	2-Acetyl-2-Hydroxybutanoic Acid	Organic acids	-	43524.2	70696	55736.2	222385	196969	175583	35849	30473.9	62071.1	6151.51	34173.8	37376	C06006	ko00290,ko01100,ko01110,ko01210,ko01230
Zmhn001793	C15H18O9	6-O-Caffeoyl-D-glucose	Phenolic acids	-	740671	689142	229879	53459.3	76998.1	103730	1.27197e+07	1.23708e+07	1.4822e+07	1.48761e+07	1.5775e+07	1.69384e+07	-	-
MWSmce278	C21H26O3	Acitretin	Others	55079-83-9	9	9	9	9	9	9	154617	170934	146359	135787	235773	260937	-	-
pmb2799	C18H32O3	12,13-Epoxy-9-Octadecenoic Acid	Lipids	6799-85-5	137344	88977.6	137797	128631	149625	120175	90176	75339.6	65267.9	40000.7	21893.9	49905.9	C14826	ko00591,ko01100
Zajp007311	C20H20O7	3',4',5',5,7-Pentamethoxyflavone	Flavonoids	53350-26-8	46968.1	21107.8	50318	21582.7	20481.1	14947.5	25723.3	31072.7	44867	21640.2	48033.2	65289	-	-
MWSmce264	C8H10O3	Hydroxytyrosol	Phenolic acids	10597-60-1	1.15189e+06	3.39693e+06	7.11214e+06	2.83987e+06	2.96085e+06	2.70949e+06	396879	589400	640322	418662	483226	682309	-	-
pme0281	C8H6O4	Terephthalic acid	Phenolic acids	100-21-0	1.3723e+06	1.18909e+06	839247	599611	598162	567416	1.20684e+07	1.19998e+07	1.25394e+07	1.32022e+07	3.23583e+07	3.31224e+07	C06337	ko01100
mws1488	C16H32O2	Palmitic acid	Lipids	57-10-3	320250	352929	338280	351854	367888	366058	288725	254591	278956	183115	262024	282899	C00249	ko00061,ko00062,ko00071,ko00073,ko01040,ko01100,ko01212
Hmgp002327	C11H9O2N	3-amino-2-naphthoic acid	Alkaloids	-	3.06658e+06	2.31804e+06	1.41773e+06	853237	619720	715179	4.22021e+06	2.80001e+06	3.07359e+06	945800	1.73392e+06	1.45362e+06	-	-
Wafn011571	C18H32O3	alpha-Hydroxylinoleic acid	Lipids	57818-44-7	4.98813e+06	5.33612e+06	5.87496e+06	8.64713e+06	8.79301e+06	8.24069e+06	342210	380258	264695	115179	152272	160523	-	-
pmc0960	C28H50NO7P	LysoPC 20:4	Lipids	-	5358.77	52114.4	43256.9	51996	43536.8	62091.6	1.27674e+06	619563	834238	245732	1.14e+06	1.45171e+06	-	-
mws0216	C5H9NO3	Trans-4-Hydroxy-L-proline	Amino acids and derivatives	51-35-4	280742	174409	340446	269239	217144	189150	1.09893e+06	749083	690422	252762	526800	576057	C01157	ko00330,ko00470,ko01100,ko02010
mws2608	C8H15NO6	N-Acetyl-D-galactosamine	Others	1811-31-0	171260	175134	199859	169367	182750	172967	156002	127584	153706	113291	131658	130689	C01132	ko00052,ko00520,ko01100,ko01250
MWS201405	C15H18N4O4	His-Tyr	Amino acids and derivatives	35979-00-1	99065.7	73512.5	91343.2	122405	128492	131866	31788	30406	17747.5	11444.1	34038.1	18544.1	-	-
Zmzn000079	C4H9O7P	D-Erythrose-4-phosphate	Others	585-18-2	146545	299650	250057	506991	503147	444664	250928	213808	285301	119650	280729	235879	C00279	ko00030,ko00400,ko00710,ko00750,ko01100,ko01110,ko01200,ko01230,ko01240
NK10251888	C8H18N4O2	NG,NG-Dimethyl-L-arginine	Amino acids and derivatives	30315-93-6	1.32993e+06	1.02224e+06	1.14228e+06	4.76516e+06	4.52031e+06	5.51054e+06	1.73926e+06	934983	1.25382e+06	286493	480665	587813	C03626	-
Lmsn004322	C24H24O12	1,6-Di-O-caffeoyl-β-D-glucose	Phenolic acids	-	104181	189444	62477.4	55686	75238.9	66729.1	1.18147e+06	1.27071e+06	1.05065e+06	506900	730660	906688	-	-
pme2122	C5H9N3	Histamine	Alkaloids	51-45-6	765175	747801	725764	653208	904445	914493	1.54747e+06	1.2913e+06	1.24033e+06	721389	1.05968e+06	1.21209e+06	C00388	ko00340,ko01100,ko01110
mws0367	C18H30O2	α-Linolenic Acid	Lipids	463-40-1	822718	753545	737849	794972	815485	863640	234902	229551	247454	65330.1	176317	189321	C06427	ko00592,ko01040,ko01100,ko01110
mws1417	C9H7NO2	Indole-3-carboxylic acid	Alkaloids	771-50-6	43586.9	26169.2	56069.5	42829	24860.6	22416.2	66031.2	50341.1	46960.9	40911.9	31955.4	41520.9	C19837	-
MWSslk257	C9H14N3O8P	Cytidine 5'-monophosphate(Cytidylic acid)	Nucleotides and derivatives	63-37-6	277861	319298	255803	209530	319310	324151	114614	87929.9	114132	45378.2	42380.1	66864.3	C00055	ko00240,ko01100,ko01232
Zmdp000446	C9H16N2O5S	γ-L-Glutamyl-S-methyl-L-cysteine	Amino acids and derivatives	-	334552	139683	91421.9	135726	184278	119068	69109.2	28136.7	70246.2	22977.4	42414.9	46351.6	-	-
mws1433	C18H19NO4	N-Feruloyltyramine	Alkaloids	66648-43-9	26749.8	39412.5	22302.8	13413.5	20732.2	7849.77	3.33602e+06	4.6936e+06	4.54076e+06	6.25253e+06	4.55297e+06	4.31561e+06	C02717	-
mws0913	C21H20O11	Kaempferol-3-O-galactoside (Trifolin)	Flavonoids	23627-87-4	1.21462e+06	1.34804e+06	1.8579e+06	1.70562e+06	1.61672e+06	1.7361e+06	340351	304108	428226	339916	652370	511211	C12626	ko00944,ko01110
pmb0069	C7H7NO	Benzamide	Phenolic acids	55-21-0	507687	344743	387335	327309	280504	298448	314394	186592	281133	60956.5	281715	339244	C09815	-
Lmqn000351	C12H22O10	Rutinose	Others	90-74-4	558282	671721	796024	581208	554330	144637	75041.5	57467.6	42473.8	29662.9	30758.2	30569.4	C08247	-
mws4019	C20H28O2	Sugiol	Terpenoids	511-05-7	3721.6	10599.1	23160	14061.5	21764.6	9850.54	2.27004e+06	1.72976e+06	1.8303e+06	421108	323734	410854	C21822	ko00904,ko01110
mws1610	C30H48O4	2,3-Dihydroxyurs-12-en-29-oic acid (Maslinic acid)	Terpenoids	4373-41-5	4373.43	898.043	85135.6	37792.3	47040.2	42711.2	1.38002e+06	1.36223e+06	1.29387e+06	1.25809e+06	1.55057e+06	1.5202e+06	C16939	-
Lmhp008273	C20H40NO7P	LysoPE 15:1(2n isomer)	Lipids	-	18996.1	59157.3	60120.5	43043	46715.6	82265.3	896157	561739	698829	162946	374983	343389	-	-
MWSmce367	C30H46O3	3-Oxours-12-en-28-oic acid (Ursonic acid)	Terpenoids	6246-46-4	9	9	9	9	9	9	25361.4	26673	24322.6	21313	12358.7	33512.9	-	-
Rfmb087	C18H32O4	9-Hydroxy-13-oxo-10-octadecenoic Acid	Lipids	-	2.30126e+06	3.19371e+06	2.89006e+06	5.18546e+06	5.11934e+06	5.45705e+06	1.9887e+06	2.99398e+06	1.32876e+06	527287	513315	447822	-	-
Lhhp102901	C20H24O6	3-(α,4-Dihydroxy-3-methoxybenzyl)-4-(hydroxy-3-methoxybenzyl)	Others	-	45701	68525.4	11356.9	25258.9	18665.7	38962.6	142492	125054	96072.4	186550	189603	210901	-	-
Zmyn004732	C18H30O3	2R-hydroxy-9Z,12Z,15Z-octadecatrienoic acid	Lipids	-	211143	267565	256960	201110	280033	403214	865844	1.22481e+06	723428	279312	252805	245154	C16342	ko00592
pme3337	C14H17N5O8	Succinyladenosine	Nucleotides and derivatives	4542-23-8	1.51284e+07	1.99487e+07	2.0038e+07	1.85012e+07	1.88018e+07	1.69424e+07	3.18604e+07	2.90975e+07	3.47933e+07	1.93249e+07	3.00965e+07	3.01475e+07	-	-
MWSmce084	C14H16O3	Fraxinellone	Others	28808-62-0	34372.8	30600.1	12440	19282.1	16817.5	18642.3	306581	291432	344124	106459	236423	281457	-	-
MWSmce165	C6H14O5	L-Fucitol	Others	13074-06-1	428049	586801	327966	403405	356096	355426	431064	276475	285556	97114.9	194387	184362	-	-
pme0057	C4H9NO2S	L-Homocysteine	Amino acids and derivatives	6027-13-0	1.0604e+06	274600	203835	155700	88873.9	189414	230784	162863	232259	77549.4	277633	282890	C00155	ko00270,ko00920,ko01100,ko01110,ko01230
Lmbn006152	C18H32O2	(9Z,11E)-Octadecadienoic acid	Lipids	2540-56-9	1.71155e+06	2.14843e+06	1.75594e+06	1.90442e+06	1.97449e+06	1.76339e+06	524578	472241	499839	298527	376575	401817	C04056	ko00591
mws0906	C16H22O8	Coniferin	Phenolic acids	531-29-3	610666	406776	397856	247242	196890	317491	1.29423e+07	1.21275e+07	1.37615e+07	4.6505e+06	1.05117e+07	8.17371e+06	C00761	ko00940,ko01110
Lmhp008337	C19H40NO7P	LysoPE 14:0(2n isomer)	Lipids	-	31170.8	367371	124290	116952	270318	201077	1.56749e+06	788177	1.86381e+06	260417	888516	557753	-	-
MWSmce370	C8H8O3	4-Hydroxyphenylacetic acid	Phenolic acids	156-38-7	13908.8	17530.1	15364.5	3678.16	3524.69	6741.02	334094	280403	337903	300391	209218	269685	C00642	ko00350,ko00360,ko01100
MWS201397	C10H18N2O4	Hyp-Val	Amino acids and derivatives	-	57971.6	81418.8	60733.3	52134.8	50535.1	53462.8	110101	54933	121900	45370.6	70597.3	75701.6	-	-
Lmgn001670	C7H6O3	Salicylic acid	Phenolic acids	69-72-7	160903	114413	144841	119054	115404	134959	2.23717e+07	1.89619e+07	1.73145e+07	1.18982e+07	1.8288e+07	2.35402e+07	C00805	ko01100,ko01110,ko04075
MWS4471	C6H10N2O4	N-Alpha-Acetyl-L-Asparagine	Amino acids and derivatives	4033-40-3	41203.2	51070.8	27986.7	17759.1	24439.3	20543.5	43233.6	42456.5	22373	17903.6	19577.3	17018.4	-	-
pme0519	C12H22O11	D-Sucrose	Others	57-50-1	1.56442e+06	4.2236e+06	4.8816e+06	1.29546e+06	1.83677e+06	1.94188e+06	5.75067e+06	3.82665e+06	4.51627e+06	4.52704e+06	3.14829e+06	4.08556e+06	C00089	ko00052,ko00500,ko01100,ko01110,ko02010
MWSHY0202	C16H12O2	6-Methylflavone	Flavonoids	29976-75-8	24922.4	76545.2	58139.4	41903.1	22385	40814.3	237004	176035	94354.4	9160.73	95691.7	54880.8	-	-
pmb2507	C5H11O7P	2-Deoxyribose-1-phosphate	Nucleotides and derivatives	17210-42-3	155079	266123	263181	562044	617236	382296	479169	652277	463193	78184	262239	208913	C00672	ko00030,ko00240,ko01100
MWSmce134	C30H46O3	3-Oxolup-20(29)-en-28-oic acid (Betulonic acid)	Terpenoids	4481-62-3	55031	47342.8	32832.6	40145.5	59290.4	37970.5	7.5408e+06	9.82309e+06	4.94976e+06	5.48157e+06	7.42517e+06	7.98885e+06	-	-
Lmsn002548	C15H18O9	1-O-Caffeoyl-β-D-glucose	Phenolic acids	14364-08-0	84219	48693.3	59444.3	30750.8	35676.9	41092	3.60988e+07	3.93976e+07	3.89662e+07	1.57358e+07	3.16457e+07	2.86853e+07	C10433	-
Lmcn009122	C16H30O2	(7Z)-Hexadecenoic acid	Lipids	2416-19-5	19515.9	78379.8	75311.3	119646	92218.7	103906	35041.6	25583.4	42658.8	15966.8	35538.7	44987.4	-	-
mws0361	C16H30O2	Palmitoleic Acid	Lipids	373-49-9	19515.9	78379.8	75311.3	119646	92218.7	103906	35041.6	25583.4	42658.8	15966.8	35538.7	44987.4	C08362	ko00061,ko01100
pmd0132	C24H50NO7P	LysoPC 16:0(2n isomer)	Lipids	-	736500	1.05276e+06	994902	607476	585325	714361	1.26084e+06	1.29052e+06	1.22348e+06	471933	856312	1.04905e+06	-	-
MWS1882	C4H7NO4	Iminodiacetic acid	Organic acids	142-73-4	549036	429247	384154	362697	370353	372425	423880	276182	262452	122887	200284	221826	C19911	-
pmb0323	C13H18N2O3	N-Caffeoylputrescine	Alkaloids	29554-26-5	246124	150975	122460	4.92375e+06	125215	277774	393119	519837	358404	273731	325882	1.00026e+07	C03002	-
pme3732	C9H13N3O5	Cytidine	Nucleotides and derivatives	65-46-3	795503	727754	855983	614422	1.12969e+06	849662	1.16888e+06	1.1562e+06	894978	656568	1.07265e+06	1.12645e+06	C00475	ko00240,ko01100,ko01232,ko02010
Hmbn002692	C22H30O14	6'-O-Feruloyl-D-sucrose	Phenolic acids	118230-77-6	207862	423062	814955	787100	1.05869e+06	1.3005e+06	1.66677e+06	1.11333e+06	903852	534912	584532	428855	-	-
pmb0197	C11H15N5O5	N7-Methylguanosine	Nucleotides and derivatives	20244-86-4	451225	453621	481216	404451	439346	403144	429488	266007	372626	245245	396477	417188	C20674	-
Lmhp002001	C14H20N2O3	L-Valyl-L-Phenylalanine	Amino acids and derivatives	3918-92-1	358592	301539	442719	619920	695027	589641	272941	251407	155694	89463.2	176631	201928	-	-
MWSmce116	C10H13N5O3	5'-Deoxyadenosine	Nucleotides and derivatives	4754-39-6	550281	899248	968896	2.22386e+06	2.91871e+06	2.27167e+06	5.26709e+06	4.05584e+06	3.60629e+06	4.40183e+06	4.67056e+06	4.71586e+06	C05198	-
Lmlp003161	C14H20N2O3	N-Feruloylputrescine	Alkaloids	501-13-3	9.63967e+06	3.72524e+06	5.17285e+06	4.30929e+06	3.9107e+06	4.25334e+06	5.19188e+06	4.55701e+06	8.26322e+06	2.9097e+06	5.15034e+06	1.41275e+07	C10497	ko00330,ko01100
pme1654	C12H18O3	Jasmonic acid	Organic acids	77026-92-7	29033	25337.1	17922.4	92142.8	201598	226925	326643	990230	481245	303691	297473	175259	C08491	ko00592,ko01100,ko01110,ko04075
MWSmce501	C8H8O4	Protocatechuic Acid Methyl Ester	Phenolic acids	2150-43-8	31317.4	22160.7	5076.4	9455.69	4137.78	17358.4	882057	779455	696514	1.06339e+06	1.34466e+06	1.66074e+06	-	-
Ymjm000152	C12H16O7	p-Hydroxypheny-β-D-allopyranoside	Phenolic acids	-	11653.8	34673.5	49837.9	1856.85	8751.76	2477.31	120145	149570	238090	406683	561130	563998	-	-
pmb0492	C34H37N3O6	N',N'',N'''-p-Coumaroyl-cinnamoyl-caffeoyl spermidine	Alkaloids	-	269792	392713	375810	245572	302983	219476	160511	152494	149862	66229	118032	131805	-	-
Lmsn012627	C30H46O4	2,3-Dihydroxyurs-12,18-dien-28-oic acid	Terpenoids	-	9	9	9	9	9	9	268297	214510	235085	190601	207032	184585	-	-
pmb2826	C5H8O5	L-Citramalic acid	Organic acids	6236-09-5	867324	1.21683e+06	1.23106e+06	1.86882e+06	1.70262e+06	1.38058e+06	1.14962e+06	890980	1.3285e+06	501121	1.13905e+06	1.14492e+06	C02614	ko00660,ko01100
pma3101	C11H14NO6+	Nicotinate D-ribonucleoside	Others	17720-18-2	7.31631e+06	8.09266e+06	7.04752e+06	7.77475e+06	7.42521e+06	6.94442e+06	4.82366e+06	3.45661e+06	4.30209e+06	1.93136e+06	3.1907e+06	3.83032e+06	C05841	ko00760,ko01100
pmb2787	C18H30O3	9-Oxo-10E,12Z-octadecadienoic acid	Lipids	54232-59-6	209410	130324	464333	208462	276565	219099	19631.9	20172.7	13641.1	14027.9	15587.3	8412.73	C14766	ko00591
MWSmce040	C8H8O3	Isovanillin	Phenolic acids	621-59-0	2.73081e+06	1.24807e+06	2.01574e+06	4.8452e+06	3.92164e+06	3.98353e+06	4.70445e+06	5.74038e+06	3.66531e+06	6.53954e+06	4.81699e+06	3.36912e+06	-	-
mws0262	C4H6O6	L-Tartaric acid	Organic acids	87-69-4	1.75415e+06	125108	211116	1.33902e+06	1.94747e+06	1.87481e+06	1.20311e+06	1.09693e+06	1.26752e+06	2.37421e+06	3.00729e+06	4.24916e+06	C00898	ko00630,ko01100
pme1383	C8H11NO3	Pyridoxine	Others	65-23-6	1.05314e+06	1.16912e+06	1.00175e+06	592538	741598	610905	617257	584663	365444	365854	561492	640157	C00314	ko00750,ko01100,ko01240
Lmhp008718	C25H48NO7P	LysoPC 17:2	Lipids	-	104111	286735	210995	127628	103022	142840	5.0551e+06	3.36561e+06	4.54773e+06	1.71431e+06	4.91127e+06	5.00034e+06	-	-
Zmhn000892	C13H18O8	4-O-Glucosyl-3,4-dihydroxybenzyl alcohol	Phenolic acids	-	89365	193552	213011	148900	33123.2	30877.7	139977	145290	306430	301991	409516	378723	-	-
pmf0395	C18H34O2	Oleic acid	Lipids	112-80-1	37484.8	36628.3	151571	20562.3	16554	34674.3	2.62564e+06	2.59481e+06	2.62416e+06	9.58449e+06	8.16736e+06	8.62313e+06	C00712	ko00061,ko00073,ko01040
Lmln010063	C14H22O	2,6-Di-tert-butylphenol	Phenolic acids	128-39-2	23818.5	23259.1	25285.3	16081	16287.8	18375.9	246432	249421	150075	150947	182668	189429	-	-
MWSmce690	C6H8O6	Erythorbic Acid; Isoascorbic Acid	Others	89-65-6	88714.5	33677	64338.4	147811	105923	99083.2	87743.5	70965.3	204403	79859.9	40678.3	331351	-	-
mws0458	C8H8O3	Vanillin; 4-Hydroxy-3-Methoxybenzaldehyde	Phenolic acids	121-33-5	5.39503e+06	3.34227e+06	4.59149e+06	1.03429e+07	9.22808e+06	8.92078e+06	8.16357e+06	9.18629e+06	6.68708e+06	1.13537e+07	8.52867e+06	6.40658e+06	C00755	ko01100,ko01110
pmb3107	C15H20O10	Glucosyringic Acid	Phenolic acids	-	245158	1.58415e+06	234090	17135.4	31834.7	17144	2.28457e+06	4.2253e+06	4.35378e+06	3.6551e+06	5.94672e+06	6.45493e+06	-	-
MWSslk102	C5H3ClN4	6-Chloropurine	Nucleotides and derivatives	87-42-3	6.6037e+06	6.61144e+06	6.20091e+06	6.53696e+06	6.26967e+06	6.5681e+06	6.11371e+06	6.14131e+06	5.74813e+06	4.58746e+06	4.8747e+06	3.44988e+06	-	-
mws2368	C8H10O2	Tyrosol; 4-Hydroxyphenylethanol	Phenolic acids	501-94-0	26892.2	34422.9	34081.9	23362.8	20508.9	26765.3	3.47334e+06	3.26223e+06	2.92672e+06	2.01432e+06	2.84291e+06	3.47375e+06	C06044	ko00350,ko01100
Lmhp001670	C11H22N2O3	L-Valyl-L-Leucine	Amino acids and derivatives	3989-97-7	661769	467777	791869	1.32068e+06	1.50456e+06	1.23489e+06	595686	617055	394945	288884	447434	386008	-	-
MWS20145	C21H22O11	Eriodictyol-7-O-glucoside	Flavonoids	38965-51-4	9	9	9	13908.6	38042.7	36282.7	3.58738e+06	4.22155e+06	3.74668e+06	4.55161e+06	4.86172e+06	4.66887e+06	-	-
Lmyp011718	C15H14O2	Deoxylapachol	Quinones	3568-90-9	216873	173060	206937	172622	205297	215247	3.9434e+06	4.07995e+06	3.23158e+06	6.24948e+06	5.65437e+06	5.54021e+06	C10325	-
pme3311	C6H14O12P2	D-Fructose-1,6-biphosphate	Others	488-69-7	244908	504931	393387	445688	897818	537271	295959	306682	209418	121541	100998	124677	C00354	ko00400,ko00710,ko01100,ko01110,ko01200
pmb2928	C13H16O10	Gallic acid-4-O-glucoside	Phenolic acids	84274-52-2	34176.9	135254	71806.2	53358	57757.2	58294.5	4.848e+06	6.2463e+06	4.61629e+06	5.62195e+06	7.41324e+06	5.13363e+06	-	-
Zayp004030	C28H24O17	Myricetin-3-O-(2''-galloyl)glucoside	Flavonoids	-	263710	262880	239804	9	9	9	5.4063e+06	4.383e+06	4.30431e+06	3.04685e+06	4.45151e+06	5.04016e+06	-	-
mws0567	C5H11N3O2	4-Guanidinobutyric acid	Organic acids	463-00-3	1.27933e+07	2.31646e+07	1.38719e+07	6.85974e+06	7.91461e+06	1.15269e+07	8.36307e+06	5.04954e+06	7.57907e+06	3.14679e+06	4.3218e+06	6.19688e+06	C01035	ko00330,ko01100
MWSmce460	C5H9NO	2-Piperidone	Alkaloids	675-20-7	217515	171592	244051	239525	186766	151015	1.07291e+06	471089	660003	599065	2.72213e+06	3.65801e+06	-	-
Lajp010867	C30H48O4	13-Hydroxy oleanolic acid-3-oxo-28-acid	Terpenoids	-	7896.45	6526.62	13748.8	3076.4	5291.15	5362.28	48873.1	62008.1	49509.8	18180.4	87514.7	101152	-	-
Lhnp110101	C30H48O4	3,20-Dihydroxyurs-21-en-28-oic acid (Oleanderic acid)	Terpenoids	-	7896.45	6526.62	13748.8	3076.4	5291.15	5362.28	48873.1	62008.1	49509.8	18180.4	87514.7	101152	-	-
pmb0819	C10H8N2	3-Indoleacetonitrile	Alkaloids	771-51-7	1.54101e+06	1.48351e+06	1.05692e+06	780813	494593	693704	2.63562e+06	1.91947e+06	1.67038e+06	618827	731889	637165	C02938	ko00380,ko01100
Lmqn001795	C16H12O4	5-Hydroxy-7-methoxyflavone	Flavonoids	-	7653.21	8911.3	27552.7	21180.2	23283.7	17608.2	258487	269142	264204	209885	359911	495218	-	-
pmb1096	C8H7N	Indole	Alkaloids	120-72-9	1.71929e+07	1.39691e+07	1.17107e+07	9.67975e+06	1.46697e+06	2.8419e+06	2.19872e+07	1.72673e+07	1.79627e+07	6.83907e+06	1.05976e+07	9.62165e+06	C00463	ko00380,ko00400,ko01100,ko01110
mws0341	C6H12O3	2-Hydroxyisocaproic acid	Organic acids	20312-37-2	191510	225570	292658	74069.3	75023.1	81784.9	396760	308325	271928	175568	239455	339338	C03264	-
mws0120	C8H20NO6P	Choline Alfoscerate	Lipids	28319-77-9	1.44915e+07	2.55712e+07	2.46444e+07	7.97805e+06	5.18478e+06	5.22369e+06	5.60663e+06	4.46512e+06	3.12914e+06	1.01914e+06	3.60966e+06	5.11668e+06	C00670	ko00564,ko00565
Lmrj001341	C8H12N2O3	Cyclo(Ser-Pro)	Amino acids and derivatives	-	166936	215699	216064	212848	182669	190640	153703	155424	211612	123009	169459	172819	-	-
MWSmce675	C12H16O7	Arbutin	Phenolic acids	497-76-7	12771.4	35004.9	43467	2716.38	4223.84	3143.99	158165	152424	236597	437757	557337	570013	C06186	ko00010
MWS201476	C9H14N4O3	Ala-His	Amino acids and derivatives	3253-17-6	49197.9	71315.3	67539.9	92662.7	107716	77197.6	247571	199390	248165	295972	302346	273015	-	-
Zmyn005252	C17H34O3	3-Hydroxy-palmitic acid methyl ester	Lipids	51883-36-4	125257	303400	119589	155574	167199	167886	105074	115916	95678.3	56465.1	123062	77085.3	C11849	-
Hmhn003518	C16H20O9	4-O-β-D-glucopyranosylferulic acid	Phenolic acids	-	20205.3	103088	242780	46581.7	50078.2	69077	1.90526e+07	1.59416e+07	2.32111e+07	4.36708e+06	1.45572e+07	1.08858e+07	-	-
MWSmce177	C12H14O4	Ethyl ferulate	Phenolic acids	4046-02-0	17877.8	35418.1	24029	253268	315983	169996	69027.7	55716.4	62203.5	45284.5	39854.9	55456.6	-	-
Zbdp001892	C16H13NO3	7-Methoxy-3-[1-(3-pyridyl)methylidene]-4-chromanone	Flavonoids	-	1.06819e+07	4.53777e+06	7.37948e+06	3.82834e+06	5.35692e+06	5.35778e+06	7.24194e+06	6.63487e+06	5.64901e+06	3.25381e+06	4.95486e+06	7.14653e+06	-	-
Zmgn001039	C9H17NO6S	S-Ribosyl-L-homocysteine	Amino acids and derivatives	-	1.11276e+06	942680	1.32317e+06	580833	674189	685368	861907	856921	613741	469533	691863	1.02704e+06	C03539	ko00270,ko01100,ko01230
MWS3020	C7H16N2O	N-Acetylcadaverine	Alkaloids	32343-73-0	233578	332194	272245	275144	268306	240328	316311	268419	264305	278407	271542	251265	-	-
pmb0374	C5H5N5	2-Aminopurine	Nucleotides and derivatives	452-06-2	2.14327e+07	9.30556e+06	1.4344e+07	8.86424e+06	1.14788e+07	1.031e+07	1.52253e+07	1.44572e+07	1.24299e+07	7.86018e+06	1.0135e+07	1.61441e+07	-	-
Lmdp002969	C21H20O13	Myricetin-3-O-galactoside	Flavonoids	15648-86-9	65666.4	198601	46096.3	79193.1	85840.4	92990.8	2.5495e+06	2.37695e+06	4.11713e+06	1.25095e+06	6.05079e+06	1.09661e+07	-	-
mws1593	C24H42O21	D-Maltotetraose	Others	34612-38-9	4473.34	11638.9	9061.56	11530.9	4920.11	5837.29	732607	931103	502867	311747	369408	291740	C02052	-
Lmhp009890	C28H52NO7P	LysoPC 20:3	Lipids	1199257-41-4	3738.83	41974.8	33930.7	37920.3	18738.1	40694.4	873318	456846	805084	137177	1.36421e+06	1.8552e+06	-	-
MWS04581g	C13H17NO4	Ethyl N-acetyl-L-tyrosinate	Amino acids and derivatives	840-97-1	15748.2	10233.7	12584.4	10574.4	7253.73	18679.1	404351	273946	427988	609871	1.09526e+06	1.16318e+06	-	-
pmb0034	C10H16N2O7	L-α-Glutamyl-L-Glutamic Acid	Amino acids and derivatives	3929-61-1	293571	253209	394692	178258	160190	151851	580467	276637	325704	82240	147415	189264	C01425	-
mws1375	C12H21N3O6	Nicotianamine	Alkaloids	34441-14-0	1.96934e+06	1.88786e+06	2.14566e+06	2.48521e+06	2.40033e+06	2.22951e+06	2.05199e+06	1.54478e+06	1.95626e+06	425002	2.23388e+06	3.02397e+06	C05324	ko00270,ko00999,ko01100,ko01110
mws0572	C5H7N3O	5-Methylcytosine	Nucleotides and derivatives	554-01-8	156588	147505	146912	163938	135438	142610	196457	143295	190985	157512	308394	293838	C02376	ko00240,ko01100
Zmpn000638	C4H9N3O2	3-Guanidinopropionic acid	Organic acids	353-09-3	3.25885e+06	5.9072e+06	3.60592e+06	1.2519e+06	1.4563e+06	1.39238e+06	156069	201862	151677	161942	94687.2	131374	C03065	-
Lmbn000198	C4H6O5	3-Dehydro-L-Threonic Acid	Others	-	1.33744e+07	1.4605e+07	1.42639e+07	2.79719e+07	2.86879e+07	2.50387e+07	9.70116e+06	8.43855e+06	1.37286e+07	2.08331e+07	1.66418e+07	1.37342e+07	C03064	ko00053,ko01100
Lmmn003323	C16H32O3	2-Hydroxyhexadecanoic acid	Organic acids	764-67-0	3.656e+06	7.61048e+06	4.07674e+06	7.31891e+06	6.50827e+06	6.5914e+06	3.69035e+06	3.88163e+06	2.73684e+06	1.9799e+06	3.1282e+06	2.72717e+06	-	-
mws1409	C15H22N2O18P2	Uridine-5'-diphosphoglucuronic acid	Nucleotides and derivatives	-	113925	223077	313714	276022	279494	258543	230715	219342	179023	66758.3	172953	155983	-	-
mws4516	C5H7NO3	Pyroglutamic acid	Amino acids and derivatives	4042-36-8	568138	238286	265868	227256	246426	219099	1.86832e+06	1.57651e+06	1.27606e+06	346030	944622	1.26851e+06	-	-
NK10264324	C6H6O3	Phloroglucinol; 1,3,5-Benzenetriol	Phenolic acids	108-73-6	1.08076e+06	1.09633e+06	1.01913e+06	952562	920010	1.13588e+06	263399	561320	416295	607530	317070	333690	C02183	-
pmb2406	C25H52NO7P	LysoPC 17:0	Lipids	50930-23-9	483306	970615	669153	323827	410066	463123	6.46211e+06	7.89601e+06	6.51114e+06	3.05179e+06	3.45988e+06	3.3744e+06	-	-
mws0258	C6H13NO2	L-Isoleucine	Amino acids and derivatives	73-32-5	2.48868e+06	2.07017e+06	1.87937e+06	1.43443e+06	731465	783516	1.9004e+06	1.01481e+06	1.8862e+06	724298	1.96454e+06	2.39591e+06	C00407	ko00280,ko00290,ko00460,ko00960,ko00966,ko00970,ko01100,ko01110,ko01210,ko01230,ko02010
Cmmn012997	C20H30O2	Abietic acid	Terpenoids	514-10-3	213033	363256	454017	500441	169241	255576	160564	231672	110458	227669	116497	194473	C06087	ko00904,ko01100,ko01110
mws1659	C15H10O5	Emodin	Quinones	518-82-1	5622.93	7003.32	6038.01	6014.09	12535.5	6181.24	13995	15969.8	29444.8	59553.9	14392.9	9484.54	C10343	-
Hmtn001288	C9H10O4	Methyl 2,4-dihydroxyphenylacetate	Phenolic acids	67828-42-6	10737.4	10249.2	15461.2	8889.14	6345.92	13644.4	7.00913e+06	6.50138e+06	5.45754e+06	1.11711e+07	1.29356e+07	1.89657e+07	-	-
Zmdp001647	C10H18N2O5	γ-Glutamyl-L-valine	Amino acids and derivatives	-	901485	1.84516e+06	1.11098e+06	636663	597946	940630	4.43606e+06	3.19196e+06	3.81351e+06	1.01214e+06	1.65746e+06	1.616e+06	-	-
pma6455	C5H11O8P	Ribulose-5-phosphate	Others	4300-28-1	661175	512442	487257	316841	441692	688248	233927	260335	286553	241880	371045	168369	C00117	ko00030,ko00230,ko00440,ko00710,ko00750,ko01100,ko01110,ko01200,ko01230,ko01240
mws0473	C5H8O4	2-Methylsuccinic acid	Organic acids	498-21-5	41270.6	39783.5	34558.7	57681.2	55204.6	45213.7	88361.6	48261.3	82469.2	52450	178376	252517	-	-
Lmmn002164	C5H8O4	Monomethyl succinate	Organic acids	3878-55-5	41270.6	39783.5	34558.7	57681.2	55204.6	45213.7	88361.6	48261.3	82469.2	52450	178376	252517	-	-
Lmmn000806	C5H8O4	Dimethylmalonic acid	Organic acids	595-46-0	41270.6	39783.5	34558.7	57681.2	55204.6	45213.7	88361.6	48261.3	82469.2	52450	178376	252517	-	-
pmp001285	C8H4O3	Phthalic anhydride	Phenolic acids	85-44-9	5.97241e+06	3.05184e+06	2.44173e+06	4.23042e+06	3.19776e+06	3.07695e+06	3.21333e+06	4.4749e+06	5.73274e+06	3.72329e+06	2.87132e+06	3.28957e+06	-	-
pme1651	C10H9NO2	Indole-3-acetic acid (IAA)	Alkaloids	87-51-4	207122	122448	146883	107599	101330	118033	436344	338776	410896	255375	261546	211815	C00954	ko00380,ko01100,ko04075
Zmzp005934	C18H37NO	Stearamide	Alkaloids	124-26-5	60280.2	92252.8	56558.5	105462	85212.7	98358.6	54688.2	53474.6	54270.1	69513.7	54137.6	53038.9	C13846	-
Lmhp010040	C25H46NO7P	LysoPE 20:3	Lipids	-	4429.93	163695	83614.7	91913.1	74198.5	84493.7	1.12921e+06	836540	758038	227047	1.34853e+06	1.66074e+06	-	-
pmb0782	C5H11N	Piperidine	Alkaloids	110-89-4	1.02076e+07	7.44053e+06	6.89093e+06	3.7439e+06	2.70812e+06	2.96555e+06	6.96412e+06	4.20559e+06	5.89912e+06	1.62346e+06	6.8115e+06	8.59925e+06	C01746	ko00960
Sakn002857	C19H28O12	3,4-Dihydroxyphenethyl alcohol-8-O-[β-D-apinosyl(1→3)]-β-D-glucoside	Phenolic acids	-	10672	34109.6	16257.5	15185	12896.3	8781.96	1.92544e+06	1.5974e+06	2.43934e+06	2.66658e+06	1.60872e+06	1.59381e+06	-	-
Hmqn003054	C18H34O5	9,10,11-Trihydroxy-12-octadecenoic acid	Lipids	61911-67-9	18463.9	25018.6	30900.1	22148.1	25474.4	28450.1	244745	254560	253138	195667	208074	138162	-	-
pme1598	C22H24O11	Hesperetin-5-O-glucoside	Flavonoids	69651-80-5	24648.7	5.04201e+06	171284	31938.7	27078.2	23188.2	83237.5	130310	183908	207892	217146	146927	-	-
pmn001382	C25H24O12	Isochlorogenic acid A	Phenolic acids	2450-53-5	102837	146022	240665	96774.7	94060.1	62174.4	292004	403099	322136	259495	245168	303331	-	-
mws0366	C18H30O2	γ-Linolenic Acid	Lipids	506-26-3	1.18114e+08	1.13329e+08	1.06221e+08	1.07891e+08	1.18722e+08	1.21008e+08	2.94908e+07	3.15472e+07	2.62389e+07	8.2076e+06	2.04433e+07	2.20626e+07	C06426	ko00591,ko01040,ko01100
Zmyn000155	C7H14N2O3	N-α-Acetyl-L-ornithine	Amino acids and derivatives	6205-08-9	328320	386584	339707	295750	182471	293932	2.00828e+06	1.28396e+06	905901	87544.2	171803	191570	C00437	ko00220,ko01100,ko01110,ko01210,ko01230
Wafp003158	C16H24N4O3	N-Feruloylhomoagmatine	Alkaloids	-	46985.6	171042	85742.5	62399.6	36418.4	58888.5	1.06502e+07	9.68976e+06	1.78447e+07	2.76022e+06	1.08016e+07	1.39901e+07	-	-
Lmrn003000	C9H10O3	2-Hydroxy-3-phenylpropanoic acid	Phenolic acids	7326-19-4	15784.4	22280.3	19550.6	6863.59	16725.8	4971.61	28022.7	23908.8	22439	18939.6	26470.7	19164.6	C05607	ko00360,ko00960,ko01100,ko01110
Lmhp007598	C27H52NO7P	LysoPC 19:2(2n isomer)	Lipids	-	98744.1	50557.7	56255.7	193521	148277	239743	1.90957e+06	1.3995e+06	1.25526e+06	620918	1.43891e+06	1.28779e+06	-	-
mws0146	C7H7NO2	Nicotinic Acid Methyl Ester(Methyl Nicotinate)	Alkaloids	93-60-7	40396.5	130318	32726.6	77783.2	46893.5	51879.2	2.67143e+06	1.50593e+06	2.52231e+06	453469	1.06283e+06	2.66838e+06	-	-
pmb0962	C10H22N2O4	L-Lysine-Butanoic Acid	Amino acids and derivatives	80407-71-2	430248	2.45802e+06	50809.2	56229.1	15064.8	7208.18	1.93046e+06	776427	1.25334e+06	28176.7	299279	616712	-	-
pmn001695	C16H20O10	Trihydroxycinnamoylquinic acid	Phenolic acids	-	6587.26	7411.15	7823.16	2034.21	5457.54	4476.77	1.87036e+06	1.77535e+06	1.53129e+06	1.81667e+06	2.27956e+06	2.10289e+06	-	-
pme3967	C12H17N5O5	2-(Dimethylamino)guanosine	Nucleotides and derivatives	2140-67-2	904014	823914	854022	822484	754169	760215	2.04939e+06	1.09505e+06	2.13589e+06	377723	1.23236e+06	2.3436e+06	-	-
pme0109	C10H13NO4	Methyldopa	Amino acids and derivatives	555-30-6	314606	77355.3	116790	152609	54268.4	261451	1.69989e+06	1.94245e+06	1.22271e+06	1.04251e+06	1.54191e+06	2.02147e+06	C07194	-
pme3882	C9H12N2O5	2'-Deoxyuridine	Nucleotides and derivatives	951-78-0	23013.1	53471.5	22578.1	41877.2	42923.8	39066.5	65634.5	33206.2	44849.8	28898.8	39964.8	34566.6	C00526	ko00240,ko01100,ko01232,ko02010
MWS201447	C12H16N2O3	Phe-Ala	Amino acids and derivatives	3918-87-4	230808	157568	203116	382080	519463	431276	154233	151222	112808	72731.3	121824	140275	-	-
mws0102	C9H7NO2	Indole-5-carboxylic acid	Alkaloids	1670-81-1	45348.6	30386.4	21835.5	23074.1	30776.6	24413.7	57514.8	43738	36737.6	39768.5	30936.9	17891.6	-	-
Lmjp101403	C10H10O4	3ξ-(1ξ-Hydroxyethyl)-7-hydroxy-1-isobenzofuranone	Others	-	25537.5	114283	110281	112131	128534	156339	1.19742e+06	1.443e+06	1.68998e+06	3.20316e+06	4.42155e+06	4.67137e+06	-	-
mws0628	C7H6O2	4-Hydroxybenzaldehyde	Phenolic acids	123-08-0	3.71684e+06	2.03896e+06	1.96499e+06	3.93516e+06	3.56378e+06	3.82169e+06	2.18843e+06	2.49031e+06	2.52555e+06	3.36752e+06	4.18978e+06	4.90381e+06	C00633	ko01100
MWS201444	C7H13N3O4	Gln-Gly	Amino acids and derivatives	2650-65-9	14123839	1.81788e+07	2.02779e+07	1.79805e+07	1.95091e+07	1.71142e+07	2.19838e+07	1.18304e+07	2.25935e+07	2.00209e+07	2.52484e+07	2.35085e+07	-	-
Zmgn000173	C5H10O5	D-Ribose	Others	50-69-1	233183	242225	255988	483918	313438	317312	93497.7	71684.1	73069.1	27433.6	55532.6	31502.5	C00121	ko00030,ko01100,ko02010
pme3382	C6H11NO4	N-Acetyl-L-threonine	Amino acids and derivatives	17093-74-2	778131	591698	289530	190578	214728	238724	155522	189037	128156	177622	127791	140193	-	-
ML10180524	C9H13N3O5	Cytarabine	Nucleotides and derivatives	147-94-4	1.60304e+06	1.40176e+06	2.15147e+06	1.6296e+06	1.90232e+06	2.00284e+06	3.26311e+06	2.41995e+06	2.49127e+06	1.62579e+06	2.46613e+06	3.66358e+06	C02961	-
MWSmce118	C5H6N2O2	Imidazole-4-Acetic Acid	Alkaloids	645-65-8	533785	716401	611808	508716	567556	525287	1.49041e+06	1.6786e+06	1.22074e+06	1.31644e+06	842601	734020	C02835	ko00340,ko01100
MWSmce031	C15H20O3	Micheliolide	Terpenoids	68370-47-8	153406	155961	43102.3	20713.3	36096.8	35256	302383	343124	292188	148425	197641	179394	C09507	-
mws0976	C9H12N2O6	β-Pseudouridine	Nucleotides and derivatives	1445-07-4	43882.1	57220.5	57040.8	27421.7	31725	28417.6	112388	80013.3	101372	64069.2	58661.3	82348.8	C02067	ko00240,ko01100
MWSmce454	C8H8O3	3,5-Dihydroxyacetophenone	Phenolic acids	51863-60-6	53387.7	30750.4	31201.4	7248.5	11350.2	15494.1	382397	327761	419671	328544	391547	332105	-	-
mws0072	C21H20O10	Apigenin-5-O-glucoside	Flavonoids	28757-27-9	87295.6	148971	78576.9	146099	79797.6	33723.8	569537	747087	751812	534191	604194	547495	-	-
MWS0132	C20H32N6O12S2	Oxiglutatione	Amino acids and derivatives	27025-41-8	3.12933e+06	4.26069e+06	3.11381e+06	921113	1.40017e+06	1.25123e+06	230640	242860	137185	97177.8	121586	94979.6	C00127	ko00480,ko01100,ko01240
MWS1860	C4H9N	Pyrrolidin	Alkaloids	123-75-1	1.31529e+06	1.08674e+06	838221	797656	708818	796428	1.32999e+06	758837	1.15462e+06	355429	1.02314e+06	1.38378e+06	-	-
Zmdp000972	C4H9NO2S	S-Methyl-L-cysteine	Amino acids and derivatives	1187-84-4	1.3403e+06	885601	723199	520075	376814	490197	696991	427602	734927	293019	709856	720615	C22040	ko02010
MWSmce539	C18H34O4	Dibutyl sebacate	Lipids	109-43-3	12980.6	32586.7	9992.86	12467.6	29919.6	15912.2	97001.1	105429	78683.5	54652.2	103759	88902.7	-	-
MWS0687	C7H8N2O2	1-Methyl-6-Oxo-1,6-Dihydropyridine-3-Carboxamide	Alkaloids	701-44-0	76542.3	110618	135320	168636	124001	152681	381906	221357	302342	63785	240428	397835	-	-
MWS201424	C10H19N3O4	Ile-Asn	Amino acids and derivatives	59652-59-4	163712	204092	164795	269313	305795	269768	101577	77317.6	60322.7	44248.2	66479.2	81479.8	-	-
mws4176	C12H16N2O3	L-Alanyl-L-Phenylalanine	Amino acids and derivatives	3061-90-3	306889	288987	417818	600567	738759	614471	272355	184317	165131	137688	218527	196810	-	-
Wbmn009160	C30H48O5	Cannabifolin C	Terpenoids	-	1.62549e+06	1.45489e+06	825932	1.30123e+06	2.41075e+06	1.80611e+06	7.17986e+07	6.81012e+07	6.91294e+07	2.79736e+07	2.03768e+07	3.41152e+07	-	-
Hmln000873	C13H16O10	2-O-Galloyl-D-glucose	Phenolic acids	-	240443	956217	726455	36413.8	45602.9	23345.7	2.15142e+06	2.93788e+06	1.86641e+06	2.66571e+06	3.71526e+06	2.69322e+06	-	-
Zazp002547	C11H12N2O2	cyclo-(Gly-Phe)	Amino acids and derivatives	10125-07-2	5.633e+06	4.50573e+06	2.76186e+06	1.55119e+06	1.04062e+06	1.46819e+06	8.20014e+06	5.66017e+06	6.15499e+06	1.72851e+06	3.1976e+06	3.02266e+06	-	-
MWS2673	C20H34O4	5,6-DiHETrE[(±)5,6-dihydroxy-8Z,11Z,14Z-eicosatrienoic acid]	Lipids	213382-49-1	1.3934e+06	2.60094e+06	2.65799e+06	2.63521e+06	1.80657e+06	1.78031e+06	1.14032e+06	640674	903462	574747	1.01441e+06	897544	C14772	ko00590,ko01100
pmb2786	C18H30O3	9-Hydroxy-10,12,15-octadecatrienoic acid	Lipids	89886-42-0	151560	124367	529653	212259	195186	227603	12266.2	14782.7	11428.9	6165.03	6976.98	6550.95	C16326	ko00592
mws0192	C4H6O4	Succinic acid	Organic acids	110-15-6	1.80631e+07	1.29447e+07	1.59271e+07	2.60977e+07	3.28859e+07	3.25949e+07	7.87452e+07	3.64978e+07	5.95035e+07	5.35457e+07	9.46391e+07	9.95871e+07	C00042	ko00020,ko00190,ko00250,ko00310,ko00350,ko00360,ko00620,ko00630,ko00640,ko00650,ko00760,ko00920,ko01100,ko01110,ko01200
Zajn011785	C15H16O2	Mansonone C	Others	5574-34-5	1.95824e+06	1.96649e+06	2.06923e+06	2.2257e+06	1.92917e+06	2.36493e+06	15775.9	32707.2	33173.2	13252.3	26257.7	3809.05	C10371	-
mws0875	C5H10N2O3S	L-Cysteinyl-L-glycine	Amino acids and derivatives	19246-18-5	3.06373e+06	2.836e+06	2.52693e+06	3.64207e+06	3.36515e+06	2.91125e+06	13048.5	7808.74	13315	5784.62	16652.1	14519.8	C01419	ko00480,ko01100
mws0232	C17H20N4O6	Riboflavin (Vitamin B2)	Others	83-88-5	2.15164e+07	2.486e+07	3.29755e+07	3.33988e+07	2.55109e+07	3.05186e+07	3.36664e+06	3.2878e+06	4.80706e+06	1.3629e+06	3.95134e+06	5.93631e+06	C00255	ko00740,ko01100,ko01110,ko01240,ko02010
pmb2657	C10H18N4O6	Argininosuccinic acid	Organic acids	2387-71-5	55101.9	36608.5	56682.7	46630.4	33027	42595.4	85493.5	78062.4	52059.2	23192	32117.3	15358.9	C03406	ko00220,ko00250,ko01100,ko01110,ko01230
Lmbn002072	C7H12O4	2-Propylsuccinic acid	Organic acids	618-57-5	26367.7	27539.4	39576.5	5987.42	8187.47	53106	65173.5	39608.4	59158.6	8287.05	9490.66	16570	C16657	-
Zmgp002869	C21H26O6	5-hydroxy-1,7-bis (4-hydroxy-3-methoxyphenyl)-3-heptanone	Others	-	49945.8	25575.9	49613.5	69008.6	55649.2	76074.3	662611	949456	773218	273787	181615	115988	-	-
mws0396	C18H34O2	Elaidic Acid	Lipids	112-79-8	7.59426e+06	8.05454e+06	8.43478e+06	8.25796e+06	8.18893e+06	8.06387e+06	2.30784e+06	1.47135e+06	1.87681e+06	525283	1.63078e+06	2.27253e+06	C01712	-
mws0227	C6H13NO2	L-Leucine	Amino acids and derivatives	61-90-5	2.7883e+06	1.7899e+06	1.84706e+06	1.04601e+06	576455	771210	1.94772e+06	1.16102e+06	1.48844e+06	744085	1.87906e+06	2.49076e+06	C00123	ko00280,ko00290,ko00966,ko00970,ko01100,ko01110,ko01210,ko01230,ko02010
pme1119	C10H12N4O5	Inosine	Nucleotides and derivatives	58-63-9	18653.6	161587	120916	106658	237428	284604	286433	202174	233701	28355.7	313654	481287	C00294	ko00230,ko01100,ko01232,ko02010
Lmdn003756	C10H10O4	Methyl caffeate	Phenolic acids	3843-74-1	357409	2.00438e+06	1.70466e+06	852747	935507	1.09065e+06	58249.1	75954	51986.3	102286	26562.7	49198.9	C10477	-
mws0061	C21H20O12	Quercetin-3-O-galactoside (Hyperin)	Flavonoids	482-36-0	24623.4	8.75247e+06	220556	36500.1	29689.2	34397.6	46001.7	92142.9	49051.9	240658	252640	38579.2	C10073	-
Lmbn004790	C11H14O4	Methyl 3-(3-hydroxy-4-methoxyphenyl)propanoate	Phenolic acids	129150-61-4	2.72266e+06	2.67576e+06	1.65493e+06	479660	496613	426469	555125	472752	327311	300873	276354	457253	-	-
MWS201481	C10H20N2O3S2	Met-Met	Amino acids and derivatives	7349-78-2	93986.6	62524.5	104067	96800.5	99172.9	90495.3	52008.2	39618.1	46479.8	11448.3	58652	131284	-	-
MWSmce581	C7H6O3	2,4-Dihydroxybenzaldehyde	Others	95-01-2	10118.9	10322.8	8929.11	6975.42	8754.28	11339.8	172895	158426	191544	180394	221003	80984.9	-	-
MWS20627g	C9H12N2O2	L-Tyrosinamide	Amino acids and derivatives	4985-46-0	102332	168306	58692.2	67263.4	61294.1	83801.7	79416.7	75431.5	89903.5	36583.3	48144.6	60133.5	-	-
Lmhp002764	C11H18N2O2	Cyclo(Pro-Leu)	Amino acids and derivatives	5654-86-4	18629.8	19982.9	10681.4	23939	26171.9	28291.1	30603.1	23898	27140.3	31088.4	18317.3	17202.4	-	-
Lmtn002565	C14H18O9	1-O-Vanilloyl-D-Glucose	Phenolic acids	-	19547.5	109606	138436	29864.7	84616.3	20692.8	853092	812435	1.0469e+06	1.31124e+06	780650	722354	C20470	-
Lmcp002302	C12H17N5O5	N6-(2-Hydroxyethyl)adenosine	Nucleotides and derivatives	4338-48-1	729667	614306	663468	529789	456037	487170	1.39075e+06	851314	1.62653e+06	271906	950647	1.75652e+06	-	-
MWS5083	C17H21N4O9P	Flavin Single Nucleotide(FMN)	Nucleotides and derivatives	6184-17-4	402588	265636	305281	193978	161031	187769	445207	416514	443327	196666	435518	527362	C00061	ko00190,ko00740,ko01100,ko01110,ko01240
mws0242	C8H14O4	Suberic Acid	Organic acids	505-48-6	639227	592075	627566	1.22576e+06	1.24672e+06	1.24201e+06	135577	142664	196326	118205	128218	135383	C08278	-
MWS1846	C8H8O3	Phenoxyacetic acid	Phenolic acids	122-59-8	18053.5	10144	18198.5	30425.8	42534	47541.7	388773	361476	468492	409138	517193	434916	C02181	-
Hmcp002399	C23H24O13	Limocitrin-3-O-glucoside	Flavonoids	-	57978.7	48363.4	18137.7	83531.7	85035.4	89235.4	2.16657e+06	2.76111e+06	2.89205e+06	973025	1.9457e+06	2.08699e+06	-	-
Lmtn002796	C21H22O11	Aromadendrin-7-O-glucoside	Flavonoids	28189-90-4	9	9	9	97324.6	98635.9	144295	1.3314e+06	1.39166e+06	851567	648782	655023	508897	-	-
pma0134	C4H8O4	D-Threose	Others	95-43-2	393335	293162	555975	343305	245297	313361	1.08704e+06	991400	1.21382e+06	491761	519991	508087	C06463	-
mws0736	C8H16N2O3	N-Glycyl-L-leucine	Amino acids and derivatives	869-19-2	500892	560258	721736	1.19054e+06	1.41153e+06	1.23063e+06	361801	302438	410451	168397	278711	197863	C02155	-
Lmyp010262	C15H12O4	2-Acetoxymethyl-anthraquinone	Quinones	-	4.80988e+06	3.98772e+06	4.78012e+06	1.24534e+07	1.20797e+07	1.09092e+07	47754.1	70322.4	102240	19530.3	20798.7	38308.5	-	-
mws1574	C16H22O10	Geniposidic acid	Terpenoids	27741-01-1	125029	173733	271668	150137	166025	151419	179604	44350.6	201121	29125.5	53145.5	174636	C11673	ko00902,ko01110
MWSmce584	C8H11NO	L-Tyramine	Alkaloids	51-67-2	388127	119071	162214	140872	100469	102743	37921.4	32399.7	26565.1	36498.4	17116.9	25603.7	C00483	ko00350,ko00950,ko01100,ko01110,ko01240
MWS00330g	C5H9NO2	1-Amino-1-cyclobutane-carboxylic-acid	Amino acids and derivatives	22264-50-2	4.63015e+06	2.69723e+06	2.3885e+06	1.86437e+06	1.35795e+06	1.45747e+06	2.70524e+06	1.36548e+06	2.12579e+06	492198	3.70595e+06	5.41687e+06	-	-
MA10107783	C10H8O5	3-[(1-Carboxyvinyl)oxy]benzoic acid	Phenolic acids	16929-37-6	7734.9	6252.93	28516.5	6379.12	5008.64	8110.34	340595	407800	492575	525475	807254	919962	C20772	ko00130,ko01100,ko01110,ko01240
ML10172161	C3H4O4	Hydroxypyruvic acid	Organic acids	1113-60-6	1.09841e+06	2.29826e+06	1.57143e+06	1.25184e+06	1.2896e+06	1.20823e+06	726349	604529	458396	402368	696722	612074	C00168	ko00260,ko00630,ko01100,ko01110,ko01200
MWSHY0165	C22H24O10	Isosakuranetin-7-O-glucoside (Isosakuranin)	Flavonoids	491-69-0	7749.45	36457.7	11172.7	25584	10233.9	8658.26	209305	290381	234063	236801	534883	612363	-	-
pmf0250	C28H42O2	γ-Tocotrienol	Others	14101-61-2	207110	185810	178950	168324	178307	190638	223873	273731	236431	238669	166302	252512	C14155	ko00130,ko01100,ko01110
Lmsn002887	C14H16O8	1-O-Caffeoyl-β-D-xylose	Phenolic acids	-	24591.9	36305.1	40724.5	49772.7	48485.9	35976.4	521869	534174	830513	215444	466115	426524	-	-
pme1738	C7H9N2O	3-Carbamyl-1-methylpyridinium;(1-Methylnicotinamide)	Alkaloids	1005-24-9	1.35224e+07	3.40998e+06	4.77249e+06	4.22911e+06	2.24863e+06	2.24331e+06	139242	172156	202505	142738	109489	161842	C02918	ko00760,ko01100
Lmwp102904	C13H18N2O	N,N-Dimethyl-5-methoxytryptamine	Alkaloids	1019-45-0	453610	144334	87202.6	85968.7	176850	189743	481952	722954	703524	506794	395815	226296	C08309	-
Lskp211472	C30H46O6	2,3,19-Trihydroxy-24-oxo-olean-12-en-28-oic acid	Terpenoids	-	4318.54	6134.69	12787.1	12610.2	24823.8	15189.6	752489	777046	738990	298227	468849	530032	-	-
pme3009	C6H6O6	Trans-Citridic acid	Organic acids	4023-65-8	316510	168436	192154	135124	65168.5	94768.8	70584	156586	64726.2	70196.4	25095.6	4231.19	C02341	ko00660,ko01100
pme2828	C6H5NO3	4-Nitrophenol	Phenolic acids	100-02-7	5.49435e+07	3.69915e+07	3.63307e+07	2.83358e+07	1.03544e+07	1.77718e+07	1.34203e+07	2.56357e+07	1.00769e+07	1.70618e+07	4.72369e+06	1.80513e+06	C00870	-
pme1730	C4H6O4	D-Erythronolactone	Organic acids	15667-21-7	1.06322e+06	643729	548308	627240	560379	626587	313912	239634	276845	169299	210537	224517	-	-
pme0193	C5H10N2O3	L-Glutamine	Amino acids and derivatives	56-85-9	134397	298606	278728	315549	462805	298457	3.82421e+06	3.95188e+06	2.37252e+06	500175	633454	733711	C00064	ko00220,ko00230,ko00240,ko00250,ko00470,ko00630,ko00750,ko00910,ko00970,ko01100,ko01230,ko01232,ko01240,ko02010
Lmhp009187	C20H42NO7P	LysoPE 15:0	Lipids	-	372896	1.05086e+06	700029	218983	267334	289098	2.23606e+06	1.36904e+06	2.1113e+06	612042	1.09162e+06	1.87707e+06	-	-
Lmhp010394	C30H54NO7P	LysoPC 22:4	Lipids	-	8264.15	81892.8	28698.2	20837.9	26055	50294.9	264810	109223	151711	44563.4	111362	96544.7	-	-
MWS201469	C11H21N5O5	Glu-Arg	Amino acids and derivatives	7219-59-2	98434.1	137016	102258	83375.9	123801	103323	72011	104628	98315.5	48894.6	101081	85453.8	-	-
Lmtp007747	C15H22O2	Santalic acid	Terpenoids	73590-17-7	2.44959e+06	3.06128e+06	919620	815029	909224	488699	9	9	9	9	9	9	-	-
pme1086	C10H17N3O6S	Glutathione reduced form	Amino acids and derivatives	70-18-8	1.78354e+07	1.55776e+07	1.32466e+07	6.53186e+06	6.71441e+06	7.04477e+06	54161.8	80374.3	69830.5	103092	75288.9	122301	C00051	ko00270,ko00480,ko01100,ko01240,ko02010
Lmbn001676	C6H10O4	3-Hydroxy-3-Methyl-2-Oxopentanoic Acid	Organic acids	-	34370.2	44487.2	49387	158499	130591	143303	109803	68667.7	45822.2	50060.5	106546	132209	C14463	ko00290,ko01110,ko01210
MWS5136	C6H10O4	Mono-Methyl Glutarate	Organic acids	1501-27-5	34370.2	44487.2	49387	158499	130591	143303	109803	68667.7	45822.2	50060.5	106546	132209	-	-
mws2623	C18H34O2	11-Octadecanoic acid(Vaccenic acid)	Lipids	506-17-2	7.55717e+06	8.24414e+06	8.35598e+06	8.41914e+06	7.63411e+06	7.90224e+06	2.42015e+06	1.47126e+06	1.94356e+06	516666	1.71193e+06	2.38971e+06	C21944	-
Zmgn000217	C5H6O4	Methylenesuccinic acid	Organic acids	97-65-4	2.04453e+06	832850	770141	1.31931e+06	1.19749e+06	1.14836e+06	61861.9	40198	77371.6	45457.9	70621.2	91827	C00490	ko00660,ko01100
mws4052	C4H7NO2	1-Aminocyclopropane-1-carboxylic acid	Organic acids	22059-21-8	219426	297351	345655	309014	254676	334964	871465	680380	613520	273418	460518	215155	C01234	ko00270,ko01100,ko01110
mws1051	C15H23N6O5S+	S-Adenosylmethionine	Amino acids and derivatives	485-80-3	8.61442e+06	8.21704e+06	6.69963e+06	3.30494e+06	3.61164e+06	3.72551e+06	471260	253279	530329	117556	457940	321181	-	-
MWSmce697	C8H10O2	4-Ethoxyphenol	Phenolic acids	622-62-8	38218.6	27214	12408	11572.1	10580	18481.6	2.4436e+06	2.13353e+06	2.01442e+06	2.65825e+06	2.36914e+06	2.0042e+06	-	-
pmn001690	C16H24O7	3-Hydroxy-4-isopropylbenzylalcohol-3-O-glucoside	Phenolic acids	-	1.30677e+06	1.21248e+06	1.30115e+06	608986	557321	561128	209230	97994.4	164716	106745	128558	142425	-	-
pmd0136	C26H54NO7P	LysoPC 18:0(2n isomer)	Lipids	-	4.35192e+06	3.449e+06	4.51351e+06	2.6041e+06	2.97092e+06	3.05204e+06	3.16846e+07	3.23231e+07	3.62227e+07	1.15244e+07	2.0969e+07	2.63812e+07	-	-
MWSHY0021	C17H14O5	Apigenin-7,4'-dimethyl ether	Flavonoids	5128-44-9	6240.05	2698.12	5597.37	8679.04	4005.09	5507.06	191675	212713	157540	244455	417641	570443	C10019	-
Lmhp010190	C26H52NO7P	LysoPC 18:1(2n isomer)	Lipids	-	4.74127e+06	1.00351e+07	9.64752e+06	8.86861e+06	7.34508e+06	8.1586e+06	1.00551e+07	5.42182e+06	7.86498e+06	3.67587e+06	1.36331e+07	1.61663e+07	-	-
Hmqp006235	C26H46NO7P	LysoPC 18:4	Lipids	-	236484	406071	358505	172123	157051	522298	752913	771523	1.14178e+06	480876	1.80363e+06	1.48384e+06	-	-
mws1629	C15H22O9	Aucubin	Terpenoids	479-98-1	1.16948e+06	1.3963e+07	1.04004e+07	9	9	9	33416	40438.3	32956.8	27853.1	23231.6	19801.9	C09771	-
pmb0865	C26H48NO7P	LysoPC 18:3(2n isomer)	Lipids	-	2.37811e+06	5.7687e+06	4.43103e+06	4.6262e+06	3.58538e+06	4.71902e+06	6.59631e+06	4.79984e+06	6.17578e+06	3.67747e+06	1.03585e+07	1.10731e+07	-	-
mws3133	C7H11NO4	Oxaceprol	Amino acids and derivatives	33996-33-7	197539	238301	238465	242199	196139	245775	600111	507966	437379	154944	335143	345583	-	-
mws0275	C4H6O5	L-Malic acid	Organic acids	97-67-6	1.03982e+06	508190	511599	1.24649e+06	1.33727e+06	1.15681e+06	635065	528077	1.01474e+06	952150	1.25265e+06	997536	C00149	ko00020,ko00620,ko00630,ko00710,ko01100,ko01110,ko01200
pme3011	C4H9NO2	γ-Aminobutyric acid	Organic acids	56-12-2	1.54047e+06	1.50838e+06	1.80407e+06	754036	1.46823e+06	1.10804e+06	3.91573e+06	2.6388e+06	3.41471e+06	1.32324e+06	2.48195e+06	2.35691e+06	C00334	ko00250,ko00330,ko00410,ko00650,ko00760,ko01100
Lmbn005487	C18H34O4	12,13-DHOME; (9Z)-12,13-Dihydroxyoctadec-9-enoic acid	Lipids	263399-35-5	1.36797e+06	1.71842e+06	1.63677e+06	4.7687e+06	4.52252e+06	6.11293e+06	63833.6	59390.7	80550.8	55884.1	69512.6	56412.7	C14829	ko00591
MWS2070	C10H12O3	Propyl 4-hydroxybenzoate	Phenolic acids	94-13-3	42695.4	41229.9	44100.9	248074	245296	149649	97981.6	118881	198438	36202	29373.1	26603.5	-	-
MWS2050	C3H9NO	1-Aminopropan-2-ol	Alkaloids	78-96-6	55175.6	51642.8	68189	58065.5	49876.6	43299.6	34731.7	37963.3	40560.4	34541.8	20729.8	24943	C05771	-
MWS0812	C3H9NO	Trimethylamine N-Oxide	Alkaloids	1184-78-7	55175.6	51642.8	68189	58065.5	49876.6	43299.6	34731.7	37963.3	40560.4	34541.8	20729.8	24943	C01104	ko01100
Lmbn000193	C3H4O4	Tartronate semialdehyde	Organic acids	2480-77-5	1.11406e+06	2.16752e+06	1.49894e+06	1.23827e+06	9	1.14657e+06	809940	783773	542356	497353	786925	782510	C01146	ko00053,ko00630,ko01100
mws2212	C9H8O4	Caffeic acid	Phenolic acids	331-39-5	4182.8	17319.2	30762.5	5329.6	9031.73	5752.91	1.20133e+07	1.06294e+07	1.07631e+07	8.32422e+06	1.36826e+07	1.68131e+07	C01197	ko00940,ko01100,ko01110
MWSslk126	C16H14O3	2'-Hydroxy-2-methoxychalcone	Flavonoids	42220-77-9	196813	105659	268724	128141	272799	270438	518066	450137	357560	736141	784678	720091	-	-
mws0397	C20H30O2	Cis-5,8,11,14,17-Eicosapentaenoic Acid	Lipids	10417-94-4	12358.9	274324	365493	369462	91637.8	180870	162157	82306.8	122364	22051.8	104482	167923	C06428	ko01040
MWSmce341	C16H22O4	Butyl isobutyl phthalate	Phenolic acids	17851-53-5	3.32537e+07	2.81053e+07	3.19176e+07	3.68391e+07	2.24241e+07	3.40206e+07	2.24659e+07	5.16532e+07	2.39709e+07	1.82277e+07	2.92493e+07	2.98654e+07	-	-
MWSmce467	C9H10O2	4-Allylcatechol	Phenolic acids	1126-61-0	3685.52	4679.74	4026.18	3875.08	2209.82	2376.46	8387.64	8993.41	10165	40494	15752.2	10125.5	-	-
MWS3165	C10H15NO5	3-Methoxy-L-Tyrosine	Amino acids and derivatives	200630-46-2	27163.8	29672.8	22089.8	38255.2	32801.2	35347	99083	100513	104623	39751.8	64748.1	71821.4	-	-
MWS201388	C9H15N3O5	Asn-Hyp	Amino acids and derivatives	844640-50-2	78508.6	115702	118321	137553	72063.3	92306	119190	114619	123787	160428	138777	153284	-	-
Zmgn004894	C8H8O3	Methyl 4-hydroxybenzoate	Phenolic acids	99-76-3	602000	315401	449851	1.14698e+06	933658	788807	764582	1.02071e+06	686938	1.25851e+06	949313	672583	-	-
pme1605	C27H30O15	Kaempferol-3-O-robinobioside(Biorobin)	Flavonoids	17297-56-2	5.80922e+06	11135.8	45324.3	15672.5	11169.5	11578.8	9	9	9	9	9	9	-	-
Smgp004575	C21H20O12	Quercetin-5-O-β-D-glucoside	Flavonoids	-	63850.6	3.99132e+06	200859	9	9	9	372020	102384	309177	304046	296712	296538	-	-
MWSHY0046	C21H20O12	Quercetin-3-O-glucoside (Isoquercitrin)	Flavonoids	482-35-9	63850.6	3.99132e+06	200859	9	9	9	372020	102384	309177	304046	296712	296538	C05623	ko00944,ko01100,ko01110
mws0103	C9H7NO	Indole-3-carboxaldehyde	Alkaloids	487-89-8	388729	322880	325908	506640	522594	523069	710155	635956	512263	308424	471401	932970	C08493	-
pme0257	C4H4N2O2	Uracil	Nucleotides and derivatives	66-22-8	1.35176e+06	1.36683e+06	1.52483e+06	1.87191e+06	2.10722e+06	1660448	723351	531516	572183	398277	667026	680265	C00106	ko00240,ko00410,ko00770,ko01100,ko01232
Lhdp102528	C30H46O4	3-Oxo-19-hydroxyurs-12-en-28-oic acid (Pomonic acid)	Terpenoids	13849-90-6	175787	15194.9	217864	9	9	9	3.83982e+06	3.82578e+06	4.36566e+06	2.1604e+06	2.27521e+06	3.06909e+06	-	-
MWSslk106	C8H11N	2-Phenylethylamine	Alkaloids	156-28-5	156460	58479.1	41548.8	78854	30738.1	90854.4	79736.2	74398.9	90088.5	50112.5	29825.2	53188	C05332	ko00360,ko01100
Lmtn002324	C19H28O11	Benzyl-(2''-O-glucosyl)glucoside	Phenolic acids	-	235409	454240	295716	144383	165884	146534	324274	313827	267167	348791	392054	264456	C17564	-
pmb0863	C24H46NO7P	LysoPC 16:2(2n isomer)	Lipids	-	22817.5	97073.6	79274.3	82130.1	50376.4	84043.6	1.51552e+06	965273	1.40534e+06	532250	3.31993e+06	3.55794e+06	-	-
mws0574	C4H8O3	2-Hydroxyisobutyric acid	Organic acids	594-61-6	15696	6441.54	13802.6	13511.4	12024.7	12663.4	39084.3	33394.9	43322.7	23303	17516.1	22703.2	C21297	-
mws0206	C4H8O3	2-Hydroxybutyric Acid	Organic acids	3347-90-8	15696	6441.54	13802.6	13511.4	12024.7	12663.4	39084.3	33394.9	43322.7	23303	17516.1	22703.2	C05984	ko00640
mws0847	C6H7N5	1-Methyladenine	Nucleotides and derivatives	5142-22-3	530446	402677	591608	358316	275973	310080	632061	420799	413999	495294	430758	500897	C02216	-
Lmyp010766	C15H10O3	3-Hydroxy-2-methyl-anthraquinone	Quinones	-	417840	623628	897846	173169	121149	197387	185533	148678	259275	57831.4	132678	131320	-	-
Cmsp002787	C11H14O5	3,4'-Dihydroxy-3',5'-dimethoxypropiophenone	Phenolic acids	136196-47-9	1.11337e+06	825694	593313	645063	604233	605479	3.82762e+06	3.68912e+06	3.33077e+06	4.8008e+06	5.17715e+06	5.11639e+06	-	-
Zbdp002220	C14H20O9	2,6-Dimethoxypydroquinone-1-O-glucoside	Flavonoids	-	206439	232243	169518	9	9	9	339117	357126	313234	307290	387261	300918	-	-
MWS2684	C20H30O3	12-HEPE; 12-Hydroxy-5,8,10,14,17-eicosapentaenoic acid	Lipids	81187-21-5	5841.64	1873.86	3564.27	1646.28	4102.15	4137.43	7461.79	8747.25	6391.46	18530.6	55097.5	59258.5	-	-
pme2459	C21H20O11	Luteolin-7-O-glucoside (Cynaroside)	Flavonoids	5373-11-5	405829	2.13133e+06	440611	194296	184062	200368	448430	510769	336105	486908	358006	340496	C03951	ko00944
MWS201455	C10H19N3O5	Asp-Lys	Amino acids and derivatives	5891-51-0	380809	449556	415072	755652	767333	684943	663197	548290	819856	134422	260335	302549	-	-
mws0749	C7H6O3	4-Hydroxybenzoic acid	Phenolic acids	99-96-7	326748	233820	232980	308936	309940	271644	3.08343e+06	2.96177e+06	2.74791e+06	2.49082e+06	2.63939e+06	2.91809e+06	C00156	ko00130,ko00790,ko01100,ko01110,ko01240
Lmbn007891	C18H34O4	Hydroxy ricinoleic acid	Lipids	-	21548.2	17517.9	18746.1	22222.4	34744.3	30506	123211	119783	61211.6	24131.3	21760.4	22700.6	-	-
mws1358	C6H6O2	Pyrocatechol	Phenolic acids	120-80-9	6674.44	14939.7	42046.5	11430.9	25123.4	6048.4	3.58644e+06	2.97713e+06	3.64786e+06	3.24061e+06	3.86541e+06	2.79896e+06	C00090	ko01100
pmb1912	C20H23N7O7	10-Formyltetrahydrofolic Acid	Alkaloids	2800-34-2	2.28833e+06	1.70794e+06	1.71833e+06	1.43306e+06	1.61658e+06	1.56654e+06	897171	1.2057e+06	1.07936e+06	975628	1.65374e+06	1.94661e+06	C00234	ko00670,ko00970,ko01100,ko01200,ko01240
MWS20966	C7H15N3O2S	S-methyl-L-thiocitrulline	Amino acids and derivatives	209589-59-3	145940	189766	160829	208141	179495	212207	120574	197262	173506	230617	150557	163470	-	-
pme2125	C18H32O16	Raffinose	Others	512-69-6	94773.4	133863	223344	135305	167581	246026	1.484e+07	1.28647e+07	1.07869e+07	8.53645e+06	1.33766e+07	1.22986e+07	C00492	ko00052,ko01100,ko02010
pme2529	C6H12O5	1,5-Anhydro-D-glucitol	Others	154-58-5	1.21401e+06	1.40248e+06	2.37964e+06	1.28714e+06	1.63617e+06	1.33003e+06	9	9	9	19593.5	6372.1	5937.82	C07326	-
mws0018	C10H26N4	Spermine	Alkaloids	71-44-3	844424	1.01736e+06	834697	839820	967185	977731	940979	892249	949754	579819	909891	1.03734e+06	C00750	ko00330,ko00410,ko00480,ko00770,ko01100,ko01240
Zmbp002538	C11H12N2O2	1-Methoxy-indole-3-acetamide	Alkaloids	-	5.36556e+06	4.04194e+06	2.46568e+06	1.43172e+06	928626	1.15936e+06	7.32004e+06	5.51611e+06	5.75905e+06	1.46018e+06	2.89767e+06	2.586e+06	-	-
pmb2654	C19H27NO12	Anthranilate-1-O-Sophoroside	Phenolic acids	-	11622.5	8682.48	13020.5	5453.37	5555.66	11692.5	106191	113277	56382.5	12129.6	38753	47427	-	-
pme0253	C8H15NO3	N-Acetyl-L-leucine	Amino acids and derivatives	1188-21-2	30431.5	22129.9	23418.1	20009.9	9667.42	12637.9	28627.9	34017.9	36117.6	28953.4	26969.8	30170.6	C02710	-
pmn001643	C26H34O10	Isolariciresinol-9'-O-rhamnoside (Aviculin)	Lignans and Coumarins	156765-33-2	4370.23	12774.4	1179.11	932.937	4566.61	656.116	689235	692979	593045	148619	292555	342778	-	-
MWS1777	C6H6ClN	3-Chloroaniline	Alkaloids	108-42-9	1.65799e+07	1.58892e+07	1.32217e+07	1.37926e+07	1.12981e+07	1.23372e+07	1.37868e+06	992615	1.14431e+06	1.62616e+06	1.15481e+06	818038	-	-
mws0444	C7H7NO3	3-Aminosalicylic acid	Phenolic acids	570-23-0	212060	265728	310664	227713	288689	282850	92837.8	53037	90020.1	55082.1	50710.4	67651	-	-
pmb3068	C16H18O8	1-O-p-Coumaroylquinic acid	Phenolic acids	-	382132	1.29935e+07	27271.4	7762.75	7807.65	12509	61250.2	82917.7	74334.7	120584	86946.1	96287.5	-	-
MWS201461	C12H25N5O3	Leu-Arg	Amino acids and derivatives	26607-15-8	307925	303680	380115	659314	681285	577269	128656	102372	134059	156634	32361.1	99236.3	-	-
pmb2991	C33H40O19	Apigenin-7-O-glucoside-4'-O-rutinoside	Flavonoids	-	75056.6	123418	133835	93547.7	119017	123047	10877.7	6911.55	4033.99	9	3033.41	9267.11	-	-
mws0856	C21H20O12	Quercetin-4'-O-glucoside (Spiraeoside)	Flavonoids	20229-56-5	51210.9	5.5562e+06	146809	40361.9	32313.8	33135.7	113466	151707	138458	224842	249118	137997	-	-
pmp001270	C24H48NO7P	LysoPC 16:1	Lipids	76790-27-7	49937.5	191303	103294	126806	104367	127381	499150	252436	434276	164603	1.16508e+06	1.42016e+06	-	-
Zmjn004133	C18H32O4	9S-Hydroperoxy-10E,12Z-octadecadienoic acid	Lipids	5502-91-0	2.26161e+06	3.13749e+06	2.98564e+06	4.94655e+06	5.50317e+06	5.39028e+06	2.05634e+06	2.97612e+06	1.35559e+06	407689	427369	544679	C14827	ko00591,ko01100
mws0474	C12H22O4	Dodecanedioic aicd	Lipids	693-23-2	7578.63	9712.18	10308.7	9266.64	8727.96	7235.8	8983.71	3992.75	14037.8	6090.11	11701.9	3487.6	C02678	-
Lmxn008550	C36H58O11	Pruvuloside B	Terpenoids	-	9	9	9	1728.19	3024.18	615.884	53744.2	55604.1	55422.8	41570.9	38784.1	41923	-	-
MWSmce017	C9H6O4	Daphnetin	Lignans and Coumarins	486-35-1	77420.4	43258.7	64919.3	71874.4	44777.1	70303.5	4.8641e+06	6.15278e+06	9.25551e+06	1.3478e+07	9.15261e+06	1.0217e+07	C03093	-
Zmjn001813	C7H12O4	Pimelic acid	Organic acids	111-16-0	33379.2	32552.1	41004.1	67633	70233.5	5474.32	164365	163158	248343	39352	81899.2	77690.9	C02656	ko00780,ko01100,ko01240
pmb2970	C28H34O16	Hesperetin-5,7-di-O-glucoside	Flavonoids	-	3.5572e+06	1.99517e+06	555878	422728	731414	613821	58263.5	70552.5	13712.8	43689.3	40031.9	27780.7	-	-
MWStz091	C8H12N2O2	Cyclo(L-Ala-L-Pro)	Amino acids and derivatives	36357-32-1	64221	103260	76768.1	43723	52997	59958.2	57068.6	64020.5	90003.1	84230.3	50143.2	105026	-	-
Lmdn001925	C26H34O12	Olivil-4'-O-glucoside	Lignans and Coumarins	76880-93-8	261281	486571	314535	25408.8	36185.7	30460.9	61495.1	51749.1	139006	120715	229230	141275	-	-
pme0256	C5H4N4O2	Xanthine	Nucleotides and derivatives	69-89-6	26060	48964.8	45278.2	47748.4	65331.2	48090.7	278099	292932	218316	217790	297875	303905	C00385	ko00230,ko00232,ko01100,ko01110,ko01232
MWSmce240	C9H17NO	Triacetonamine	Alkaloids	826-36-8	358773	454064	424951	386994	401338	304353	24712.9	44239.8	35470.5	18118.5	28130.6	23877.7	-	-
pme3351	C6H11NO3	Allysine(6-Oxo DL-Norleucine)	Amino acids and derivatives	1962-83-0	49919.6	6386.82	63135.7	32337.2	20958.7	32668.5	137933	101210	186719	19554.9	34108.7	98805	C04076	ko00300,ko00310,ko00960,ko01100,ko01110,ko01230
pmc0066	C10H13N4O7P	2'-Deoxyinosine-5'-monophosphate	Nucleotides and derivatives	3393-18-8	3.39478e+06	371234	158928	4.07469e+06	3.61268e+06	4.78083e+06	48349.7	122007	52908.7	2.61467e+06	60356.2	101668	C06196	ko00230,ko01232
Lmbn013410	C14H22O	2,4-Di-Tert-Butylphenol	Phenolic acids	96-76-4	23260	23696.4	23465.8	25056.5	15261.3	20118.8	248443	201697	182645	126901	162577	197877	-	-
mws2184	C11H12O4	Ethyl caffeate	Phenolic acids	102-37-4	6714.22	11278.3	13843.5	16396.2	14614.8	15655.4	262007	236243	177564	114299	116821	129361	-	-
pmb0981	C10H14N5O7P	Adenosine 5'-monophosphate	Nucleotides and derivatives	61-19-8	1.81693e+06	1.38907e+06	1.76332e+06	1.49853e+06	1.9582e+06	1.74728e+06	305394	224167	268193	174246	204665	177664	C00020	ko00230,ko00908,ko01100,ko01110,ko01232,ko01240
mws0005	C10H12N2	Tryptamine	Alkaloids	61-54-1	174988	75845.6	64689.1	42399.2	14061.8	23319.1	148164	105389	178193	69431.9	77914.8	59162.4	C00398	ko00380,ko00901,ko01100,ko01110
Wbtn004362	C18H16O10	1,3,6,7-tetrahydroxy-2-(3,4,5-trihydroxyoxan-2-yl)xanthen-9-one	Flavonoids	-	11640.6	13400.1	156132	11454.9	22683.8	20375.3	1.76152e+06	1.85294e+06	2.55247e+06	1.35033e+06	2.01544e+06	3.26427e+06	-	-
mws4017	C20H30O	Ferruginol	Terpenoids	514-62-5	95541.2	153106	88800.9	91732	73123.3	84678	592404	349368	703253	196904	184441	159393	C09092	ko00904,ko01110
Qaxp004683	C22H30O14	Arillatose B	Phenolic acids	137941-45-8	54436.1	41607.1	70197.5	21786.3	75909.9	59712.8	2.77676e+06	2.47421e+06	1.66626e+06	1.20037e+06	909529	575420	-	-
Zmgp003208	C20H24O5	5-hydroxy-1-phenyl-7-(3,4-dihydroxy-5-methoxyphenyl)-3-heptanone	Others	-	24600.2	19734.2	28267.4	160490	236560	310978	2.38092e+06	2.01522e+06	1.61999e+06	643475	627625	470446	-	-
MWS20152	C22H26O8	Syringaresinol	Lignans and Coumarins	21453-71-4	347983	210414	102086	74640.1	138726	66430.4	189771	176489	138432	193284	84228.1	89488.3	C10889	-
Wbtp007427	C19H16O6	7,10-dihydroxy-12-methoxy-2,2-dimethyl-1,11-dioxatetracen-6-one	Others	-	1.0675e+06	1.27086e+06	894908	717747	699626	798329	705702	1.54352e+06	1.27042e+06	713391	698570	479719	-	-
pmb0496	C15H22N4O3	N-Feruloylagmatine	Alkaloids	-	9.98037e+06	4.57879e+06	5.38646e+06	3.74339e+06	3.72688e+06	4.16627e+06	694917	740720	874808	368998	696723	801269	C18325	ko00330,ko01100
Lmhp010515	C25H52NO7P	LysoPC 17:0(2n isomer)	Lipids	-	75369.4	570042	153128	95150.8	110217	161612	952014	455241	743143	264334	875469	1.25423e+06	-	-
pme2289	C20H30O	Retinol (Vitamin A1)	Others	68-26-8	204109	345041	247115	872372	1.10391e+06	401037	538907	494857	438056	274482	332986	372101	C00473	ko01100,ko01240
Lmhp002031	C12H24N2O3	L-Leucyl-L-Leucine	Amino acids and derivatives	3303-31-9	443295	463703	753124	807941	868740	853255	467540	416656	290500	198705	365259	297663	-	-
mws0289	C23H46NO7P	LysoPE 18:1	Lipids	89576-29-4	1.11042e+06	2.63373e+06	1.37727e+06	1.98896e+06	1.20649e+06	1.30196e+06	1.01433e+06	344103	600478	256392	642777	581296	-	-
Lmhp008763	C21H42NO7P	LysoPE 16:1(2n isomer)	Lipids	-	344376	1.18852e+06	1.24345e+06	969214	1.2095e+06	2.18398e+06	4.83181e+06	3.11971e+06	3.99843e+06	3.11682e+06	9.67172e+06	1.72851e+07	-	-
Hmdn001667	C20H16O13	Ellagic acid-4-O-glucoside	Tannins	-	44450	74131.6	117017	27089.8	59242.6	112536	84472.4	109643	104314	26597.9	94760.4	41439.9	-	-
mws5035	C15H22N2O3	L-Leucyl-L-phenylalanine	Amino acids and derivatives	56217-82-4	424628	502008	668338	928345	969688	907165	511911	456131	372555	182063	362508	455625	-	-
pme0026	C6H14N2O2	L-Lysine	Amino acids and derivatives	56-87-1	102727	290217	416375	320193	498422	294557	4.40194e+06	4.2957e+06	2.6869e+06	517136	662118	803844	C00047	ko00300,ko00310,ko00470,ko00780,ko00960,ko00970,ko01100,ko01110,ko01210,ko01230,ko02010
Zmdp000917	C6H13N3O2	δ-Guanidinovaleric acid	Organic acids	462-93-1	92806.3	77626.4	56242.3	50042.1	37746.7	36907	86443.3	65421.4	95524.2	38801.4	129960	225583	-	-
Lmhp008801	C23H42NO7P	LysoPE 18:3	Lipids	-	1.09117e+06	1.92716e+06	1.80999e+06	1.84845e+06	1.24459e+06	1.96483e+06	2.73175e+06	2.29825e+06	2.88038e+06	1.16204e+06	2.33888e+06	2.58811e+06	-	-
Hmmn002544	C16H20O9	Ferulic acid-4-O-glucoside	Phenolic acids	117405-51-3	84287.3	102205	90061.3	43560.7	45529.8	25656.9	554453	609223	657242	646066	1.05185e+06	953496	-	-
pmp001244	C14H20NO4+	Caffeoylcholine	Alkaloids	87189-10-4	31688.8	32853.4	33717.4	19816.7	43369.3	49683	387844	359621	517240	490958	604288	649630	-	-
pme1216	C6H5NO2	2-Picolinic acid	Organic acids	98-98-6	126004	177552	163409	131096	110743	114399	467481	334359	504754	252459	333671	453452	C10164	ko00380,ko01100
Hmtn001120	C14H20O8	5-(2-Hydroxyethyl)-2-O-glucosylphenol	Phenolic acids	-	318403	840586	1.67431e+06	663570	718570	618067	87784.4	128172	154695	86876.2	109420	119751	-	-
Lmmn002274	C26H34O11	Isolariciresinol-9'-O-glucoside	Lignans and Coumarins	63358-12-3	437385	102838	150023	106929	79775.5	85003.3	3.32402e+06	3.96457e+06	3.7938e+06	4.97975e+06	7.39296e+06	6.27005e+06	-	-
pmf0470	C5H9NO3	cis-4-Hydroxy-D-proline	Amino acids and derivatives	2584-71-6	251289	281841	307511	280970	285387	235198	756604	648180	562672	219184	612886	636989	C03440	ko00470,ko01100
Lmcn009539	C19H34O2	E,E,Z-1,3,12-Nonadecatriene-5,14-diol	Lipids	-	5.97541e+06	6.71885e+06	7.8885e+06	1.239e+07	1.38241e+07	1.44247e+07	8.94477e+06	9.8513e+06	1.85641e+07	5.01077e+06	8.61952e+06	6.43209e+06	-	-
MWS5173	C4H5N3O	Isocytosine	Nucleotides and derivatives	108-53-2	75835	98351.5	77977.7	115329	95040	96795.6	1.97735e+06	1.35853e+06	1.60848e+06	274994	1.40081e+06	1.91136e+06	-	-
Lskp211491	C30H46O5	2,3,23-Trihydroxyurs-12,19(29)-dien-28-oic acid	Terpenoids	-	6473.81	17153.1	28933.1	11154.5	9936.29	40436	1.7032e+06	1.71909e+06	1.70822e+06	556165	767523	724800	-	-
pme2827	C16H32O	Palmitaldehyde	Lipids	629-80-1	1.2352e+07	1.26465e+07	1.58279e+07	1.40068e+07	1.2365e+07	1.0506e+07	9.47306e+06	1.00234e+07	1.0799e+07	9.92871e+06	1.25248e+07	1.46377e+07	C00517	ko00071
Wbmp002612	C14H18O8	Methyl (6-O-4-hydroxybenzoyl)-α-D-glucoside	Phenolic acids	-	34446.5	34959.4	74219.9	25440.1	11004.7	15948	274448	252592	261416	162173	193197	298141	-	-
Hmyn007168	C22H45O9P	LysoPG 16:0	Lipids	-	165696	389963	392449	310032	317040	217937	927629	602454	860520	300910	837923	971458	-	-
MWSslk118	C9H10N2O5	2,2'-Cyclouridine	Alkaloids	3736-77-4	37205.9	55775.1	30677.5	61701.5	47896.2	63614.4	126243	131103	144448	86169.1	87445.4	75469.3	-	-
pmb0883	C23H48NO7P	LysoPE 18:0	Lipids	69747-55-3	131891	166118	195427	154260	200083	143164	1.05991e+06	822847	932562	361555	1.04035e+06	832358	-	-
pmn001606	C20H38O2	Eicosenoic acid	Lipids	26764-41-0	4.52694e+07	2.21223e+07	4.73493e+07	3.5706e+07	4.45834e+07	4.33926e+07	6.44591e+07	3.46238e+07	2.85432e+07	2.43912e+07	1.50984e+07	2.08621e+07	C16526	ko01040
Zmhn001883	C14H18O9	Vanillic acid-4-O-glucoside	Phenolic acids	32142-31-7	5187.85	5364.36	6765.29	2419.69	3486.48	5539.7	1.84018e+06	1.1811e+06	1.10432e+06	519817	1.15656e+06	1.03482e+06	-	-
Lmqn008288	C18H36O3	3-Hydroxyoctadecanoic Acid	Lipids	45261-96-9	525783	450066	481468	215125	184826	682707	1.29302e+06	1.08378e+06	993553	348761	1.4413e+06	2.38695e+06	-	-
Zmhn002750	C22H22O11	4-O-(6'-O-Glucosylcaffeoyl)-4-hydroxybenzoic acid	Phenolic acids	-	2967.59	11360.4	3846.85	9	9	9	841006	854542	729036	533709	770731	618696	-	-
Zbbp008808	C15H14O4	Mansonone H	Others	13383-59-0	47892.5	53092.1	40402.5	30361.3	32737.2	23499.3	112042	128082	97375.3	105504	117422	97458.3	-	-
Lhhp120826	C12H14O2	4-hydroxy-3(3-methylbut-3-en-2-yl)benzaldehyde	Others	-	175051	164995	195925	105371	220611	117575	951676	857442	906832	549416	524266	613586	-	-
pma0149	C15H16O9	Sinapoyl malate	Phenolic acids	92344-58-6	667629	373782	245630	119331	117438	193039	62515	47391.3	51469.2	75343.8	139498	118088	C02887	ko00940,ko01110
mws0921	C9H10O2	p-Coumaryl alcohol	Phenolic acids	3690-05-9	13354.8	10770.8	15109.2	30821.1	31158.9	26953	163821	224122	251161	191301	226334	264189	C02646	ko00940,ko01100,ko01110
ML10195036	C18H37NO2	3-Dehydrosphinganine	Lipids	16105-69-4	22903.5	21474.8	41451.4	35481.6	19890.4	14597.6	31041.4	30296.2	30641.3	24657.6	27186.9	19270.6	C02934	ko00600,ko01100
HJN003	C17H22O10	1-O-Sinapoyl-β-D-glucose	Phenolic acids	-	233838	226506	220021	44954.1	62395.3	41352.5	4.76835e+06	2.49193e+06	5.0007e+06	1.04934e+06	2.25716e+06	1.76483e+06	C01175	ko00940,ko01110
mws0376	C4H4O4	Fumaric acid	Organic acids	110-17-8	1.52824e+06	1.93131e+06	1.72939e+06	3.17649e+06	3.53175e+06	2.85334e+06	685863	1.29972e+06	1.86299e+06	2.91243e+06	1.25882e+06	2.03023e+06	C00122	ko00020,ko00190,ko00220,ko00250,ko00350,ko00360,ko00620,ko00650,ko00760,ko01100,ko01110,ko01200
pme0271	C4H4O4	Maleic acid	Organic acids	110-16-7	1.52824e+06	1.93131e+06	1.72939e+06	3.17649e+06	3.53175e+06	2.85334e+06	685863	1.29972e+06	1.86299e+06	2.91243e+06	1.25882e+06	2.03023e+06	C01384	ko00350,ko00650,ko00760,ko01100
MWS1983	C12H24O11	Maltitol	Others	585-88-6	1.66848e+06	4.39881e+06	4.62585e+06	2.17556e+06	2.61963e+06	2.28107e+06	198016	683704	187815	92353.6	290933	173965	-	-
Lmbn001034	C6H12O4	2,3-Dihydroxy-3-methylpentanoic acid	Organic acids	562-43-6	7936.96	7705.76	15236.4	9330.03	22707.7	9800.91	123968	152943	110054	18619.3	19180.9	14098	C06007	ko00290,ko01100,ko01110,ko01210,ko01230
pmp000587	C24H22O14	Luteolin-7-O-(6''-malonyl)glucoside	Flavonoids	-	1.16849e+06	9.04484e+07	1.8223e+07	1.51027e+06	1.15992e+06	2.27257e+06	53797.4	110812	151833	49454.7	115137	83668.2	C10103	-
Smhp004476	C26H28O14	Isovitexin-2''-O-xyloside	Flavonoids	-	575153	1.09345e+06	1.60668e+06	1.20853e+06	1.03337e+06	1.00508e+06	26850.9	16954	15755.6	14685.5	14495.6	7814.69	-	-
mws0981	C6H5N5O2	Isoxanthopterin	Nucleotides and derivatives	529-69-1	27775.9	38999.3	30561.7	26549.4	22733.5	21405.4	93580.7	77931.9	67746.3	33962.7	58380.4	43844	C03975	-
Lmrj002793	C14H16N2O4	Cyclo(Phe-Glu)	Amino acids and derivatives	-	154265	270551	297713	90610.8	152437	147404	66304.7	61170.7	79058.2	30566.5	76483.7	90581.8	-	-
pmb2260	C23H46NO7P	LysoPC 15:1	Lipids	-	106872	221900	238619	121782	178261	158179	524927	418282	542774	214404	665248	658663	-	-
Zmxn110201	C14H20O9	2,6-Dimethoxy-4-hydroxyphenol-1-O-ß-D-glucopyranoside	Others	-	2421.85	15183.2	15410.5	9	9	9	36322.1	44900.8	50749.1	82273.2	98737.5	85068.9	-	-
pme3163	C7H15O10P	D-Sedoheptuiose 7-phosphate	Others	2646-35-7	1.4081e+06	1.35757e+06	1.58238e+06	1.72643e+06	1.19753e+06	1.65352e+06	1.752e+06	223106	1.20874e+06	409350	677426	759405	-	-
pmn001587	C18H24O12	Asperulosidic acid	Terpenoids	25368-11-0	258155	699742	429130	225470	276601	241752	301630	436130	386806	497043	387353	364954	-	-
MWS201471	C15H23N3O4	Lys-Tyr	Amino acids and derivatives	35978-98-4	2.42355e+06	2.21637e+06	2.13097e+06	2.98545e+06	2.73157e+06	2.71391e+06	108046	115385	92926.3	52758.6	87381.3	83365.3	-	-
Zbzp007397	C11H16O2	5,6,7,7a-tetrahydro-4,4,7a-trimethyl-2(4H)-benzofuranone	Others	15356-74-8	545052	850029	931985	157812	146927	322471	601645	610856	792595	307302	592967	584477	-	-
MWSmce674	C31H46O2	Phylloquinone (Vitamin K1)	Others	84-80-0	67600.9	46701.8	78256.4	60340.2	63616.4	55386.6	46796.3	99486.6	117429	57495.1	67993.5	52133.1	-	-
Lmmn003748	C20H24O6	Isolariciresinol	Lignans and Coumarins	548-29-8	10924.3	4895.18	7823.83	1383.61	3846.63	10765.1	330119	352061	621613	474799	633949	836862	-	-
HJN102	C34H30O15	3,4,5-Tricaffeoylquinic acid	Phenolic acids	86632-03-3	111847	9	127543	9	9	9	342535	347148	298914	383843	232953	189442	-	-
Lmhp008924	C27H50NO7P	LysoPC 19:3	Lipids	-	6415.63	34477.1	33798	56151.9	39687.7	36530.3	632704	448618	517863	102890	230150	227178	-	-
pme1724	C8H8O2	Benzoic acid methyl ester	Phenolic acids	93-58-3	60535	59284.6	63915.9	83188.1	71277.4	69157.8	375199	484006	449998	181130	341876	145387	C20645	-
MWSmce232	C19H12O6	Dicumarol	Lignans and Coumarins	66-76-2	77626.5	183599	110831	94053.3	55886.2	82430.4	850996	537979	806836	512626	844961	659646	C00796	-
Lmtn004929	C10H14O3	Dihydroconiferyl Alcohol	Phenolic acids	2305-13-7	8467.27	14191	29582.1	20229.3	15025.1	14794.1	1.00642e+06	809263	1.10553e+06	1.10313e+06	1.3877e+06	1.24134e+06	-	-
pmb0876	C21H44NO7P	LysoPE 16:0	Lipids	53862-35-4	1.05438e+07	2.07841e+07	2.19289e+07	1.24925e+07	1.81112e+07	1.70286e+07	2.10599e+07	2.51128e+07	2.39921e+07	9.1936e+06	1.81055e+07	2.34292e+07	-	-
pmb1574	C18H28O2	9,12-Octadecadien-6-Ynoic Acid	Lipids	61481-29-6	851944	1.24822e+06	1.36347e+06	1.5985e+06	1.66334e+06	1.65737e+06	157180	280581	131374	49803.8	37935.6	50715.9	-	-
Lmhp010514	C25H48NO7P	LysoPE 20:2(2n isomer)	Lipids	-	16784.6	32298.7	13064.7	36918.8	37928.2	35351.1	233662	237229	295172	112326	252375	243972	-	-
Lmgn000160	C4H8N2O3	3-Ureidopropionic Acid	Organic acids	462-88-4	998041	644067	640079	595213	405633	522266	1.1232e+06	976520	579690	154292	140478	116880	C02642	ko00240,ko00410,ko00770,ko01100
MWS20633g	C9H12NO6P	O-phosphate-L-tyrosine	Amino acids and derivatives	21820-51-9	389209	344944	307634	264033	290301	262943	163033	239074	133239	97370.8	118836	115645	C06501	-
pmf0175	C10H22O	2-Decanol	Others	1120-06-5	2.17764e+06	2.79396e+06	3.52456e+06	1.37419e+06	1.47077e+06	1.7159e+06	2.40803e+06	2.63648e+06	3.04383e+06	1.64994e+06	2.05433e+06	2.00099e+06	-	-
pmb0803	C24H29NO11	Pyridoxine-5'-O-(6''-feruloyl)glucoside	Others	-	5421.43	1362.41	3911.84	2095.75	6670.03	3638.45	3.12755e+06	2.57221e+06	2.39761e+06	545294	1.06974e+06	1.85488e+06	-	-
pme1474	C11H15N5O3S	5'-Deoxy-5'-(methylthio)adenosine	Nucleotides and derivatives	2457-80-9	3.02168e+06	2.89254e+06	2.41848e+06	978643	969784	1.19621e+06	1.94207e+06	1.9828e+06	2.41258e+06	1.08791e+06	2.56342e+06	3.17938e+06	C00170	ko00270,ko00908,ko01100
MWS201408	C9H14N2O7	Asp-Glu	Amino acids and derivatives	6157-06-8	499430	436971	455389	681096	814081	769354	345108	256644	294734	138763	140137	132916	-	-
mws0009	C10H10O3	Coniferaldehyde	Phenolic acids	20649-42-7	493432	344910	312372	307750	322409	370343	1.71953e+06	757944	1.6243e+06	790910	631750	631746	C02666	ko00940,ko01100,ko01110
pmp001288	C28H32O14	Acacetin-7-O-rutinoside (Linarin)	Flavonoids	480-36-4	60511.7	47263.7	36666.2	9223.22	15428	18663.5	128883	117396	100644	34978	60763.9	42177.3	-	-
Lmhp009349	C25H44NO7P	LysoPE 20:4(2n isomer)	Lipids	-	36425.9	192671	110168	92891.9	81072.2	123644	770352	482068	602288	302757	509910	768289	-	-
MWSmce184	C12H10O4	Ethyl 3-coumarincarboxylate	Lignans and Coumarins	1846-76-0	115196	188975	136782	46311.8	81455.2	37289.7	356934	437923	367138	243055	243109	314777	-	-
pmb2221	C18H39NO3	4-Hydroxysphinganine	Lipids	554-62-1	1.07558e+06	1.2743e+06	2.47908e+06	1.51599e+06	1.11725e+06	911543	1.48096e+06	1.7544e+06	1.58861e+06	1.33247e+06	1.64324e+06	1.12145e+06	C12144	ko00600,ko01100
Wbtn005631	C19H18O10	1,3,7-trihydroxy-2-[3,4,5-trihydroxy-6-(hydroxymethyl)oxan-2-yl]xanthen-9-one	Flavonoids	-	6984.91	10369.7	2651.91	2211.33	8908.11	8498.74	77888.3	88687.3	134091	97040.4	115327	124370	-	-
Zmdn011161	C15H12O3	Chrysophanol-9-anthrone	Quinones	491-58-7	539126	508663	524613	374965	429357	443598	535351	462555	582031	377619	381399	360767	C10314	-
MWS201054	C6H11NO4	O-Acetyl-L-homoserine	Amino acids and derivatives	250736-84-6	1.49784e+06	1.93979e+06	602828	909678	828482	808403	244907	278016	131658	171341	112365	10318.8	-	-
pme2563	C8H14N2O5S	γ-Glu-Cys	Amino acids and derivatives	636-58-8	587769	536842	557760	421052	569151	745291	3260.21	10622.9	7441.35	2885.34	1541.03	8065.67	C00669	ko00480,ko01100,ko01240
MWSmce466	C8H8O2	4-Hydroxyacetophenone	Phenolic acids	99-93-4	79004	36459.6	72880.8	103204	121735	108690	419480	438973	607221	985737	1.13713e+06	1.43012e+06	C10700	ko01100
mws0267	C3H6O4	DL-Glyceric Acid	Organic acids	473-81-4	437926	271690	404778	387474	315728	652135	276070	664344	501441	629192	454742	438871	C00258	ko00030,ko00260,ko00561,ko00630,ko01100,ko01110,ko01200
pmb2999	C22H22O11	Chrysoeriol-5-O-glucoside	Flavonoids	-	9833.09	1.12979e+06	16072.1	33489.7	9298.89	10349.2	323574	288417	451049	439375	328400	323856	-	-
mws1038	C11H22N2O4S	Pantetheine	Alkaloids	496-65-1	42537.7	70834.8	71924.9	82936.2	78710	96770.2	182758	146743	272011	96038.7	293299	269311	C00831	ko00770,ko01100,ko01110
mws1383	C12H10N4O2	Lumichrome	Alkaloids	1086-80-2	2.18088e+06	2.17576e+06	3.06446e+06	4.55835e+06	3.94895e+06	4.28082e+06	103204	113376	160695	82298.1	76881.4	99641.4	C01727	ko00740
pme0152	C5H8N2O2	5,6-Dihydro-5-methyluracil	Nucleotides and derivatives	696-04-8	2.32665e+06	2.22583e+06	1.89656e+06	1.89897e+06	2.01455e+06	2.01291e+06	892266	638597	966369	422883	760862	421472	C00906	-
pmd0147	C28H54NO7P	LysoPC 20:2	Lipids	-	139329	489932	356088	504344	332480	436432	3.45324e+06	2.48475e+06	3.71644e+06	1.06267e+06	2.94834e+06	5.35342e+06	-	-
pmp001245	C15H22NO4+	Feruloylcholine	Alkaloids	85927-25-9	435881	165815	242456	586016	381345	281476	110001	54183.9	97337.3	63241.9	72420.1	77968.1	-	-
pmb1650	C18H30O2	Octadeca-11E,13E,15Z-trienoic acid	Lipids	25575-00-2	3.73985e+07	6.15041e+07	3.7369e+07	5.13424e+07	3.32317e+07	2.71146e+07	5.82232e+07	6.01515e+07	5.50235e+07	3.92406e+07	2.95817e+07	4.64662e+07	-	-
pme2743	C10H11NO3	N-Phenylacetylglycine	Amino acids and derivatives	500-98-1	418860	138852	133389	33318.1	54223.4	36608.6	43940.9	150500	130627	159739	102861	36588.7	C05598	ko00360
MWSslk100	C12H11N	Diphenylamine	Alkaloids	122-39-4	28799.2	33609.2	31173.1	9726.84	19084.5	24506	34854.6	33742.8	39901.2	27297.7	37322.8	34291.1	C11016	-
Lmyn008503	C8H16O2	Octanoic acid	Lipids	124-07-2	10716.4	22222	24497	27269.4	14048.3	15491.2	108230	148485	141301	81635.3	99611.4	96876.4	C06423	ko00061,ko00785,ko01100,ko01240
HJAP104	C7H6O	Benzaldehyde	Phenolic acids	100-52-7	1.33259e+06	1.84974e+06	1.39451e+06	9	527586	267725	3.71653e+06	3.51167e+06	4.87877e+06	4.90431e+06	5.15353e+06	4.64704e+06	C00261	ko01100
pme3188	C9H13N2O9P	Uridine 5'-monophosphate	Nucleotides and derivatives	58-97-9	2.32557e+06	2.08282e+06	2.25962e+06	1.31773e+06	2.09873e+06	1.97431e+06	523320	574422	427379	276494	313577	267174	C00105	ko00240,ko01100,ko01232,ko01240
Hmmp001310	C11H9NO2	3-Indoleacrylic acid	Alkaloids	1204-06-4	2.97891e+06	2.17939e+06	1.44268e+06	801838	533555	731217	4.15361e+06	2.7934e+06	2.98565e+06	875182	1.51044e+06	1.42516e+06	C21283	-
MWSmce573	C9H10O2	3,4-Dimethylbenzoic acid	Phenolic acids	619-04-5	10098.9	13628.5	12281.8	7170.42	7590.49	7998.72	9067.54	8291.09	5831.35	7932.82	10328.3	7470.47	-	-
pme0290	C9H10O2	4-Ethylbenzoic acid	Phenolic acids	619-64-7	10098.9	13628.5	12281.8	7170.42	7590.49	7998.72	9067.54	8291.09	5831.35	7932.82	10328.3	7470.47	-	-
MWSHY0049	C16H14O6	Hesperetin	Flavonoids	520-33-2	10067.5	13482.6	9457.6	8258.33	3940.12	5770.66	308455	383327	299420	829739	1.68194e+06	1.61902e+06	C01709	ko00941
MWS0552	C15H28O2	Cis-10-Pentadecenoic Acid(C15:1)	Lipids	84743-29-3	556059	512372	523361	382482	421851	457057	529110	485892	631878	424223	383662	348507	-	-
Wbtn006721	C15H10O6	6,8-dihydroxy-3-methyl-9-oxoxanthene-1-carboxylic acid	Others	-	11679.1	30342.5	16148.2	13067.2	12865.9	12422.5	6648.27	9502.82	8842.42	189538	22250.9	41138.8	-	-
mws0972	C6H12O3	6-Hydroxyhexanoic acid	Organic acids	1191-25-9	228550	177323	271605	259723	224467	194233	133443	136699	106997	166688	179470	157075	C06103	-
MWS201458	C15H22N2O3	Phe-Ile	Amino acids and derivatives	22951-94-6	227749	166798	312459	346135	390420	359212	175683	150900	142690	74166.2	150181	245842	-	-
mws0677	C12H14N2O2	N-Acetyl-5-hydroxytryptamine	Alkaloids	1210-83-9	34620.3	48347.1	54677.4	36408.4	21891.9	39796.2	354115	316025	339404	153949	282800	358739	C00978	ko00380,ko01100,ko01110
pme2923	C4H6O4	Acetoxyacetic acid	Organic acids	13831-30-6	64951.5	47951.8	36513.9	62853.4	73678.7	68597.3	58126.9	52561.9	44043.6	52301.2	44772.2	36485.4	-	-
Lmsp004450	C20H22O6	Dehydrodiconiferyl alcohol	Lignans and Coumarins	4263-87-0	518938	437382	404557	186265	212867	204007	49069	26849.2	49432.4	49893.4	46582.3	44700.8	-	-
pmb3074	C16H18O8	5-O-p-Coumaroylquinic acid	Phenolic acids	1899-30-5	701116	2.84538e+06	581909	89354.1	85251.2	49911.1	122511	85748.6	81411.8	42284.1	70173.1	78369.3	C12208	ko00940,ko00941,ko00945,ko01110
Lmdp004892	C24H22O14	Kaempferol-3-O-(6''-malonyl)galactoside	Flavonoids	-	2.18228e+06	7.4298e+07	2.4589e+07	2.02698e+06	1.87966e+06	2.78495e+06	299514	344662	360886	281745	371574	221746	-	-
Lmmp003817	C24H22O14	Kaempferol-3-O-(6''-malonyl)glucoside	Flavonoids	-	2.18228e+06	7.4298e+07	2.4589e+07	2.02698e+06	1.87966e+06	2.78495e+06	299514	344662	360886	281745	371574	221746	-	-
MWS4396	C11H8O3	1-Hydroxy-2-Naphthoic Acid	Organic acids	86-48-6	20906.1	24099.4	20189.9	19652.5	22493.9	23458.8	19984.5	24591	31369.5	32901.8	23774.8	22733.4	C03203	ko01100
mws0221	C6H12N2O4S2	L-Cystine	Amino acids and derivatives	56-89-3	62822.5	57693.5	24002.1	44885.9	66164.5	75726.3	68132.3	70353.1	74692.9	35956.9	45142.5	53819.5	C00491	ko00270,ko01100,ko02010
pmf0512	C2H3NO3	Oxamic acid	Amino acids and derivatives	471-47-6	17107.2	25792.3	28764.4	37571.9	33048.1	19302.5	15730.3	15698	15291.8	7010.03	17630.1	23556.3	C01444	ko00230,ko01100
mws0089	C21H20O11	Kaempferol-7-O-glucoside	Flavonoids	16290-07-6	51994.5	5.65772e+06	438715	57394.2	34655	42949.4	82739	61955.9	76302.1	45780.4	101117	96301.5	-	-
pmn001583	C27H30O16	Quercetin-3-O-robinobioside	Flavonoids	52525-35-6	166373	62896.2	68014.8	76400.6	153591	122951	94653.3	176177	320276	303523	441850	138692	-	-
MWS20155	C18H16O8	Rosmarinic acid	Phenolic acids	537-15-5	68291.6	27163.3	69551.8	13761.9	10629.1	10955	1.85586e+07	1.22533e+07	2.78779e+07	1.84072e+07	3.35875e+07	2.67935e+07	C01850	ko00350,ko01100
mws1015	C15H16O9	Esculin (6,7-Dihydroxycoumarin-6-O-glucoside)	Lignans and Coumarins	531-75-9	36806.4	51782.9	37088.9	34843.2	41715.6	45334.2	197112	231441	196341	138905	136723	199787	C09264	-
MWS4401	C2H7N3	1-Methylguanidine	Alkaloids	471-29-4	119331	115098	76593.2	153107	192281	210092	56505.3	44640.4	39944.1	20848.6	31701.2	31425.7	C02294	-
MWS04455	C5H9NO3	Cis-L-3-hydroxyproline	Amino acids and derivatives	567-35-1	212949	181905	322675	285619	207915	239804	1.00305e+06	688525	596938	239054	406276	890518	-	-
HJAP064	C25H24O15	Isorhamnetin-3-O-(6''-malonyl)glucoside	Flavonoids	-	56180.5	3.04765e+06	186986	97957.3	26419.6	105417	337194	325274	452014	74356	106787	114870	-	-
mws0752	C11H22O2	Undecylic Acid	Lipids	112-37-8	4.04907e+06	4.40009e+06	4.26543e+06	3.64538e+06	2.41142e+06	2.72115e+06	2.07212e+06	2.0251e+06	1.92056e+06	1.89355e+06	1.67053e+06	1.69997e+06	C17715	-
MWS3270	C7H5NO4	Quinolinic Acid	Alkaloids	89-00-9	156228	418846	163895	105083	89605.1	99367.6	273239	254747	337139	143865	144672	187547	C03722	ko00380,ko00410,ko00760,ko01100,ko01240
Hmcp002187	C23H24O13	Limocitrin-3-O-galactoside	Flavonoids	-	36166.4	19164.8	25077.1	138512	60323.1	87155.3	2.26296e+06	3.1888e+06	2.23142e+06	1.38475e+06	2.76332e+06	1.98894e+06	-	-
Hmyn007087	C25H49O11P	LysoPI 16:0	Lipids	-	3263.97	2822.36	3126.88	3169.94	3324.58	3011.35	3163.01	3008.37	2469.17	2523.15	2959.76	3244.54	-	-
Lmqn004838	C15H8O8	3-O-Methylellagic acid	Tannins	-	3556.55	194034	12525.7	2717.24	1955.66	5551.92	159613	142805	138848	81406.8	114441	114964	-	-
pme1184	C10H13N5O4	2'-Deoxyguanosine	Nucleotides and derivatives	961-07-9	106174	506245	330628	838781	829465	798602	1.87389e+06	1.00545e+06	872455	580588	944834	983598	C00330	ko00230,ko01100,ko01232,ko02010
MWSmce203	C12H22O11	D-Cellobiose	Others	528-50-7	69277.4	144764	183978	98567.1	86169.3	105705	153260	132778	125504	43293.8	93644.8	89399.5	-	-
mws4174	C8H15NO6	N-Acetyl-D-mannosamine	Others	7772-94-3	236256	141165	361893	169181	256772	185168	110550	132215	90340.1	75485.5	83180.4	95502.2	C00645	ko00520,ko01100,ko01250
mws0874	C10H14N5O7P	3'-Adenylic Acid	Nucleotides and derivatives	84-21-9	169448	117458	129335	95807.7	133663	145456	71278.5	68962.3	50726.2	18387.4	33776.6	30939.4	C01367	ko00230,ko01100
Hmqp003184	C29H30O18	Luteolin-7-O-(6''-malonyl)glucoside-5-O-arabinoside	Flavonoids	-	27776.5	11571	17828.4	1.07846e+06	189695	105162	36017.5	39318.1	65481.5	42711.2	16552.4	14441.2	-	-
pmn001421	C16H18O8	3-O-p-Coumaroylquinic acid	Phenolic acids	87099-71-6	686105	2.70134e+06	557341	50162.5	36078.7	43904	136066	122615	83177.6	114229	56808.5	118804	-	-
pme2266	C10H16N2O3S	Biotin	Others	58-85-5	595370	1.01146e+06	590819	602297	462404	444908	670334	658345	759423	566476	880726	1.14383e+06	C00120	ko00780,ko01100,ko01240,ko02010
Lmrn002746	C6H12O3	2-Hydroxy-4-methylpentanoic acid	Organic acids	498-36-2	164730	373645	164892	119222	109522	123303	26402.6	30880.4	24036.1	17218.9	18122	14960	-	-
MWSmce713	C9H12O2	3-(4-Hydroxyphenyl)-1-propanol	Phenolic acids	10210-17-0	9	9	9	9	9	9	24433.5	32779.5	53468.2	130076	56213.3	62797.4	-	-
Lmhp009497	C25H44NO7P	LysoPE 20:4	Lipids	-	32762.5	166185	112612	96758.3	96049.6	106067	849331	529151	611475	313866	930696	618642	-	-
mws4163	C24H42O21	Nystose	Others	13133-07-8	1577.79	188720	6951.61	6040.96	170207	7041.52	3.51626e+06	4.98132e+06	1.8794e+06	1.92688e+06	1.69758e+06	1.60886e+06	-	-
mws5028	C7H5NO2	2-Benzoxazolinone	Alkaloids	59-49-4	123207	64020.4	136773	67856.1	43709.1	14526.4	518626	494158	635090	701683	781637	587689	-	-
Hmgn001653	C7H6O3	Protocatechualdehyde	Phenolic acids	139-85-5	597764	578525	290818	641129	615872	548506	4.57164e+06	2.94468e+06	2.88313e+06	2.57717e+06	3.52852e+06	3.66741e+06	C16700	ko00950
MWS201436	C10H21N3O4	Lys-Thr	Amino acids and derivatives	97791-84-9	50381.5	52684.3	60479.9	49500.8	66438.1	78846.4	48323.8	52195.7	44523.2	48746.2	47503.4	40925.6	-	-
Zmgp004297	C19H20O2	1-phenyl-7-(4-hydroxyphenyl)-4-ene-3-heptanone	Others	-	1.2313e+06	1.20979e+06	1.00829e+06	857459	743776	1.012e+06	717922	1.25208e+06	767729	717658	840379	719777	-	-
mws2218	C8H10N4O2	Caffeine	Alkaloids	58-08-2	54475.8	31941.8	44851.4	33646.6	12909.9	25862.9	31414.4	87096	54118.9	49835.3	33346.7	32339.8	C07481	ko00232,ko01100,ko01110
HJN012	C20H26O7	4,7,9,9'-Tetrahydroxy-3,3'-dimethoxy-8-O-4'-neolignan	Phenolic acids	-	37233.4	46087.3	53750.6	66968.4	58847.8	66184.3	132570	93559	272960	39338.9	60961.9	79383.5	-	-
pmb0711	C27H30O16	Quercetin-7-O-rutinoside	Flavonoids	147714-62-3	368952	80615.4	157319	87354.4	188264	113473	28366.7	16253.4	75999.7	103135	244460	31778.5	-	-
MWSHY0067	C27H30O16	Quercetin-3-O-rutinoside (Rutin)	Flavonoids	153-18-4	368952	80615.4	157319	87354.4	188264	113473	28366.7	16253.4	75999.7	103135	244460	31778.5	C05625	ko00944,ko01100,ko01110
pmb0864	C19H40NO7P	LysoPE 14:0	Lipids	-	61103	338881	323918	190408	179961	660404	1.9055e+06	1.36393e+06	2.49986e+06	420702	1.62983e+06	717085	-	-
pme1841	C5H14N2	Cadaverine	Alkaloids	462-94-2	13858.9	4337	24783.3	17574.2	11087.7	8967.23	9750.8	49407.3	4421.67	60818.9	6452.07	7718.94	C01672	ko00310,ko00470,ko00480,ko00960,ko01100,ko01110
pme3154	C6H12O4	Mevalonic acid	Organic acids	150-97-0	364291	413263	411064	544514	483417	437278	399147	415010	275009	226406	396927	477435	C00418	ko00900,ko01100,ko01110
pme1975	C3H4O4	Malonic acid	Organic acids	141-82-2	1.215e+07	1.84266e+07	1.65186e+07	1.05245e+07	1.04016e+07	1.02093e+07	3.90042e+06	4.54697e+06	2.38572e+06	4.86099e+06	3.87914e+06	3.21697e+06	C00383	ko00061,ko00240,ko00410,ko01100,ko01212
Xmyp004945	C33H40O20	Kaempferol-3-O-(6''-Rhamnosyl-2''-Glucosyl)Glucoside (Camelliaside A)	Flavonoids	135095-52-2	9972.38	7511.92	3864.05	9	6127.93	2423.41	5643.95	14373.9	2.72193e+06	23777.8	20042.9	123169	-	-
mws1565	C17H24O10	Geniposide	Terpenoids	24512-63-8	909275	810934	450457	321631	451054	562623	638218	535250	509703	148388	270881	241155	C09781	-
Zjmp102708	C30H46O5	3-Hydroxyolean-12-ene-28,29-dioic acid (Serratagenic Acid)	Terpenoids	6488-64-8	66038.1	58412.8	35637.1	92978.6	50644.6	26845.4	3.45554e+06	4.40993e+06	4.67279e+06	2.04813e+06	1.72652e+06	1.48844e+06	-	-
pme2890	C8H16N2O4S2	L-Homocystine	Amino acids and derivatives	626-72-2	50097.6	62602.9	68573.8	152408	107398	95022.9	24985.7	46262.2	29599.1	19335	28720.8	22697.1	C01817	ko00270
MWS0700	C9H11N5O4	Neopterin	Alkaloids	2009-64-5	31775.3	81118.9	31635.5	28276.5	25273.6	28823.4	86180.7	54397.9	119872	34709.4	87533.7	66804.9	C05926	ko00790
Xmyp005654	C21H20O11	Kaempferol-4'-O-glucoside	Flavonoids	-	406858	485924	365627	217548	233826	249174	418457	462042	500277	352439	430351	340662	-	-
mws1189	C6H10O7	D-Galacturonic acid	Others	685-73-4	48813.6	78365	100886	86629.9	51367.7	100942	87120.2	56096.7	85278.8	88825.3	62046.2	87377.9	C00333	ko00040,ko00053,ko00520,ko01100,ko01240,ko01250,ko02010
MWSmce001	C9H8O4	5-Acetylsalicylic acid	Phenolic acids	13110-96-8	78904.8	60904.4	81179.5	49360.6	48028.4	53535	1.58843e+06	1.57754e+06	1.63928e+06	1.2124e+06	1.62357e+06	1.94358e+06	-	-
MWStz261	C11H18N2O2	Cyclo(D-Leu-L-Pro)	Amino acids and derivatives	36238-67-2	19927	22959.1	11233.4	19268	26770	14608.2	22819.2	33287.1	36415	26344.9	33016.1	24549	-	-
mws3141	C12H14N2O3	5-Methoxy-DL-tryptophan	Amino acids and derivatives	28052-84-8	19043.9	33363.7	13686.6	19089.8	10047.2	70638.6	360757	471309	338790	116730	175307	104481	-	-
mws0982	C6H11N3	1-Methylhistamine	Alkaloids	501-75-7	135466	135545	141606	119404	112756	119109	109301	116034	112529	90491.3	104006	102305	C05127	ko00340,ko01100
Wafn001957	C15H16O11	2-O-Caffeoylglucaric Acid	Phenolic acids	-	110088	255209	215368	44020.9	46965.1	118358	110733	197401	178640	338402	709672	681552	C03062	-
pme2598	C8H8O4	3,4-Dihydroxybenzeneacetic acid	Phenolic acids	102-32-9	128106	151507	88129.3	346318	436782	461426	2.45585e+07	2.91164e+07	2.05325e+07	1.02615e+07	3.23446e+07	3.46973e+07	C01161	ko00350,ko01100
Lmhp112042	C21H38O4	1-Linoleoylglycerol	Lipids	2277-28-3	827239	604360	479645	470055	535927	440766	85873.8	87696.9	113062	30544.7	19932.4	21885.4	-	-
Lmhp008688	C25H42NO7P	LysoPE 20:5	Lipids	-	46640.7	39353.1	156319	58552.9	23235.6	219070	786442	497270	792153	117485	1.3116e+06	1.80654e+06	-	-
MWSslk140	C7H13NO3S	N-Acetyl-L-Methionine	Amino acids and derivatives	65-82-7	35652.9	62233.1	54547.1	42800.7	49733.8	41039.4	53235.3	37697.6	65801.9	34748.3	61737.2	57575.5	C02712	-
pme2006	C9H16O4	Diethyl glutarate	Organic acids	818-38-2	38552.9	59038.1	59384.4	11759.9	38435.9	39623.5	74054	78071.1	84885.8	47131.7	54168.7	32150.3	-	-
mws1509	C13H10O3	Phenyl salicylate	Phenolic acids	118-55-8	15796.4	33763.1	5230	9659.33	11521.3	9955.81	187623	269218	146472	149518	266704	316230	C14163	-
Ljmp121502	C15H20O4	Mansonone Q	Others	-	9657.55	11234.7	18271.3	14650.9	10531.9	15556	901472	96938.3	87534.3	169539	792257	53351.1	-	-
MWS1840	C6H15N	Triethylamine	Alkaloids	121-44-8	78671.7	45394.8	47194.6	59693.3	63160.5	63924.1	54540.3	67885.1	56125.7	56906.5	49765.8	58170.3	C14691	-
Lmhp008589	C23H42NO7P	LysoPE 18:3(2n isomer)	Lipids	-	1.00587e+06	2.34987e+06	1.34709e+06	1.60387e+06	1.34363e+06	1.41343e+06	2.47558e+06	2.19968e+06	3.7271e+06	1.16832e+06	3.10631e+06	2.35148e+06	-	-
mws0263	C5H7NO3	5-Oxo-L-Proline	Amino acids and derivatives	98-79-3	10538.9	11625.7	13264.9	2275.52	5399.22	10743.4	84695.1	46803.7	58619.6	6255.33	26368.5	28095.9	C01879	ko00480,ko01100
HJAP052	C10H12O4	2,4,5-Trimethoxybenzaldehyde	Phenolic acids	4460-86-0	38471	36155.2	30782.6	19996.7	18018	30330.8	22249.8	23832.2	36500.4	17057.3	15261.8	24012	-	-
pme1292	C8H8O4	Homogentisic acid	Phenolic acids	451-13-8	220425	44843.9	95661.9	211231	302028	247167	1.6966e+07	20179258	1.44298e+07	7.2494e+06	2.29705e+07	2.41765e+07	C00544	ko00130,ko00350,ko01100,ko01240
Lmhp007595	C24H42NO7P	LysoPC 16:4	Lipids	-	3982.08	22863.7	12399.5	6111.11	12634.7	13033.5	77386.1	33364.4	60065.4	20277.4	49619.9	43784.3	-	-
pmn001338	C21H18O11	Rhein-8-O-glucoside	Quinones	34298-86-7	2.07424e+06	5.227e+06	5.59301e+06	5.67733e+06	4.39157e+06	4.32062e+06	601265	565451	863601	1.10089e+06	1.86358e+06	1.51224e+06	-	-
MWSmce139	C15H8O5	Coumestrol	Lignans and Coumarins	479-13-0	7605.39	10522.7	8764.79	4751.68	7283.56	12548.9	296968	345160	293163	506466	554749	698015	C10205	ko01110
mws0987	C10H8O2	6-MethylCoumarin	Lignans and Coumarins	92-48-8	133172	158713	65951.6	81798.8	105059	93438.5	8.78209e+06	5.87488e+06	8.71731e+06	5.88505e+06	5.07872e+06	7.33017e+06	-	-
Wmzn000227	C6H10O4	2,2-Dimethylsuccinic acid	Organic acids	597-43-3	15280.3	30836.7	29739.3	48591.9	73062.5	40733.3	416393	445434	210478	39139.6	55522.4	66350.3	-	-
Zblp001009	C12H17NO6	3-pyridine-methanol-O-β-D-glucopyranosyl	Alkaloids	-	341456	413389	381850	325080	111647	157944	864702	671080	667988	682684	1.13098e+06	938225	-	-
pme2651	C21H28N7O17P3	NADP (Nicotinamide adenine dinucleotide phosphate)	Nucleotides and derivatives	53-59-8	115710	101656	210580	92363.7	139696	89019.8	15116.1	11166.7	10914.5	14103.6	7912.67	11422.6	C00006	ko00195,ko00480,ko00760,ko01100,ko01240
pme0534	C6H12O7	Gluconic acid	Others	526-95-4	4.62589e+06	5.90732e+06	3.96547e+06	3.28345e+06	3.39377e+06	3.43934e+06	3.96705e+06	2.86517e+06	2.02048e+06	1.00334e+06	1.75644e+06	1.8598e+06	C00257	ko00030,ko01100,ko01110,ko01200
MWStz054	C9H13NO	2,4,6,6-Tetramethyl-3(6H)-pyridinone	Alkaloids	203524-64-5	55797	44526.6	26699.7	53055.3	37321.9	58739.1	47134.8	47189.2	58900.3	107024	117003	131192	-	-
MWS201399	C9H17N3O4S	Met-Asn	Amino acids and derivatives	36261-61-7	18468.6	18860.8	15703.9	28255.9	25353.6	26701.4	10285.2	3957.26	15499.9	6048.74	8181.87	12476	-	-
Hmln000297	C6H12O6	Inositol	Others	87-89-8	957629	1.75114e+06	1.22581e+06	1.29254e+06	806706	1.09736e+06	4.18826e+06	2.49013e+06	2.36928e+06	709920	2.72157e+06	1.55527e+06	C00137	ko00052,ko00053,ko00562,ko01100,ko01110,ko01250,ko02010,ko04070
Wmhp000012	C17H26O10	Ajugoside	Terpenoids	52916-96-8	14676.5	19277.1	26884.5	9	9	9	165581	161182	181747	167932	152313	144767	-	-
MWS1792	C4H11N	Butylamine	Alkaloids	109-73-9	96319.4	114545	73733.6	155514	165033	184893	45992	43820.8	42691	21866.8	32141.3	26041.2	-	-
Lmtn003096	C26H36O11	Secoisolariciresinol 4-O-glucoside	Lignans and Coumarins	-	236151	55102.3	233686	33049.8	18710.4	69338.7	1.07834e+06	1.12084e+06	1.27495e+06	1.96351e+06	2.36447e+06	2.04843e+06	-	-
Hmcp002207	C22H22O12	Isorhamnetin-7-O-glucoside (Brassicin)	Flavonoids	6743-96-0	39384	162119	30027	14973.1	13593	16035.5	358464	372866	393557	293996	510251	409000	-	-
Lmjp003044	C22H22O12	Isorhamnetin-3-O-Glucoside	Flavonoids	5041-82-7	39384	162119	30027	14973.1	13593	16035.5	358464	372866	393557	293996	510251	409000	-	-
MWS201381	C14H17N3O4	Ser-Trp	Amino acids and derivatives	94421-70-2	377722	352687	431325	547610	458760	503235	162723	204099	253240	86260	162698	236054	-	-
Latp011219	C10H12O	3,5-Dimethyl-2,3-dihydrobenzofuran	Others	-	1.08698e+07	8.19004e+06	1.12471e+07	7.37289e+06	8.18693e+06	8.16157e+06	1.16723e+07	1.23964e+07	1.27379e+07	8.36051e+06	8.525e+06	5.43281e+06	-	-
Lmsn015919	C6H18O24P6	Phytic acid	Organic acids	83-86-3	238244	216632	203714	202299	191176	187483	307474	335927	439305	405010	546517	578955	C01204	ko00562,ko01100,ko04070
MWSmce591	C15H22O2	Curcumenol	Terpenoids	19431-84-6	417752	835129	630846	199401	109865	247140	461288	553693	515508	367676	321461	411208	C16942	-
MWSmce668	C10H16N5O13P3	ATP; Adenosine 5'-Triphosphate	Nucleotides and derivatives	56-65-5	39387.9	88834.4	99950	76756.6	99465.5	93766.7	14840.7	7106.18	8093.79	4105.05	7502.38	7284.61	C00002	ko00190,ko00195,ko00230,ko00908,ko01100,ko01110,ko01232,ko01240
pme2755	C8H15NO6	N-Acetyl-D-glucosamine	Others	7512-17-6	509334	340564	766225	440559	479293	378503	188154	271253	173236	151314	180401	145036	C00140	ko00520,ko01100,ko01250,ko02010
mws2108	C16H18O9	Cryptochlorogenic acid (4-O-Caffeoylquinic acid)	Phenolic acids	905-99-7	96188.5	317708	288728	217219	59695.1	69123.7	225661	571900	171153	272515	449862	635077	-	-
pmb0881	C23H44NO7P	LysoPE 18:2	Lipids	-	624650	1.43233e+06	1.06554e+06	746068	712489	1.033e+06	9.86303e+06	6.40453e+06	6.35238e+06	3.4246e+06	7.6242e+06	5.3053e+06	-	-
Lmxp011770	C16H22O4	Diisobutyl phthalate	Phenolic acids	84-69-5	3.96618e+07	2.02974e+07	3.95707e+07	4.34451e+07	2.38727e+07	3.81063e+07	4.11954e+07	4.76422e+07	2.97979e+07	2.98708e+07	3.38618e+07	2.5531e+07	C15205	-
pmb2673	C9H9NO5	6-Hydroxydopaquinone	Amino acids and derivatives	135791-48-9	23816.8	18036.6	11013.2	6604.12	7107.4	8390.46	14845.4	8845.63	11184.4	14196	6767.63	6548.48	-	-
Cmsp003083	C26H32O11	Dehydrodiconiferyl alcohol-4-O-glucoside	Lignans and Coumarins	107870-88-2	954581	332862	375619	97689.6	54914	80281.9	568620	1.11305e+06	696965	937465	1.11935e+06	1.45384e+06	-	-
MWSmce613	C14H26N4O11P2	Citicoline	Nucleotides and derivatives	987-78-0	70916.2	76462.2	37241.3	48533.5	103769	101037	35106.5	44065.5	43118.3	27774.2	43677.2	49051.4	C00307	ko00564,ko01100
pme2559	C6H9NO5	N-Acetyl-L-Aspartic Acid	Amino acids and derivatives	997-55-7	387948	126725	449748	39398.2	58537.5	54064	67844.7	71593.7	59122.1	28961.6	48113.6	58517.9	C01042	ko00250,ko01100
mws1012	C9H6O2	Coumarin	Lignans and Coumarins	91-64-5	65023.3	83410.5	63604.7	52751.5	53834.7	65492.5	76599.1	56381.2	101418	40260.2	65186.5	47231	C05851	ko00999,ko01110
Hmqp005411	C18H32O3	9-Oxo-12Z-Octadecenoic acid	Lipids	112543-32-5	27274.6	37773	48400.8	36545.8	31981	56498	140239	149392	41314.2	49435.9	42398.5	41948	-	-
Hmqp005455	C18H32O3	15(R)-Hydroxylinoleic Acid	Lipids	177931-23-6	27274.6	37773	48400.8	36545.8	31981	56498	140239	149392	41314.2	49435.9	42398.5	41948	-	-
Ymjm000116	C14H18O8	6-O-Acetylarbutin	Phenolic acids	10338-88-2	46507.7	56876.9	100908	89301.3	31097.6	181077	870339	680180	534568	1.24435e+06	1.55302e+06	2.58209e+06	-	-
MWSmce700	C6H8N2	2-Ethylpyrazine	Alkaloids	13925-00-3	80956.5	16775.3	51329.1	34577.7	48365.3	46231.9	98598.5	65565.4	72384.8	9	9	9	-	-
mws2104	C7H14O6	D-Pinitol	Others	10284-63-6	374465	431311	242461	386219	334310	253231	513148	298961	457788	255729	536966	547587	C03844	-
pmb0786	C6H13NO5	D-Glucosamine	Others	3416-24-8	169729	132064	211018	145530	244035	182373	129707	168639	251157	286807	209131	192039	C00329	ko00520,ko01100,ko01250
MWSslk066	C8H8O4	3-Hydroxy-4-methoxybenzoic acid; Isovanillic Acid	Phenolic acids	645-08-9	73633.3	58289.1	43406.2	44499.9	59526.5	61510.1	627409	290396	304191	355550	248109	158466	-	-
mws0889	C4H8O5	D-Threonic Acid	Others	3909-12-4	98070.9	268059	169310	343527	274835	137960	251170	143125	237874	71010.5	149280	224101	C21649	-
Lchp000221	C11H10O4	(Z)-3-Ethylidene-7-hydroxy-6-methoxyphthalide	Others	-	270077	85633.5	121271	87927.5	145756	168901	2.68471e+07	2.0516e+07	2.71733e+07	1.07287e+07	1.27475e+07	1.20057e+07	-	-
MWS0827	C8H7NO2	Dioxindole	Alkaloids	3131-52-0	9	9	9	9	9	9	115880	94328.1	84177.5	23765.8	110058	125689	-	-
pmb2228	C27H56NO7P	LysoPC 19:0	Lipids	108273-88-7	128163	141357	162299	232616	169536	229555	253948	178453	197546	112934	178412	185774	-	-
Ljmp121501	C16H22O4	Mansonone N	Others	-	1.9653e+06	2.55269e+06	1.63327e+06	2.39173e+06	1.50272e+06	1.44201e+06	1.65013e+06	1.4286e+06	2.59365e+06	1.15441e+06	1.73973e+06	2.56749e+06	-	-
MWSslk154	C12H20O7	Triethyl citrate	Organic acids	77-93-0	187746	184307	105948	65208.6	45951.6	102127	90077.5	121011	144127	100745	66734.9	99060.5	-	-
pmb0296	C21H40O4	1-Oleoyl-Sn-Glycerol	Lipids	129784-87-8	149772	204404	422559	264353	252281	148575	328212	340544	300454	368239	582889	730528	-	-
Rfmb26201	C30H38O14	Syringaresinol-4'-O-(6''-acetyl)glucoside	Lignans and Coumarins	-	1.08724e+07	2.18506e+06	1.35593e+06	1.21236e+06	3.30218e+06	1.62716e+06	6.32339e+06	1.93142e+06	3.51398e+06	1.7103e+06	326139	314118	-	-
pme3705	C6H10O7	D-Glucoronic acid	Others	6556-12-3	219504	165741	188041	74405.5	65872.1	58355.4	281581	281162	243446	163050	215538	267037	C00191	ko00040,ko00053,ko00520,ko00562,ko01100,ko01240,ko01250
Lmhp009769	C22H44NO7P	LysoPE 17:1	Lipids	-	141071	464935	315029	197550	294028	294613	3.35653e+06	3.16425e+06	4.93558e+06	851493	2.91107e+06	5.95875e+06	-	-
Lmsp003655	C26H32O11	Dehydrodiconiferyl alcohol-gamma'-O-glucoside	Phenolic acids	-	813146	428572	377635	30556.1	60092.6	51429.5	951987	767730	376226	754541	1.32317e+06	1.47993e+06	-	-
Lmhp008885	C20H42NO7P	LysoPE 15:0(2n isomer)	Lipids	-	343497	1.81918e+06	2.02039e+06	945868	1.01796e+06	2.31537e+06	4.68294e+06	3.17022e+06	5.53511e+06	892726	1.91126e+06	667263	-	-
Rfmb25702	C28H34O12	Pinoresinol-4-O-(6''-acetyl)glucoside	Lignans and Coumarins	-	133293	99539	112054	32569.3	41592.2	61961.2	190631	103844	105335	78497.5	134524	58308.9	-	-
MWS1872	C14H8O3	1-Hydroxyanthraquinone	Quinones	129-43-1	63663.6	87915.7	79212.5	37566.4	45966.2	58412.6	72311	61483	82229.8	80081.3	83663.8	62722.9	C02980	-
Zmhn001446	C28H36O13	Syringaresinol-4'-O-glucoside	Lignans and Coumarins	7374-79-0	659835	539941	294515	176603	91707.1	176881	1.18782e+06	3.97511e+06	2.60671e+06	1.41796e+06	520346	475786	C10890	-
Lmhp010162	C22H46NO7P	LysoPE 17:0	Lipids	-	43341.3	149725	127847	40796.3	123656	95979.6	730979	344863	326153	121532	73370.2	83983.6	-	-
MWS4301	C8H8O3	3-hydroxyphenylacetic acid	Phenolic acids	621-37-4	12570.5	11165.7	10100	11819.2	19609.3	2015.07	241756	181741	277147	156063	274457	194588	C05593	ko00350,ko00360,ko01100
pme0241	C7H6O2	Benzoic acid	Phenolic acids	65-85-0	51067.8	64456.9	47451.6	46346	60655.5	48657.3	244917	197961	134011	363513	262199	218409	C00180	ko01100,ko01110
pma0702	C29H39N3O8	N1,N8-Bis(sinapoyl)spermidine	Alkaloids	-	20507.3	12197.8	26978.3	4618.1	4717.72	5551.23	175006	144487	162029	82354.9	108751	144438	C21170	-
mws2209	C21H20O11	Kaempferol-3-O-glucoside (Astragalin)	Flavonoids	480-10-4	581865	390555	418736	208526	187221	204381	343479	420172	496860	451434	438069	317259	C12249	ko00944,ko01110
pme2914	C6H10O5	3-Hydroxy-3-methylpentane-1,5-dioic acid	Amino acids and derivatives	503-49-1	4.35771e+06	2.49852e+06	2.16724e+07	3.46001e+06	2.12029e+06	1.55818e+06	4.89973e+06	3.25105e+06	2.06812e+06	716424	2.28918e+06	4.78662e+06	C03761	-
Lmmp002080	C11H16N2O	N-(4-Aminobutyl)benzamide	Alkaloids	5692-23-9	3.99423e+06	697954	1.06335e+06	1.6091e+06	2.03415e+06	1.52909e+06	726409	657952	708025	441218	366215	279316	-	-
Hmhn003067	C15H18O8	Phenylpropionic acid-O-β-D-glucopyranoside	Phenolic acids	-	33124.2	13603.4	12474	24734.8	5053.16	26536.4	808072	1.45236e+06	445367	616096	586344	324878	-	-
pme1816	C16H18O9	Neochlorogenic acid (5-O-Caffeoylquinic acid)	Phenolic acids	906-33-2	204634	496050	291686	116318	103979	209297	460895	589212	363271	475429	749374	1.05008e+06	C17147	-
Qagp003587	C13H18N2O	N-Monocinnamoylputrescine	Alkaloids	-	3.17481e+06	2.27034e+06	520946	1.96778e+06	936908	611086	1.74841e+06	1.83061e+06	1.32644e+06	1.12563e+06	756436	362000	-	-
Hmpp003270	C21H20O11	Luteolin-4'-O-glucoside	Flavonoids	6920-38-3	217615	7.19667e+06	1.34096e+06	99026.1	105154	100981	74384.3	70582.5	94384.9	35149.1	77658.8	65178.9	-	-
CAS: Chemical Abstracts Service. TH: T. chinense. THC: T. chinense chimera. PC: P. vulgaris chimera. P: P. vulgaris.

## Sheet: Table S2
Table S2: The differentially accumulated metabolites (DAMs) in the T. chinense and T. chinense chimera.
Index	Formula	Compounds	Category	CAS	TH1	TH2	TH3	THC1	THC2	THC3	VIP	log2FoldChange	Type
Lmtn003441	C15H20O7	2-Acetyl-3-hydroxyphenyl-1-O-glucoside	Phenolic acids	-	13079.2	8139.31	5758.34	1853.56	3022.42	6584.75	1.10755	-1.23502	down
MWS80006	C18H32O4	9-Hydroperoxy-9Z,11E-Octadecadienoic Acid	Lipids	-	1.59159e+06	2.80897e+06	2.3114e+06	6.58745e+06	5.66752e+06	7.89917e+06	1.41903	1.58627	up
Hmln000659	C13H16O10	3-O-Galloyl-D-glucose	Phenolic acids	-	193137	735038	775772	39938.3	43307.9	46903.8	1.42914	-3.71063	down
Zmdp001663	C10H18N2O5S	γ-glutamylmethionine	Amino acids and derivatives	17663-87-5	1.00504e+06	5.08122e+06	2.14404e+06	360768	498487	1.02712e+06	1.19378	-2.12532	down
pme2693	C6H14N2O	N-Acetylputrescine	Alkaloids	18233-70-0	1.536e+07	4.67369e+07	1.9229e+07	5.90933e+06	5.7946e+06	1.79732e+07	1.1146	-1.45436	down
mws1377	C10H8N2	2,3'-Bipyridine	Alkaloids	581-50-0	121813	122968	124712	38662.5	55542.6	87699	1.29718	-1.02237	down
Zbdn001947	C13H18O8	Isotachioside	Phenolic acids	31427-08-4	329265	702498	1.08205e+06	56479	69886.6	91196.9	1.44421	-3.28035	down
Zmpn000199	C6H10O8	D-Galactaric acid	Others	526-99-8	3.01745e+06	4.35509e+06	2.36104e+06	1.61558e+06	1.65286e+06	1.4674e+06	1.345	-1.03935	down
pmb0818	C11H11NO3	Methoxyindoleacetic acid	Alkaloids	3471-31-6	6.42897e+06	4.55816e+06	3.4273e+06	2.04053e+06	1.59237e+06	1.80649e+06	1.39796	-1.406	down
Li512111	C24H24O13	Isorhamnetin-3-O-(6''-acetylglucoside)	Flavonoids	-	132611	1.12042e+06	261649	69190.9	65570.3	69255.2	1.21245	-2.89225	down
MWS2442	C6H13O9P	D-Fructose 6-Phosphate	Others	643-13-0	2.47785e+06	3.83158e+06	3.02383e+06	9.41672e+06	8.98164e+06	9.53781e+06	1.47066	1.58168	up
Cmpp007319	C15H16O4	7-Methoxy-5-Prenyloxycoumarin	Lignans and Coumarins	35590-41-1	55600.2	17429	29730.5	6311.03	16941.1	16778	1.04493	-1.36012	down
Hmhn007023	C30H48O6	2,3,19-Trihydroxyurs-12-en-28-oic acid	Terpenoids	-	10899.4	12158.1	43526.8	44285.1	84863.3	64467.3	1.19986	1.53994	up
Jmwn002117	C14H20O9	2-(3,4-dihydroxyphenyl)ethanediol 1-O-β-D-glucopyranoside	Phenolic acids	-	409611	610412	354212	97255.6	129444	125757	1.46398	-1.96311	down
mws0250	C9H11NO3	L-Tyrosine	Amino acids and derivatives	60-18-4	1.24423e+07	7.08694e+06	7.21052e+06	3.89781e+06	3.00589e+06	4.31266e+06	1.3505	-1.25339	down
pmb0501	C5H14N4	Agmatine	Alkaloids	306-60-5	1.51236e+07	4.86168e+07	2.11933e+07	6.18427e+06	5.29168e+06	1.7666e+07	1.13767	-1.54324	down
Lmsn010896	C30H46O6	23-Formyl-2,3,19-trihydroxyurs-12-en-28-oic acid (Pinfaensic acid)	Terpenoids	-	2744.32	1666.82	3171.28	4581.62	8884.7	18348.8	1.25361	2.06898	up
pme2596	C8H9NO4	4-Pyridoxic acid	Others	82-82-6	176701	316810	155244	114239	81864.4	85657	1.30664	-1.20321	down
pmn001368	C32H44O17	Olivil-4,4'-Di-O-glucoside	Lignans and Coumarins	-	90882.2	109554	90529.3	41723.5	45169.8	38965.6	1.49195	-1.20904	down
Lmmn001643	C9H8O3	2-Hydroxycinnamic acid	Phenolic acids	583-17-5	998011	442319	1.55716e+06	2.08875e+06	2.43596e+06	2.12812e+06	1.19158	1.15021	up
Lmbn002648	C9H8O3	α-Hydroxycinnamic Acid	Phenolic acids	5801-57-0	998011	442319	1.55716e+06	2.08875e+06	2.43596e+06	2.12812e+06	1.19158	1.15021	up
Wmyn000217	C14H20O9	2,6-dimethoxy-hydroquinone-4-O-β-D-glucopyranoside	Phenolic acids	-	260685	1.08042e+06	862259	40211.5	105015	34696.2	1.3812	-3.61426	down
Lmgn002184	C7H10O5	2-Oxoheptanedionic acid	Organic acids	17126-90-8	170041	542643	30971	7608.07	19979.6	17693.4	1.20709	-4.03765	down
mws0236	C2H7NO3S	2-Aminoethanesulfonic acid	Organic acids	107-35-7	49352.6	84569.3	65019.9	28726.3	29822.9	28296.7	1.42406	-1.19582	down
Jmwn002172	C14H20O8	3,4-dihydroxyphenylethanol-β-D-glucopyranoside	Phenolic acids	-	126600	601343	218312	42234.7	70529	49534	1.30371	-2.54359	down
Lmjn005433	C19H18O8	Rosmarinic acid methyl ester	Phenolic acids	99353-00-1	2134.09	9	23923.9	9	9	9	1.03579	-9.91505	down
MWSslk132	C16H30O4	Hexadecanedioic acid	Lipids	505-54-4	6.50811e+06	8.1213e+06	7.03096e+06	2.54404e+07	2.48535e+07	3.11269e+07	1.49486	1.91034	up
MWS1830	C9H10O3	Ethylsalicylate	Phenolic acids	118-61-6	9	9	9	23310	53013.9	29869.9	1.5164	11.9415	up
pme0274	C6H13NO2	6-Aminocaproic acid	Organic acids	60-32-2	860222	631817	614236	252482	195726	275413	1.46295	-1.54139	down
MWS20672	C17H23N3O6	Glu-Phe-Ala	Amino acids and derivatives	-	194886	340706	1.2138e+06	1.4837e+06	1.06678e+06	1.09447e+06	1.01811	1.05904	up
pme0066	C3H7N3O2	Guanidinoacetate	Alkaloids	352-97-6	68143.8	123106	84119.5	30890.3	39127.7	43740.4	1.38672	-1.2754	down
MWSslk011	C11H8O3	2-Methoxy-1,4-naphthoquinone	Quinones	2348-82-5	82601	73246.4	24930.1	23422.2	14226.7	22112.5	1.17686	-1.59693	down
pme3083	C8H7NO3	2-(Formylamino)benzoic acid	Phenolic acids	3342-77-6	157498	73201.9	265075	347643	334289	329017	1.1427	1.02795	up
mws1587	C6H13NO2	L-Norleucine	Amino acids and derivatives	327-57-1	2.77651e+06	1.85411e+06	1.80607e+06	1.01011e+06	695519	790271	1.41601	-1.36676	down
pme2244	C11H11NO2	3-Indolepropionic acid	Alkaloids	830-96-6	790405	571134	358912	201265	170077	193659	1.38381	-1.60646	down
pmb0801	C14H19NO9	4-Pyridoxic acid-O-glucoside	Others	-	68219.2	357594	82787.7	49172.6	47289.4	20991.4	1.10405	-2.11444	down
MWS4525	C6H7N5O	6-O-methylguanine	Nucleotides and derivatives	20535-83-5	3.611e+06	3.0753e+06	1.79961e+06	1.24397e+06	812890	775146	1.36458	-1.58325	down
Hmpp002612	C27H30O16	Luteolin-7-O-gentiobioside	Flavonoids	-	677870	786337	800936	335378	308732	383176	1.49519	-1.14077	down
Lmqp000427	C6H11NO3	N-Methyl-Trans-4-Hydroxy-L-Proline	Amino acids and derivatives	4252-82-8	830035	1.54349e+06	800160	648424	210410	197025	1.237	-1.58774	down
MWS04555g	C6H13NO2	D-Allo-Isoleucine	Amino acids and derivatives	1509-35-9	2.56032e+06	3.18979e+06	1.73977e+06	964467	680162	942009	1.41671	-1.53386	down
MWS04559g	C9H11NO3	3-Hydroxy-L-phenylalanine	Amino acids and derivatives	587-33-7	1.11422e+07	6.42585e+06	6.52006e+06	3.66118e+06	2.92447e+06	4.181e+06	1.33467	-1.16175	down
mws0193	C7H15N3O3	L-Homocitrulline	Amino acids and derivatives	1190-49-4	160376	206453	309915	9	9	9	1.51666	-14.6134	down
Lmfn000604	C13H16O10	6-O-Galloyl-β-D-glucose	Phenolic acids	13186-19-1	177293	713849	778424	44529.7	12254.7	51388.8	1.38593	-3.94806	down
pmn001710	C24H26O13	Rosmarinic acid-3'-O-glucoside	Phenolic acids	910028-78-3	308082	108034	294560	142896	87820.9	44425.2	1.04875	-1.36901	down
pme2589	C6H8O5	2-Oxoadipic acid	Organic acids	3184-35-8	177821	194287	227607	71055.2	38719.3	52830.1	1.468	-1.88291	down
MWS5164	C8H18N4O2	N,N'-Dimethylarginine;SDMA	Amino acids and derivatives	30344-00-4	1.31737e+06	1.01458e+06	1.19531e+06	4.67335e+06	4.67808e+06	5.44534e+06	1.50596	2.06866	up
Zmjp000182	C7H16N4O2	N-Monomethyl-L-arginine	Amino acids and derivatives	17035-90-4	747034	494677	542420	1.77213e+06	1.17981e+06	1.58281e+06	1.42126	1.3458	up
MWS0618	C9H19NO4	Pantothenol	Others	16485-10-2	12049.2	16424.4	7343.68	5159.78	4617.4	6657.32	1.2547	-1.12393	down
Lmqn005404	C20H20O12	4-Hydroxybenzoyl-1-O-(6''-O-galloyl)glucoside	Phenolic acids	-	5595.92	9	7555.76	40541.3	67259	53258.6	1.07564	3.61328	up
MWSmce549	C17H34O4	1-Monomyristin	Lipids	589-68-4	8547.12	6436.87	6219.18	48385.3	7071.96	57770.8	1.04483	2.41688	up
MWStz070	C9H11NO3	N-(2-Hydroxy-4-methoxyphenyl)acetamide	Alkaloids	58469-06-0	1.74866e+07	1.09145e+07	9.47466e+06	5.59083e+06	4.51506e+06	6.40285e+06	1.34088	-1.19805	down
mws0853	C11H14O4	Sinapyl alcohol	Phenolic acids	537-33-7	2.866e+06	2.1424e+06	1.99812e+06	443122	629156	602281	1.47579	-2.06492	down
mws1200	C10H10O3	p-Coumaric acid methyl ester	Phenolic acids	19367-38-5	142927	103230	34905.3	23237	22964.6	25274.6	1.234	-1.97536	down
Lmxp001668	C9H10O2	2-Methoxy-4-ethenylphenol	Phenolic acids	7786-61-0	1.76514e+06	3.14875e+06	1.3982e+06	407605	431478	126406	1.36069	-2.70879	down
mws1014	C10H8O5	Fraxetin (7,8-Dihydroxy-6-methoxycoumarin)	Lignans and Coumarins	574-84-5	3.32813e+06	1.58492e+06	1.65589e+06	562229	733761	714318	1.36904	-1.70824	down
Zmzn000078	C3H7O6P	Dihydroxyacetone phosphate	Others	57-04-5	82782.6	123402	98513.4	207658	332459	310704	1.4218	1.48147	up
pme2292	C4H12N2	Putrescine	Alkaloids	110-60-1	2.73914e+06	2.64367e+06	1.6105e+06	587569	1.09443e+06	1.43688e+06	1.21433	-1.16495	down
pme0033	C5H4N4O	Hypoxanthine	Nucleotides and derivatives	68-94-0	257340	607999	344471	1.40725e+06	782963	578132	1.12613	1.19425	up
pmn001423	C19H30O8	Roseoside	Others	54835-70-0	317045	306404	173082	41450.6	50430	65780.2	1.45478	-2.33691	down
MWSmce709	C9H7N	Isoquinoline	Alkaloids	119-65-3	3.10443e+06	2.3116e+06	1.86318e+06	1.04896e+06	713442	938315	1.41837	-1.43044	down
Zbdn002066	C13H18O8	Tachioside	Phenolic acids	109194-60-7	175711	741823	1.01431e+06	66507.6	57294.8	71790.3	1.35713	-3.30406	down
mws5041	C8H16N2O3	L-Glycyl-L-isoleucine	Amino acids and derivatives	19461-38-2	426698	372357	629662	940045	1.08022e+06	1.0015e+06	1.4017	1.08067	up
Lmrj002087	C10H18N2O5	L-Isoleucyl-L-Aspartate	Amino acids and derivatives	-	2.28659e+06	1.94558e+06	2.62352e+06	8.89541e+06	9.65685e+06	7.57174e+06	1.50155	1.93	up
mws1382	C9H10O3	4'-Hydroxy-3'-methoxyacetophenone (Acetovanillone)	Phenolic acids	498-02-2	3375.92	3874.18	7225.37	9	9	9	1.51371	-9.06644	down
Hmcp005697	C30H48O	Olean-13(18)-en-3-one (δ-Amyrenone)	Terpenoids	20248-08-2	46913.2	91326.3	145630	15979.7	16193.4	25681.9	1.38213	-2.29472	down
Zmgn001448	C7H12O5	2-Propylmalic Acid	Organic acids	-	316340	564973	612852	1.11981e+06	869770	1.05162e+06	1.28356	1.02531	up
Lmbn001754	C7H12O5	3-Isopropylmalic Acid	Organic acids	921-28-8	316340	564973	612852	1.11981e+06	869770	1.05162e+06	1.28356	1.02531	up
pme0137	C7H12N2O4	N-Acetyl-L-Glutamine	Amino acids and derivatives	2490-97-3	978879	1.08688e+06	1.03736e+06	331010	485285	438125	1.46636	-1.3067	down
pme2836	C10H11NO2	5-Hydroxytryptophol	Alkaloids	154-02-9	58767.7	150258	124951	44929.4	41984.5	24788	1.27776	-1.5801	down
MWS00204g	C4H9NO2	N-Ethylglycine	Amino acids and derivatives	627-01-0	1.66328e+07	1.86842e+07	2.14911e+07	9	9	9	1.51718	-21.0047	down
MWSmce577	C12H14O3	(E)-Ethyl p-methoxycinnamate	Phenolic acids	24393-56-4	253827	365656	426539	122031	103320	157463	1.42762	-1.4502	down
Lmsn003628	C23H32O15	6'-O-Sinapoylsucrose	Phenolic acids	-	187648	167213	151405	62974.2	79839.7	101215	1.40711	-1.05284	down
Lmsn001014	C13H16O10	1-O-Galloyl-β-D-glucose	Phenolic acids	58511-73-2	210854	727213	762942	15905.3	36616.6	16195.2	1.44614	-4.62958	down
mws0027	C9H10O5	Syringic acid	Phenolic acids	530-57-4	142605	126848	123584	57561.3	64510.7	57531	1.49361	-1.12985	down
MWS80007	C18H32O4	13-Hydroperoxy-9Z,11E-octadecadienoic acid	Lipids	23017-93-8	3.84648e+06	7.2645e+06	6.14832e+06	1.70113e+07	1.50668e+07	1.92923e+07	1.41103	1.57356	up
pme1194	C9H13N3O4	2'-Deoxycytidine	Nucleotides and derivatives	951-77-9	71380.4	81567.7	90535.3	139287	153906	241749	1.35378	1.13556	up
Lmtn002596	C26H34O11	Dihydrodehydrodiconiferyl alcohol-4-O-glucoside	Lignans and Coumarins	-	476454	147393	143825	111891	105686	93200.4	1.00638	-1.30461	down
Zaln004057	C16H16O8	4-caffeoylshikimic acid	Phenolic acids	-	137268	564326	191810	121952	42911.3	50074.1	1.20554	-2.05539	down
pme3961	C10H13N5O3	2'-Deoxyadenosine	Nucleotides and derivatives	958-09-8	798549	1.21856e+06	1.20985e+06	2.75903e+06	4.02137e+06	3.02653e+06	1.44344	1.60363	up
Lchp000218	C11H12O4	(R)-3-ethyl-7-hydroxy-6-methoxyphthalide	Others	-	3.08672e+06	2.84001e+06	2.38828e+06	960859	901981	1.13247e+06	1.49012	-1.47301	down
mws0254	C6H9N3O2	L-Histidine	Amino acids and derivatives	71-00-1	1.23828e+07	1.74601e+07	1.11182e+07	5.88955e+06	4.28043e+06	6.65271e+06	1.41161	-1.28384	down
mws2118	C21H24O10	Phloretin-2'-O-glucoside (Phlorizin)	Flavonoids	60-81-1	20398.5	31079.6	22666.3	9	9	9	1.51717	-11.4232	down
mws0629	C13H16N2O5	L-Aspartyl-L-Phenylalanine	Amino acids and derivatives	13433-09-5	543773	759956	2.06063e+06	6.23659e+06	5.58638e+06	4.27365e+06	1.36247	2.25836	up
pme1228	C11H12N2O3	5-Hydroxy-L-tryptophan	Amino acids and derivatives	56-69-9	144287	371541	199939	114771	78811.8	85286.8	1.27114	-1.3599	down
Jmzn006005	C10H10O3	3,4-Methylenedioxy cinnamyl alcohol	Lignans and Coumarins	58095-76-4	168606	123545	47074.7	31585.1	33371.3	36835.7	1.22492	-1.73662	down
Lmhp009129	C23H48NO7P	LysoPC 15:0(2n isomer)	Lipids	-	1.34462e+06	3.22139e+06	2.11336e+06	680558	867091	947225	1.32639	-1.42075	down
Zblp002839	C9H10O3	3-(3-Hydroxyphenyl)-propionic acid	Phenolic acids	621-54-5	2.56173e+06	3.82663e+06	2.90797e+06	612961	826150	871293	1.48202	-2.00852	down
MWSslk208	C20H30O2	Kaurenoic Acid	Terpenoids	6730-83-2	407839	71902.9	55505.3	9	9	9	1.50014	-14.275	down
mws0145	C8H8O3	O-Anisic acid (2-Methoxybenzoic acid)	Phenolic acids	529-75-9	6262.8	9495.96	9746.94	11115.8	23448.8	25722.3	1.21401	1.24102	up
Cmyn001328	C15H16O9	Daphnin	Lignans and Coumarins	486-55-5	34505.9	58836.8	51681.3	11668.2	22592.4	21860.1	1.33146	-1.36969	down
Lmcn002982	C9H10O5	Methyl 3-O-Methyl Gallate	Phenolic acids	3934-86-9	122943	132594	125500	27856.6	37068	36783.9	1.50076	-1.90549	down
mws0282	C11H12N2O2	L-Tryptophan	Amino acids and derivatives	73-22-3	3.24971e+07	22425286	1.6198e+07	9.88064e+06	6.99429e+06	8.91269e+06	1.37695	-1.46358	down
Smcn001947	C29H36O15	Acteoside; Verbascoside	Phenolic acids	61276-17-3	9	5.09602e+06	49549.2	9	9	9	1.06164	-17.54	down
mws0866	C6H13O9P	D-Glucose 6-phosphate	Others	56-73-5	3.50512e+06	6.3142e+06	4.4461e+06	1.34528e+07	1.2822e+07	1.32275e+07	1.43154	1.46942	up
HJKP000649	C8H9NO	N-benzylformamide	Alkaloids	6343-54-0	1.71505e+06	1.04578e+06	975345	562766	432639	624183	1.34866	-1.20594	down
Lmxn010778	C21H28O5	Candelabrone 12-methyl ether	Terpenoids	-	4637.48	4895.54	239367	266625	774558	139212	1.08952	2.24563	up
pme2679	C6H13NO2	L-Allo-isoleucine	Amino acids and derivatives	1509-34-8	2.20504e+06	1.59431e+06	1.11578e+06	423320	438722	668778	1.39519	-1.68293	down
Lmsn002247	C13H16O8	1-O-Salicyloyl-β-D-glucose	Phenolic acids	60517-74-0	175524	590787	825165	107947	126580	109649	1.25561	-2.20914	down
Lhdp102526	C30H48O4	19-Hydroxyursolic acid	Terpenoids	-	7412.08	6730.81	6083.58	17321.6	24084.9	19491.7	1.49409	1.59015	up
MWS1855	C6H8N2	2,5-Dimethyl pyrazine	Alkaloids	123-32-0	97278.7	107742	222162	53027.8	68303.8	60406.5	1.25315	-1.23299	down
mws0924	C6H10O4	2-Methylglutaric acid	Organic acids	617-62-9	85714.5	27620.5	44624.9	70618.2	1.76829e+06	1.74023e+06	1.1506	4.50198	up
mws0208	C6H10O4	Adipic Acid	Organic acids	124-04-9	85714.5	27620.5	44624.9	70618.2	1.76829e+06	1.74023e+06	1.1506	4.50198	up
pmn001435	C42H68O15	Prunellin A	Terpenoids	-	113632	7152.17	28207.4	260321	373259	315858	1.27897	2.67184	up
pme0282	C8H6O4	Phthalic acid	Phenolic acids	88-99-3	88823.9	87979.3	63415	44343.1	38204	33064.6	1.41161	-1.05506	down
mws1090	C6H13O9P	Glucose-1-phosphate	Others	59-56-3	3.19938e+06	5.5638e+06	4.44736e+06	1.25738e+07	1.1636e+07	1.03212e+07	1.42506	1.3862	up
pme0006	C5H9NO2	L-Proline	Amino acids and derivatives	147-85-3	4.47541e+06	2.62138e+06	2.20281e+06	1.85391e+06	1.25994e+06	1.38607e+06	1.23311	-1.04727	down
pme3096	C3H5NO4	Aminomalonic acid	Organic acids	1068-84-4	669600	335831	419434	938277	1.23992e+06	1.28847e+06	1.37512	1.28272	up
pmb2319	C23H48NO7P	LysoPC 15:0	Lipids	108273-89-8	1.14616e+06	2.6179e+06	1.74864e+06	547582	789175	708706	1.33719	-1.43033	down
Lmbn005287	C18H32O4	7S,8S-DiHODE; (9Z,12Z)-(7S,8S)-Dihydroxyoctadeca-9,12-dienoic acid	Lipids	143288-65-7	4.11302e+06	7.42502e+06	5.88715e+06	1.66904e+07	1.56788e+07	2.03583e+07	1.42479	1.59738	up
Ymjm000154	C13H18O7	Salicin	Phenolic acids	138-52-3	65646.6	269886	210176	57599.6	36936.7	70194	1.16536	-1.72802	down
MWSCX017	C9H8O3	4-hydroxyphenyl acrylaldehyde	Others	-	261560	153215	145821	31688.9	120245	32439.4	1.1883	-1.60433	down
pme3968	C6H7N5O	7-Methylguanine	Nucleotides and derivatives	578-76-7	3.16663e+06	5.64265e+06	3.80359e+06	1.27381e+06	1.15737e+06	1.42052e+06	1.46057	-1.71133	down
MWS2413	C5H9NO3	N-acetyl-beta-alanine	Amino acids and derivatives	3025-95-4	122844	200834	151435	60908.8	76414.6	71938.1	1.41928	-1.18296	down
pmb3142	C13H16O8	Salicylic acid-2-O-glucoside	Phenolic acids	10366-91-3	506435	2.2439e+06	3.2575e+06	245012	242585	227590	1.31019	-3.07045	down
Lmmn002260	C27H36O12	5'-Methoxyisolariciresinol-9'-O-glucoside	Lignans and Coumarins	-	658603	419737	378974	114429	104015	98701.5	1.47053	-2.2001	down
pme3388	C7H16N4O2	Homoarginine	Amino acids and derivatives	156-86-5	302964	265599	209628	597185	482079	595733	1.43693	1.10596	up
Zbbp009970	C15H18O3	Mansonone S	Others	-	181552	185379	124793	8655.39	8412.13	13011.3	1.50575	-4.03103	down
Lmgp002593	C7H6O2	3-hydroxybenzaldehyde	Phenolic acids	100-83-4	3.43466e+06	665988	708465	4.64551e+06	4.80023e+06	4.49463e+06	1.21533	1.53543	up
mws1094	C15H12O6	Aromadendrin (Dihydrokaempferol)	Flavonoids	480-20-6	2334.38	1489.54	1581.99	4031.16	6355.9	1767.44	1.03569	1.16888	up
mws1333	C12H22O11	Melibiose	Others	585-99-9	1.10226e+06	228823	154308	124808	62450.1	143522	1.01069	-2.1669	down
Li512114	C31H50O4	2,3-Dihydroxyurs-12-en-28-oic acid methyl ester (Corosolic acid methyl ester)	Terpenoids	4518-70-1	26032.9	45914.9	20385.7	60310.6	88639	75750.1	1.31811	1.28307	up
Lmbn001609	C6H10O4	2-Acetyl-2-Hydroxybutanoic Acid	Organic acids	-	43524.2	70696	55736.2	222385	196969	175583	1.46765	1.80757	up
Zmhn001793	C15H18O9	6-O-Caffeoyl-D-glucose	Phenolic acids	-	740671	689142	229879	53459.3	76998.1	103730	1.38019	-2.82518	down
Zajp007311	C20H20O7	3',4',5',5,7-Pentamethoxyflavone	Flavonoids	53350-26-8	46968.1	21107.8	50318	21582.7	20481.1	14947.5	1.11054	-1.05427	down
Hmgp002327	C11H9O2N	3-amino-2-naphthoic acid	Alkaloids	-	3.06658e+06	2.31804e+06	1.41773e+06	853237	619720	715179	1.38308	-1.63633	down
Zmzn000079	C4H9O7P	D-Erythrose-4-phosphate	Others	585-18-2	146545	299650	250057	506991	503147	444664	1.30953	1.06314	up
NK10251888	C8H18N4O2	NG,NG-Dimethyl-L-arginine	Amino acids and derivatives	30315-93-6	1.32993e+06	1.02224e+06	1.14228e+06	4.76516e+06	4.52031e+06	5.51054e+06	1.50411	2.08207	up
mws1433	C18H19NO4	N-Feruloyltyramine	Alkaloids	66648-43-9	26749.8	39412.5	22302.8	13413.5	20732.2	7849.77	1.15341	-1.07487	down
pme0057	C4H9NO2S	L-Homocysteine	Amino acids and derivatives	6027-13-0	1.0604e+06	274600	203835	155700	88873.9	189414	1.02954	-1.82611	down
MWSmce370	C8H8O3	4-Hydroxyphenylacetic acid	Phenolic acids	156-38-7	13908.8	17530.1	15364.5	3678.16	3524.69	6741.02	1.44435	-1.74698	down
pme0519	C12H22O11	D-Sucrose	Others	57-50-1	1.56442e+06	4.2236e+06	4.8816e+06	1.29546e+06	1.83677e+06	1.94188e+06	1.00485	-1.07228	down
pmb2507	C5H11O7P	2-Deoxyribose-1-phosphate	Nucleotides and derivatives	17210-42-3	155079	266123	263181	562044	617236	382296	1.32644	1.19013	up
Hmbn002692	C22H30O14	6'-O-Feruloyl-D-sucrose	Phenolic acids	118230-77-6	207862	423062	814955	787100	1.05869e+06	1.3005e+06	1.09536	1.1217	up
MWSmce116	C10H13N5O3	5'-Deoxyadenosine	Nucleotides and derivatives	4754-39-6	550281	899248	968896	2.22386e+06	2.91871e+06	2.27167e+06	1.43041	1.61623	up
pme1654	C12H18O3	Jasmonic acid	Organic acids	77026-92-7	29033	25337.1	17922.4	92142.8	201598	226925	1.44413	2.84844	up
Ymjm000152	C12H16O7	p-Hydroxypheny-β-D-allopyranoside	Phenolic acids	-	11653.8	34673.5	49837.9	1856.85	8751.76	2477.31	1.2829	-2.8775	down
MWSmce040	C8H8O3	Isovanillin	Phenolic acids	621-59-0	2.73081e+06	1.24807e+06	2.01574e+06	4.8452e+06	3.92164e+06	3.98353e+06	1.31683	1.0888	up
mws0262	C4H6O6	L-Tartaric acid	Organic acids	87-69-4	1.75415e+06	125108	211116	1.33902e+06	1.94747e+06	1.87481e+06	1.07002	1.30397	up
Zmhn000892	C13H18O8	4-O-Glucosyl-3,4-dihydroxybenzyl alcohol	Phenolic acids	-	89365	193552	213011	148900	33123.2	30877.7	1.03778	-1.21995	down
pmf0395	C18H34O2	Oleic acid	Lipids	112-80-1	37484.8	36628.3	151571	20562.3	16554	34674.3	1.04454	-1.65244	down
mws0458	C8H8O3	Vanillin; 4-Hydroxy-3-Methoxybenzaldehyde	Phenolic acids	121-33-5	5.39503e+06	3.34227e+06	4.59149e+06	1.03429e+07	9.22808e+06	8.92078e+06	1.42801	1.096	up
pmb3107	C15H20O10	Glucosyringic Acid	Phenolic acids	-	245158	1.58415e+06	234090	17135.4	31834.7	17144	1.39598	-4.96392	down
Lmhp001670	C11H22N2O3	L-Valyl-L-Leucine	Amino acids and derivatives	3989-97-7	661769	467777	791869	1.32068e+06	1.50456e+06	1.23489e+06	1.40487	1.07935	up
MWS20145	C21H22O11	Eriodictyol-7-O-glucoside	Flavonoids	38965-51-4	9	9	9	13908.6	38042.7	36282.7	1.51288	11.6742	up
Zayp004030	C28H24O17	Myricetin-3-O-(2''-galloyl)glucoside	Flavonoids	-	263710	262880	239804	9	9	9	1.51698	-14.7928	down
Lajp010867	C30H48O4	13-Hydroxy oleanolic acid-3-oxo-28-acid	Terpenoids	-	7896.45	6526.62	13748.8	3076.4	5291.15	5362.28	1.16486	-1.03694	down
Lhnp110101	C30H48O4	3,20-Dihydroxyurs-21-en-28-oic acid (Oleanderic acid)	Terpenoids	-	7896.45	6526.62	13748.8	3076.4	5291.15	5362.28	1.16486	-1.03694	down
pmb0819	C10H8N2	3-Indoleacetonitrile	Alkaloids	771-51-7	1.54101e+06	1.48351e+06	1.05692e+06	780813	494593	693704	1.36767	-1.05154	down
pmb1096	C8H7N	Indole	Alkaloids	120-72-9	1.71929e+07	1.39691e+07	1.17107e+07	9.67975e+06	1.46697e+06	2.8419e+06	1.19728	-1.6158	down
mws0341	C6H12O3	2-Hydroxyisocaproic acid	Organic acids	20312-37-2	191510	225570	292658	74069.3	75023.1	81784.9	1.484	-1.62016	down
mws0120	C8H20NO6P	Choline Alfoscerate	Lipids	28319-77-9	1.44915e+07	2.55712e+07	2.46444e+07	7.97805e+06	5.18478e+06	5.22369e+06	1.43249	-1.81528	down
MWSmce675	C12H16O7	Arbutin	Phenolic acids	497-76-7	12771.4	35004.9	43467	2716.38	4223.84	3143.99	1.42358	-3.17762	down
MWSmce177	C12H14O4	Ethyl ferulate	Phenolic acids	4046-02-0	17877.8	35418.1	24029	253268	315983	169996	1.47679	3.25705	up
Zmpn000638	C4H9N3O2	3-Guanidinopropionic acid	Organic acids	353-09-3	3.25885e+06	5.9072e+06	3.60592e+06	1.2519e+06	1.4563e+06	1.39238e+06	1.44183	-1.63908	down
mws0258	C6H13NO2	L-Isoleucine	Amino acids and derivatives	73-32-5	2.48868e+06	2.07017e+06	1.87937e+06	1.43443e+06	731465	783516	1.32634	-1.12624	down
pmb0782	C5H11N	Piperidine	Alkaloids	110-89-4	1.02076e+07	7.44053e+06	6.89093e+06	3.7439e+06	2.70812e+06	2.96555e+06	1.4403	-1.38166	down
Lmrn003000	C9H10O3	2-Hydroxy-3-phenylpropanoic acid	Phenolic acids	7326-19-4	15784.4	22280.3	19550.6	6863.59	16725.8	4971.61	1.10278	-1.01241	down
Lmhp007598	C27H52NO7P	LysoPC 19:2(2n isomer)	Lipids	-	98744.1	50557.7	56255.7	193521	148277	239743	1.37537	1.50034	up
pmb0962	C10H22N2O4	L-Lysine-Butanoic Acid	Amino acids and derivatives	80407-71-2	430248	2.45802e+06	50809.2	56229.1	15064.8	7208.18	1.164	-5.22649	down
MWS201447	C12H16N2O3	Phe-Ala	Amino acids and derivatives	3918-87-4	230808	157568	203116	382080	519463	431276	1.44542	1.17205	up
pme3382	C6H11NO4	N-Acetyl-L-threonine	Amino acids and derivatives	17093-74-2	778131	591698	289530	190578	214728	238724	1.23974	-1.36543	down
MWSmce031	C15H20O3	Micheliolide	Terpenoids	68370-47-8	153406	155961	43102.3	20713.3	36096.8	35256	1.20289	-1.93676	down
MWSmce454	C8H8O3	3,5-Dihydroxyacetophenone	Phenolic acids	51863-60-6	53387.7	30750.4	31201.4	7248.5	11350.2	15494.1	1.37036	-1.75835	down
MWS0132	C20H32N6O12S2	Oxiglutatione	Amino acids and derivatives	27025-41-8	3.12933e+06	4.26069e+06	3.11381e+06	921113	1.40017e+06	1.25123e+06	1.45294	-1.5559	down
Zmdp000972	C4H9NO2S	S-Methyl-L-cysteine	Amino acids and derivatives	1187-84-4	1.3403e+06	885601	723199	520075	376814	490197	1.31725	-1.08822	down
Hmln000873	C13H16O10	2-O-Galloyl-D-glucose	Phenolic acids	-	240443	956217	726455	36413.8	45602.9	23345.7	1.4432	-4.19001	down
Zazp002547	C11H12N2O2	cyclo-(Gly-Phe)	Amino acids and derivatives	10125-07-2	5.633e+06	4.50573e+06	2.76186e+06	1.55119e+06	1.04062e+06	1.46819e+06	1.3938	-1.66789	down
mws0227	C6H13NO2	L-Leucine	Amino acids and derivatives	61-90-5	2.7883e+06	1.7899e+06	1.84706e+06	1.04601e+06	576455	771210	1.38442	-1.42453	down
Lmbn004790	C11H14O4	Methyl 3-(3-hydroxy-4-methoxyphenyl)propanoate	Phenolic acids	129150-61-4	2.72266e+06	2.67576e+06	1.65493e+06	479660	496613	426469	1.48018	-2.33006	down
MWS1846	C8H8O3	Phenoxyacetic acid	Phenolic acids	122-59-8	18053.5	10144	18198.5	30425.8	42534	47541.7	1.37349	1.37698	up
Hmcp002399	C23H24O13	Limocitrin-3-O-glucoside	Flavonoids	-	57978.7	48363.4	18137.7	83531.7	85035.4	89235.4	1.15715	1.05035	up
Lmtn002796	C21H22O11	Aromadendrin-7-O-glucoside	Flavonoids	28189-90-4	9	9	9	97324.6	98635.9	144295	1.5157	13.6214	up
mws0736	C8H16N2O3	N-Glycyl-L-leucine	Amino acids and derivatives	869-19-2	500892	560258	721736	1.19054e+06	1.41153e+06	1.23063e+06	1.44946	1.10415	up
Lmyp010262	C15H12O4	2-Acetoxymethyl-anthraquinone	Quinones	-	4.80988e+06	3.98772e+06	4.78012e+06	1.24534e+07	1.20797e+07	1.09092e+07	1.50462	1.38423	up
MWS00330g	C5H9NO2	1-Amino-1-cyclobutane-carboxylic-acid	Amino acids and derivatives	22264-50-2	4.63015e+06	2.69723e+06	2.3885e+06	1.86437e+06	1.35795e+06	1.45747e+06	1.26442	-1.0539	down
Lskp211472	C30H46O6	2,3,19-Trihydroxy-24-oxo-olean-12-en-28-oic acid	Terpenoids	-	4318.54	6134.69	12787.1	12610.2	24823.8	15189.6	1.15347	1.17908	up
pme3009	C6H6O6	Trans-Citridic acid	Organic acids	4023-65-8	316510	168436	192154	135124	65168.5	94768.8	1.25305	-1.19835	down
pme2828	C6H5NO3	4-Nitrophenol	Phenolic acids	100-02-7	5.49435e+07	3.69915e+07	3.63307e+07	2.83358e+07	1.03544e+07	1.77718e+07	1.23576	-1.18378	down
Lmhp009187	C20H42NO7P	LysoPE 15:0	Lipids	-	372896	1.05086e+06	700029	218983	267334	289098	1.2759	-1.4536	down
Lmtp007747	C15H22O2	Santalic acid	Terpenoids	73590-17-7	2.44959e+06	3.06128e+06	919620	815029	909224	488699	1.14663	-1.53896	down
pme1086	C10H17N3O6S	Glutathione reduced form	Amino acids and derivatives	70-18-8	1.78354e+07	1.55776e+07	1.32466e+07	6.53186e+06	6.71441e+06	7.04477e+06	1.47989	-1.20133	down
Lmbn001676	C6H10O4	3-Hydroxy-3-Methyl-2-Oxopentanoic Acid	Organic acids	-	34370.2	44487.2	49387	158499	130591	143303	1.48098	1.75345	up
MWS5136	C6H10O4	Mono-Methyl Glutarate	Organic acids	1501-27-5	34370.2	44487.2	49387	158499	130591	143303	1.48098	1.75345	up
mws1051	C15H23N6O5S+	S-Adenosylmethionine	Amino acids and derivatives	485-80-3	8.61442e+06	8.21704e+06	6.69963e+06	3.30494e+06	3.61164e+06	3.72551e+06	1.48062	-1.14479	down
pmn001690	C16H24O7	3-Hydroxy-4-isopropylbenzylalcohol-3-O-glucoside	Phenolic acids	-	1.30677e+06	1.21248e+06	1.30115e+06	608986	557321	561128	1.50973	-1.14509	down
mws1629	C15H22O9	Aucubin	Terpenoids	479-98-1	1.16948e+06	1.3963e+07	1.04004e+07	9	9	9	1.51038	-19.851	down
Lmbn005487	C18H34O4	12,13-DHOME; (9Z)-12,13-Dihydroxyoctadec-9-enoic acid	Lipids	263399-35-5	1.36797e+06	1.71842e+06	1.63677e+06	4.7687e+06	4.52252e+06	6.11293e+06	1.47959	1.70549	up
MWS2070	C10H12O3	Propyl 4-hydroxybenzoate	Phenolic acids	94-13-3	42695.4	41229.9	44100.9	248074	245296	149649	1.4905	2.32842	up
Zmgn004894	C8H8O3	Methyl 4-hydroxybenzoate	Phenolic acids	99-76-3	602000	315401	449851	1.14698e+06	933658	788807	1.33595	1.06949	up
Smgp004575	C21H20O12	Quercetin-5-O-β-D-glucoside	Flavonoids	-	63850.6	3.99132e+06	200859	9	9	9	1.48424	-17.2662	down
MWSHY0046	C21H20O12	Quercetin-3-O-glucoside (Isoquercitrin)	Flavonoids	482-35-9	63850.6	3.99132e+06	200859	9	9	9	1.48424	-17.2662	down
Lhdp102528	C30H46O4	3-Oxo-19-hydroxyurs-12-en-28-oic acid (Pomonic acid)	Terpenoids	13849-90-6	175787	15194.9	217864	9	9	9	1.48718	-13.8863	down
Lmtn002324	C19H28O11	Benzyl-(2''-O-glucosyl)glucoside	Phenolic acids	-	235409	454240	295716	144383	165884	146534	1.34486	-1.10909	down
Lmyp010766	C15H10O3	3-Hydroxy-2-methyl-anthraquinone	Quinones	-	417840	623628	897846	173169	121149	197387	1.42667	-1.97968	down
Zbdp002220	C14H20O9	2,6-Dimethoxypydroquinone-1-O-glucoside	Flavonoids	-	206439	232243	169518	9	9	9	1.51689	-14.4593	down
pme2459	C21H20O11	Luteolin-7-O-glucoside (Cynaroside)	Flavonoids	5373-11-5	405829	2.13133e+06	440611	194296	184062	200368	1.19216	-2.36328	down
Zmbp002538	C11H12N2O2	1-Methoxy-indole-3-acetamide	Alkaloids	-	5.36556e+06	4.04194e+06	2.46568e+06	1.43172e+06	928626	1.15936e+06	1.38843	-1.75418	down
pmb3068	C16H18O8	1-O-p-Coumaroylquinic acid	Phenolic acids	-	382132	1.29935e+07	27271.4	7762.75	7807.65	12509	1.14302	-8.89882	down
Lmxn008550	C36H58O11	Pruvuloside B	Terpenoids	-	9	9	9	1728.19	3024.18	615.884	1.49904	7.63535	up
Lmdn001925	C26H34O12	Olivil-4'-O-glucoside	Lignans and Coumarins	76880-93-8	261281	486571	314535	25408.8	36185.7	30460.9	1.49663	-3.52866	down
pmc0066	C10H13N4O7P	2'-Deoxyinosine-5'-monophosphate	Nucleotides and derivatives	3393-18-8	3.39478e+06	371234	158928	4.07469e+06	3.61268e+06	4.78083e+06	1.12264	1.66751	up
mws0005	C10H12N2	Tryptamine	Alkaloids	61-54-1	174988	75845.6	64689.1	42399.2	14061.8	23319.1	1.27378	-1.98364	down
Zmgp003208	C20H24O5	5-hydroxy-1-phenyl-7-(3,4-dihydroxy-5-methoxyphenyl)-3-heptanone	Others	-	24600.2	19734.2	28267.4	160490	236560	310978	1.48919	3.28573	up
MWS20152	C22H26O8	Syringaresinol	Lignans and Coumarins	21453-71-4	347983	210414	102086	74640.1	138726	66430.4	1.01142	-1.23915	down
pme2289	C20H30O	Retinol (Vitamin A1)	Others	68-26-8	204109	345041	247115	872372	1.10391e+06	401037	1.27465	1.57802	up
Hmmn002544	C16H20O9	Ferulic acid-4-O-glucoside	Phenolic acids	117405-51-3	84287.3	102205	90061.3	43560.7	45529.8	25656.9	1.38809	-1.2691	down
Wbmp002612	C14H18O8	Methyl (6-O-4-hydroxybenzoyl)-α-D-glucoside	Phenolic acids	-	34446.5	34959.4	74219.9	25440.1	11004.7	15948	1.255	-1.45487	down
Zmhn002750	C22H22O11	4-O-(6'-O-Glucosylcaffeoyl)-4-hydroxybenzoic acid	Phenolic acids	-	2967.59	11360.4	3846.85	9	9	9	1.5079	-9.39476	down
pma0149	C15H16O9	Sinapoyl malate	Phenolic acids	92344-58-6	667629	373782	245630	119331	117438	193039	1.27486	-1.58229	down
mws0921	C9H10O2	p-Coumaryl alcohol	Phenolic acids	3690-05-9	13354.8	10770.8	15109.2	30821.1	31158.9	26953	1.47319	1.18059	up
HJN003	C17H22O10	1-O-Sinapoyl-β-D-glucose	Phenolic acids	-	233838	226506	220021	44954.1	62395.3	41352.5	1.48978	-2.19389	down
Zmxn110201	C14H20O9	2,6-Dimethoxy-4-hydroxyphenol-1-O-ß-D-glucopyranoside	Others	-	2421.85	15183.2	15410.5	9	9	9	1.49845	-10.256	down
Zbzp007397	C11H16O2	5,6,7,7a-tetrahydro-4,4,7a-trimethyl-2(4H)-benzofuranone	Others	15356-74-8	545052	850029	931985	157812	146927	322471	1.40334	-1.89149	down
HJN102	C34H30O15	3,4,5-Tricaffeoylquinic acid	Phenolic acids	86632-03-3	111847	9	127543	9	9	9	1.05625	-13.1142	down
pme1474	C11H15N5O3S	5'-Deoxy-5'-(methylthio)adenosine	Nucleotides and derivatives	2457-80-9	3.02168e+06	2.89254e+06	2.41848e+06	978643	969784	1.19621e+06	1.49057	-1.40589	down
pmp001288	C28H32O14	Acacetin-7-O-rutinoside (Linarin)	Flavonoids	480-36-4	60511.7	47263.7	36666.2	9223.22	15428	18663.5	1.39593	-1.73756	down
MWSmce184	C12H10O4	Ethyl 3-coumarincarboxylate	Lignans and Coumarins	1846-76-0	115196	188975	136782	46311.8	81455.2	37289.7	1.32625	-1.41767	down
pme2743	C10H11NO3	N-Phenylacetylglycine	Amino acids and derivatives	500-98-1	418860	138852	133389	33318.1	54223.4	36608.6	1.33365	-2.47681	down
Hmmp001310	C11H9NO2	3-Indoleacrylic acid	Alkaloids	1204-06-4	2.97891e+06	2.17939e+06	1.44268e+06	801838	533555	731217	1.3941	-1.67542	down
Lmsp004450	C20H22O6	Dehydrodiconiferyl alcohol	Lignans and Coumarins	4263-87-0	518938	437382	404557	186265	212867	204007	1.47915	-1.17397	down
pmb3074	C16H18O8	5-O-p-Coumaroylquinic acid	Phenolic acids	1899-30-5	701116	2.84538e+06	581909	89354.1	85251.2	49911.1	1.41242	-4.20069	down
Lmdp004892	C24H22O14	Kaempferol-3-O-(6''-malonyl)galactoside	Flavonoids	-	2.18228e+06	7.4298e+07	2.4589e+07	2.02698e+06	1.87966e+06	2.78495e+06	1.06643	-3.91685	down
Lmmp003817	C24H22O14	Kaempferol-3-O-(6''-malonyl)glucoside	Flavonoids	-	2.18228e+06	7.4298e+07	2.4589e+07	2.02698e+06	1.87966e+06	2.78495e+06	1.06643	-3.91685	down
mws0089	C21H20O11	Kaempferol-7-O-glucoside	Flavonoids	16290-07-6	51994.5	5.65772e+06	438715	57394.2	34655	42949.4	1.03648	-5.5092	down
MWS20155	C18H16O8	Rosmarinic acid	Phenolic acids	537-15-5	68291.6	27163.3	69551.8	13761.9	10629.1	10955	1.38161	-2.22291	down
MWS3270	C7H5NO4	Quinolinic Acid	Alkaloids	89-00-9	156228	418846	163895	105083	89605.1	99367.6	1.20374	-1.32942	down
Hmcp002187	C23H24O13	Limocitrin-3-O-galactoside	Flavonoids	-	36166.4	19164.8	25077.1	138512	60323.1	87155.3	1.36365	1.83055	up
pme1184	C10H13N5O4	2'-Deoxyguanosine	Nucleotides and derivatives	961-07-9	106174	506245	330628	838781	829465	798602	1.15743	1.38727	up
Hmqp003184	C29H30O18	Luteolin-7-O-(6''-malonyl)glucoside-5-O-arabinoside	Flavonoids	-	27776.5	11571	17828.4	1.07846e+06	189695	105162	1.33926	4.58611	up
pmn001421	C16H18O8	3-O-p-Coumaroylquinic acid	Phenolic acids	87099-71-6	686105	2.70134e+06	557341	50162.5	36078.7	43904	1.45309	-4.92175	down
mws5028	C7H5NO2	2-Benzoxazolinone	Alkaloids	59-49-4	123207	64020.4	136773	67856.1	43709.1	14526.4	1.07403	-1.36152	down
Wafn001957	C15H16O11	2-O-Caffeoylglucaric Acid	Phenolic acids	-	110088	255209	215368	44020.9	46965.1	118358	1.22943	-1.47183	down
pme2598	C8H8O4	3,4-Dihydroxybenzeneacetic acid	Phenolic acids	102-32-9	128106	151507	88129.3	346318	436782	461426	1.45447	1.75883	up
pme1292	C8H8O4	Homogentisic acid	Phenolic acids	451-13-8	220425	44843.9	95661.9	211231	302028	247167	1.09643	1.07509	up
Wmzn000227	C6H10O4	2,2-Dimethylsuccinic acid	Organic acids	597-43-3	15280.3	30836.7	29739.3	48591.9	73062.5	40733.3	1.22155	1.0981	up
Wmhp000012	C17H26O10	Ajugoside	Terpenoids	52916-96-8	14676.5	19277.1	26884.5	9	9	9	1.51641	-11.1378	down
Lmtn003096	C26H36O11	Secoisolariciresinol 4-O-glucoside	Lignans and Coumarins	-	236151	55102.3	233686	33049.8	18710.4	69338.7	1.15086	-2.11597	down
Hmcp002207	C22H22O12	Isorhamnetin-7-O-glucoside (Brassicin)	Flavonoids	6743-96-0	39384	162119	30027	14973.1	13593	16035.5	1.21451	-2.37603	down
Lmjp003044	C22H22O12	Isorhamnetin-3-O-Glucoside	Flavonoids	5041-82-7	39384	162119	30027	14973.1	13593	16035.5	1.21451	-2.37603	down
MWSmce591	C15H22O2	Curcumenol	Terpenoids	19431-84-6	417752	835129	630846	199401	109865	247140	1.37478	-1.75938	down
pmb2673	C9H9NO5	6-Hydroxydopaquinone	Amino acids and derivatives	135791-48-9	23816.8	18036.6	11013.2	6604.12	7107.4	8390.46	1.31221	-1.25818	down
Cmsp003083	C26H32O11	Dehydrodiconiferyl alcohol-4-O-glucoside	Lignans and Coumarins	107870-88-2	954581	332862	375619	97689.6	54914	80281.9	1.4045	-2.83615	down
pme2559	C6H9NO5	N-Acetyl-L-Aspartic Acid	Amino acids and derivatives	997-55-7	387948	126725	449748	39398.2	58537.5	54064	1.3546	-2.6656	down
MWSslk154	C12H20O7	Triethyl citrate	Organic acids	77-93-0	187746	184307	105948	65208.6	45951.6	102127	1.24612	-1.16422	down
pme3705	C6H10O7	D-Glucoronic acid	Others	6556-12-3	219504	165741	188041	74405.5	65872.1	58355.4	1.48051	-1.52915	down
Lmsp003655	C26H32O11	Dehydrodiconiferyl alcohol-gamma'-O-glucoside	Phenolic acids	-	813146	428572	377635	30556.1	60092.6	51429.5	1.45993	-3.51066	down
Rfmb25702	C28H34O12	Pinoresinol-4-O-(6''-acetyl)glucoside	Lignans and Coumarins	-	133293	99539	112054	32569.3	41592.2	61961.2	1.39485	-1.34121	down
Zmhn001446	C28H36O13	Syringaresinol-4'-O-glucoside	Lignans and Coumarins	7374-79-0	659835	539941	294515	176603	91707.1	176881	1.33994	-1.74696	down
pma0702	C29H39N3O8	N1,N8-Bis(sinapoyl)spermidine	Alkaloids	-	20507.3	12197.8	26978.3	4618.1	4717.72	5551.23	1.42569	-2.00327	down
mws2209	C21H20O11	Kaempferol-3-O-glucoside (Astragalin)	Flavonoids	480-10-4	581865	390555	418736	208526	187221	204381	1.44352	-1.21294	down
pme1816	C16H18O9	Neochlorogenic acid (5-O-Caffeoylquinic acid)	Phenolic acids	906-33-2	204634	496050	291686	116318	103979	209297	1.20082	-1.2079	down
Hmpp003270	C21H20O11	Luteolin-4'-O-glucoside	Flavonoids	6920-38-3	217615	7.19667e+06	1.34096e+06	99026.1	105154	100981	1.20516	-4.84251	down
CAS: Chemical Abstracts Service. TH: T. chinense. THC: T. chinense chimera.

## Sheet: Table S3
Table S3: The differentially accumulated metabolites (DAMs) in the P. vulgaris and P. vulgaris chimera.
Index	Formula	Compounds	Category	CAS	P1	P2	P3	PC1	PC2	PC3	VIP	log2FoldChange	Type
Zmdp001663	C10H18N2O5S	γ-glutamylmethionine	Amino acids and derivatives	17663-87-5	364573	99316	575068	1.63711e+06	1.06915e+06	1.29521e+06	1.26226	1.94539	up
Zmdp002216	C11H20N2O5	L-γ-Glutamyl-L-leucine	Amino acids and derivatives	2566-39-4	3.04805e+06	4.58434e+06	4.07133e+06	9.46652e+06	7.4363e+06	9.6053e+06	1.45176	1.17947	up
Zbdn001947	C13H18O8	Isotachioside	Phenolic acids	31427-08-4	1.64671e+06	1.80967e+06	1.70205e+06	779012	769994	933409	1.53601	-1.05519	down
mws0214	C6H14O6	D-Sorbitol	Others	50-70-4	4845.4	3980.9	5295.22	11989.6	34165.7	20129.8	1.40695	2.23079	up
Hmln002355	C27H34O12	5'-Methoxymatairesinoside	Lignans and Coumarins	1691201-82-7	1.18349e+06	632205	575854	2.18982e+06	1.57894e+06	3.73342e+06	1.30372	1.64937	up
Rfmb091	C18H32O3	9S-Hydroxy-10E,12Z-octadecadienoic acid	Lipids	15514-85-9	139616	199625	161605	349782	415109	298931	1.46788	1.08682	up
Lmgn000224	C5H6O5	2-Methyl-3-oxosuccinic acid	Organic acids	-	73233	89224.6	62855.4	89386.5	192625	331898	1.09329	1.44609	up
pmb0818	C11H11NO3	Methoxyindoleacetic acid	Alkaloids	3471-31-6	2.46646e+06	4.1999e+06	4.28663e+06	1.01766e+07	7.14228e+06	7.99654e+06	1.3972	1.20869	up
pmb2804	C18H32O4	13S-Hydroperoxy-9Z,11E-octadecadienoic acid	Lipids	33964-75-9	1.03299e+06	1.05489e+06	932988	2.82819e+06	6.26192e+06	2.90654e+06	1.44359	1.9896	up
MWSHY0140	C16H12O4	3-Hydroxy-3'-methoxyflavone	Flavonoids	76666-32-5	212712	402317	530874	136657	119125	140497	1.36613	-1.5319	down
MWSmce119	C6H14N4O2	L-Arginine	Amino acids and derivatives	74-79-3	8.61608e+06	4.79706e+07	4.37762e+07	1.08761e+08	5.52671e+07	7.3912e+07	1.03958	1.24537	up
Hmhn007023	C30H48O6	2,3,19-Trihydroxyurs-12-en-28-oic acid	Terpenoids	-	2.59919e+06	2.60644e+06	2.81424e+06	8.23689e+06	7.2411e+06	6.45594e+06	1.54197	1.45151	up
pmb0889	C18H30O2	Punicic acid (9Z,11E,13Z-octadecatrienoic acid)	Lipids	544-72-9	805351	744893	667469	2.02199e+06	3.0292e+06	2.27856e+06	1.5107	1.72469	up
Lmsn010896	C30H46O6	23-Formyl-2,3,19-trihydroxyurs-12-en-28-oic acid (Pinfaensic acid)	Terpenoids	-	1.20628e+06	402910	504983	4.49924e+06	3.39275e+06	1.58445e+06	1.36545	2.16425	up
mws0001	C4H8N2O3	L-Asparagine	Amino acids and derivatives	70-47-3	2.46283e+06	2.33836e+06	2.10342e+06	1.3241e+07	1.02946e+07	8.81734e+06	1.54236	2.22826	up
MWSmce220	C6H10O6	D-Glucono-1,5-lactone	Others	90-80-2	815266	850461	703785	247798	229437	541953	1.36579	-1.21717	down
mws0236	C2H7NO3S	2-Aminoethanesulfonic acid	Organic acids	107-35-7	33434.1	35672.3	20696.7	136607	128042	63803.3	1.44299	1.87085	up
MWSmce083	C11H12O4	Ferulic acid methyl ester	Phenolic acids	2309-07-1	1.41118e+06	1.73864e+06	1.02478e+06	5.67299e+06	5.54757e+06	3.41518e+06	1.48696	1.80978	up
pmn001694	C18H34O5	9,10,13-Trihydroxy-11-Octadecenoic Acid	Lipids	29907-57-1	559850	521750	294724	1.00966e+06	1.42915e+06	531737	1.16877	1.10991	up
mws0180	C7H6O4	2,5-Dihydroxybenzoic acid; Gentisic Acid	Phenolic acids	490-79-9	5.84673e+06	1.00432e+07	8.65387e+06	2.67518e+06	2.92054e+06	3.05497e+06	1.47831	-1.50447	down
mws0183	C7H6O4	3,4-Dihydroxybenzoic acid (Protocatechuic acid)	Phenolic acids	99-50-3	1.24521e+07	2.32507e+07	1.97188e+07	5.96524e+06	6.56668e+06	6.76944e+06	1.45653	-1.52174	down
pme0008	C6H13N3O3	L-Citrulline	Amino acids and derivatives	372-75-8	202290	500526	458386	1.49834e+06	942515	1.08806e+06	1.36405	1.6036	up
pme2527	C5H12N2O2	L-Ornithine	Amino acids and derivatives	70-26-8	192389	185208	168998	1.31111e+06	958400	832490	1.54251	2.50466	up
mws0983	C20H39NO2	N-Oleoylethanolamine	Alkaloids	111-58-0	22565.7	24887.9	29139.2	175309	195184	279689	1.51429	3.08557	up
pme2244	C11H11NO2	3-Indolepropionic acid	Alkaloids	830-96-6	268196	425594	480640	1.3003e+06	881056	924740	1.42716	1.40314	up
MWSmce025	C16H18O10	Fraxetin-8-O-glucoside (Fraxin)	Lignans and Coumarins	524-30-1	2.24815e+06	1.75967e+06	1.07767e+06	5.02203e+06	5.1139e+06	5.50961e+06	1.45426	1.62129	up
Lmqp000427	C6H11NO3	N-Methyl-Trans-4-Hydroxy-L-Proline	Amino acids and derivatives	4252-82-8	426568	837708	2.45332e+06	340196	301816	429466	1.1015	-1.79477	down
pmc0281	C15H21N5O8	Ribosyladenosine	Nucleotides and derivatives	-	4.10936e+06	2.98753e+07	3.57129e+07	4.6018e+06	4.72985e+06	4.86388e+06	1.04322	-2.29567	down
mws0344	C5H10O6	D-Xylonic acid	Others	526-91-0	819561	1.34128e+06	1.3097e+06	5.11573e+06	3.02053e+06	3.14596e+06	1.45415	1.70082	up
Zmyn004676	C18H30O3	17-Hydroxylinolenic acid	Lipids	-	234375	100120	99216.1	366237	518259	167800	1.14062	1.27874	up
Lmhp010099	C30H52NO7P	LysoPC 22:5	Lipids	-	115999	249741	176314	1.38051e+06	718440	1.02313e+06	1.4754	2.526	up
MWS5164	C8H18N4O2	N,N'-Dimethylarginine;SDMA	Amino acids and derivatives	30344-00-4	286901	632079	602833	1.54565e+06	1.06415e+06	1.28291e+06	1.35008	1.35498	up
Zmjp000182	C7H16N4O2	N-Monomethyl-L-arginine	Amino acids and derivatives	17035-90-4	451858	1.56339e+06	1.35172e+06	4.35976e+06	2.392e+06	3.62757e+06	1.26479	1.62419	up
Wbtp007382	C19H20O6	1,2,6-trihydroxy-5-methoxy-7-(3-methylbut-2-en-1-yl)-4a,9a-dihydroxanthen-9-one	Flavonoids	-	401880	173957	189216	477243	520863	535414	1.26638	1.00321	up
Lmjp007790	C18H16O6	5-Hydroxy-3,7,4'-trimethoxyflavone	Flavonoids	-	7.1232e+06	3.89398e+06	4.26593e+06	1.13777e+07	1.36381e+07	1.17864e+07	1.42399	1.26786	up
mws1200	C10H10O3	p-Coumaric acid methyl ester	Phenolic acids	19367-38-5	60032.5	118162	196518	418015	411466	1.03264e+06	1.30481	2.31309	up
Zbzp007301	C18H28O3	2-Methoxy-6-undecyl-1,4-benzoquinone	Quinones	-	32785.3	33914.3	33368	115675	177795	105155	1.5135	1.99406	up
Lmxn015337	C17H34O2	Methyl palmitate	Lipids	112-39-0	16307.8	20198.5	26237.2	76283.9	59471.1	54348.5	1.48892	1.59925	up
mws2523	C12H23O14P	Trehalose 6-phosphate	Others	4484-88-2	111705	174688	207360	692535	709308	549231	1.49231	1.9824	up
pmn001423	C19H30O8	Roseoside	Others	54835-70-0	3.43424e+06	8.05656e+06	6.24047e+06	1.69915e+07	8.86829e+06	1.70736e+07	1.23394	1.2758	up
Zmpn000095	C6H15O9P	Sorbitol-6-phosphate	Others	20479-58-7	48375.4	101392	66537.9	244853	191540	166121	1.42806	1.47793	up
MWSmce709	C9H7N	Isoquinoline	Alkaloids	119-65-3	1.04653e+06	1.48305e+06	1.56603e+06	4.40818e+06	3.11347e+06	3.08856e+06	1.46897	1.3733	up
Zbdn002066	C13H18O8	Tachioside	Phenolic acids	109194-60-7	1.81318e+06	1.94566e+06	1.95384e+06	838006	845083	1.00466e+06	1.54128	-1.08777	down
mws1155	C6H14O6	D-Mannitol	Others	69-65-8	16998.9	20166.3	22826.5	66164.2	166571	125573	1.45036	2.57837	up
Lmrj002087	C10H18N2O5	L-Isoleucyl-L-Aspartate	Amino acids and derivatives	-	393002	1.07832e+06	481912	2.5958e+06	2.50158e+06	3.10476e+06	1.42899	2.07014	up
Lmhp008440	C20H40NO7P	LysoPE 15:1	Lipids	-	131556	374638	228487	910709	429117	748793	1.27435	1.50736	up
Lmbp000728	C8H8O	(S)-2-Phenyloxirane	Phenolic acids	20780-54-5	1.04922e+07	1.18542e+07	9.9992e+06	2.70921e+07	2.43388e+07	2.88923e+07	1.52503	1.31224	up
mws4532g	C5H12N2O2	D-Ornithine	Amino acids and derivatives	348-66-3	174874	245727	198321	999290	701940	910271	1.51851	2.07705	up
pme2253	C6H10O6	L-Gulono-1,4-Lactone	Others	1128-23-0	761902	973708	730088	216973	212114	526517	1.36872	-1.36751	down
pme0170	C8H16N4O3	N-Acetyl-L-Arginine	Amino acids and derivatives	155-84-0	265850	429892	448882	871149	686218	930626	1.37946	1.12011	up
mws0639	C7H6O4	2,3-Dihydroxybenzoic Acid	Phenolic acids	303-38-8	1.02402e+07	1.87742e+07	1.58683e+07	5.08117e+06	5.8317e+06	5.54673e+06	1.45012	-1.44723	down
Lmsp013456	C30H46O3	3-Hydroxytaraxastan-28,20-olide	Terpenoids	-	35246.5	42986.9	38915.7	102560	87012.7	122429	1.49283	1.4132	up
Zaln004057	C16H16O8	4-caffeoylshikimic acid	Phenolic acids	-	264335	688280	705374	1.77601e+06	1.63082e+06	1.21066e+06	1.32559	1.47767	up
mws0254	C6H9N3O2	L-Histidine	Amino acids and derivatives	71-00-1	1.23613e+06	2.2706e+06	1.57131e+06	9.49321e+06	4.38861e+06	7.37187e+06	1.43859	2.06537	up
mws1626	C15H18O2	Dehydrocostuslactone	Terpenoids	477-43-0	145207	232386	218000	382826	430593	488825	1.41277	1.1286	up
YC512118	C18H35NO	Oleamide (9-Octadecenamide)	Lipids	301-02-0	7360.63	7305.31	7032.67	16094	16192.3	14560.7	1.54933	1.11035	up
mws2118	C21H24O10	Phloretin-2'-O-glucoside (Phlorizin)	Flavonoids	60-81-1	14609.9	10180.1	13167.1	871370	22222.3	35453.6	1.04766	4.61331	up
mws0629	C13H16N2O5	L-Aspartyl-L-Phenylalanine	Amino acids and derivatives	13433-09-5	279537	447994	238917	2.52896e+06	2.75838e+06	2.53166e+06	1.52769	3.01622	up
mws0359	C15H30O2	Pentadecanoic Acid	Lipids	1002-84-2	1.60605e+06	2.32898e+06	2.2878e+06	4.92645e+06	5.55288e+06	3.98126e+06	1.46726	1.21648	up
Jmzn006005	C10H10O3	3,4-Methylenedioxy cinnamyl alcohol	Lignans and Coumarins	58095-76-4	84885.6	135302	239670	551502	508387	1.36662e+06	1.32567	2.39962	up
MWSslk208	C20H30O2	Kaurenoic Acid	Terpenoids	6730-83-2	280973	285727	242510	1.08875e+06	1.03129e+06	1.0944e+06	1.54353	1.98998	up
pme2380	C5H6O5	α-Ketoglutaric acid	Organic acids	328-50-7	856600	480650	331889	736783	2.00434e+06	2.12165e+06	1.1511	1.54268	up
ML10181668	C6H11NO2	Cycloleucine	Amino acids and derivatives	52-52-8	3.12153e+07	6.39935e+07	6.53973e+07	1.53135e+08	7.12204e+07	1.00731e+08	1.14597	1.0173	up
Lmhp011562	C21H36O4	1-α-Linolenoyl-glycerol	Lipids	-	516017	555820	572901	1.14877e+06	1.06626e+06	1.43053e+06	1.48472	1.14828	up
mws0282	C11H12N2O2	L-Tryptophan	Amino acids and derivatives	73-22-3	5.91783e+06	9.62754e+06	1.05732e+07	2.71507e+07	2.03628e+07	2.03759e+07	1.43601	1.37811	up
Lmqn000213	C24H42O21	Stachyose	Others	470-55-3	1.46609e+06	1.50771e+06	1.41976e+06	3.25567e+06	4.82192e+06	1.64448e+06	1.20626	1.14587	up
Lmxn010778	C21H28O5	Candelabrone 12-methyl ether	Terpenoids	-	1.12682e+07	7.65526e+06	8.736e+06	4.71891e+07	3.79251e+07	4.14575e+07	1.52834	2.19411	up
Lmsn002247	C13H16O8	1-O-Salicyloyl-β-D-glucose	Phenolic acids	60517-74-0	818688	1.91066e+06	1.84893e+06	557231	617304	766094	1.27246	-1.23828	down
Zmdp000376	C5H11N3O	4-Guanidinobutanal	Others	-	3.04694e+07	6.14779e+07	6.43043e+07	1.56265e+08	1.00126e+08	9.77209e+07	1.29983	1.18033	up
Lhdp102526	C30H48O4	19-Hydroxyursolic acid	Terpenoids	-	181210	208879	273975	518892	651852	606598	1.47673	1.42033	up
Zmzn000113	C5H9NO4	L-threo-3-Methylaspartate	Amino acids and derivatives	6061-13-8	250169	465610	457271	1.62432e+06	911977	755433	1.35428	1.48858	up
Wbtn012389	C20H20O6	1,6-dihydroxy-3,5-dimethoxy-2-(3-methylbut-2-en-1-yl)xanthen-9-one	Flavonoids	-	1.31488e+06	985091	635592	1.63223e+06	2.12339e+06	2.18155e+06	1.30799	1.01614	up
pme0014	C5H9NO4	L-Glutamic acid	Amino acids and derivatives	56-86-0	509454	806050	794615	2.26902e+06	1.44157e+06	1.31852e+06	1.39648	1.25298	up
MWSmce331	C4H7NO2	Azetidine-2-carboxylic acid	Alkaloids	2517-04-6	642445	968570	545886	2.34079e+06	1.94023e+06	1.63664e+06	1.46936	1.45606	up
Zmgp005593	C19H18O2	5-hydroxy-1,7-diphenyl-4,6-diene-3-heptanone	Others	-	1685.08	6716.67	2377.97	7862.37	8494.62	12885.5	1.21451	1.43975	up
pma1751	C12H15NO7	N-(beta-D-Glucosyl)nicotinate	Others	-	669936	1.99729e+06	2.58282e+06	6.91414e+06	2.76424e+06	4.25138e+06	1.13442	1.40777	up
MWS201412	C10H19N3O5	Lys-Asp	Amino acids and derivatives	20556-18-7	152970	267847	313565	678332	513396	474190	1.35503	1.18172	up
mws5042	C11H14N2O3	L-Glycyl-L-phenylalanine	Amino acids and derivatives	721-66-4	227588	413721	315347	1.23324e+06	675089	947612	1.41947	1.57789	up
pmb2319	C23H48NO7P	LysoPC 15:0	Lipids	108273-89-8	481037	474910	527222	757893	1.31723e+06	954810	1.38535	1.0306	up
Lmhp009682	C30H52NO7P	LysoPC 22:5(2n isomer)	Lipids	-	101500	270853	189132	1.22347e+06	768995	1.03281e+06	1.45634	2.42975	up
Lmhp009368	C30H50NO7P	LysoPC 22:6	Lipids	-	202349	327482	279955	1.64714e+06	1.38366e+06	2.30655e+06	1.49822	2.72051	up
MWS1848	C8H8O2	Phenyl acetate	Phenolic acids	122-79-2	1.28643e+06	1.67912e+06	1.87592e+06	636036	652744	755719	1.50221	-1.2437	down
pmb3142	C13H16O8	Salicylic acid-2-O-glucoside	Phenolic acids	10366-91-3	4.45534e+06	8.32757e+06	8.5211e+06	2.2282e+06	2.47975e+06	3.39754e+06	1.39837	-1.39415	down
pme3388	C7H16N4O2	Homoarginine	Amino acids and derivatives	156-86-5	198464	555368	491183	1.37796e+06	825979	1.24324e+06	1.2856	1.46925	up
Zmyn004449	C18H30O4	9-Hydroxy-12-oxo-10(E),15(Z)-octadecadienoic acid	Lipids	-	166564	130436	129922	697606	849347	393340	1.49462	2.18423	up
Lmbn005369	C18H32O3	13(S)-HODE;13(S)-Hydroxyoctadeca-9Z,11E-dienoic acid	Lipids	10219-69-9	127496	168421	158676	373979	395200	267652	1.47926	1.18953	up
mws1333	C12H22O11	Melibiose	Others	585-99-9	1.81363e+06	1.74325e+06	1.88111e+06	4.35294e+06	4.74487e+06	2.60966e+06	1.41747	1.10628	up
MWS04412	C8H18N2O2	N(6),N(6)-Dimethyl-L-lysine	Amino acids and derivatives	2259-86-1	8.49077e+06	4.7328e+07	4.17869e+07	1.04477e+08	5.82199e+07	7.51793e+07	1.0688	1.28518	up
Lmhp012042	C21H38O4	2-Linoleoylglycerol	Lipids	3443-82-1	23229.4	28805.4	18737.5	92345.6	50649.4	68997.8	1.45469	1.58276	up
Zaxn005958	C20H28O2	18-Oxoferruginol	Terpenoids	-	380684	301041	395308	1.84958e+06	1.43097e+06	1.89081e+06	1.52213	2.26348	up
Zmgp004369	C20H22O5	7-(3,4-Dihydroxyphenyl)-1-(4-hydroxy-3-methoxyphenyl)-4-en-3-heptanone	Others	-	1.12214e+06	1.25929e+06	1.08113e+06	2.34854e+06	2.41713e+06	2.40513e+06	1.53609	1.05029	up
Hmqp005412	C20H30O3	12-Hydroxyabietic Acid	Terpenoids	3484-61-5	113628	148270	178399	403088	1.21405e+06	1.38434e+06	1.3715	2.76913	up
pmb2799	C18H32O3	12,13-Epoxy-9-Octadecenoic Acid	Lipids	6799-85-5	40000.7	21893.9	49905.9	90176	75339.6	65267.9	1.28339	1.04561	up
pme0281	C8H6O4	Terephthalic acid	Phenolic acids	100-21-0	1.32022e+07	3.23583e+07	3.31224e+07	1.20684e+07	1.19998e+07	1.25394e+07	1.16823	-1.10391	down
Hmgp002327	C11H9O2N	3-amino-2-naphthoic acid	Alkaloids	-	945800	1.73392e+06	1.45362e+06	4.22021e+06	2.80001e+06	3.07359e+06	1.40769	1.28809	up
Wafn011571	C18H32O3	alpha-Hydroxylinoleic acid	Lipids	57818-44-7	115179	152272	160523	342210	380258	264695	1.47395	1.20577	up
NK10251888	C8H18N4O2	NG,NG-Dimethyl-L-arginine	Amino acids and derivatives	30315-93-6	286493	480665	587813	1.73926e+06	934983	1.25382e+06	1.37644	1.53555	up
MWSslk257	C9H14N3O8P	Cytidine 5'-monophosphate(Cytidylic acid)	Nucleotides and derivatives	63-37-6	45378.2	42380.1	66864.3	114614	87929.9	114132	1.39095	1.03426	up
mws4019	C20H28O2	Sugiol	Terpenoids	511-05-7	421108	323734	410854	2.27004e+06	1.72976e+06	1.8303e+06	1.53489	2.33476	up
Lmhp008273	C20H40NO7P	LysoPE 15:1(2n isomer)	Lipids	-	162946	374983	343389	896157	561739	698829	1.31268	1.29111	up
Rfmb087	C18H32O4	9-Hydroxy-13-oxo-10-octadecenoic Acid	Lipids	-	527287	513315	447822	1.9887e+06	2.99398e+06	1.32876e+06	1.48646	2.08418	up
Zmyn004732	C18H30O3	2R-hydroxy-9Z,12Z,15Z-octadecatrienoic acid	Lipids	-	279312	252805	245154	865844	1.22481e+06	723428	1.51369	1.85617	up
MWSmce165	C6H14O5	L-Fucitol	Others	13074-06-1	97114.9	194387	184362	431064	276475	285556	1.28693	1.06139	up
Lmhp008337	C19H40NO7P	LysoPE 14:0(2n isomer)	Lipids	-	260417	888516	557753	1.56749e+06	788177	1.86381e+06	1.12073	1.30587	up
MWSHY0202	C16H12O2	6-Methylflavone	Flavonoids	29976-75-8	9160.73	95691.7	54880.8	237004	176035	94354.4	1.10022	1.66744	up
pmb2507	C5H11O7P	2-Deoxyribose-1-phosphate	Nucleotides and derivatives	17210-42-3	78184	262239	208913	479169	652277	463193	1.29335	1.53747	up
Hmbn002692	C22H30O14	6'-O-Feruloyl-D-sucrose	Phenolic acids	118230-77-6	534912	584532	428855	1.66677e+06	1.11333e+06	903852	1.43776	1.25057	up
pme1654	C12H18O3	Jasmonic acid	Organic acids	77026-92-7	303691	297473	175259	326643	990230	481245	1.10958	1.21157	up
Ymjm000152	C12H16O7	p-Hydroxypheny-β-D-allopyranoside	Phenolic acids	-	406683	561130	563998	120145	149570	238090	1.47036	-1.59289	down
mws0262	C4H6O6	L-Tartaric acid	Organic acids	87-69-4	2.37421e+06	3.00729e+06	4.24916e+06	1.20311e+06	1.09693e+06	1.26752e+06	1.46854	-1.4327	down
pmf0395	C18H34O2	Oleic acid	Lipids	112-80-1	9.58449e+06	8.16736e+06	8.62313e+06	2.62564e+06	2.59481e+06	2.62416e+06	1.5423	-1.7494	down
pme3311	C6H14O12P2	D-Fructose-1,6-biphosphate	Others	488-69-7	121541	100998	124677	295959	306682	209418	1.49134	1.22575	up
pmb0819	C10H8N2	3-Indoleacetonitrile	Alkaloids	771-51-7	618827	731889	637165	2.63562e+06	1.91947e+06	1.67038e+06	1.5214	1.64695	up
pmb1096	C8H7N	Indole	Alkaloids	120-72-9	6.83907e+06	1.05976e+07	9.62165e+06	2.19872e+07	1.72673e+07	1.79627e+07	1.44617	1.08038	up
MWSmce675	C12H16O7	Arbutin	Phenolic acids	497-76-7	437757	557337	570013	158165	152424	236597	1.50411	-1.51616	down
mws1593	C24H42O21	D-Maltotetraose	Others	34612-38-9	311747	369408	291740	732607	931103	502867	1.42182	1.15506	up
MWS04581g	C13H17NO4	Ethyl N-acetyl-L-tyrosinate	Amino acids and derivatives	840-97-1	609871	1.09526e+06	1.16318e+06	404351	273946	427988	1.37816	-1.37448	down
pmb0034	C10H16N2O7	L-α-Glutamyl-L-Glutamic Acid	Amino acids and derivatives	3929-61-1	82240	147415	189264	580467	276637	325704	1.31644	1.49747	up
pmb2406	C25H52NO7P	LysoPC 17:0	Lipids	50930-23-9	3.05179e+06	3.45988e+06	3.3744e+06	6.46211e+06	7.89601e+06	6.51114e+06	1.51826	1.07791	up
Hmtn001288	C9H10O4	Methyl 2,4-dihydroxyphenylacetate	Phenolic acids	67828-42-6	1.11711e+07	1.29356e+07	1.89657e+07	7.00913e+06	6.50138e+06	5.45754e+06	1.41116	-1.18319	down
Zmdp001647	C10H18N2O5	γ-Glutamyl-L-valine	Amino acids and derivatives	-	1.01214e+06	1.65746e+06	1.616e+06	4.43606e+06	3.19196e+06	3.81351e+06	1.45088	1.41671	up
Zmyn000155	C7H14N2O3	N-α-Acetyl-L-ornithine	Amino acids and derivatives	6205-08-9	87544.2	171803	191570	2.00828e+06	1.28396e+06	905901	1.49754	3.21882	up
pmb0962	C10H22N2O4	L-Lysine-Butanoic Acid	Amino acids and derivatives	80407-71-2	28176.7	299279	616712	1.93046e+06	776427	1.25334e+06	1.09499	2.06847	up
Lmjp101403	C10H10O4	3ξ-(1ξ-Hydroxyethyl)-7-hydroxy-1-isobenzofuranone	Others	-	3.20316e+06	4.42155e+06	4.67137e+06	1.19742e+06	1.443e+06	1.68998e+06	1.50448	-1.50563	down
Zmgn000173	C5H10O5	D-Ribose	Others	50-69-1	27433.6	55532.6	31502.5	93497.7	71684.1	73069.1	1.34817	1.05753	up
Wbmn009160	C30H48O5	Cannabifolin C	Terpenoids	-	2.79736e+07	2.03768e+07	3.41152e+07	7.17986e+07	6.81012e+07	6.91294e+07	1.4674	1.34184	up
Zazp002547	C11H12N2O2	cyclo-(Gly-Phe)	Amino acids and derivatives	10125-07-2	1.72851e+06	3.1976e+06	3.02266e+06	8.20014e+06	5.66017e+06	6.15499e+06	1.40534	1.3323	up
pmb2657	C10H18N4O6	Argininosuccinic acid	Organic acids	2387-71-5	23192	32117.3	15358.9	85493.5	78062.4	52059.2	1.44025	1.60933	up
Lmbn002072	C7H12O4	2-Propylsuccinic acid	Organic acids	618-57-5	8287.05	9490.66	16570	65173.5	39608.4	59158.6	1.46116	2.25489	up
Zmgp002869	C21H26O6	5-hydroxy-1,7-bis (4-hydroxy-3-methoxyphenyl)-3-heptanone	Others	-	273787	181615	115988	662611	949456	773218	1.45844	2.06161	up
pma0134	C4H8O4	D-Threose	Others	95-43-2	491761	519991	508087	1.08704e+06	991400	1.21382e+06	1.51715	1.11516	up
Lmyp010262	C15H12O4	2-Acetoxymethyl-anthraquinone	Quinones	-	19530.3	20798.7	38308.5	47754.1	70322.4	102240	1.28078	1.48629	up
pme3009	C6H6O6	Trans-Citridic acid	Organic acids	4023-65-8	70196.4	25095.6	4231.19	70584	156586	64726.2	1.04711	1.55235	up
pme0193	C5H10N2O3	L-Glutamine	Amino acids and derivatives	56-85-9	500175	633454	733711	3.82421e+06	3.95188e+06	2.37252e+06	1.52061	2.44223	up
Lmhp010394	C30H54NO7P	LysoPC 22:4	Lipids	-	44563.4	111362	96544.7	264810	109223	151711	1.09025	1.05825	up
mws4052	C4H7NO2	1-Aminocyclopropane-1-carboxylic acid	Organic acids	22059-21-8	273418	460518	215155	871465	680380	613520	1.37472	1.18999	up
MWSHY0021	C17H14O5	Apigenin-7,4'-dimethyl ether	Flavonoids	5128-44-9	244455	417641	570443	191675	212713	157540	1.25424	-1.13317	down
MWS2070	C10H12O3	Propyl 4-hydroxybenzoate	Phenolic acids	94-13-3	36202	29373.1	26603.5	97981.6	118881	198438	1.45071	2.17165	up
MWSmce467	C9H10O2	4-Allylcatechol	Phenolic acids	1126-61-0	40494	15752.2	10125.5	8387.64	8993.41	10165	1.0048	-1.26872	down
MWS2684	C20H30O3	12-HEPE; 12-Hydroxy-5,8,10,14,17-eicosapentaenoic acid	Lipids	81187-21-5	18530.6	55097.5	59258.5	7461.79	8747.25	6391.46	1.4003	-2.55577	down
MWS201455	C10H19N3O5	Asp-Lys	Amino acids and derivatives	5891-51-0	134422	260335	302549	663197	548290	819856	1.367	1.54257	up
Lmbn007891	C18H34O4	Hydroxy ricinoleic acid	Lipids	-	24131.3	21760.4	22700.6	123211	119783	61211.6	1.5031	2.14893	up
pme2529	C6H12O5	1,5-Anhydro-D-glucitol	Others	154-58-5	19593.5	6372.1	5937.82	9	9	9	1.53588	-10.2065	down
Zmbp002538	C11H12N2O2	1-Methoxy-indole-3-acetamide	Alkaloids	-	1.46018e+06	2.89767e+06	2.586e+06	7.32004e+06	5.51611e+06	5.75905e+06	1.4184	1.42112	up
pmb2654	C19H27NO12	Anthranilate-1-O-Sophoroside	Phenolic acids	-	12129.6	38753	47427	106191	113277	56382.5	1.20275	1.48849	up
pmn001643	C26H34O10	Isolariciresinol-9'-O-rhamnoside (Aviculin)	Lignans and Coumarins	156765-33-2	148619	292555	342778	689235	692979	593045	1.36687	1.33321	up
Zmjn004133	C18H32O4	9S-Hydroperoxy-10E,12Z-octadecadienoic acid	Lipids	5502-91-0	407689	427369	544679	2.05634e+06	2.97612e+06	1.35559e+06	1.48707	2.21098	up
Zmjn001813	C7H12O4	Pimelic acid	Organic acids	111-16-0	39352	81899.2	77690.9	164365	163158	248343	1.35771	1.53338	up
pme3351	C6H11NO3	Allysine(6-Oxo DL-Norleucine)	Amino acids and derivatives	1962-83-0	19554.9	34108.7	98805	137933	101210	186719	1.15987	1.48187	up
mws0005	C10H12N2	Tryptamine	Alkaloids	61-54-1	69431.9	77914.8	59162.4	148164	105389	178193	1.37924	1.06398	up
mws4017	C20H30O	Ferruginol	Terpenoids	514-62-5	196904	184441	159393	592404	349368	703253	1.41885	1.60511	up
Qaxp004683	C22H30O14	Arillatose B	Phenolic acids	137941-45-8	1.20037e+06	909529	575420	2.77676e+06	2.47421e+06	1.66626e+06	1.3968	1.3651	up
Zmgp003208	C20H24O5	5-hydroxy-1-phenyl-7-(3,4-dihydroxy-5-methoxyphenyl)-3-heptanone	Others	-	643475	627625	470446	2.38092e+06	2.01522e+06	1.61999e+06	1.52603	1.78847	up
pme0026	C6H14N2O2	L-Lysine	Amino acids and derivatives	56-87-1	517136	662118	803844	4.40194e+06	4.2957e+06	2.6869e+06	1.52001	2.52125	up
Lskp211491	C30H46O5	2,3,23-Trihydroxyurs-12,19(29)-dien-28-oic acid	Terpenoids	-	556165	767523	724800	1.7032e+06	1.71909e+06	1.70822e+06	1.51142	1.32455	up
pmn001606	C20H38O2	Eicosenoic acid	Lipids	26764-41-0	2.43912e+07	1.50984e+07	2.08621e+07	6.44591e+07	3.46238e+07	2.85432e+07	1.2504	1.08046	up
pma0149	C15H16O9	Sinapoyl malate	Phenolic acids	92344-58-6	75343.8	139498	118088	62515	47391.3	51469.2	1.33036	-1.0448	down
HJN003	C17H22O10	1-O-Sinapoyl-β-D-glucose	Phenolic acids	-	1.04934e+06	2.25716e+06	1.76483e+06	4.76835e+06	2.49193e+06	5.0007e+06	1.24376	1.27364	up
Lmbn001034	C6H12O4	2,3-Dihydroxy-3-methylpentanoic acid	Organic acids	562-43-6	18619.3	19180.9	14098	123968	152943	110054	1.54105	2.89845	up
Zmxn110201	C14H20O9	2,6-Dimethoxy-4-hydroxyphenol-1-O-ß-D-glucopyranoside	Others	-	82273.2	98737.5	85068.9	36322.1	44900.8	50749.1	1.49658	-1.01163	down
Lmhp008924	C27H50NO7P	LysoPC 19:3	Lipids	-	102890	230150	227178	632704	448618	517863	1.37696	1.51328	up
pmb1574	C18H28O2	9,12-Octadecadien-6-Ynoic Acid	Lipids	61481-29-6	49803.8	37935.6	50715.9	157180	280581	131374	1.4653	2.03935	up
Lmgn000160	C4H8N2O3	3-Ureidopropionic Acid	Organic acids	462-88-4	154292	140478	116880	1.1232e+06	976520	579690	1.5297	2.70243	up
pmb0803	C24H29NO11	Pyridoxine-5'-O-(6''-feruloyl)glucoside	Others	-	545294	1.06974e+06	1.85488e+06	3.12755e+06	2.57221e+06	2.39761e+06	1.23234	1.22255	up
MWS201408	C9H14N2O7	Asp-Glu	Amino acids and derivatives	6157-06-8	138763	140137	132916	345108	256644	294734	1.51777	1.12228	up
pmp001288	C28H32O14	Acacetin-7-O-rutinoside (Linarin)	Flavonoids	480-36-4	34978	60763.9	42177.3	128883	117396	100644	1.46642	1.33079	up
MWSmce466	C8H8O2	4-Hydroxyacetophenone	Phenolic acids	99-93-4	985737	1.13713e+06	1.43012e+06	419480	438973	607221	1.48727	-1.27747	down
Hmmp001310	C11H9NO2	3-Indoleacrylic acid	Alkaloids	1204-06-4	875182	1.51044e+06	1.42516e+06	4.15361e+06	2.7934e+06	2.98565e+06	1.4298	1.38209	up
MWSHY0049	C16H14O6	Hesperetin	Flavonoids	520-33-2	829739	1.68194e+06	1.61902e+06	308455	383327	299420	1.45951	-2.05914	down
Wbtn006721	C15H10O6	6,8-dihydroxy-3-methyl-9-oxoxanthene-1-carboxylic acid	Others	-	189538	22250.9	41138.8	6648.27	9502.82	8842.42	1.28669	-3.3391	down
HJAP064	C25H24O15	Isorhamnetin-3-O-(6''-malonyl)glucoside	Flavonoids	-	74356	106787	114870	337194	325274	452014	1.48143	1.91264	up
mws0874	C10H14N5O7P	3'-Adenylic Acid	Nucleotides and derivatives	84-21-9	18387.4	33776.6	30939.4	71278.5	68962.3	50726.2	1.39721	1.20034	up
MWSmce713	C9H12O2	3-(4-Hydroxyphenyl)-1-propanol	Phenolic acids	10210-17-0	130076	56213.3	62797.4	24433.5	32779.5	53468.2	1.2015	-1.17024	down
HJN012	C20H26O7	4,7,9,9'-Tetrahydroxy-3,3'-dimethoxy-8-O-4'-neolignan	Phenolic acids	-	39338.9	60961.9	79383.5	132570	93559	272960	1.16758	1.47383	up
pmb0864	C19H40NO7P	LysoPE 14:0	Lipids	-	420702	1.62983e+06	717085	1.9055e+06	1.36393e+06	2.49986e+06	1.08073	1.05975	up
mws1565	C17H24O10	Geniposide	Terpenoids	24512-63-8	148388	270881	241155	638218	535250	509703	1.44199	1.34972	up
Zjmp102708	C30H46O5	3-Hydroxyolean-12-ene-28,29-dioic acid (Serratagenic Acid)	Terpenoids	6488-64-8	2.04813e+06	1.72652e+06	1.48844e+06	3.45554e+06	4.40993e+06	4.67279e+06	1.46831	1.25236	up
mws3141	C12H14N2O3	5-Methoxy-DL-tryptophan	Amino acids and derivatives	28052-84-8	116730	175307	104481	360757	471309	338790	1.47808	1.56211	up
Wafn001957	C15H16O11	2-O-Caffeoylglucaric Acid	Phenolic acids	-	338402	709672	681552	110733	197401	178640	1.41378	-1.82914	down
Lmhp112042	C21H38O4	1-Linoleoylglycerol	Lipids	2277-28-3	30544.7	19932.4	21885.4	85873.8	87696.9	113062	1.497	1.98589	up
mws0263	C5H7NO3	5-Oxo-L-Proline	Amino acids and derivatives	98-79-3	6255.33	26368.5	28095.9	84695.1	46803.7	58619.6	1.21192	1.64666	up
pmn001338	C21H18O11	Rhein-8-O-glucoside	Quinones	34298-86-7	1.10089e+06	1.86358e+06	1.51224e+06	601265	565451	863601	1.40233	-1.14073	down
Wmzn000227	C6H10O4	2,2-Dimethylsuccinic acid	Organic acids	597-43-3	39139.6	55522.4	66350.3	416393	445434	210478	1.49936	2.73547	up
MWStz054	C9H13NO	2,4,6,6-Tetramethyl-3(6H)-pyridinone	Alkaloids	203524-64-5	107024	117003	131192	47134.8	47189.2	58900.3	1.52961	-1.21306	down
Hmqp005411	C18H32O3	9-Oxo-12Z-Octadecenoic acid	Lipids	112543-32-5	49435.9	42398.5	41948	140239	149392	41314.2	1.10928	1.3067	up
Hmqp005455	C18H32O3	15(R)-Hydroxylinoleic Acid	Lipids	177931-23-6	49435.9	42398.5	41948	140239	149392	41314.2	1.10928	1.3067	up
Ymjm000116	C14H18O8	6-O-Acetylarbutin	Phenolic acids	10338-88-2	1.24435e+06	1.55302e+06	2.58209e+06	870339	680180	534568	1.33414	-1.36735	down
MWSmce700	C6H8N2	2-Ethylpyrazine	Alkaloids	13925-00-3	9	9	9	98598.5	65565.4	72384.8	1.54785	13.0969	up
Lchp000221	C11H10O4	(Z)-3-Ethylidene-7-hydroxy-6-methoxyphthalide	Others	-	1.07287e+07	1.27475e+07	1.20057e+07	2.68471e+07	2.0516e+07	2.71733e+07	1.48186	1.07086	up
Rfmb26201	C30H38O14	Syringaresinol-4'-O-(6''-acetyl)glucoside	Lignans and Coumarins	-	1.7103e+06	326139	314118	6.32339e+06	1.93142e+06	3.51398e+06	1.27345	2.32389	up
Lmhp008885	C20H42NO7P	LysoPE 15:0(2n isomer)	Lipids	-	892726	1.91126e+06	667263	4.68294e+06	3.17022e+06	5.53511e+06	1.38554	1.94744	up
Zmhn001446	C28H36O13	Syringaresinol-4'-O-glucoside	Lignans and Coumarins	7374-79-0	1.41796e+06	520346	475786	1.18782e+06	3.97511e+06	2.60671e+06	1.16862	1.68637	up
Lmhp010162	C22H46NO7P	LysoPE 17:0	Lipids	-	121532	73370.2	83983.6	730979	344863	326153	1.46931	2.32974	up
Qagp003587	C13H18N2O	N-Monocinnamoylputrescine	Alkaloids	-	1.12563e+06	756436	362000	1.74841e+06	1.83061e+06	1.32644e+06	1.24461	1.12827	up
CAS: Chemical Abstracts Service. PC: P. vulgaris chimera. P: P. vulgaris.

## Sheet: Table S4
Table S4: The differentially accumulated metabolites (DAMs) related to haustoria formation.
Index	Formula	Compounds	Category	CAS	TH1	TH2	TH3	THC1	THC2	THC3	TH_vs_THC_Type	P1	P2	P3	PC1	PC2	PC3	P_vs_PC_Type	cpd_ID	kegg_map
Zmdp001663	C10H18N2O5S	γ-glutamylmethionine	Amino acids and derivatives	17663-87-5	1.00504e+06	5.08122e+06	2.14404e+06	360768	498487	1.02712e+06	down	364573	99316	575068	1.63711e+06	1.06915e+06	1.29521e+06	up	-	-
Zbdn001947	C13H18O8	Isotachioside	Phenolic acids	31427-08-4	329265	702498	1.08205e+06	56479	69886.6	91196.9	down	1.64671e+06	1.80967e+06	1.70205e+06	779012	769994	933409	down	-	-
pmb0818	C11H11NO3	Methoxyindoleacetic acid	Alkaloids	3471-31-6	6.42897e+06	4.55816e+06	3.4273e+06	2.04053e+06	1.59237e+06	1.80649e+06	down	2.46646e+06	4.1999e+06	4.28663e+06	1.01766e+07	7.14228e+06	7.99654e+06	up	C05660	ko00380
Hmhn007023	C30H48O6	2,3,19-Trihydroxyurs-12-en-28-oic acid	Terpenoids	-	10899.4	12158.1	43526.8	44285.1	84863.3	64467.3	up	2.59919e+06	2.60644e+06	2.81424e+06	8.23689e+06	7.2411e+06	6.45594e+06	up	-	-
Lmsn010896	C30H46O6	23-Formyl-2,3,19-trihydroxyurs-12-en-28-oic acid (Pinfaensic acid)	Terpenoids	-	2744.32	1666.82	3171.28	4581.62	8884.7	18348.8	up	1.20628e+06	402910	504983	4.49924e+06	3.39275e+06	1.58445e+06	up	-	-
mws0236	C2H7NO3S	2-Aminoethanesulfonic acid	Organic acids	107-35-7	49352.6	84569.3	65019.9	28726.3	29822.9	28296.7	down	33434.1	35672.3	20696.7	136607	128042	63803.3	up	C00245	ko00430,ko00920,ko01100,ko02010
pme2244	C11H11NO2	3-Indolepropionic acid	Alkaloids	830-96-6	790405	571134	358912	201265	170077	193659	down	268196	425594	480640	1.3003e+06	881056	924740	up	-	-
Lmqp000427	C6H11NO3	N-Methyl-Trans-4-Hydroxy-L-Proline	Amino acids and derivatives	4252-82-8	830035	1.54349e+06	800160	648424	210410	197025	down	426568	837708	2.45332e+06	340196	301816	429466	down	-	-
MWS5164	C8H18N4O2	N,N'-Dimethylarginine;SDMA	Amino acids and derivatives	30344-00-4	1.31737e+06	1.01458e+06	1.19531e+06	4.67335e+06	4.67808e+06	5.44534e+06	up	286901	632079	602833	1.54565e+06	1.06415e+06	1.28291e+06	up	-	-
Zmjp000182	C7H16N4O2	N-Monomethyl-L-arginine	Amino acids and derivatives	17035-90-4	747034	494677	542420	1.77213e+06	1.17981e+06	1.58281e+06	up	451858	1.56339e+06	1.35172e+06	4.35976e+06	2.392e+06	3.62757e+06	up	C03884	-
mws1200	C10H10O3	p-Coumaric acid methyl ester	Phenolic acids	19367-38-5	142927	103230	34905.3	23237	22964.6	25274.6	down	60032.5	118162	196518	418015	411466	1.03264e+06	up	-	-
pmn001423	C19H30O8	Roseoside	Others	54835-70-0	317045	306404	173082	41450.6	50430	65780.2	down	3.43424e+06	8.05656e+06	6.24047e+06	1.69915e+07	8.86829e+06	1.70736e+07	up	-	-
MWSmce709	C9H7N	Isoquinoline	Alkaloids	119-65-3	3.10443e+06	2.3116e+06	1.86318e+06	1.04896e+06	713442	938315	down	1.04653e+06	1.48305e+06	1.56603e+06	4.40818e+06	3.11347e+06	3.08856e+06	up	C06323	-
Zbdn002066	C13H18O8	Tachioside	Phenolic acids	109194-60-7	175711	741823	1.01431e+06	66507.6	57294.8	71790.3	down	1.81318e+06	1.94566e+06	1.95384e+06	838006	845083	1.00466e+06	down	-	-
Lmrj002087	C10H18N2O5	L-Isoleucyl-L-Aspartate	Amino acids and derivatives	-	2.28659e+06	1.94558e+06	2.62352e+06	8.89541e+06	9.65685e+06	7.57174e+06	up	393002	1.07832e+06	481912	2.5958e+06	2.50158e+06	3.10476e+06	up	-	-
Zaln004057	C16H16O8	4-caffeoylshikimic acid	Phenolic acids	-	137268	564326	191810	121952	42911.3	50074.1	down	264335	688280	705374	1.77601e+06	1.63082e+06	1.21066e+06	up	-	-
mws0254	C6H9N3O2	L-Histidine	Amino acids and derivatives	71-00-1	1.23828e+07	1.74601e+07	1.11182e+07	5.88955e+06	4.28043e+06	6.65271e+06	down	1.23613e+06	2.2706e+06	1.57131e+06	9.49321e+06	4.38861e+06	7.37187e+06	up	C00135	ko00340,ko00410,ko00470,ko00970,ko01100,ko01110,ko01230,ko02010
mws2118	C21H24O10	Phloretin-2'-O-glucoside (Phlorizin)	Flavonoids	60-81-1	20398.5	31079.6	22666.3	9	9	9	down	14609.9	10180.1	13167.1	871370	22222.3	35453.6	up	C01604	ko00941,ko01110
mws0629	C13H16N2O5	L-Aspartyl-L-Phenylalanine	Amino acids and derivatives	13433-09-5	543773	759956	2.06063e+06	6.23659e+06	5.58638e+06	4.27365e+06	up	279537	447994	238917	2.52896e+06	2.75838e+06	2.53166e+06	up	-	-
Jmzn006005	C10H10O3	3,4-Methylenedioxy cinnamyl alcohol	Lignans and Coumarins	58095-76-4	168606	123545	47074.7	31585.1	33371.3	36835.7	down	84885.6	135302	239670	551502	508387	1.36662e+06	up	-	-
MWSslk208	C20H30O2	Kaurenoic Acid	Terpenoids	6730-83-2	407839	71902.9	55505.3	9	9	9	down	280973	285727	242510	1.08875e+06	1.03129e+06	1.0944e+06	up	C11874	ko00904,ko01100,ko01110
mws0282	C11H12N2O2	L-Tryptophan	Amino acids and derivatives	73-22-3	3.24971e+07	22425286	1.6198e+07	9.88064e+06	6.99429e+06	8.91269e+06	down	5.91783e+06	9.62754e+06	1.05732e+07	2.71507e+07	2.03628e+07	2.03759e+07	up	C00078	ko00260,ko00380,ko00400,ko00901,ko00966,ko00970,ko01100,ko01110,ko01210,ko01230,ko01240
Lmxn010778	C21H28O5	Candelabrone 12-methyl ether	Terpenoids	-	4637.48	4895.54	239367	266625	774558	139212	up	1.12682e+07	7.65526e+06	8.736e+06	4.71891e+07	3.79251e+07	4.14575e+07	up	-	-
Lmsn002247	C13H16O8	1-O-Salicyloyl-β-D-glucose	Phenolic acids	60517-74-0	175524	590787	825165	107947	126580	109649	down	818688	1.91066e+06	1.84893e+06	557231	617304	766094	down	-	-
Lhdp102526	C30H48O4	19-Hydroxyursolic acid	Terpenoids	-	7412.08	6730.81	6083.58	17321.6	24084.9	19491.7	up	181210	208879	273975	518892	651852	606598	up	-	-
pmb2319	C23H48NO7P	LysoPC 15:0	Lipids	108273-89-8	1.14616e+06	2.6179e+06	1.74864e+06	547582	789175	708706	down	481037	474910	527222	757893	1.31723e+06	954810	up	-	-
pmb3142	C13H16O8	Salicylic acid-2-O-glucoside	Phenolic acids	10366-91-3	506435	2.2439e+06	3.2575e+06	245012	242585	227590	down	4.45534e+06	8.32757e+06	8.5211e+06	2.2282e+06	2.47975e+06	3.39754e+06	down	-	-
pme3388	C7H16N4O2	Homoarginine	Amino acids and derivatives	156-86-5	302964	265599	209628	597185	482079	595733	up	198464	555368	491183	1.37796e+06	825979	1.24324e+06	up	C01924	-
mws1333	C12H22O11	Melibiose	Others	585-99-9	1.10226e+06	228823	154308	124808	62450.1	143522	down	1.81363e+06	1.74325e+06	1.88111e+06	4.35294e+06	4.74487e+06	2.60966e+06	up	C05402	ko00052,ko01100,ko02010
Hmgp002327	C11H9O2N	3-amino-2-naphthoic acid	Alkaloids	-	3.06658e+06	2.31804e+06	1.41773e+06	853237	619720	715179	down	945800	1.73392e+06	1.45362e+06	4.22021e+06	2.80001e+06	3.07359e+06	up	-	-
NK10251888	C8H18N4O2	NG,NG-Dimethyl-L-arginine	Amino acids and derivatives	30315-93-6	1.32993e+06	1.02224e+06	1.14228e+06	4.76516e+06	4.52031e+06	5.51054e+06	up	286493	480665	587813	1.73926e+06	934983	1.25382e+06	up	C03626	-
pmb2507	C5H11O7P	2-Deoxyribose-1-phosphate	Nucleotides and derivatives	17210-42-3	155079	266123	263181	562044	617236	382296	up	78184	262239	208913	479169	652277	463193	up	C00672	ko00030,ko00240,ko01100
Hmbn002692	C22H30O14	6'-O-Feruloyl-D-sucrose	Phenolic acids	118230-77-6	207862	423062	814955	787100	1.05869e+06	1.3005e+06	up	534912	584532	428855	1.66677e+06	1.11333e+06	903852	up	-	-
pme1654	C12H18O3	Jasmonic acid	Organic acids	77026-92-7	29033	25337.1	17922.4	92142.8	201598	226925	up	303691	297473	175259	326643	990230	481245	up	C08491	ko00592,ko01100,ko01110,ko04075
Ymjm000152	C12H16O7	p-Hydroxypheny-β-D-allopyranoside	Phenolic acids	-	11653.8	34673.5	49837.9	1856.85	8751.76	2477.31	down	406683	561130	563998	120145	149570	238090	down	-	-
mws0262	C4H6O6	L-Tartaric acid	Organic acids	87-69-4	1.75415e+06	125108	211116	1.33902e+06	1.94747e+06	1.87481e+06	up	2.37421e+06	3.00729e+06	4.24916e+06	1.20311e+06	1.09693e+06	1.26752e+06	down	C00898	ko00630,ko01100
pmf0395	C18H34O2	Oleic acid	Lipids	112-80-1	37484.8	36628.3	151571	20562.3	16554	34674.3	down	9.58449e+06	8.16736e+06	8.62313e+06	2.62564e+06	2.59481e+06	2.62416e+06	down	C00712	ko00061,ko00073,ko01040
pmb0819	C10H8N2	3-Indoleacetonitrile	Alkaloids	771-51-7	1.54101e+06	1.48351e+06	1.05692e+06	780813	494593	693704	down	618827	731889	637165	2.63562e+06	1.91947e+06	1.67038e+06	up	C02938	ko00380,ko01100
pmb1096	C8H7N	Indole	Alkaloids	120-72-9	1.71929e+07	1.39691e+07	1.17107e+07	9.67975e+06	1.46697e+06	2.8419e+06	down	6.83907e+06	1.05976e+07	9.62165e+06	2.19872e+07	1.72673e+07	1.79627e+07	up	C00463	ko00380,ko00400,ko01100,ko01110
MWSmce675	C12H16O7	Arbutin	Phenolic acids	497-76-7	12771.4	35004.9	43467	2716.38	4223.84	3143.99	down	437757	557337	570013	158165	152424	236597	down	C06186	ko00010
pmb0962	C10H22N2O4	L-Lysine-Butanoic Acid	Amino acids and derivatives	80407-71-2	430248	2.45802e+06	50809.2	56229.1	15064.8	7208.18	down	28176.7	299279	616712	1.93046e+06	776427	1.25334e+06	up	-	-
Zazp002547	C11H12N2O2	cyclo-(Gly-Phe)	Amino acids and derivatives	10125-07-2	5.633e+06	4.50573e+06	2.76186e+06	1.55119e+06	1.04062e+06	1.46819e+06	down	1.72851e+06	3.1976e+06	3.02266e+06	8.20014e+06	5.66017e+06	6.15499e+06	up	-	-
Lmyp010262	C15H12O4	2-Acetoxymethyl-anthraquinone	Quinones	-	4.80988e+06	3.98772e+06	4.78012e+06	1.24534e+07	1.20797e+07	1.09092e+07	up	19530.3	20798.7	38308.5	47754.1	70322.4	102240	up	-	-
pme3009	C6H6O6	Trans-Citridic acid	Organic acids	4023-65-8	316510	168436	192154	135124	65168.5	94768.8	down	70196.4	25095.6	4231.19	70584	156586	64726.2	up	C02341	ko00660,ko01100
MWS2070	C10H12O3	Propyl 4-hydroxybenzoate	Phenolic acids	94-13-3	42695.4	41229.9	44100.9	248074	245296	149649	up	36202	29373.1	26603.5	97981.6	118881	198438	up	-	-
Zmbp002538	C11H12N2O2	1-Methoxy-indole-3-acetamide	Alkaloids	-	5.36556e+06	4.04194e+06	2.46568e+06	1.43172e+06	928626	1.15936e+06	down	1.46018e+06	2.89767e+06	2.586e+06	7.32004e+06	5.51611e+06	5.75905e+06	up	-	-
mws0005	C10H12N2	Tryptamine	Alkaloids	61-54-1	174988	75845.6	64689.1	42399.2	14061.8	23319.1	down	69431.9	77914.8	59162.4	148164	105389	178193	up	C00398	ko00380,ko00901,ko01100,ko01110
Zmgp003208	C20H24O5	5-hydroxy-1-phenyl-7-(3,4-dihydroxy-5-methoxyphenyl)-3-heptanone	Others	-	24600.2	19734.2	28267.4	160490	236560	310978	up	643475	627625	470446	2.38092e+06	2.01522e+06	1.61999e+06	up	-	-
pma0149	C15H16O9	Sinapoyl malate	Phenolic acids	92344-58-6	667629	373782	245630	119331	117438	193039	down	75343.8	139498	118088	62515	47391.3	51469.2	down	C02887	ko00940,ko01110
HJN003	C17H22O10	1-O-Sinapoyl-β-D-glucose	Phenolic acids	-	233838	226506	220021	44954.1	62395.3	41352.5	down	1.04934e+06	2.25716e+06	1.76483e+06	4.76835e+06	2.49193e+06	5.0007e+06	up	C01175	ko00940,ko01110
Zmxn110201	C14H20O9	2,6-Dimethoxy-4-hydroxyphenol-1-O-ß-D-glucopyranoside	Others	-	2421.85	15183.2	15410.5	9	9	9	down	82273.2	98737.5	85068.9	36322.1	44900.8	50749.1	down	-	-
pmp001288	C28H32O14	Acacetin-7-O-rutinoside (Linarin)	Flavonoids	480-36-4	60511.7	47263.7	36666.2	9223.22	15428	18663.5	down	34978	60763.9	42177.3	128883	117396	100644	up	-	-
Hmmp001310	C11H9NO2	3-Indoleacrylic acid	Alkaloids	1204-06-4	2.97891e+06	2.17939e+06	1.44268e+06	801838	533555	731217	down	875182	1.51044e+06	1.42516e+06	4.15361e+06	2.7934e+06	2.98565e+06	up	C21283	-
Wafn001957	C15H16O11	2-O-Caffeoylglucaric Acid	Phenolic acids	-	110088	255209	215368	44020.9	46965.1	118358	down	338402	709672	681552	110733	197401	178640	down	C03062	-
Wmzn000227	C6H10O4	2,2-Dimethylsuccinic acid	Organic acids	597-43-3	15280.3	30836.7	29739.3	48591.9	73062.5	40733.3	up	39139.6	55522.4	66350.3	416393	445434	210478	up	-	-
Zmhn001446	C28H36O13	Syringaresinol-4'-O-glucoside	Lignans and Coumarins	7374-79-0	659835	539941	294515	176603	91707.1	176881	down	1.41796e+06	520346	475786	1.18782e+06	3.97511e+06	2.60671e+06	up	C10890	-
CAS: Chemical Abstracts Service. TH: T. chinense. THC: T. chinense chimera. PC: P. vulgaris chimera. P: P. vulgaris.

## Sheet: Table S5
Table S5: The differentially expressed genes (DEGs) in the T. chinense and T. chinense chimera.
Unigene-ID	TH1_fpkm	TH2_fpkm	TH3_fpkm	THC1_fpkm	THC2_fpkm	THC3_fpkm	log2FoldChange	padj	KEGG pathway	Swissprot
Cluster-32271.6	32.45	28.6	41.98	1378.51	1515.19	1562	5.5465	8.4366e-142	--	ERLL2_ARATH RecName: Full=pEARLI1-like lipid transfer protein 2; Flags: Precursor;
Cluster-18011.13	106.42	122.7	121.88	1.79	1.54	2.51	-8.08127	9.66556e-122	ko00053: Ascorbate and aldarate metabolism; ko00480: Glutathione metabolism; ko01100: Metabolic pathways	APX1_PEA RecName: Full=L-ascorbate peroxidase, cytosolic; Short=AP; EC=1.11.1.11; AltName: Full=PsAPx01;
Cluster-29676.2	568.26	776.78	713.84	0.86	1.36	1.53	-9.02361	5.56642e-110	--	--
Cluster-27969.0	16.69	12.79	19.08	177.57	169.04	174.97	3.56493	8.68956e-84	ko04075: Plant hormone signal transduction	SAU32_ARATH RecName: Full=Auxin-responsive protein SAUR32 {ECO:0000305}; AltName: Full=Protein ABOLISHED APICAL HOOK MAINTENANCE 1 {ECO:0000303|Ref.6}; AltName: Full=Protein SMALL AUXIN UP RNA 32 {ECO:0000303|PubMed:12036261};
Cluster-5871.7	47.4	39.27	56.77	393.69	554.07	402.17	3.64273	1.27097e-70	--	PESC_ORYSJ RecName: Full=Pescadillo homolog {ECO:0000255|HAMAP-Rule:MF_03028};
Cluster-31483.3	3.26	3.67	3.58	74.96	62.92	88.15	4.57975	1.86341e-55	--	--
Cluster-29551.0	0.09	0	0.13	56.85	80.06	85.22	10.285	6.01981e-52	--	--
Cluster-6713.5	1.2	0.43	0.92	52.26	74.61	62.13	6.41404	4.85581e-49	ko04016: MAPK signaling pathway - plant	FAMA_ARATH RecName: Full=Transcription factor FAMA; AltName: Full=Basic helix-loop-helix protein 97; Short=AtbHLH97; Short=bHLH 97; AltName: Full=Transcription factor EN 14; AltName: Full=bHLH transcription factor bHLH097;
Cluster-15977.1	141.04	141.08	184.54	15.46	13.03	12.79	-3.37554	5.88472e-49	--	HSP7H_ARATH RecName: Full=Heat shock 70 kDa protein 8; AltName: Full=Heat shock protein 70-8; Short=AtHsp70-8; AltName: Full=Heat-shock protein 70T-2;
Cluster-29041.3	1.5	1.1	1.12	23.29	33.25	23.03	4.5659	3.50998e-45	--	PMT3_ARATH RecName: Full=Probable methyltransferase PMT3; EC=2.1.1.-;
Cluster-16591.3	6.54	5.97	6.84	63.83	76.23	76.98	3.70751	5.74024e-45	--	--
Cluster-16015.3	450.97	358.63	489.31	2690.34	3309.69	3447.79	3.00555	5.83424e-45	ko00270: Cysteine and methionine metabolism; ko00999: Biosynthesis of various plant secondary metabolites; ko01100: Metabolic pathways; ko01110: Biosynthesis of secondary metabolites; ko01230: Biosynthesis of amino acids; ko01240: Biosynthesis of cofactors	METK5_VITVI RecName: Full=S-adenosylmethionine synthase 5; Short=AdoMet synthase 5; EC=2.5.1.6 {ECO:0000250|UniProtKB:Q96551}; AltName: Full=Methionine adenosyltransferase 5; Short=MAT 5;
Cluster-26905.9	139.94	232.1	168.89	0.63	0.93	0.32	-8.08952	6.9341e-45	ko04626: Plant-pathogen interaction	CDPKW_ARATH RecName: Full=Calcium-dependent protein kinase 32 {ECO:0000303|Ref.5}; EC=2.7.11.1 {ECO:0000305};
Cluster-29141.2	556.56	381.79	493.64	52.48	56.86	66.05	-2.84187	1.54329e-44	ko00900: Terpenoid backbone biosynthesis; ko01100: Metabolic pathways; ko01110: Biosynthesis of secondary metabolites	HMDH_CAMAC RecName: Full=3-hydroxy-3-methylglutaryl-coenzyme A reductase; Short=HMG-CoA reductase; EC=1.1.1.34;
Cluster-22735.4	19.86	21.11	21.23	1.22	0.9	0.99	-4.2081	3.92247e-43	ko00190: Oxidative phosphorylation; ko01100: Metabolic pathways	NDA1_SOLTU RecName: Full=Internal alternative NAD(P)H-ubiquinone oxidoreductase A1, mitochondrial; EC=1.6.5.9 {ECO:0000269|PubMed:10571867}; AltName: Full=Internal alternative NADH dehydrogenase NDA1; AltName: Full=Internal non-phosphorylating NAD(P)H dehydrogenase 1; Short=StNDI1; AltName: Full=NADH:ubiquinone reductase (non-electrogenic) NDA1; Flags: Precursor;
Cluster-8102.5	44.88	39.56	40.74	208.97	196.75	182.97	2.34577	7.7807e-43	--	--
Cluster-31245.0	44.04	52.47	32.04	0.68	0.69	0.68	-5.90513	6.7725e-42	--	NAC46_ARATH RecName: Full=NAC domain-containing protein 46 {ECO:0000303|PubMed:15029955}; Short=ANAC046 {ECO:0000303|PubMed:15029955};
Cluster-25441.0	167.07	115.23	345.24	1.64	1.84	2.03	-6.66789	9.02286e-42	--	--
Cluster-22232.1	3.67	3.88	5.21	37.11	37.46	38.89	3.33829	5.84574e-41	ko00380: Tryptophan metabolism; ko00940: Phenylpropanoid biosynthesis; ko01100: Metabolic pathways; ko01110: Biosynthesis of secondary metabolites	COMT1_CAPAN RecName: Full=Caffeic acid 3-O-methyltransferase; Short=CAOMT; Short=COMT; EC=2.1.1.68; AltName: Full=S-adenosysl-L-methionine:caffeic acid 3-O-methyltransferase;
Cluster-29209.2	15.33	14.06	16.29	50.92	51.1	52.46	1.88448	6.05236e-41	--	EIF3A_ARATH RecName: Full=Eukaryotic translation initiation factor 3 subunit A {ECO:0000255|HAMAP-Rule:MF_03000}; Short=eIF3a {ECO:0000255|HAMAP-Rule:MF_03000}; AltName: Full=Eukaryotic translation initiation factor 3 large subunit; AltName: Full=Eukaryotic translation initiation factor 3 subunit 10 {ECO:0000255|HAMAP-Rule:MF_03000}; AltName: Full=eIF-3-theta {ECO:0000255|HAMAP-Rule:MF_03000}; Al…
Cluster-18144.5	12.71	10.06	13.92	60.01	67.43	68.75	2.56614	6.381e-41	ko03040: Spliceosome	SRS31_ARATH RecName: Full=Serine/arginine-rich splicing factor RS31; Short=At-RSp31; Short=AtRS31;
Cluster-25180.4	15.65	12.76	14.55	95	84.12	73.4	2.69185	8.08011e-41	--	--
Cluster-26714.1	228.61	196.78	169.91	15.6	15.56	18.85	-3.42485	3.50168e-39	--	BAG6_ARATH RecName: Full=BAG family molecular chaperone regulator 6 {ECO:0000303|Ref.3}; AltName: Full=Bcl-2-associated athanogene 6 {ECO:0000303|Ref.3}; AltName: Full=CaM-binding protein 1 {ECO:0000303|PubMed:16003391}; Contains: RecName: Full=Cleaved BAG6 {ECO:0000303|PubMed:26739014};
Cluster-27946.0	72.27	64.88	94.67	349.13	263.65	352.93	2.11481	8.64743e-39	ko00400: Phenylalanine, tyrosine and tryptophan biosynthesis; ko01100: Metabolic pathways; ko01110: Biosynthesis of secondary metabolites; ko01230: Biosynthesis of amino acids	AROC_ARATH RecName: Full=Chorismate synthase, chloroplastic; EC=4.2.3.5; AltName: Full=5-enolpyruvylshikimate-3-phosphate phospholyase; AltName: Full=Protein EMBRYO DEFECTIVE 1144; Flags: Precursor;
Cluster-8849.9	11.19	10.44	11.24	0.62	0.83	0.51	-3.94553	3.02771e-38	ko04075: Plant hormone signal transduction	SCL14_ARATH RecName: Full=Scarecrow-like protein 14; Short=AtSCL14; AltName: Full=GRAS family protein 2; Short=AtGRAS-2;
Cluster-31074.1	392.18	512.38	557.99	0	0	0	-16.656	9.55638e-38	--	--
Cluster-27308.4	3.32	2.47	4.55	93.79	58.81	70.6	4.58074	1.75757e-37	--	SAP3_ARATH RecName: Full=Zinc finger A20 and AN1 domain-containing stress-associated protein 3; Short=AtSAP3;
Cluster-27437.1	314.57	285.3	379.13	0	0	0.3	-11.8779	2.60768e-37	--	--
Cluster-30496.0	88.21	60.5	97.28	486.06	660.87	614.74	2.73092	3.12289e-37	ko00670: One carbon pool by folate; ko01100: Metabolic pathways; ko01200: Carbon metabolism	MTHR2_ARATH RecName: Full=Methylenetetrahydrofolate reductase 2; Short=AtMTHFR2; EC=1.5.1.20;
Cluster-25655.1	36.07	98.39	56.75	0.07	0.16	0.04	-9.45897	4.40018e-37	--	PP280_ARATH RecName: Full=Pentatricopeptide repeat-containing protein At3g53360, mitochondrial; Flags: Precursor;
Cluster-28074.3	5.29	5.78	4.41	53.95	59.27	59.7	3.60307	5.40977e-37	ko04141: Protein processing in endoplasmic reticulum	IF2AH_ARATH RecName: Full=Eukaryotic translation initiation factor 2 subunit alpha homolog {ECO:0000305};
Cluster-32271.5	64.06	53.36	81.39	2090.82	5057.24	4275.9	5.99456	1.03441e-36	--	ERLL2_ARATH RecName: Full=pEARLI1-like lipid transfer protein 2; Flags: Precursor;
Cluster-29130.0	104.42	192.3	127.45	2.22	2.39	2.88	-5.74667	1.57141e-36	--	TIP21_ARATH RecName: Full=Aquaporin TIP2-1; AltName: Full=Delta-tonoplast intrinsic protein; Short=Delta-TIP; AltName: Full=Tonoplast intrinsic protein 2-1; Short=AtTIP2;1; Contains: RecName: Full=Aquaporin TIP2-1, N-terminally processed;
Cluster-29376.13	40.83	33.6	49.5	5.54	5.59	6.07	-2.70902	2.77237e-36	--	NUD17_ARATH RecName: Full=Nudix hydrolase 17, mitochondrial; Short=AtNUDT17; EC=3.6.1.-; Flags: Precursor;
Cluster-18009.0	95.98	79.59	126.42	1.56	1.98	0.67	-6.01898	5.39701e-36	--	--
Cluster-28579.0	71.68	58.71	91.87	0	0.08	0	-11.8672	6.66849e-36	--	TMN7_ARATH RecName: Full=Transmembrane 9 superfamily member 7 {ECO:0000305}; AltName: Full=Endomembrane protein 5 {ECO:0000303|PubMed:22570441}; AltName: Full=Transmembrane nine protein 7 {ECO:0000303|PubMed:20681974}; Short=AtTMN7 {ECO:0000303|PubMed:20681974}; Flags: Precursor;
Cluster-10793.1	1725.69	2820.75	1606.18	0.16	0.46	245.27	-9.56184	2.00889e-35	--	DRM1_PEA RecName: Full=Dormancy-associated protein 1 {ECO:0000303|PubMed:9684359}; Short=PsDRM1 {ECO:0000303|PubMed:9684359};
Cluster-17385.19	14.99	8.02	15.28	0.11	0.14	0.23	-6.21526	2.3911e-35	ko00280: Valine, leucine and isoleucine degradation; ko01100: Metabolic pathways	MCCB_ARATH RecName: Full=Methylcrotonoyl-CoA carboxylase beta chain, mitochondrial; Short=MCCase subunit beta; EC=6.4.1.4; AltName: Full=3-methylcrotonyl-CoA carboxylase 2; AltName: Full=3-methylcrotonyl-CoA:carbon dioxide ligase subunit beta; Flags: Precursor;
Cluster-25327.4	5.06	2.67	4.03	41.44	52.73	44.84	3.855	3.79548e-35	--	DOR_ARATH RecName: Full=F-box protein DOR; AltName: Full=Protein DROUGHT TOLERANCE REPRESSOR;
Cluster-26631.0	5.8	3.56	3.53	60.95	26.67	25.13	2.90283	1.2403e-33	ko04016: MAPK signaling pathway - plant; ko04626: Plant-pathogen interaction	IOS1_ARATH RecName: Full=LRR receptor-like serine/threonine-protein kinase IOS1 {ECO:0000303|PubMed:21711359}; EC=2.7.11.- {ECO:0000255|PROSITE-ProRule:PRU00159}; AltName: Full=Protein IMPAIRED OOMYCETE SUSCEPTIBILITY 1 {ECO:0000303|PubMed:21711359}; Flags: Precursor;
Cluster-29434.12	1.15	0.33	1	69.48	109.65	67.57	6.35434	2.02879e-33	--	--
Cluster-29999.1	0.36	0.18	0.23	5.64	6.08	6.53	4.78119	4.12859e-33	ko04146: Peroxisome	PAHX_ARATH RecName: Full=Phytanoyl-CoA dioxygenase; EC=1.14.11.18; AltName: Full=Phytanoyl-CoA 2-hydroxylase;
Cluster-26055.4	582.39	466.29	456.86	82.64	88.61	91.12	-2.38911	8.24246e-33	ko00250: Alanine, aspartate and glutamate metabolism; ko01100: Metabolic pathways; ko01110: Biosynthesis of secondary metabolites; ko01230: Biosynthesis of amino acids	TSJT1_TOBAC RecName: Full=Stem-specific protein TSJT1;
Cluster-6713.1	10.73	3.23	10	443.2	674.33	459.02	6.22038	1.01454e-32	--	--
Cluster-20599.2	0.46	0.09	0.4	32.82	65.57	42.26	7.42995	1.02389e-32	ko00563: Glycosylphosphatidylinositol (GPI)-anchor biosynthesis; ko01100: Metabolic pathways	--
Cluster-1001.0	1.86	2.34	4.34	79.71	60.11	139.22	5.33441	1.16809e-32	--	BH126_ARATH RecName: Full=Transcription factor bHLH126; AltName: Full=Basic helix-loop-helix protein 126; Short=AtbHLH126; Short=bHLH 126; AltName: Full=Transcription factor EN 3; AltName: Full=bHLH transcription factor bHLH126;
Cluster-31805.0	21.76	41.53	41.59	961.82	1550.69	1780.44	5.53676	3.36635e-32	ko00350: Tyrosine metabolism; ko00360: Phenylalanine metabolism; ko01100: Metabolic pathways	--
Cluster-34394.3	2311.32	3266.29	2408.93	97.14	112.61	143.26	-4.39125	3.67136e-32	ko03040: Spliceosome; ko04141: Protein processing in endoplasmic reticulum; ko04144: Endocytosis	HSP7C_PETHY RecName: Full=Heat shock cognate 70 kDa protein;
Cluster-9747.2	159.36	30.57	112.4	86.92	0	65.87	-8.08088	1.18614e-31	--	--
Cluster-23822.4	14.66	13.89	17.2	57.93	63.27	63.58	2.14934	1.34103e-31	ko04130: SNARE interactions in vesicular transport	VA714_ARATH RecName: Full=Vesicle-associated membrane protein 714 {ECO:0000303|PubMed:11115874}; Short=AtVAMP714 {ECO:0000303|PubMed:11115874};
Cluster-28705.3	55.97	78.46	95.92	0	0	0	-15.3795	3.36028e-31	ko03008: Ribosome biogenesis in eukaryotes	CD48C_ARATH RecName: Full=Cell division control protein 48 homolog C; Short=AtCDC48c; AltName: Full=Protein EMBRYO DEFECTIVE 1354;
Cluster-1622.7	404.46	452.68	340.52	25	33.64	26.39	-3.69572	7.26555e-31	--	--
Cluster-16049.2	67.58	69.35	91.02	1.77	2.54	1.45	-4.84899	9.78309e-31	--	--
Cluster-16128.0	33	23.18	40.95	2.2	2.22	2.72	-3.60381	1.06333e-30	--	HIP36_ARATH RecName: Full=Heavy metal-associated isoprenylated plant protein 36 {ECO:0000303|PubMed:21072340, ECO:0000303|PubMed:23368984}; Short=AtHIP36 {ECO:0000303|PubMed:21072340, ECO:0000303|PubMed:23368984}; Flags: Precursor;
Cluster-26765.0	0.83	1.56	1.41	34.96	28.38	36.85	4.84095	1.44538e-30	--	PP141_ARATH RecName: Full=Pentatricopeptide repeat-containing protein At2g01740;
Cluster-2218.9	1.25	2.06	1.49	31.73	36.16	29.22	4.44733	2.68745e-30	ko00460: Cyanoamino acid metabolism; ko00500: Starch and sucrose metabolism; ko00999: Biosynthesis of various plant secondary metabolites; ko01100: Metabolic pathways; ko01110: Biosynthesis of secondary metabolites	BGL40_ARATH RecName: Full=Beta-glucosidase 40; Short=AtBGLU40; EC=3.2.1.21; Flags: Precursor;
Cluster-24627.4	248.84	346.86	128.43	0	0	0	-16.1841	5.02972e-30	--	NTL9_ARATH RecName: Full=Protein NTM1-like 9 {ECO:0000303|PubMed:17158162}; AltName: Full=Calmodulin-binding NAC protein {ECO:0000303|PubMed:17947243};
Cluster-24287.3	148.69	94.1	74.51	0	0	0	-15.1578	6.39631e-30	--	AMT2_ARATH RecName: Full=Ammonium transporter 2; Short=AtAMT2;
Cluster-27441.3	905.99	1548.6	788.17	26.76	19.25	27.6	-5.37714	1.16122e-29	ko00380: Tryptophan metabolism; ko00630: Glyoxylate and dicarboxylate metabolism; ko01100: Metabolic pathways; ko01110: Biosynthesis of secondary metabolites; ko01200: Carbon metabolism; ko04016: MAPK signaling pathway - plant; ko04146: Peroxisome	CATA2_GOSHI RecName: Full=Catalase isozyme 2; EC=1.11.1.6;
Cluster-27272.1	115.76	108.16	128.38	0	0	0	-14.3265	1.86152e-29	ko00190: Oxidative phosphorylation; ko01100: Metabolic pathways	QCR72_ARATH RecName: Full=Cytochrome b-c1 complex subunit 7-2, mitochondrial; AltName: Full=Complex III subunit 7-2; AltName: Full=Complex III subunit VII; AltName: Full=Ubiquinol-cytochrome c oxidoreductase subunit 7-2;
Cluster-25839.1	150.6	277.68	186.66	0	0	0	-15.2678	5.74013e-29	--	BAG5_ARATH RecName: Full=BAG family molecular chaperone regulator 5, mitochondrial; AltName: Full=Bcl-2-associated athanogene 5; Flags: Precursor;
Cluster-25906.0	43.95	50.28	69.91	5.42	4.64	4.89	-3.32416	7.18246e-29	--	CLPB3_ARATH RecName: Full=Chaperone protein ClpB3, chloroplastic; AltName: Full=ATP-dependent Clp protease ATP-binding subunit ClpB homolog 3; AltName: Full=Casein lytic proteinase B3; AltName: Full=Protein ALBINO OR PALE GREEN 6; Flags: Precursor;
Cluster-27604.0	447.55	513.51	393.3	25.32	35.68	21.84	-3.90607	1.12595e-28	--	DRMH3_ARATH RecName: Full=Dormancy-associated protein homolog 3 {ECO:0000305}; AltName: Full=DRM1 homolog 3 {ECO:0000305};
Cluster-14148.6	89.69	133.41	68.25	1.99	1.1	2.07	-5.73702	1.39543e-28	ko00270: Cysteine and methionine metabolism; ko01100: Metabolic pathways	MTBC1_VITVI RecName: Full=Probable bifunctional methylthioribulose-1-phosphate dehydratase/enolase-phosphatase E1 1 {ECO:0000255|HAMAP-Rule:MF_03118}; Includes: RecName: Full=Methylthioribulose-1-phosphate dehydratase {ECO:0000255|HAMAP-Rule:MF_03118}; Short=MTRu-1-P dehydratase {ECO:0000255|HAMAP-Rule:MF_03118}; EC=4.2.1.109 {ECO:0000255|HAMAP-Rule:MF_03118}; Includes: RecName: Full=Enolase-phos…
Cluster-14488.11	4245.41	4517.96	6985.23	25.37	83.78	39.65	-6.58056	1.39676e-28	ko04141: Protein processing in endoplasmic reticulum	HSP16_SOYBN RecName: Full=18.5 kDa class I heat shock protein; AltName: Full=HSP 18.5;
Cluster-28637.0	2.23	1.34	2.1	21.13	33.74	24.55	3.9629	1.39676e-28	--	M810_ARATH RecName: Full=Uncharacterized mitochondrial protein AtMg00810; AltName: Full=ORF240b;
Cluster-28702.2	110.33	80.89	86.98	0	0.51	0.29	-8.58746	1.50788e-28	--	H2B1_MEDTR RecName: Full=Probable histone H2B.1;
Cluster-25720.11	0	0	0	14.05	18.72	14.22	14.2682	2.50964e-28	ko00480: Glutathione metabolism; ko01100: Metabolic pathways	PRAF1_ARATH RecName: Full=PH, RCC1 and FYVE domains-containing protein 1 {ECO:0000303|PubMed:11563980}; AltName: Full=Protein Praf4 {ECO:0000303|PubMed:15358268};
Cluster-30650.6	709.86	1178.67	323.03	1.02	2.98	2.18	-8.48087	2.84882e-28	--	AGP16_ARATH RecName: Full=Arabinogalactan protein 16 {ECO:0000303|PubMed:11006345}; Short=AtAGP16 {ECO:0000303|PubMed:11006345}; AltName: Full=Arabinogalactan peptide 16 {ECO:0000303|PubMed:11006345}; Short=AG-peptide 16 {ECO:0000303|PubMed:11006345}; Flags: Precursor;
Cluster-10550.4	0	0	0	109.1	198.24	124.54	14.6854	5.00482e-28	ko03010: Ribosome	R15A1_ARATH RecName: Full=40S ribosomal protein S15a-1;
Cluster-50686.2	276.15	502.54	142.41	2.32	1.22	1.18	-7.55233	7.19581e-28	--	SAP8_ORYSI RecName: Full=Zinc finger A20 and AN1 domain-containing stress-associated protein 8; Short=OsSAP8; AltName: Full=Stress-associated protein 3;
Cluster-22003.9	120.7	224.5	337.61	0.08	0.58	0.13	-9.74344	1.03741e-27	ko04141: Protein processing in endoplasmic reticulum	HS25P_ARATH RecName: Full=Heat shock protein 21, chloroplastic {ECO:0000303|PubMed:2038305}; AltName: Full=25.3 kDa heat shock protein, chloroplastic; Short=AtHsp25.3; Flags: Precursor;
Cluster-10550.3	127.87	81.9	84.63	0	0	0	-14.1689	1.26591e-27	ko03010: Ribosome	R15A1_ARATH RecName: Full=40S ribosomal protein S15a-1;
Cluster-31330.0	212.59	272.33	217.02	0	0	0	-14.2888	1.4568e-27	--	Y1801_ARATH RecName: Full=MAPK kinase substrate protein At1g80180;
Cluster-23641.2	729.58	1435.98	277.24	0	0	0	-16.9503	1.81987e-27	--	XTH23_ARATH RecName: Full=Probable xyloglucan endotransglucosylase/hydrolase protein 23; Short=At-XTH23; Short=XTH-23; EC=2.4.1.207; Flags: Precursor;
Cluster-12072.1	0	0.3	0.25	37.74	35.13	45.07	8.07818	3.03693e-27	--	--
Cluster-29376.11	167.6	92.05	326.13	0	0	0	-15.3272	3.47901e-27	--	NUD18_ARATH RecName: Full=Nudix hydrolase 18, mitochondrial; Short=AtNUDT18; EC=3.6.1.-; Flags: Precursor;
Cluster-40689.1	202.42	158.01	217.17	0	0	0.07	-13.7345	3.47901e-27	ko00520: Amino sugar and nucleotide sugar metabolism; ko01100: Metabolic pathways; ko04016: MAPK signaling pathway - plant	CHI3_SOLTU RecName: Full=Endochitinase 3; EC=3.2.1.14; Flags: Precursor; Fragment;
Cluster-18598.6	288.55	144.68	243.88	1120.38	1510.5	1434.88	1.93623	4.42386e-27	ko00230: Purine metabolism; ko01100: Metabolic pathways; ko01232: Nucleotide metabolism	ADK2_ARATH RecName: Full=Adenosine kinase 2; Short=AK 2; EC=2.7.1.20; AltName: Full=Adenosine 5'-phosphotransferase 2;
Cluster-5188.3	51.51	44.91	58.95	0	0	0	-13.6868	8.98498e-27	ko00941: Flavonoid biosynthesis; ko00944: Flavone and flavonol biosynthesis; ko01100: Metabolic pathways; ko01110: Biosynthesis of secondary metabolites	C7A12_PANGI RecName: Full=Cytochrome P450 CYP736A12; EC=1.14.-.-;
Cluster-21594.12	11.24	12.29	15.71	1.22	1.13	1.4	-3.28088	3.10972e-26	--	FBD14_ARATH RecName: Full=Putative FBD-associated F-box protein At5g22720;
Cluster-18377.7	106.37	66.38	48.44	0	0	0.09	-11.3112	4.67894e-26	--	--
Cluster-29209.0	32.26	23.4	29.69	0	0	0	-13.4848	4.91966e-26	--	EIF3A_ARATH RecName: Full=Eukaryotic translation initiation factor 3 subunit A {ECO:0000255|HAMAP-Rule:MF_03000}; Short=eIF3a {ECO:0000255|HAMAP-Rule:MF_03000}; AltName: Full=Eukaryotic translation initiation factor 3 large subunit; AltName: Full=Eukaryotic translation initiation factor 3 subunit 10 {ECO:0000255|HAMAP-Rule:MF_03000}; AltName: Full=eIF-3-theta {ECO:0000255|HAMAP-Rule:MF_03000}; Al…
Cluster-29659.2	1.24	1.39	2.09	29.79	52.97	29.3	4.7098	5.787e-26	--	GCN5_ORYSJ RecName: Full=Histone acetyltransferase GCN5; EC=2.3.1.48;
Cluster-24554.1	118.62	278.87	120.81	0.35	0	0.24	-9.9393	6.40855e-26	--	MLP34_ARATH RecName: Full=MLP-like protein 34;
Cluster-19025.0	7.47	6.18	6.67	29.56	37.71	31.93	2.41283	7.8137e-26	ko04145: Phagosome	RAC7_ARATH RecName: Full=Rac-like GTP-binding protein ARAC7; AltName: Full=GTPase protein ROP9;
Cluster-28882.0	49.58	42.15	53.87	205.72	253.34	198.4	2.31239	1.06041e-25	--	--
Cluster-31745.0	4.97	6.63	9.84	185.84	153.29	294.27	4.96111	1.13843e-25	ko00908: Zeatin biosynthesis; ko01100: Metabolic pathways; ko01110: Biosynthesis of secondary metabolites	C7352_ARATH RecName: Full=Cytokinin hydroxylase; EC=1.14.13.-; AltName: Full=Cytochrome P450 35A2;
Cluster-18885.6	7.23	6.79	7.29	0.94	0.72	1	-2.88105	1.30806e-25	ko00511: Other glycan degradation	TAUE3_ARATH RecName: Full=Sulfite exporter TauE/SafE family protein 3 {ECO:0000312|EMBL:AEC07746.1};
Cluster-21159.1	5.45	8.76	6.62	75.48	69.43	65.65	3.33775	1.45267e-25	ko00460: Cyanoamino acid metabolism; ko01100: Metabolic pathways; ko01110: Biosynthesis of secondary metabolites	MDLL_ARATH RecName: Full=(R)-mandelonitrile lyase-like; EC=4.1.2.10; AltName: Full=Hydroxynitrile lyase-like; Short=(R)-oxynitrilase-like; Flags: Precursor;
Cluster-31890.2	17.07	20.17	26.57	1.35	1.23	0.86	-4.09865	1.63822e-25	ko00940: Phenylpropanoid biosynthesis; ko01100: Metabolic pathways; ko01110: Biosynthesis of secondary metabolites	PER15_IPOBA RecName: Full=Peroxidase 15 {ECO:0000303|PubMed:17936696}; Short=Prx15 {ECO:0000303|PubMed:17936696}; EC=1.11.1.7; AltName: Full=Anionic peroxidase {ECO:0000303|PubMed:17936696}; Flags: Precursor;
Cluster-29233.2	560.76	703.29	644.51	0	0	0.28	-13.5613	1.92644e-25	ko03010: Ribosome	RS263_ARATH RecName: Full=40S ribosomal protein S26-3;
Cluster-4352.5	65.21	54.78	75.71	0	0	0	-13.3565	2.31645e-25	ko03010: Ribosome	RK27_SPIOL RecName: Full=50S ribosomal protein L27, chloroplastic {ECO:0000303|PubMed:10874046}; AltName: Full=CL27; AltName: Full=Chloroplastic large ribosomal subunit protein bL27c {ECO:0000303|PubMed:28007896}; Flags: Precursor;
Cluster-20513.1	0.49	0.15	0.25	59.95	34.87	43.56	7.97225	2.42275e-25	--	--
Cluster-31266.0	27.93	29.96	41.19	2.67	2.98	2.12	-3.51638	2.42275e-25	ko04075: Plant hormone signal transduction	GH31_ARATH RecName: Full=Probable indole-3-acetic acid-amido synthetase GH3.1; EC=6.3.2.-; AltName: Full=Auxin-responsive GH3-like protein 1; Short=AtGH3-1;
Cluster-15603.16	305.33	263.28	545.8	0	0	0	-13.9891	2.4841e-25	--	--
Cluster-28306.10	0	0	0	22	23.06	22.41	13.2586	2.86348e-25	ko00130: Ubiquinone and other terpenoid-quinone biosynthesis; ko00940: Phenylpropanoid biosynthesis; ko00941: Flavonoid biosynthesis; ko00945: Stilbenoid, diarylheptanoid and gingerol biosynthesis; ko01100: Metabolic pathways; ko01110: Biosynthesis of secondary metabolites	TCMO_CATRO RecName: Full=Trans-cinnamate 4-monooxygenase; EC=1.14.14.91 {ECO:0000250|UniProtKB:Q04468}; AltName: Full=Cinnamic acid 4-hydroxylase; Short=C4H; Short=CA4H; AltName: Full=Cytochrome P450 73; AltName: Full=Cytochrome P450C4H;
Cluster-29307.0	17.05	16.64	23.28	186.18	228.54	147.14	3.4315	3.20778e-25	--	H41_WHEAT RecName: Full=Histone H4 variant TH011;
Cluster-24265.1	0.16	0.22	0.07	8.39	10.74	12.47	6.32716	3.20778e-25	--	RSLE3_ORYSJ RecName: Full=Zinc finger BED domain-containing protein RICESLEEPER 3; AltName: Full=Transposase-like protein RICESLEEPER 3;
Cluster-31783.0	33.65	32.06	49.9	0	0	0	-13.5744	3.4336e-25	--	BH143_ARATH RecName: Full=Transcription factor bHLH143; AltName: Full=Basic helix-loop-helix protein 143; Short=AtbHLH143; Short=bHLH 143; AltName: Full=Transcription factor EN 129; AltName: Full=bHLH transcription factor bHLH143;
Cluster-5188.4	0.14	0	0	47.59	44.56	35.96	10.075	3.56332e-25	ko00941: Flavonoid biosynthesis; ko00944: Flavone and flavonol biosynthesis; ko01100: Metabolic pathways; ko01110: Biosynthesis of secondary metabolites	C7A12_PANGI RecName: Full=Cytochrome P450 CYP736A12; EC=1.14.-.-;
Cluster-31162.2	59.23	80.13	52.31	3.29	1.78	2.12	-4.63798	4.54681e-25	--	--
Cluster-31890.3	189.82	78.24	87.01	0	0	0	-14.2433	5.20337e-25	ko00940: Phenylpropanoid biosynthesis; ko01100: Metabolic pathways; ko01110: Biosynthesis of secondary metabolites	PER15_IPOBA RecName: Full=Peroxidase 15 {ECO:0000303|PubMed:17936696}; Short=Prx15 {ECO:0000303|PubMed:17936696}; EC=1.11.1.7; AltName: Full=Anionic peroxidase {ECO:0000303|PubMed:17936696}; Flags: Precursor;
Cluster-18532.3	30.71	24.64	31.66	0	0	0	-13.1468	8.13383e-25	--	--
Cluster-21266.5	12.77	13.86	11.74	0	0	0	-13.3948	9.63939e-25	ko03250: Viral life cycle - HIV-1	GTE10_ARATH RecName: Full=Transcription factor GTE10; AltName: Full=Bromodomain-containing protein GTE10; AltName: Full=Nuclear protein X1; AltName: Full=Protein GLOBAL TRANSCRIPTION FACTOR GROUP E10;
Cluster-37474.0	872.98	1490.27	2627.64	18.72	35.22	19.58	-5.95726	1.05531e-24	ko04141: Protein processing in endoplasmic reticulum	HSP41_SOYBN RecName: Full=22.0 kDa class IV heat shock protein; Flags: Precursor;
Cluster-24595.0	135.83	128.07	75.26	3.14	2.46	1.26	-5.51228	1.75592e-24	ko00195: Photosynthesis; ko01100: Metabolic pathways	PSAE_SPIOL RecName: Full=Photosystem I reaction center subunit IV, chloroplastic; Short=PSI-E; Flags: Precursor;
Cluster-24281.3	125.06	84.16	163.35	0.44	0	0.32	-8.79623	1.81121e-24	ko00020: Citrate cycle (TCA cycle); ko01100: Metabolic pathways; ko01110: Biosynthesis of secondary metabolites	ACLA2_ARATH RecName: Full=ATP-citrate synthase alpha chain protein 2; Short=ATP-citrate synthase A-2; EC=2.3.3.8; AltName: Full=ATP-citrate lyase A-2; AltName: Full=Citrate cleavage enzyme A-2;
Cluster-23600.2	64.51	158.41	63.84	0	0	0	-14.9668	2.01882e-24	--	NDK1_PEA RecName: Full=Nucleoside diphosphate kinase 1; EC=2.7.4.6; AltName: Full=Nucleoside diphosphate kinase I; Short=NDK I; Short=NDP kinase I; Short=NDPK I;
Cluster-28457.3	0	0	0	23.79	34.26	28.65	13.3284	2.03901e-24	--	ENOX_SOLLC RecName: Full=2-methylene-furan-3-one reductase; EC=1.3.1.105 {ECO:0000269|PubMed:16517758}; AltName: Full=Enone oxidoreductase; Short=SlEO; Flags: Precursor;
Cluster-25467.1	0	0	0	40.67	25.36	39.24	13.4554	2.15123e-24	--	--
Cluster-27654.0	32.01	32.18	27.65	0	0	0	-13.2503	2.27702e-24	--	XXT2_ARATH RecName: Full=Xyloglucan 6-xylosyltransferase 2; Short=AtXT2; EC=2.4.2.39; AltName: Full=Putative glycosyltransferase 2; Short=AtGT2; EC=2.4.-.-;
Cluster-26905.7	25.26	42.18	41.95	0	0	0	-13.8005	2.28071e-24	ko04626: Plant-pathogen interaction	CDPKW_ARATH RecName: Full=Calcium-dependent protein kinase 32 {ECO:0000303|Ref.5}; EC=2.7.11.1 {ECO:0000305};
Cluster-29199.5	373.73	83.38	447.33	0.05	0	0	-13.9871	4.16217e-24	--	--
Cluster-16015.5	8.45	9.73	11.48	59.71	51.86	53.36	2.5635	5.00199e-24	ko00100: Steroid biosynthesis; ko01100: Metabolic pathways; ko01110: Biosynthesis of secondary metabolites	CP511_ARATH RecName: Full=Sterol 14-demethylase; EC=1.14.14.154 {ECO:0000269|PubMed:11437378, ECO:0000269|PubMed:16040657}; AltName: Full=Cytochrome P450 51A2; AltName: Full=Cytochrome P450 51G1; Short=AtCYP51; AltName: Full=Obtusifoliol 14-demethylase; AltName: Full=Protein EMBRYO DEFECTIVE 1738;
Cluster-24879.9	11.71	7.04	10.03	42.81	46.38	43.51	2.41685	6.47059e-24	--	--
Cluster-23731.6	54.53	68.76	38.11	0	0	0	-13.7636	6.97962e-24	ko03060: Protein export	TPP2_ARATH RecName: Full=Probable thylakoidal processing peptidase 2, chloroplastic; EC=3.4.21.89; AltName: Full=Signal peptidase I-2; Flags: Precursor;
Cluster-25697.1	69.06	59.74	65	0	0	0	-12.8717	1.06312e-23	ko04141: Protein processing in endoplasmic reticulum	RMA1_CAPAN RecName: Full=E3 ubiquitin-protein ligase RMA1H1; EC=2.3.2.27; AltName: Full=Protein RING membrane-anchor 1 homolog 1; AltName: Full=RING-type E3 ubiquitin transferase RMA1H1 {ECO:0000305};
Cluster-21983.5	0	0	0	85.58	154.06	105.65	13.4873	1.11473e-23	--	--
Cluster-2147.4	0	0	0	10.46	10.42	9	12.8773	1.40367e-23	--	--
Cluster-6713.4	0.57	0.35	0.55	6.87	7.81	10.34	4.26487	1.41195e-23	ko04016: MAPK signaling pathway - plant	FAMA_ARATH RecName: Full=Transcription factor FAMA; AltName: Full=Basic helix-loop-helix protein 97; Short=AtbHLH97; Short=bHLH 97; AltName: Full=Transcription factor EN 14; AltName: Full=bHLH transcription factor bHLH097;
Cluster-21375.4	31.37	23.6	28.67	75.61	82.73	77.92	1.60108	1.55876e-23	--	ALFL1_ARATH RecName: Full=PHD finger protein ALFIN-LIKE 1; Short=Protein AL1;
Cluster-1500.1	47.85	63.53	186.83	562.59	492.56	718.75	2.57363	1.62355e-23	ko04016: MAPK signaling pathway - plant	RTE1_ARATH RecName: Full=Protein REVERSION-TO-ETHYLENE SENSITIVITY1;
Cluster-26630.1	85.46	77.84	99.06	0	0	0	-12.8419	1.91852e-23	ko04626: Plant-pathogen interaction	CML13_ORYSJ RecName: Full=Probable calcium-binding protein CML13; AltName: Full=Calmodulin-like protein 13;
Cluster-29085.3	53.96	35.81	25.95	0	0	0	-13.4842	3.14289e-23	--	IDN2_ARATH RecName: Full=Protein INVOLVED IN DE NOVO 2 {ECO:0000303|PubMed:19915591}; AltName: Full=Protein RNA-DIRECTED DNA METHYLATION 12 {ECO:0000303|PubMed:20059743};
Cluster-29815.7	63.53	55.84	67.66	168.13	188.71	170.75	1.63103	3.31622e-23	ko03040: Spliceosome	RZ1C_ARATH RecName: Full=Glycine-rich RNA-binding protein RZ1C {ECO:0000305}; Short=AtRZ-1C {ECO:0000303|PubMed:20850334};
Cluster-80754.0	25.4	25.29	27.92	83.09	77.94	85.06	1.77456	3.31622e-23	ko00051: Fructose and mannose metabolism; ko00520: Amino sugar and nucleotide sugar metabolism; ko01100: Metabolic pathways; ko01250: Biosynthesis of nucleotide sugars	GMD1_ARATH RecName: Full=GDP-mannose 4,6 dehydratase 1; EC=4.2.1.47; AltName: Full=GDP-D-mannose dehydratase 1; Short=GMD 1;
Cluster-22871.6	9.89	6.8	8.17	1.34	1.25	1.52	-2.36459	3.83486e-23	--	C14C2_ORYSJ RecName: Full=Cytochrome P450 714C2; EC=1.14.-.-;
Cluster-25190.4	16.97	15.98	18.05	50.08	43.98	49.49	1.62626	5.48409e-23	--	TO401_ARATH RecName: Full=Mitochondrial import receptor subunit TOM40-1; AltName: Full=Translocase of outer membrane 40 kDa subunit homolog 1; Contains: RecName: Full=Mitochondrial import receptor subunit TOM40-1, N-terminally processed;
Cluster-29448.5	6.39	6.24	8.02	35.6	48.03	47.57	2.80652	5.91754e-23	ko00940: Phenylpropanoid biosynthesis; ko01100: Metabolic pathways; ko01110: Biosynthesis of secondary metabolites	CSE_ARATH RecName: Full=Caffeoylshikimate esterase; EC=3.1.1.-; AltName: Full=Lysophospholipase 2; Short=LysoPL2;
Cluster-28457.5	19.92	24.87	25.03	0	0	0	-12.975	6.40743e-23	--	ENOX_SOLLC RecName: Full=2-methylene-furan-3-one reductase; EC=1.3.1.105 {ECO:0000269|PubMed:16517758}; AltName: Full=Enone oxidoreductase; Short=SlEO; Flags: Precursor;
Cluster-27121.0	50.76	61.94	30	0	0	0	-13.6304	1.16817e-22	--	TBR_ARATH RecName: Full=Protein trichome birefringence;
Cluster-23053.0	20.26	26.97	19.13	0	0	0	-13.1404	1.27979e-22	--	IDE1_ARATH RecName: Full=Insulin-degrading enzyme-like 1, peroxisomal; EC=3.4.24.-; AltName: Full=Insulysin-like 1; AltName: Full=Peroxisomal M16 protease; AltName: Full=Zinc-metallopeptidase;
Cluster-20973.1	12.97	11.24	10.18	0.1	0.04	0	-7.93946	1.49495e-22	--	LCMT1_ARATH RecName: Full=Leucine carboxyl methyltransferase 1 homolog {ECO:0000305}; EC=2.1.1.233 {ECO:0000269|PubMed:21558554}; AltName: Full=Protein SUPPRESSOR OF BRI1 {ECO:0000303|PubMed:21558554}; AltName: Full=[Phosphatase 2A protein]-leucine-carboxy methyltransferase 1 {ECO:0000305};
Cluster-27680.0	0.06	0.11	0.04	5.85	5.6	4.52	6.35296	1.5632e-22	--	--
Cluster-28544.2	2.12	1.42	2.52	18.08	29.39	25.05	3.69698	1.7747e-22	ko03020: RNA polymerase	RPOB_CUCSA RecName: Full=DNA-directed RNA polymerase subunit beta {ECO:0000255|HAMAP-Rule:MF_01321}; EC=2.7.7.6 {ECO:0000255|HAMAP-Rule:MF_01321}; AltName: Full=PEP {ECO:0000255|HAMAP-Rule:MF_01321}; AltName: Full=Plastid-encoded RNA polymerase subunit beta {ECO:0000255|HAMAP-Rule:MF_01321}; Short=RNA polymerase subunit beta {ECO:0000255|HAMAP-Rule:MF_01321};
Cluster-14050.0	190.28	148.96	160.97	34.76	26.34	34.95	-2.23118	1.86541e-22	--	FLZ14_ARATH RecName: Full=FCS-Like Zinc finger 14 {ECO:0000303|PubMed:24901469};
Cluster-31951.3	59.51	132.6	31.11	0	0	0	-15.0185	3.1405e-22	--	NCL_ARATH RecName: Full=Sodium/calcium exchanger NCL {ECO:0000305}; AltName: Full=Na(+)/Ca(2+)-exchange protein NCL {ECO:0000305}; AltName: Full=Protein NCX-like {ECO:0000303|PubMed:23148213}; Short=AtNCL {ECO:0000303|PubMed:23148213};
Cluster-12829.1	25.64	20.3	21.66	0	0	0	-12.5207	3.32627e-22	--	ISY1_NEPCA RecName: Full=(S)-8-oxocitronellyl enol synthase ISY1 {ECO:0000305}; EC=1.3.1.122 {ECO:0000269|PubMed:29091815}; AltName: Full=Iridoid synthase 1 {ECO:0000303|PubMed:29091815}; Short=NcISY1 {ECO:0000303|PubMed:29091815};
Cluster-20858.1	19.53	19.09	21.68	0	0	0	-12.519	3.91331e-22	ko03050: Proteasome	PSA1B_ARATH RecName: Full=Proteasome subunit alpha type-1-B; AltName: Full=20S proteasome alpha subunit F-2; AltName: Full=Proteasome component 2B; AltName: Full=Proteasome subunit alpha type-6;
Cluster-23569.2	15.3	13.24	23.02	0	0	0	-12.8378	3.91331e-22	--	VP53A_ARATH RecName: Full=Vacuolar protein sorting-associated protein 53 A; Short=AtVPS53; AltName: Full=Protein HEAT-INTOLERANT 1;
Cluster-2738.5	61.81	75.06	60.9	0	0	0	-12.7718	5.40785e-22	--	--
Cluster-28718.0	19.96	19.59	20.61	0	0	0	-12.4842	5.51129e-22	--	SVR3_ARATH RecName: Full=Putative elongation factor TypA-like SVR3, chloroplastic; AltName: Full=Protein HAPPY ON NORFLURAZON 23 {ECO:0000303|PubMed:21208309}; AltName: Full=Protein SUPPRESSOR OF VARIEGATION 3 {ECO:0000303|PubMed:21187014}; Flags: Precursor;
Cluster-17940.0	18.27	22.63	20.57	2.92	2.4	2.98	-2.86936	6.26396e-22	ko03430: Mismatch repair	MSH7_ARATH RecName: Full=DNA mismatch repair protein MSH7; Short=AtMSH7; AltName: Full=MutS protein homolog 7;
Cluster-22205.0	73.85	68.44	51.8	0	0	0.22	-9.84912	6.68693e-22	--	IF5A2_SOLLC RecName: Full=Eukaryotic translation initiation factor 5A-2; Short=eIF-5A-2;
Cluster-26085.10	21.29	17.71	31.92	0	0	0	-12.7796	7.6868e-22	ko04016: MAPK signaling pathway - plant; ko04070: Phosphatidylinositol signaling system; ko04626: Plant-pathogen interaction	CALM1_DAUCA RecName: Full=Calmodulin-1/11/16; Short=CaM-1/11/16;
Cluster-25302.2	10	10.88	11.49	0	0	0	-12.5123	9.24805e-22	ko03018: RNA degradation	--
Cluster-14488.9	742.88	1584.95	4337.45	9.6	3.11	11.32	-7.98842	1.13797e-21	ko04141: Protein processing in endoplasmic reticulum	HSP16_SOYBN RecName: Full=18.5 kDa class I heat shock protein; AltName: Full=HSP 18.5;
Cluster-14148.1	30.56	33.24	18.3	0	0	0	-13.1236	1.32504e-21	ko00270: Cysteine and methionine metabolism; ko01100: Metabolic pathways	MTBC1_VITVI RecName: Full=Probable bifunctional methylthioribulose-1-phosphate dehydratase/enolase-phosphatase E1 1 {ECO:0000255|HAMAP-Rule:MF_03118}; Includes: RecName: Full=Methylthioribulose-1-phosphate dehydratase {ECO:0000255|HAMAP-Rule:MF_03118}; Short=MTRu-1-P dehydratase {ECO:0000255|HAMAP-Rule:MF_03118}; EC=4.2.1.109 {ECO:0000255|HAMAP-Rule:MF_03118}; Includes: RecName: Full=Enolase-phos…
Cluster-28020.1	20.9	22.57	18.33	0	0	0	-12.5996	1.35236e-21	ko04141: Protein processing in endoplasmic reticulum	HRD3A_ARATH RecName: Full=ERAD-associated E3 ubiquitin-protein ligase component HRD3A {ECO:0000305}; AltName: Full=AtSel1A {ECO:0000303|PubMed:21187394}; AltName: Full=Protein EMS-MUTAGENIZED BRI1 SUPPRESSOR 5 {ECO:0000303|PubMed:21187394}; Flags: Precursor;
Cluster-21377.5	16.07	38.52	30.15	0.09	0	0.04	-9.31316	1.61179e-21	ko04141: Protein processing in endoplasmic reticulum	PP207_ARATH RecName: Full=Pentatricopeptide repeat-containing protein At3g02330, mitochondrial; AltName: Full=Mitochondrial editing factor 13 {ECO:0000303|PubMed:26048647}; Flags: Precursor;
Cluster-26359.1	78.4	86.91	110.09	0	0	0	-12.5325	1.62446e-21	ko00190: Oxidative phosphorylation; ko01100: Metabolic pathways	--
Cluster-28490.1	95.17	38.09	26.52	0	0	0	-13.9512	2.05105e-21	ko03040: Spliceosome	RH14_ARATH RecName: Full=DEAD-box ATP-dependent RNA helicase 14; EC=3.6.4.13;
Cluster-10239.2	0	0	0	44.39	51.12	37.97	12.4352	2.10402e-21	ko01100: Metabolic pathways; ko01200: Carbon metabolism	SFGH_ARATH RecName: Full=S-formylglutathione hydrolase; Short=AtSFGH; EC=3.1.2.12; AltName: Full=Esterase D;
Cluster-24361.6	27.51	17.83	24.84	0	0	0	-12.3561	2.42372e-21	ko00010: Glycolysis / Gluconeogenesis; ko00030: Pentose phosphate pathway; ko00051: Fructose and mannose metabolism; ko00052: Galactose metabolism; ko01100: Metabolic pathways; ko01110: Biosynthesis of secondary metabolites; ko01200: Carbon metabolism; ko01230: Biosynthesis of amino acids; ko03018: RNA degradation	PFKA3_ARATH RecName: Full=ATP-dependent 6-phosphofructokinase 3 {ECO:0000255|HAMAP-Rule:MF_03186}; Short=ATP-PFK 3 {ECO:0000255|HAMAP-Rule:MF_03186}; Short=Phosphofructokinase 3 {ECO:0000255|HAMAP-Rule:MF_03186}; EC=2.7.1.11 {ECO:0000255|HAMAP-Rule:MF_03186}; AltName: Full=Phosphohexokinase 3 {ECO:0000255|HAMAP-Rule:MF_03186};
Cluster-21139.5	42.7	52.46	107.55	0.21	0.8	0.32	-7.22464	2.42798e-21	--	P23A_BRANA RecName: Full=Co-chaperone protein p23-1 {ECO:0000305}; AltName: Full=Bnp23-1 {ECO:0000303|PubMed:20349287};
Cluster-25302.4	0	0	0	9.87	8.37	8.28	12.2762	2.90669e-21	ko03018: RNA degradation	--
Cluster-4616.0	23.84	21.13	28.24	3.23	3.83	4.46	-2.53247	3.05854e-21	--	PTR16_ARATH RecName: Full=Protein NRT1/ PTR FAMILY 4.3; Short=AtNPF4.3; AltName: Full=Nitrate transporter 1.14;
Cluster-18532.5	0	0	0	35.66	15.26	29.01	13.1064	3.08413e-21	--	--
Cluster-14488.18	211.81	400.94	586.24	0	0	0.12	-13.2795	3.13609e-21	ko04141: Protein processing in endoplasmic reticulum	HSP16_SOYBN RecName: Full=18.5 kDa class I heat shock protein; AltName: Full=HSP 18.5;
Cluster-19763.2	57.5	24.14	50.58	0	0	0	-12.8957	3.20093e-21	--	FB331_ARATH RecName: Full=Probable F-box protein At3g61730; AltName: Full=Protein RFM; AltName: Full=Reduced male fertility protein;
Cluster-31960.0	21.01	24.68	20.86	0	0	0	-12.5059	3.25197e-21	ko00260: Glycine, serine and threonine metabolism; ko00290: Valine, leucine and isoleucine biosynthesis; ko01100: Metabolic pathways; ko01110: Biosynthesis of secondary metabolites; ko01200: Carbon metabolism; ko01230: Biosynthesis of amino acids	TD1_SOLLC RecName: Full=Threonine dehydratase 1 biosynthetic, chloroplastic {ECO:0000305}; EC=4.3.1.19 {ECO:0000255|RuleBase:RU362012, ECO:0000269|PubMed:21436043}; AltName: Full=SlTD1 {ECO:0000303|PubMed:17416643}; AltName: Full=Threonine deaminase 1 {ECO:0000303|PubMed:21436043}; Flags: Precursor;
Cluster-30038.2	353.16	306.6	388.29	77.31	53.4	58.31	-2.28419	3.26506e-21	ko04075: Plant hormone signal transduction	IAA9_ARATH RecName: Full=Auxin-responsive protein IAA9; AltName: Full=Indoleacetic acid-induced protein 9;
Cluster-28110.7	0	0	0	6.7	4.78	5.24	12.3932	3.43251e-21	ko00460: Cyanoamino acid metabolism; ko00500: Starch and sucrose metabolism; ko00999: Biosynthesis of various plant secondary metabolites; ko01100: Metabolic pathways; ko01110: Biosynthesis of secondary metabolites	XYL2_MEDSV RecName: Full=Beta-xylosidase/alpha-L-arabinofuranosidase 2 {ECO:0000303|PubMed:17615411, ECO:0000312|EMBL:ABQ45228.1}; AltName: Full=Xylan 1,4-beta-xylosidase/Alpha-L-arabinofuranosidase 2; Short=MsXyl2 {ECO:0000303|PubMed:17615411}; Includes: RecName: Full=Beta-xylosidase; EC=3.2.1.37; AltName: Full=1,4-beta-D-xylan xylohydrolase {ECO:0000250|UniProtKB:P48792}; AltName: Full=Xylan 1,…
Cluster-27430.1	5.49	4.48	5.25	12.98	12.56	12.42	1.45684	3.52231e-21	ko03030: DNA replication; ko03420: Nucleotide excision repair; ko03430: Mismatch repair; ko03440: Homologous recombination	RFA1C_ARATH RecName: Full=Replication protein A 70 kDa DNA-binding subunit C; Short=AtRPA70c; AltName: Full=AtRPA1-2; AltName: Full=Replication factor A protein 1C; AltName: Full=Replication protein A 1C; Short=AtRPA1C;
Cluster-26722.6	11.84	8.15	9.57	42.72	45.47	56.05	2.4325	3.67123e-21	ko00220: Arginine biosynthesis; ko00250: Alanine, aspartate and glutamate metabolism; ko00910: Nitrogen metabolism; ko01100: Metabolic pathways; ko01200: Carbon metabolism	DHE1_ARATH RecName: Full=Glutamate dehydrogenase 1; Short=GDH 1; EC=1.4.1.3;
Cluster-40689.3	1.67	0.64	0.73	35.65	82.07	36.28	5.84745	3.82183e-21	ko00520: Amino sugar and nucleotide sugar metabolism; ko01100: Metabolic pathways; ko04016: MAPK signaling pathway - plant	CHIB_VITVI RecName: Full=Basic endochitinase; EC=3.2.1.14; Flags: Precursor;
Cluster-25804.0	22.53	17.04	20.32	61.36	59.61	60.85	1.70275	3.90295e-21	--	--
Cluster-22694.5	13.59	12.36	8.59	0	0	0	-12.6706	3.96791e-21	ko00520: Amino sugar and nucleotide sugar metabolism; ko01100: Metabolic pathways; ko01250: Biosynthesis of nucleotide sugars	ARAE1_ARATH RecName: Full=UDP-arabinose 4-epimerase 1; EC=5.1.3.5; AltName: Full=UDP-D-xylose 4-epimerase 1;
Cluster-22375.8	5.06	6.46	10.82	0	0	0	-12.9879	4.03651e-21	ko00564: Glycerophospholipid metabolism	GDPD1_ARATH RecName: Full=Glycerophosphodiester phosphodiesterase GDPD1, chloroplastic {ECO:0000305}; EC=3.1.4.46 {ECO:0000269|PubMed:21323773}; AltName: Full=Glycerophosphodiester phosphodiesterase 1 {ECO:0000303|PubMed:21323773}; Short=AtGDPD1 {ECO:0000303|PubMed:21323773}; AltName: Full=Protein SENESCENCE-RELATED GENE 3 {ECO:0000303|PubMed:8883383}; Flags: Precursor;
Cluster-24959.1	126.25	72	105.37	0.78	0.24	1.59	-6.73678	4.08228e-21	--	MORF8_ARATH RecName: Full=Multiple organellar RNA editing factor 8, chloroplastic/mitochondrial {ECO:0000305}; AltName: Full=RNA editing-interacting protein 1 {ECO:0000303|PubMed:22566615}; Flags: Precursor;
Cluster-14148.7	2.89	2.17	3.97	31.14	20.55	27.72	3.28675	4.59034e-21	ko00270: Cysteine and methionine metabolism; ko01100: Metabolic pathways	MTBC1_VITVI RecName: Full=Probable bifunctional methylthioribulose-1-phosphate dehydratase/enolase-phosphatase E1 1 {ECO:0000255|HAMAP-Rule:MF_03118}; Includes: RecName: Full=Methylthioribulose-1-phosphate dehydratase {ECO:0000255|HAMAP-Rule:MF_03118}; Short=MTRu-1-P dehydratase {ECO:0000255|HAMAP-Rule:MF_03118}; EC=4.2.1.109 {ECO:0000255|HAMAP-Rule:MF_03118}; Includes: RecName: Full=Enolase-phos…
Cluster-23125.2	7.04	5.52	3.88	0.1	0.12	0.07	-5.85139	4.76077e-21	--	--
Cluster-12829.2	0	0	0	18.81	27.11	17.76	12.5167	5.83472e-21	--	ISY1_NEPCA RecName: Full=(S)-8-oxocitronellyl enol synthase ISY1 {ECO:0000305}; EC=1.3.1.122 {ECO:0000269|PubMed:29091815}; AltName: Full=Iridoid synthase 1 {ECO:0000303|PubMed:29091815}; Short=NcISY1 {ECO:0000303|PubMed:29091815};
Cluster-24690.1	22.86	36.46	28.1	0	0	0	-12.8015	5.83472e-21	--	--
Cluster-15572.0	18.37	17.88	27.86	1.77	1.57	2.41	-3.33884	5.92339e-21	--	DNJA6_ARATH RecName: Full=Chaperone protein dnaJ A6, chloroplastic {ECO:0000305}; Short=atDjA6 {ECO:0000303|PubMed:23894646}; AltName: Full=Chaperone protein dnaJ A26 {ECO:0000303|PubMed:11599562}; Short=AtDjA26 {ECO:0000303|PubMed:11599562}; Flags: Precursor;
Cluster-26085.4	12.12	25.71	18.3	0	0	0	-13.2212	6.6057e-21	--	KINB1_ARATH RecName: Full=SNF1-related protein kinase regulatory subunit beta-1; Short=AKIN subunit beta-1; Short=AKINB1; Short=AKINbeta1;
Cluster-26855.0	33.87	16.53	31.8	233.8	279.5	247.2	3.32832	7.98012e-21	--	--
Cluster-8849.10	8.36	5.45	6.34	0	0	0	-12.2487	8.10175e-21	ko04075: Plant hormone signal transduction	SCL14_ARATH RecName: Full=Scarecrow-like protein 14; Short=AtSCL14; AltName: Full=GRAS family protein 2; Short=AtGRAS-2;
Cluster-27540.2	6.3	6.56	6.49	0	0	0	-12.2139	8.82441e-21	ko00270: Cysteine and methionine metabolism; ko01100: Metabolic pathways	--
Cluster-28306.13	0.92	0.33	1.69	35.81	49.14	43.57	5.66521	9.97204e-21	ko00130: Ubiquinone and other terpenoid-quinone biosynthesis; ko00940: Phenylpropanoid biosynthesis; ko00941: Flavonoid biosynthesis; ko00945: Stilbenoid, diarylheptanoid and gingerol biosynthesis; ko01100: Metabolic pathways; ko01110: Biosynthesis of secondary metabolites	TCMO_NARPS RecName: Full=Trans-cinnamate 4-monooxygenase {ECO:0000305}; EC=1.14.14.91 {ECO:0000250|UniProtKB:Q04468}; AltName: Full=Cinnamic acid 4-hydroxylase {ECO:0000303|PubMed:29229969}; Short=C4H {ECO:0000303|PubMed:29229969}; Short=CA4H {ECO:0000305}; AltName: Full=Cytochrome P450 C4H {ECO:0000305};
Cluster-27538.3	69.12	56.22	68.2	140.28	130.79	145.43	1.2432	1.06338e-20	ko03015: mRNA surveillance pathway; ko04136: Autophagy - other	PP2A_TOBAC RecName: Full=Serine/threonine-protein phosphatase PP2A catalytic subunit; EC=3.1.3.16;
Cluster-29199.3	0	0	0	23.86	51.45	39.63	12.8745	1.19633e-20	--	--
Cluster-22896.2	0.74	0.79	0.4	12.23	15.37	16.23	4.67239	1.51537e-20	--	VPS41_SOLLC RecName: Full=Vacuolar protein sorting-associated protein 41 homolog;
Cluster-17016.7	0	0	0	23.48	32.36	28.9	12.2218	1.85678e-20	--	--
Cluster-26384.0	0.82	1	1.14	11.23	12.94	12.61	3.71636	1.95905e-20	--	--
Cluster-6713.9	1.15	0.14	0.71	20.32	37.11	28.21	6.03815	2.26539e-20	ko04016: MAPK signaling pathway - plant	FAMA_ARATH RecName: Full=Transcription factor FAMA; AltName: Full=Basic helix-loop-helix protein 97; Short=AtbHLH97; Short=bHLH 97; AltName: Full=Transcription factor EN 14; AltName: Full=bHLH transcription factor bHLH097;
Cluster-3755.6	18.64	25.16	11.89	0	0	0	-13.0067	2.53967e-20	--	--
Cluster-10239.5	44.09	46.76	34.51	0	0	0	-12.3218	2.95634e-20	ko01100: Metabolic pathways; ko01200: Carbon metabolism	SFGH_ARATH RecName: Full=S-formylglutathione hydrolase; Short=AtSFGH; EC=3.1.2.12; AltName: Full=Esterase D;
Cluster-18390.5	204.29	354.72	393.49	0.95	0	1.58	-8.54162	3.05089e-20	--	--
Cluster-6914.4	3.68	3.73	4.87	26.17	32.6	21.53	2.84463	3.05089e-20	--	PGIP_VITVI RecName: Full=Polygalacturonase inhibitor {ECO:0000250|UniProtKB:P58822}; AltName: Full=Polygalacturonase-inhibiting protein {ECO:0000250|UniProtKB:P58822, ECO:0000312|EMBL:AAM74142.1}; Short=PGIG; Flags: Precursor;
Cluster-21908.4	0	0	0	16.99	17.52	22.01	12.0884	3.45712e-20	ko03018: RNA degradation	HESO1_ARATH RecName: Full=Protein HESO1 {ECO:0000303|PubMed:22464194}; EC=2.7.7.52 {ECO:0000269|PubMed:22464194}; AltName: Full=HEN1 suppressor 1 {ECO:0000303|PubMed:22464194}; AltName: Full=RNA uridylyltransferase {ECO:0000305};
Cluster-29144.0	4.58	5.06	5.36	28.43	24.26	22.2	2.44637	3.63589e-20	ko00380: Tryptophan metabolism; ko00966: Glucosinolate biosynthesis; ko01100: Metabolic pathways; ko01110: Biosynthesis of secondary metabolites; ko01210: 2-Oxocarboxylic acid metabolism	74AC1_SIRGR RecName: Full=Mogroside IE synthase {ECO:0000305}; EC=2.4.1.350 {ECO:0000269|PubMed:25759326, ECO:0000269|Ref.3}; AltName: Full=UDP-glycosyltransferase 74AC1 {ECO:0000303|PubMed:25759326};
Cluster-24068.0	20.95	15.8	16.29	3.33	2.31	2.75	-2.53283	3.79243e-20	ko04075: Plant hormone signal transduction	SCL14_ARATH RecName: Full=Scarecrow-like protein 14; Short=AtSCL14; AltName: Full=GRAS family protein 2; Short=AtGRAS-2;
Cluster-27415.2	29.98	42.58	25.63	0	0	0	-12.6313	4.66583e-20	--	P2C25_ARATH RecName: Full=Probable protein phosphatase 2C 25; Short=AtPP2C25; EC=3.1.3.16; AltName: Full=Protein phosphatase AP2C1;
Cluster-28306.7	37.15	32.56	37.53	3.4	2.17	4.32	-3.30547	4.79227e-20	ko00130: Ubiquinone and other terpenoid-quinone biosynthesis; ko00940: Phenylpropanoid biosynthesis; ko00941: Flavonoid biosynthesis; ko00945: Stilbenoid, diarylheptanoid and gingerol biosynthesis; ko01100: Metabolic pathways; ko01110: Biosynthesis of secondary metabolites	TCMO_CATRO RecName: Full=Trans-cinnamate 4-monooxygenase; EC=1.14.14.91 {ECO:0000250|UniProtKB:Q04468}; AltName: Full=Cinnamic acid 4-hydroxylase; Short=C4H; Short=CA4H; AltName: Full=Cytochrome P450 73; AltName: Full=Cytochrome P450C4H;
Cluster-11022.2	13.09	16.82	15.88	0	0	0	-12.2088	5.33391e-20	ko00270: Cysteine and methionine metabolism; ko01100: Metabolic pathways	MTK_ARATH RecName: Full=Methylthioribose kinase; Short=AtMTK; Short=MTR kinase; EC=2.7.1.100;
Cluster-31245.2	25.35	23.13	30.27	128.83	104.62	89.05	2.4951	6.80863e-20	--	NAC46_ARATH RecName: Full=NAC domain-containing protein 46 {ECO:0000303|PubMed:15029955}; Short=ANAC046 {ECO:0000303|PubMed:15029955};
Cluster-23822.7	0.58	0.27	0.51	9.46	8.59	18.53	4.92902	8.47283e-20	ko04130: SNARE interactions in vesicular transport	SRM1_ARATH RecName: Full=Transcription factor SRM1 {ECO:0000305}; AltName: Full=Myb-related protein SRM1 {ECO:0000305}; AltName: Full=Protein SALT-RELATED MYB 1 {ECO:0000303|PubMed:26243618};
Cluster-27444.2	6.98	15.81	11.6	0	0	0.01	-11.5755	8.50341e-20	--	AP180_ARATH RecName: Full=Clathrin coat assembly protein AP180; Short=At-AP180; AltName: Full=Clathrin coat-associated protein AP180;
Cluster-16550.0	106.1	136.07	69.92	0	0	0	-12.6633	1.00017e-19	--	--
Cluster-28845.5	0	0	0	5.46	8.52	6.56	12.1521	1.04101e-19	--	B2_DAUCA RecName: Full=B2 protein;
Cluster-19956.4	19.72	17.1	24.34	0	0	0	-11.9049	1.09027e-19	ko04141: Protein processing in endoplasmic reticulum	--
Cluster-21879.7	25.34	37.11	14.24	0	0	0	-13.1572	1.09027e-19	--	STOP1_ARATH RecName: Full=Protein SENSITIVE TO PROTON RHIZOTOXICITY 1 {ECO:0000303|PubMed:17535918}; AltName: Full=Zinc finger protein STOP1 {ECO:0000303|PubMed:17535918};
Cluster-29245.0	6.9	9	10.29	145.71	438.21	291.66	5.19487	1.09027e-19	--	--
Cluster-27443.2	17.8	23.46	29.19	0	0	0	-12.2455	1.17914e-19	--	LOR12_ARATH RecName: Full=Protein LURP-one-related 12;
Cluster-27443.1	0	0	0	20.59	16.6	15.55	11.906	1.23016e-19	--	LOR12_ARATH RecName: Full=Protein LURP-one-related 12;
Cluster-8818.0	19.71	12.56	19.73	3.28	2.88	2.78	-2.38355	1.28261e-19	ko04075: Plant hormone signal transduction	TGA9_ARATH RecName: Full=Transcription factor TGA9 {ECO:0000303|PubMed:20805327}; AltName: Full=Protein TGACG (TGA) motif-binding protein 9 {ECO:0000303|PubMed:20805327}; AltName: Full=bZIP transcription factor 21 {ECO:0000303|PubMed:11906833}; Short=AtbZIP21 {ECO:0000303|PubMed:11906833};
Cluster-25836.0	14.17	9.46	16.98	84.81	71.61	102.59	2.80429	1.36752e-19	--	--
Cluster-23637.3	0	0	0	32.76	64.18	43.7	12.4138	1.77598e-19	--	--
Cluster-12651.3	34.05	18.87	23.44	4.07	1.66	4.52	-3.10521	1.83647e-19	ko00350: Tyrosine metabolism; ko01100: Metabolic pathways	FAHD1_ARATH RecName: Full=Probable acylpyruvase FAHD1, mitochondrial {ECO:0000305}; EC=3.7.1.5 {ECO:0000305}; AltName: Full=Fumarylacetoacetate hydrolase domain-containing protein 1 {ECO:0000305}; Short=FAH domain-containing protein 1 {ECO:0000305}; Flags: Precursor;
Cluster-10426.0	28.43	16.7	32.72	0.22	0	0.23	-7.24413	1.85393e-19	--	--
Cluster-28265.6	73.85	27.63	28.62	0	0	0	-12.9258	1.86369e-19	ko00250: Alanine, aspartate and glutamate metabolism; ko00410: beta-Alanine metabolism; ko00430: Taurine and hypotaurine metabolism; ko00650: Butanoate metabolism; ko01100: Metabolic pathways; ko01110: Biosynthesis of secondary metabolites	DCE_PETHY RecName: Full=Glutamate decarboxylase; Short=GAD; EC=4.1.1.15;
Cluster-21622.4	31.39	12.08	28.53	0	0.04	0	-11.0996	2.00364e-19	--	FRI1_BRANA RecName: Full=Ferritin-1, chloroplastic; EC=1.16.3.1; Flags: Precursor;
Cluster-7326.2	39.22	37.15	35.29	1.14	2.43	2.13	-4.20842	2.06928e-19	--	--
Cluster-21106.7	20	47.8	37.15	0.14	0.28	0.2	-7.76771	2.16833e-19	--	ERDL8_ARATH RecName: Full=Sugar transporter ERD6-like 8;
Cluster-29535.0	38.44	22.55	19.17	0	0	0	-12.3355	2.16833e-19	--	ATL55_ARATH RecName: Full=E3 ubiquitin-protein ligase RING1; EC=2.3.2.27 {ECO:0000269|PubMed:18643987}; AltName: Full=RING-H2 finger protein ATL55; AltName: Full=RING-type E3 ubiquitin transferase ATL55 {ECO:0000305};
Cluster-17485.0	40.75	65.21	71.92	0	0	0	-12.3599	2.20104e-19	--	--
Cluster-26371.6	0	0	0	16.6	28.87	29.94	12.3079	2.35127e-19	--	SOK5_ARATH RecName: Full=Protein SOSEKI 5 {ECO:0000303|PubMed:30737509}; Short=AtSOK5 {ECO:0000303|PubMed:32004461};
Cluster-27810.0	0.47	1	0.82	10.96	12.91	12.95	3.97728	2.50743e-19	--	SRO2_ARATH RecName: Full=Probable inactive poly [ADP-ribose] polymerase SRO2; AltName: Full=Protein SIMILAR TO RCD ONE 2;
Cluster-22809.1	12.57	9.39	13.67	38.63	41.2	36.76	1.85528	2.6395e-19	--	ARF1_SALBA RecName: Full=ADP-ribosylation factor 1;
Cluster-2534.4	22.26	21.62	32.8	2.11	0.92	1.94	-4.2015	2.77221e-19	--	--
Cluster-28262.3	14.8	18.36	13.49	0	0	0	-12.102	3.0708e-19	ko00900: Terpenoid backbone biosynthesis; ko01110: Biosynthesis of secondary metabolites	PHYK3_SOYBN RecName: Full=Probable phytol kinase 3, chloroplastic; EC=2.7.1.182; Flags: Precursor;
Cluster-26471.0	7.82	8.22	9.48	0	0	0	-11.7889	3.38263e-19	--	SL11_ORYSI RecName: Full=Protein spotted leaf 11; EC=2.3.2.27; AltName: Full=Cell death-related protein SPL11; AltName: Full=RING-type E3 ubiquitin transferase SPL11 {ECO:0000305};
Cluster-23422.25	100.71	97.42	118.55	322.24	352.88	452.73	2.0455	3.42874e-19	ko00900: Terpenoid backbone biosynthesis; ko01100: Metabolic pathways; ko01110: Biosynthesis of secondary metabolites	MVD2_PANGI RecName: Full=Diphosphomevalonate decarboxylase 2 {ECO:0000305}; Short=Mevalonate-5-pyrophosphate decarboxylase {ECO:0000303|PubMed:24933610}; Short=PgMVD {ECO:0000303|PubMed:24933610}; EC=4.1.1.33 {ECO:0000250|UniProtKB:O23722};
Cluster-26151.3	10.28	10.97	10.22	0	0	0	-11.8189	3.43181e-19	--	ROH1_ARATH RecName: Full=Protein ROH1 {ECO:0000303|PubMed:20618910};
Cluster-28767.2	36.42	32.28	11.01	0	0	0	-13.2932	3.51629e-19	ko00010: Glycolysis / Gluconeogenesis; ko00052: Galactose metabolism; ko01100: Metabolic pathways; ko01110: Biosynthesis of secondary metabolites	--
Cluster-21916.2	0	0	0	36.48	22.85	29.33	11.9384	3.71642e-19	--	--
Cluster-30031.0	9.39	21.32	11.52	0.21	0.05	0.13	-6.67035	4.77371e-19	--	--
Cluster-21106.2	12.51	9.77	15.61	0.18	0.13	0.06	-6.63198	4.87844e-19	--	ERDL8_ARATH RecName: Full=Sugar transporter ERD6-like 8;
Cluster-27231.1	7.39	6.71	6.08	0	0	0	-11.7547	4.96266e-19	--	CFM3_MAIZE RecName: Full=CRM-domain containing factor CFM3, chloroplastic/mitochondrial {ECO:0000305}; AltName: Full=Protein CRM FAMILY MEMBER 3 {ECO:0000303|PubMed:18799595}; Short=ZmCFM3 {ECO:0000303|PubMed:18799595}; Flags: Precursor;
Cluster-31961.0	121.2	105.67	184.02	12.6	16.31	10.23	-3.27414	5.83197e-19	--	HSA32_ARATH RecName: Full=Protein HEAT-STRESS-ASSOCIATED 32 {ECO:0000303|PubMed:16500991}; Short=Heat-stress-associated 32-kDa protein {ECO:0000303|PubMed:16500991};
Cluster-28527.4	0	0	0	11.23	43.04	14.73	13.5818	5.96628e-19	--	IPCS1_ARATH RecName: Full=Phosphatidylinositol:ceramide inositolphosphotransferase 1; EC=2.7.8.-; AltName: Full=Inositol-phosphorylceramide synthase 1; Short=AtIPCS1; Short=IPC synthase 1; AltName: Full=Protein ERH1-like2; AltName: Full=Sphingolipid synthase 1;
Cluster-29799.0	13.3	18.04	15.78	0	0	0	-11.9885	5.96628e-19	ko04075: Plant hormone signal transduction	NOH1_ORYSJ RecName: Full=Transcription factor NIGTH1 {ECO:0000305}; AltName: Full=MYB-domain transcription factor NIGT1 homolog 1 {ECO:0000305};
Cluster-24102.1	22.65	41.44	27.22	0.18	0.09	0	-8.40983	6.00823e-19	--	--
Cluster-28967.0	49.5	36.54	47.86	144.61	169.4	130.93	1.85489	6.32256e-19	--	CDI_ARATH RecName: Full=Protein CDI {ECO:0000305}; AltName: Full=Protein CADMIUM INDUCED {ECO:0000303|PubMed:22569258};
Cluster-14488.17	2265.61	4355.22	2635.7	25.52	50.47	31.45	-6.09578	6.35403e-19	ko04141: Protein processing in endoplasmic reticulum	HSP16_SOYBN RecName: Full=18.5 kDa class I heat shock protein; AltName: Full=HSP 18.5;
Cluster-11978.0	7.41	9.55	10.52	0.32	0.21	0.41	-4.85846	6.40665e-19	ko00900: Terpenoid backbone biosynthesis; ko00909: Sesquiterpenoid and triterpenoid biosynthesis; ko01110: Biosynthesis of secondary metabolites	BAN_ARATH RecName: Full=Anthocyanidin reductase; Short=AtANR {ECO:0000303|PubMed:14725861}; EC=1.3.1.77 {ECO:0000269|PubMed:12532018, ECO:0000269|PubMed:14725861}; AltName: Full=Anthocyanin spotted testa; Short=ast; AltName: Full=Protein BANYULS;
Cluster-21800.5	22.93	27.78	14.17	0	0	0	-12.4422	6.56106e-19	ko03015: mRNA surveillance pathway	PAPS3_ARATH RecName: Full=Nuclear poly(A) polymerase 3 {ECO:0000303|PubMed:18479511}; Short=PAP(III) {ECO:0000305}; Short=Poly(A) polymerase III {ECO:0000305}; EC=2.7.7.19 {ECO:0000269|PubMed:15297145}; AltName: Full=Polynucleotide adenylyltransferase 3 {ECO:0000305};
Cluster-24749.0	29.33	25.77	16.06	0	0	0	-12.2131	6.69734e-19	ko04075: Plant hormone signal transduction	SAU36_ARATH RecName: Full=Auxin-responsive protein SAUR36 {ECO:0000305}; AltName: Full=Protein RESPONSE TO AUXINS AND GIBBERELLINS 1 {ECO:0000303|PubMed:23503980}; AltName: Full=Protein SENESCENCE-ASSOCIATED GENE 201 {ECO:0000305}; AltName: Full=Protein SMALL AUXIN UP RNA 36 {ECO:0000303|PubMed:12036261};
Cluster-29323.0	8.87	10.1	6.6	0	0	0	-12.0955	6.69734e-19	ko03040: Spliceosome	DEAH5_ARATH RecName: Full=Probable pre-mRNA-splicing factor ATP-dependent RNA helicase DEAH5 {ECO:0000305}; EC=3.6.4.13; AltName: Full=DEAH RNA helicase homolog PRP22 {ECO:0000303|PubMed:17008405};
Cluster-25202.2	11.05	9.52	14.27	0	0	0	-11.7333	6.75807e-19	ko03040: Spliceosome	U2AFB_ARATH RecName: Full=Splicing factor U2af small subunit B; AltName: Full=U2 auxiliary factor 35 kDa subunit B; AltName: Full=U2 small nuclear ribonucleoprotein auxiliary factor small subunit B; Short=U2 snRNP auxiliary factor small subunit B; AltName: Full=Zinc finger CCCH domain-containing protein 60; Short=AtC3H60;
Cluster-28845.3	6.84	5.51	4.71	0	0	0	-11.8236	6.84084e-19	--	B2_DAUCA RecName: Full=B2 protein;
Cluster-25764.0	19.55	17.33	24.26	0	0	0	-11.6762	6.93316e-19	--	JGB_ARATH RecName: Full=Protein JINGUBANG {ECO:0000303|PubMed:27468890};
Cluster-25186.0	4.05	3.72	4.37	20.88	17.37	15.07	2.24613	8.07002e-19	--	FRA15_FRAAN RecName: Full=Major strawberry allergen Fra a 1.05 {ECO:0000305}; AltName: Full=Class 10 plant pathogenesis-related protein Fra a 1.05 {ECO:0000305}; Short=PR10-related protein Fra a 1.05 {ECO:0000305}; EC=3.1.27.- {ECO:0000269|PubMed:30572279}; AltName: Allergen=Fra a 1 {ECO:0000305};
Cluster-25603.5	4.82	5.21	8.03	0	0	0	-11.9553	9.17681e-19	--	HHP2_ARATH RecName: Full=Heptahelical transmembrane protein 2; AltName: Full=PAQR family protein HHP2;
Cluster-9120.0	1.16	1.45	2.65	57.14	132.78	52.83	5.66857	1.04158e-18	--	--
Cluster-29250.1	59.19	34.82	18.91	0	0	0	-12.7897	1.12778e-18	ko03050: Proteasome	PSB5B_ARATH RecName: Full=Proteasome subunit beta type-5-B; EC=3.4.25.1; AltName: Full=20S proteasome beta subunit E-2; AltName: Full=Proteasome epsilon-2 chain; Flags: Precursor;
Cluster-14488.12	2562	3996.96	3830.21	89.92	189.17	90.83	-4.82095	1.14057e-18	ko04141: Protein processing in endoplasmic reticulum	HSP16_SOYBN RecName: Full=18.5 kDa class I heat shock protein; AltName: Full=HSP 18.5;
Cluster-19364.0	18.82	11.23	8.58	0.09	0	0.11	-7.37458	1.15319e-18	ko00073: Cutin, suberine and wax biosynthesis	WSD5_ARATH RecName: Full=Wax ester synthase/diacylglycerol acyltransferase 5 {ECO:0000303|PubMed:18621978}; Short=WS/DGAT 5 {ECO:0000303|PubMed:18621978}; AltName: Full=Diacylglycerol O-acyltransferase WSD5 {ECO:0000303|PubMed:18621978}; EC=2.3.1.20 {ECO:0000250|UniProtKB:Q93ZR6}; AltName: Full=Long-chain-alcohol O-fatty-acyltransferase WSD5 {ECO:0000303|PubMed:18621978}; EC=2.3.1.75 {ECO:0000250…
Cluster-23764.2	4.09	3.81	5.33	0.34	0.2	0.36	-3.7649	1.16891e-18	--	--
Cluster-27379.1	82.75	60.98	184.19	0	0	0	-12.6844	1.19489e-18	--	--
Cluster-27871.2	13.71	14.2	6.12	0	0	0	-12.6367	1.22877e-18	--	P2C42_ARATH RecName: Full=Probable protein phosphatase 2C 42; Short=AtPP2C42; EC=3.1.3.16;
Cluster-14112.0	43.25	76.77	91.74	1.85	2.26	0.78	-5.32069	1.33603e-18	--	BNM2A_BRANA RecName: Full=BURP domain-containing protein BNM2A {ECO:0000303|PubMed:19714473}; AltName: Full=Brassica napus microspore-derived embryo protein 2 {ECO:0000303|PubMed:9790599}; Short=BNM2 {ECO:0000303|PubMed:9790599}; Flags: Precursor;
Cluster-27360.1	30.76	30.5	23.78	0	0	0	-11.7744	1.39462e-18	--	CLPP5_ARATH RecName: Full=ATP-dependent Clp protease proteolytic subunit 5, chloroplastic {ECO:0000303|PubMed:11299370}; EC=3.4.21.92; AltName: Full=Endopeptidase ClpP5 {ECO:0000303|PubMed:11299370}; Short=nClpP5; AltName: Full=nClpP1; Flags: Precursor;
Cluster-26661.7	6.89	18.1	14.04	0	0	0	-12.8184	1.45479e-18	--	MUC21_ARATH RecName: Full=Xylan glycosyltransferase MUCI21 {ECO:0000305}; EC=2.4.-.- {ECO:0000305|PubMed:26482889}; AltName: Full=Protein MUCILAGE-MODIFIED 5 {ECO:0000303|PubMed:11706181}; AltName: Full=Protein MUCILAGE-RELATED 21 {ECO:0000303|PubMed:26482889}; AltName: Full=Putative xylan xylosyltransgerase MUCI21 {ECO:0000303|PubMed:26979331};
Cluster-18643.0	11.27	9.25	8.53	0	0	0	-11.603	1.91729e-18	--	--
Cluster-22508.1	3.15	0.98	3.78	61.74	58.72	80.99	4.86472	1.97867e-18	--	NO93_SOYBN RecName: Full=Early nodulin-93; Short=N-93;
Cluster-28487.6	508.76	1062.64	223.64	0.79	0.01	0.49	-10.4209	2.13075e-18	--	ADS3_ARATH RecName: Full=Palmitoyl-monogalactosyldiacylglycerol delta-7 desaturase, chloroplastic {ECO:0000303|PubMed:15579662}; EC=1.14.19.42 {ECO:0000269|PubMed:15579662}; AltName: Full=Acyl-lipid desaturase 3 {ECO:0000303|PubMed:15240892}; AltName: Full=Fatty acid desaturase 5 {ECO:0000303|PubMed:15579662}; Short=FAD5 {ECO:0000303|PubMed:15579662}; AltName: Full=Fatty acid desaturase B {ECO:00…
Cluster-28670.7	13.51	32.12	18.92	0	0	0	-12.7042	2.13075e-18	--	OBL1_ARATH RecName: Full=Triacylglycerol lipase OBL1 {ECO:0000305}; EC=3.1.1.- {ECO:0000269|PubMed:29178188}; AltName: Full=Oil body lipase 1 {ECO:0000303|PubMed:29178188}; Short=AtOBL1 {ECO:0000303|PubMed:29178188};
Cluster-17588.1	33.23	26.64	20.07	1.77	2.63	2.47	-3.41143	2.27274e-18	ko00195: Photosynthesis; ko01100: Metabolic pathways	PSAL_CUCSA RecName: Full=Photosystem I reaction center subunit XI, chloroplastic; Short=PSI-L; AltName: Full=PSI subunit V; Flags: Precursor;
Cluster-43037.1	2127.08	1836.3	3782	101.52	297.41	108.66	-4.72225	2.43243e-18	ko04141: Protein processing in endoplasmic reticulum	HSP21_SOLPE RecName: Full=17.3 kDa class II heat shock protein; AltName: Full=Hsp17.3; AltName: Full=Hsp20.2;
Cluster-24281.8	86.43	70.01	107.95	339.03	346.81	435.96	2.22977	2.58608e-18	ko00020: Citrate cycle (TCA cycle); ko01100: Metabolic pathways; ko01110: Biosynthesis of secondary metabolites	ACLA1_ARATH RecName: Full=ATP-citrate synthase alpha chain protein 1; Short=ATP-citrate synthase A-1; EC=2.3.3.8; AltName: Full=ATP-citrate lyase A-1; AltName: Full=Citrate cleavage enzyme A-1;
Cluster-28718.54	7.75	0.16	0.97	35.4	60.86	63.52	5.99433	2.71741e-18	--	FRS3_ARATH RecName: Full=Protein FAR1-RELATED SEQUENCE 3;
Cluster-25414.1	13.86	17.26	11.3	0	0	0	-11.9288	3.12379e-18	ko00900: Terpenoid backbone biosynthesis; ko01100: Metabolic pathways; ko01110: Biosynthesis of secondary metabolites	HMDH1_HEVBR RecName: Full=3-hydroxy-3-methylglutaryl-coenzyme A reductase 1; Short=HMG-CoA reductase 1; EC=1.1.1.34;
Cluster-12960.1	31.02	54.84	26.4	0	0	0	-12.4882	3.39141e-18	--	--
Cluster-17682.4	9.76	10.22	3.89	0	0	0	-12.6975	3.403e-18	ko03420: Nucleotide excision repair	UVH3_ARATH RecName: Full=DNA repair protein UVH3; EC=3.1.-.-; AltName: Full=ERCC5 homolog; AltName: Full=RAD2 homolog; Short=AtRAD2; Short=AtUVH3; Short=AtXPG; AltName: Full=UV hypersensitive protein 3; AltName: Full=XPG homolog;
Cluster-10080.0	44.09	49.59	26.33	0	0	0	-12.1622	3.48664e-18	--	MIP1B_ARATH RecName: Full=B-box domain protein 31 {ECO:0000303|PubMed:19920209}; Short=AtBBX31 {ECO:0000303|PubMed:19920209}; AltName: Full=Microprotein 1B {ECO:0000303|PubMed:27015278};
Cluster-22974.3	5.2	7.51	6.7	0.17	0.04	0.11	-5.90146	3.48664e-18	ko00053: Ascorbate and aldarate metabolism; ko01100: Metabolic pathways; ko01110: Biosynthesis of secondary metabolites; ko01240: Biosynthesis of cofactors	LPR1_ARATH RecName: Full=Multicopper oxidase LPR1; EC=1.-.-.-; AltName: Full=Protein LOW PHOSPHATE ROOT 1; Flags: Precursor;
Cluster-27830.0	33.36	24.47	36.3	96.23	99.97	89.77	1.74105	3.63767e-18	--	RER1B_ARATH RecName: Full=Protein RER1B; Short=AtRER1B;
Cluster-20666.3	23.95	29.73	19.04	0	0	0	-11.9158	4.0231e-18	--	HVA22_HORVU RecName: Full=Protein HVA22;
Cluster-28898.5	12.14	44.53	35.36	0	0	0	-13.2164	4.02901e-18	--	EXLA3_ARATH RecName: Full=Expansin-like A3; Short=At-EXPL3; Short=AtEXLA3; Short=AtEXPL3; AltName: Full=Ath-ExpBeta-2.3; Flags: Precursor;
Cluster-4448.7	1.97	2.42	2.97	30.29	79.49	50.61	4.58564	4.07324e-18	--	ACMAT_VITLA RecName: Full=Methanol O-anthraniloyltransferase; EC=2.3.1.232; AltName: Full=Anthraniloyl-CoA:methanol acyltransferase; AltName: Full=Benzyl alcohol O-benzoyltransferase; EC=2.3.1.196;
Cluster-27728.0	18.47	18.72	18.23	3.15	3.86	2.97	-2.34785	4.07324e-18	ko04075: Plant hormone signal transduction	TMKL1_ARATH RecName: Full=Putative kinase-like protein TMKL1; Flags: Precursor;
Cluster-28874.0	6.82	3.91	8.63	0	0	0	-11.8548	4.6096e-18	--	C3H38_ARATH RecName: Full=Zinc finger CCCH domain-containing protein 38; Short=AtC3H38;
Cluster-30117.0	11.4	6.2	9.25	45.39	56.77	46.29	2.62891	4.71667e-18	--	LUL4_ARATH RecName: Full=Probable E3 ubiquitin-protein ligase LUL4; EC=2.3.2.27; AltName: Full=Probable RING-type E3 ubiquitin transferase LUL4 {ECO:0000305}; AltName: Full=Protein LOG2-LIKE UBIQUITIN LIGASE 4; AltName: Full=RING finger protein 208;
Cluster-17307.3	17.49	15.15	17.42	2.67	2.27	3.03	-2.52594	4.96214e-18	--	STRK1_ORYSI RecName: Full=Salt tolerance receptor-like cytoplasmic kinase 1 {ECO:0000305}; EC=2.7.12.1 {ECO:0000250|UniProtKB:Q7XR88}; AltName: Full=Receptor-like cytoplasmic kinase 154 {ECO:0000305}; Short=OsRLCK154 {ECO:0000305};
Cluster-22915.0	6.84	4.57	6.85	0	0	0	-11.4419	4.98344e-18	--	--
Cluster-16979.1	4.78	4.09	6.91	0	0	0	-11.6254	5.20854e-18	ko00260: Glycine, serine and threonine metabolism; ko00310: Lysine degradation; ko01100: Metabolic pathways; ko04146: Peroxisome	SOX_ARATH RecName: Full=Probable sarcosine oxidase; EC=1.5.3.1;
Cluster-19359.4	7.46	8.02	9.24	0	0	0	-11.4735	5.20896e-18	--	ASI1_ARATH RecName: Full=Protein ANTI-SILENCING 1 {ECO:0000303|PubMed:24003136}; AltName: Full=Protein INCREASE IN BONSAI METHYLATION 2 {ECO:0000303|PubMed:23934508}; AltName: Full=Protein SHOOT GROWTH 1 {ECO:0000303|PubMed:24404182};
Cluster-15408.6	0	0	0.12	13.25	22.91	19.95	9.22042	5.65063e-18	ko00040: Pentose and glucuronate interconversions; ko00051: Fructose and mannose metabolism; ko01100: Metabolic pathways	IDND_VITVI RecName: Full=L-idonate 5-dehydrogenase; EC=1.1.1.366;
Cluster-11040.0	265.78	233.19	220.36	851.49	1656.78	1424.01	2.37145	5.72626e-18	ko00040: Pentose and glucuronate interconversions; ko00053: Ascorbate and aldarate metabolism; ko00520: Amino sugar and nucleotide sugar metabolism; ko01100: Metabolic pathways; ko01240: Biosynthesis of cofactors; ko01250: Biosynthesis of nucleotide sugars	UGDH1_SOYBN RecName: Full=UDP-glucose 6-dehydrogenase 1; Short=UDP-Glc dehydrogenase 1; Short=UDP-GlcDH 1; Short=UDPGDH 1; EC=1.1.1.22; AltName: Full=Gm-UGD1;
Cluster-28503.5	0	0	0	6.51	4.36	2.61	12.1993	6.16275e-18	ko02010: ABC transporters	AB2C_ARATH RecName: Full=ABC transporter C family member 2; Short=ABC transporter ABCC.2; Short=AtABCC2; EC=7.6.2.2; AltName: Full=ATP-energized glutathione S-conjugate pump 2; AltName: Full=Glutathione S-conjugate-transporting ATPase 2; AltName: Full=Multidrug resistance-associated protein 2;
Cluster-28666.0	76.22	77.31	69.3	476.2	222.69	473.45	2.46828	6.24496e-18	--	ZPR1_ARATH RecName: Full=Protein LITTLE ZIPPER 1 {ECO:0000303|PubMed:18055602};
Cluster-22287.6	9.16	8.36	9.68	0	0	0	-11.3303	6.26725e-18	--	SIS3_ARATH RecName: Full=E3 ubiquitin-protein ligase SIS3; EC=2.3.2.27; AltName: Full=Protein SUGAR INSENSITIVE 3; AltName: Full=RING-type E3 ubiquitin transferase SIS3 {ECO:0000305}; Flags: Precursor;
Cluster-19924.2	0.05	0.08	0	30.66	9.21	20.2	8.99619	6.35445e-18	ko03050: Proteasome	PSD8A_ARATH RecName: Full=26S proteasome non-ATPase regulatory subunit 8 homolog A; AltName: Full=26S proteasome regulatory subunit RPN12a {ECO:0000303|PubMed:14623884}; Short=AtRPN12a {ECO:0000303|PubMed:14623884}; AltName: Full=26S proteasome regulatory subunit S14 homolog A;
Cluster-29332.1	6.24	4.96	5.6	0	0	0	-11.3123	6.78447e-18	--	CXE18_ARATH RecName: Full=Probable carboxylesterase 18; AltName: Full=AtCXE18; EC=3.1.1.1;
Cluster-19056.1	3075.15	625.03	1705.56	5.06	21.58	10.06	-7.0191	6.93424e-18	--	DEF19_ARATH RecName: Full=Defensin-like protein 19; AltName: Full=Defensin AMP1 protein; AltName: Full=Low-molecular-weight cysteine-rich protein 78; Short=Protein LCR78; AltName: Full=Plant defensin 1.4; Flags: Precursor;
Cluster-9117.0	4.3	3.77	3.23	0.02	0.02	0.07	-6.63612	6.97474e-18	ko00460: Cyanoamino acid metabolism; ko00500: Starch and sucrose metabolism; ko00999: Biosynthesis of various plant secondary metabolites; ko01100: Metabolic pathways; ko01110: Biosynthesis of secondary metabolites	--
Cluster-14340.3	0	0	0	421.94	1721.93	715.97	13.3558	7.0384e-18	ko03013: Nucleocytoplasmic transport	EF1A_MAIZE RecName: Full=Elongation factor 1-alpha; Short=EF-1-alpha;
Cluster-28831.0	12.46	12.59	18.47	110.9	75.4	113.81	2.91583	7.13124e-18	--	--
Cluster-11391.11	0.84	0.5	1.42	21.59	18.54	13.13	4.45908	7.1587e-18	ko00270: Cysteine and methionine metabolism; ko01100: Metabolic pathways; ko01110: Biosynthesis of secondary metabolites	HMT1_BRAOT RecName: Full=Homocysteine S-methyltransferase 1; Short=BoHMT1; EC=2.1.1.10;
Cluster-27253.0	4.09	2.3	2.45	30.36	19.2	26.41	3.25194	7.17672e-18	--	DRIP2_ARATH RecName: Full=E3 ubiquitin protein ligase DRIP2; EC=2.3.2.27 {ECO:0000269|PubMed:18552202}; AltName: Full=DREB2A-interacting protein 2; AltName: Full=RING-type E3 ubiquitin transferase DRIP2 {ECO:0000305};
Cluster-14383.3	0.05	0	0	21.63	15.68	23.5	11.3954	7.43914e-18	--	POLX_TOBAC RecName: Full=Retrovirus-related Pol polyprotein from transposon TNT 1-94; Includes: RecName: Full=Protease; EC=3.4.23.-; Includes: RecName: Full=Reverse transcriptase; EC=2.7.7.49; Includes: RecName: Full=Endonuclease;
Cluster-24196.0	12.18	8.94	14.71	63.62	93.44	61.86	2.8418	7.74448e-18	--	--
Cluster-26817.2	23.37	10.31	27.1	0	0	0	-12.0509	8.36232e-18	--	--
Cluster-3065.0	27.51	9.84	25.87	0.58	0.91	0.46	-4.84474	8.94229e-18	--	PTR14_ARATH RecName: Full=Protein NRT1/ PTR FAMILY 7.3; Short=AtNPF7.3; AltName: Full=Nitrate transporter 1.5;
Cluster-27873.1	9.39	9.07	4.39	0	0	0	-12.206	9.10458e-18	--	SSC14_ARATH RecName: Full=Sister chromatid cohesion 1 protein 4; Short=AtRAD21-3; Short=AtRAD21.3;
Cluster-30919.0	197.52	149.28	185.78	375.05	406.93	380.63	1.26619	9.53874e-18	--	RBP1C_ARATH RecName: Full=Ran-binding protein 1 homolog c;
Cluster-25737.0	12.2	38.97	14.18	0	0	0	-13.2534	1.04581e-17	--	P2C63_ARATH RecName: Full=Probable protein phosphatase 2C 63; Short=AtPP2C63; EC=3.1.3.16;
Cluster-43037.0	36.47	968.65	449.29	0	0	0	-16.2263	1.07645e-17	ko04141: Protein processing in endoplasmic reticulum	HSP21_SOLPE RecName: Full=17.3 kDa class II heat shock protein; AltName: Full=Hsp17.3; AltName: Full=Hsp20.2;
Cluster-29910.0	118.83	93.57	106.7	414.59	601.21	612.86	2.28827	1.12215e-17	ko00360: Phenylalanine metabolism; ko00940: Phenylpropanoid biosynthesis; ko01100: Metabolic pathways; ko01110: Biosynthesis of secondary metabolites	PALY_POPTR RecName: Full=Phenylalanine ammonia-lyase; EC=4.3.1.24;
Cluster-28248.0	35.66	29.7	30.13	83.95	89.75	83.87	1.56259	1.12575e-17	ko03018: RNA degradation	CAF1G_ARATH RecName: Full=Probable CCR4-associated factor 1 homolog 7; EC=3.1.13.4;
Cluster-21122.5	11.48	9.31	7.85	0	0	0	-11.4848	1.13586e-17	--	--
Cluster-19125.0	0.83	0.77	0.46	11.62	8.09	11.92	4.11499	1.14972e-17	--	SLP2_ARATH RecName: Full=Shewanella-like protein phosphatase 2 {ECO:0000303|PubMed:21976480}; Short=AtSLP2 {ECO:0000303|PubMed:21976480}; EC=3.1.-.- {ECO:0000305};
Cluster-19439.5	0	0	0	3.68	3.88	4.47	11.3027	1.155e-17	--	PPR88_ARATH RecName: Full=Pentatricopeptide repeat-containing protein At1g62260, mitochondrial; Flags: Precursor;
Cluster-29548.5	14.08	10.25	11.71	0	0	0	-11.2789	1.21192e-17	--	Y1461_ARATH RecName: Full=Probable serine/threonine-protein kinase At1g54610; EC=2.7.11.1;
Cluster-22450.0	5	4.69	5.89	32.52	55.06	37.71	3.13751	1.26478e-17	--	GRXC6_ORYSJ RecName: Full=Glutaredoxin-C6; AltName: Full=Glutaredoxin-C2 homolog 1;
Cluster-3779.10	27	32.93	46.57	0	0	0	-11.6551	1.2713e-17	--	--
Cluster-3204.1	7.2	5.07	6.02	0.78	0.44	0.43	-3.34639	1.27172e-17	--	GMI1_ARATH RecName: Full=Structural maintenance of chromosomes flexible hinge domain-containing protein GMI1 {ECO:0000305}; Short=SMC hinge domain-containing protein GMI1 {ECO:0000305}; AltName: Full=Protein GAMMA-IRRADIATION AND MITOMYCIN C INDUCED 1 {ECO:0000303|PubMed:21481027};
Cluster-26905.1	0.2	0.18	0.33	6.67	9.62	4.84	5.13393	1.28206e-17	ko04626: Plant-pathogen interaction	CDPKW_ARATH RecName: Full=Calcium-dependent protein kinase 32 {ECO:0000303|Ref.5}; EC=2.7.11.1 {ECO:0000305};
Cluster-16248.0	38.51	98.21	74.42	0	0	0	-12.4441	1.28994e-17	--	JI23_HORVU RecName: Full=23 kDa jasmonate-induced protein;
Cluster-28527.1	4.89	5.88	4.89	0	0	0	-11.512	1.29195e-17	--	IPCS1_ARATH RecName: Full=Phosphatidylinositol:ceramide inositolphosphotransferase 1; EC=2.7.8.-; AltName: Full=Inositol-phosphorylceramide synthase 1; Short=AtIPCS1; Short=IPC synthase 1; AltName: Full=Protein ERH1-like2; AltName: Full=Sphingolipid synthase 1;
Cluster-24225.2	0	0	0	9.88	4	5.41	12.1264	1.36026e-17	ko00196: Photosynthesis - antenna proteins; ko01100: Metabolic pathways	CB12_SOLLC RecName: Full=Chlorophyll a-b binding protein 7, chloroplastic; AltName: Full=LHCI type II CAB-7; Flags: Precursor;
Cluster-23648.6	0	0.17	0	17.58	29.17	22.1	9.11736	1.39536e-17	--	DSLE_ARATH RecName: Full=Zinc finger BED domain-containing protein DAYSLEEPER; AltName: Full=Transposase-like protein DAYSLEEPER;
Cluster-27921.8	3.73	11.14	4.26	0	0	0	-13.0579	1.56719e-17	ko00250: Alanine, aspartate and glutamate metabolism; ko00910: Nitrogen metabolism; ko01100: Metabolic pathways; ko01110: Biosynthesis of secondary metabolites; ko01230: Biosynthesis of amino acids	GLUT1_ARATH RecName: Full=Glutamate synthase 1 [NADH], chloroplastic; EC=1.4.1.14; AltName: Full=NADH-dependent glutamate synthase 1; Short=NADH-GOGAT 1; Flags: Precursor;
Cluster-29275.0	12.07	9.63	8.88	0	0	0	-11.3515	1.59097e-17	--	--
Cluster-28993.0	1.11	0.77	2.42	28.25	32.52	43.99	4.75968	1.59097e-17	--	BH151_ARATH RecName: Full=Transcription factor UPBEAT1; AltName: Full=Basic helix-loop-helix protein 151; Short=AtbHLH151; Short=bHLH 151; AltName: Full=Transcription factor EN 146; AltName: Full=Transcription factor bHLH151; AltName: Full=bHLH transcription factor bHLH151;
Cluster-29330.4	14.12	11.85	13.76	40.61	50.37	54.26	2.0084	1.61353e-17	ko03040: Spliceosome	SR34_ARATH RecName: Full=Serine/arginine-rich-splicing factor SR34; Short=At-SR34; Short=At-SRp34; Short=AtSR34; AltName: Full=Pre-mRNA-splicing factor SF2; AltName: Full=SR1 protein;
Cluster-29323.1	4.81	4.39	4.56	0	0	0	-11.2287	1.61353e-17	ko03040: Spliceosome	DEAH5_ARATH RecName: Full=Probable pre-mRNA-splicing factor ATP-dependent RNA helicase DEAH5 {ECO:0000305}; EC=3.6.4.13; AltName: Full=DEAH RNA helicase homolog PRP22 {ECO:0000303|PubMed:17008405};
Cluster-26067.1	138.02	138.98	151.09	443.57	539.72	471.43	1.88873	1.7519e-17	--	1433_PEA RecName: Full=14-3-3-like protein;
Cluster-29052.1	29.33	17.53	24.62	0	0	0	-11.3489	1.77131e-17	--	GILT_ARATH RecName: Full=Gamma-interferon-responsive lysosomal thiol protein {ECO:0000303|PubMed:21052676}; Short=AtGILT {ECO:0000303|PubMed:21052676}; Flags: Precursor;
Cluster-19467.7	43.25	55.39	27.53	0	0	0	-12.0329	1.90583e-17	--	FLK_ARATH RecName: Full=Flowering locus K homology domain {ECO:0000303|PubMed:14593172}; Short=Flowering locus KH domain {ECO:0000303|PubMed:14593172};
Cluster-19975.5	1.41	0.49	0.63	13.58	12.27	12.26	4.08745	1.91689e-17	--	CSPL3_SOYBN RecName: Full=CASP-like protein 2C1; Short=GmCASPL2C1;
Cluster-24537.0	25.09	18.2	29.91	4.73	3.28	3.55	-2.57173	1.91689e-17	ko04075: Plant hormone signal transduction	SCL15_ARATH RecName: Full=Scarecrow-like protein 15; Short=AtSCL15; AltName: Full=GRAS family protein 25; Short=AtGRAS-25;
Cluster-13666.1	43.36	173.17	139.03	0	0	0	-13.0962	1.9189e-17	ko00260: Glycine, serine and threonine metabolism; ko01100: Metabolic pathways	BADH2_ARATH RecName: Full=Betaine aldehyde dehydrogenase 2, mitochondrial; Short=BADH; EC=1.2.1.8; AltName: Full=Aldehyde dehydrogenase family 10 member A9; Flags: Precursor;
Cluster-25491.0	3.27	1.6	1.82	29.43	21.32	38.5	3.88927	2.18197e-17	ko00908: Zeatin biosynthesis; ko01100: Metabolic pathways; ko01110: Biosynthesis of secondary metabolites	IPT5_ARATH RecName: Full=Adenylate isopentenyltransferase 5, chloroplastic; Short=AtIPT5; EC=2.5.1.112; AltName: Full=Adenylate dimethylallyltransferase 5; AltName: Full=Cytokinin synthase 5; Flags: Precursor;
Cluster-13859.0	21.59	11.88	19.25	0	0	0	-11.3989	2.40691e-17	ko00230: Purine metabolism; ko00232: Caffeine metabolism; ko01100: Metabolic pathways	URIC1_CANLI RecName: Full=Uricase-2 isozyme 1; EC=1.7.3.3; AltName: Full=Urate oxidase; AltName: Full=Uricase II clone pcClNUO-01;
Cluster-20211.1	10.54	12.43	9.14	0	0	0	-11.511	2.48875e-17	--	--
Cluster-19162.0	194.06	134.03	73.91	5.84	5.08	3.39	-4.71072	2.53672e-17	ko00190: Oxidative phosphorylation; ko01100: Metabolic pathways	QCR7_SOLTU RecName: Full=Cytochrome b-c1 complex subunit 7; AltName: Full=CR14; AltName: Full=Complex III subunit 7; AltName: Full=Complex III subunit VII; AltName: Full=Ubiquinol-cytochrome c reductase complex 14 kDa protein;
Cluster-12154.2	16.62	21.56	24.31	1.79	0.93	1.48	-3.76158	2.54339e-17	--	FB30_ARATH RecName: Full=Putative F-box protein At1g32420;
Cluster-21010.6	0	0	0	5.16	9.65	7.12	11.6671	2.58884e-17	--	ABI3_ARATH RecName: Full=B3 domain-containing transcription factor ABI3; AltName: Full=Protein ABSCISIC ACID-INSENSITIVE 3;
Cluster-28431.7	773.11	635.56	712.04	1508.23	1652.1	1700.68	1.34078	2.66775e-17	ko00010: Glycolysis / Gluconeogenesis; ko00030: Pentose phosphate pathway; ko00051: Fructose and mannose metabolism; ko00710: Carbon fixation in photosynthetic organisms; ko01100: Metabolic pathways; ko01110: Biosynthesis of secondary metabolites; ko01200: Carbon metabolism; ko01230: Biosynthesis of amino acids	ALFC6_ARATH RecName: Full=Fructose-bisphosphate aldolase 6, cytosolic {ECO:0000305}; Short=AtFBA6 {ECO:0000303|PubMed:22561114}; EC=4.1.2.13 {ECO:0000269|PubMed:21782461}; AltName: Full=Cytosolic aldolase 2 {ECO:0000303|PubMed:21782461}; Short=cAld2 {ECO:0000303|PubMed:21782461};
Cluster-89385.0	0.36	0.46	0.37	10.32	4.48	5.7	4.21302	2.75111e-17	--	POLR1_ARATH RecName: Full=Retrovirus-related Pol polyprotein from transposon RE1; AltName: Full=Retro element 1 {ECO:0000303|PubMed:10689195}; Short=AtRE1 {ECO:0000303|PubMed:10689195}; Includes: RecName: Full=Protease RE1; EC=3.4.23.-; Includes: RecName: Full=Reverse transcriptase RE1; EC=2.7.7.49; Includes: RecName: Full=Endonuclease RE1;
Cluster-25364.4	8.31	11.19	8.07	0	0	0	-11.5922	2.84263e-17	--	RCF3_ARATH RecName: Full=RNA-binding KH domain-containing protein RCF3 {ECO:0000305|PubMed:23087326}; AltName: Full=Protein ENHANCED STRESS RESPONSE 1 {ECO:0000303|PubMed:25985302}; AltName: Full=Protein HIGH OSMOTIC STRESS GENE EXPRESSION 5 {ECO:0000303|PubMed:24146632}; AltName: Full=Protein REGULATOR OF CBF GENE EXPRESSION 3 {ECO:0000303|PubMed:23087326}; AltName: Full=Protein SHINY 1 {ECO:000…
Cluster-25467.2	8.78	5.94	9.66	0	0	0	-11.2743	2.88622e-17	--	--
Cluster-22541.5	9.02	12.35	10.45	0	0	0	-11.503	3.06158e-17	--	SPPA1_ARATH RecName: Full=Serine protease SPPA, chloroplastic; EC=3.4.21.-; AltName: Full=Signal peptide peptidase SPPA; Flags: Precursor;
Cluster-11760.4	3.68	2.8	5.26	0	0	0	-11.4509	3.31007e-17	ko00562: Inositol phosphate metabolism; ko01100: Metabolic pathways	ACR4_ARATH RecName: Full=ACT domain-containing protein ACR4 {ECO:0000305}; AltName: Full=Protein ACT DOMAIN REPEATS 4 {ECO:0000303|PubMed:12481063};
Cluster-23011.3	3.51	2.31	2.57	0	0	0	-11.253	3.3322e-17	ko04120: Ubiquitin mediated proteolysis	CDC22_ARATH RecName: Full=Cell division cycle 20.2, cofactor of APC complex; Short=AtCDC20.2;
Cluster-10465.0	7.45	5.81	6.98	1.71	1.96	1.69	-1.77982	3.40195e-17	ko02010: ABC transporters	AB19B_ARATH RecName: Full=ABC transporter B family member 19; Short=ABC transporter ABCB.19; Short=AtABCB19; AltName: Full=Multidrug resistance protein 11; AltName: Full=P-glycoprotein 19;
Cluster-23082.7	0.14	0.18	0	48.57	94.67	17.8	9.27609	3.54495e-17	ko03040: Spliceosome	GRP1_DAUCA RecName: Full=Glycine-rich RNA-binding protein;
Cluster-26021.3	17.4	8.14	19.54	0	0	0	-11.716	3.73564e-17	--	PTP1_ARATH RecName: Full=Protein-tyrosine-phosphatase PTP1; EC=3.1.3.48; AltName: Full=Protein tyrosine phosphatase 1; Short=AtPTP1;
Cluster-3755.0	6.62	4.47	9.63	0	0	0	-11.5688	3.97248e-17	--	--
Cluster-19148.3	168.56	50.77	87.41	0.24	0	0	-10.0084	4.13804e-17	--	SRC2_SOYBN RecName: Full=Protein SRC2 {ECO:0000305}; AltName: Full=Protein SOYBEAN GENE REGULATED BY COLD 2 {ECO:0000303|Ref.1};
Cluster-22287.4	0	0	0	7.15	8.3	7.13	11.1234	4.33782e-17	--	SIS3_ARATH RecName: Full=E3 ubiquitin-protein ligase SIS3; EC=2.3.2.27; AltName: Full=Protein SUGAR INSENSITIVE 3; AltName: Full=RING-type E3 ubiquitin transferase SIS3 {ECO:0000305}; Flags: Precursor;
Cluster-20437.6	3.38	4.11	6.52	0	0	0	-11.6423	4.35739e-17	--	GACP2_ARATH RecName: Full=Gamma-tubulin complex component 2; Short=AtGCP2; Short=GCP-2; AltName: Full=Protein SPIRAL 3; AltName: Full=Spindle pole body protein Spc97 homolog; Short=AtSpc97;
Cluster-29141.3	9.69	6.06	14.41	0	0	0	-11.676	4.35739e-17	ko00900: Terpenoid backbone biosynthesis; ko01100: Metabolic pathways; ko01110: Biosynthesis of secondary metabolites	HMDH_CAMAC RecName: Full=3-hydroxy-3-methylglutaryl-coenzyme A reductase; Short=HMG-CoA reductase; EC=1.1.1.34;
Cluster-28760.0	9.46	6.68	10.69	31.39	28.71	31.18	1.92151	4.65363e-17	--	VQ4_ARATH RecName: Full=VQ motif-containing protein 4 {ECO:0000303|PubMed:22535423}; Short=AtVQ4 {ECO:0000303|PubMed:22535423}; AltName: Full=MPK3/6-targeted VQ-motif-containing protein 1 {ECO:0000303|PubMed:24750137};
Cluster-16732.1	66.52	30.84	45.39	0	0	0	-11.5307	4.80904e-17	ko04130: SNARE interactions in vesicular transport	BET11_ARATH RecName: Full=Bet1-like SNARE 1-1; Short=AtBET11; AltName: Full=Bet1/Sft1-like SNARE 14a; Short=AtBS14a;
Cluster-23703.1	43.12	48.3	37.1	194.66	204.99	222.68	2.3916	5.2636e-17	ko00750: Vitamin B6 metabolism; ko01100: Metabolic pathways	AKR2_ORYSI RecName: Full=Probable aldo-keto reductase 2; EC=1.1.1.-;
Cluster-31764.0	81.87	63.13	123.31	507.43	462.7	565.77	2.66602	5.2636e-17	ko00360: Phenylalanine metabolism; ko00940: Phenylpropanoid biosynthesis; ko01100: Metabolic pathways; ko01110: Biosynthesis of secondary metabolites	PALY_CAMSI RecName: Full=Phenylalanine ammonia-lyase; EC=4.3.1.24;
Cluster-17416.0	18.85	28.69	29.48	0.16	0	0	-8.63862	5.80781e-17	ko04144: Endocytosis	VP282_ARATH RecName: Full=Vacuolar protein sorting-associated protein 28 homolog 2;
Cluster-34394.30	18.56	10.72	54.56	0	0	0	-13.0075	5.98993e-17	ko03040: Spliceosome; ko04141: Protein processing in endoplasmic reticulum; ko04144: Endocytosis	HS704_ARATH RecName: Full=Heat shock 70 kDa protein 4 {ECO:0000303|PubMed:11599561}; AltName: Full=Heat shock cognate 70 kDa protein 4 {ECO:0000303|PubMed:11402207}; AltName: Full=Heat shock cognate protein 70-4 {ECO:0000303|PubMed:11402207}; Short=AtHsc70-4 {ECO:0000303|PubMed:11402207}; AltName: Full=Heat shock protein 70-4 {ECO:0000303|PubMed:11599561}; Short=AtHsp70-4 {ECO:0000303|PubMed:1159…
Cluster-14488.15	2053.14	3513.94	3008.89	201.2	509.24	318.33	-4.35823	6.07628e-17	ko04141: Protein processing in endoplasmic reticulum	HSP16_SOYBN RecName: Full=18.5 kDa class I heat shock protein; AltName: Full=HSP 18.5;
Cluster-21243.2	4.77	3.34	4.95	0	0	0	-11.1082	6.24738e-17	ko00620: Pyruvate metabolism; ko00710: Carbon fixation in photosynthetic organisms; ko01100: Metabolic pathways; ko01200: Carbon metabolism	MAOM_SOLTU RecName: Full=NAD-dependent malic enzyme 62 kDa isoform, mitochondrial; Short=NAD-ME; EC=1.1.1.39; Flags: Precursor;
Cluster-14822.4	4.88	6.36	5.95	0	0	0	-11.3343	6.35884e-17	--	--
Cluster-43786.11	18.8	7.91	27.7	0.3	0.43	0.27	-5.66477	6.50048e-17	--	--
Cluster-29435.2	7.25	5.84	5.31	0	0	0	-11.1765	6.8106e-17	ko00340: Histidine metabolism; ko01100: Metabolic pathways; ko01110: Biosynthesis of secondary metabolites; ko01230: Biosynthesis of amino acids	HISX_ORYSJ RecName: Full=Histidinol dehydrogenase, chloroplastic; Short=HDH; EC=1.1.1.23; Flags: Precursor;
Cluster-14430.1	96.08	101.08	133.96	22.01	26.34	25.14	-2.12346	6.8106e-17	ko04141: Protein processing in endoplasmic reticulum; ko04626: Plant-pathogen interaction	HS905_ARATH RecName: Full=Heat shock protein 90-5, chloroplastic {ECO:0000305}; Short=AtHSP90.5 {ECO:0000305}; Short=AtHsp90-5 {ECO:0000303|PubMed:11599565}; AltName: Full=Heat shock protein 88-1 {ECO:0000305}; Short=Hsp88-1 {ECO:0000303|PubMed:11599565}; AltName: Full=Hsp90C {ECO:0000303|PubMed:23382192}; AltName: Full=Protein EMBRYO DEFECTIVE 1956 {ECO:0000303|PubMed:23382192}; AltName: Full=Pr…
Cluster-28407.4	6.42	2.75	4.47	0	0	0	-11.5389	7.23075e-17	ko00073: Cutin, suberine and wax biosynthesis	FPP7_ARATH RecName: Full=Filament-like plant protein 7; Short=AtFPP7;
Cluster-20323.6	12.94	10.67	10.82	0	0	0	-11.062	7.50539e-17	--	BRG3_ARATH RecName: Full=Probable BOI-related E3 ubiquitin-protein ligase 3; EC=2.3.2.27 {ECO:0000250|UniProtKB:Q9FHE4}; AltName: Full=RING-type E3 ubiquitin transferase BRG3 {ECO:0000305};
Cluster-10267.1	18.42	15.58	17.91	68.64	98.31	72.68	2.33013	8.05387e-17	--	--
Cluster-15074.4	0	0	0	22.73	30.79	15.66	11.559	8.19783e-17	--	TCTP_CUCMA RecName: Full=Translationally-controlled tumor protein homolog; Short=TCTP; AltName: Full=CmTCTP;
Cluster-28845.0	4.32	5.42	3.59	0	0	0	-11.4808	8.86104e-17	--	B2_DAUCA RecName: Full=B2 protein;
Cluster-24200.1	0.9	0.05	0.23	185.8	347.97	224.54	8.51575	9.21835e-17	--	--
Cluster-2218.1	18.86	13.52	15.41	83.88	136.5	166.69	3.16398	9.30027e-17	ko00460: Cyanoamino acid metabolism; ko00500: Starch and sucrose metabolism; ko00999: Biosynthesis of various plant secondary metabolites; ko01100: Metabolic pathways; ko01110: Biosynthesis of secondary metabolites	BGL40_ARATH RecName: Full=Beta-glucosidase 40; Short=AtBGLU40; EC=3.2.1.21; Flags: Precursor;
Cluster-2694.0	7.09	8.43	6.3	0	0	0	-11.3315	9.38185e-17	--	RS273_ARATH RecName: Full=40S ribosomal protein S27-3;
Cluster-25848.1	22.54	41.65	17.97	0.86	0.4	0.83	-5.32492	9.74356e-17	ko03018: RNA degradation	URT1_ARATH RecName: Full=UTP:RNA uridylyltransferase 1 {ECO:0000303|PubMed:23748567}; EC=2.7.7.52 {ECO:0000269|PubMed:23748567};
Cluster-20390.4	0.55	0.83	0.55	6.48	7.93	8.46	3.69779	1.04612e-16	--	--
Cluster-31890.0	0	0	0	87.95	14.16	61.27	13.1951	1.08055e-16	ko00940: Phenylpropanoid biosynthesis; ko01100: Metabolic pathways; ko01110: Biosynthesis of secondary metabolites	PER15_IPOBA RecName: Full=Peroxidase 15 {ECO:0000303|PubMed:17936696}; Short=Prx15 {ECO:0000303|PubMed:17936696}; EC=1.11.1.7; AltName: Full=Anionic peroxidase {ECO:0000303|PubMed:17936696}; Flags: Precursor;
Cluster-16761.1	169.06	34.86	68.65	0	0	0	-12.6751	1.20001e-16	--	CYT12_ORYSJ RecName: Full=Cysteine proteinase inhibitor 12; AltName: Full=Oryzacystatin XII; Short=OC-XII; AltName: Full=Oryzacystatin-12; Flags: Precursor;
Cluster-23242.6	12.47	12.47	12.25	49.27	64.87	51.01	2.28135	1.20905e-16	--	--
Cluster-12563.6	5.11	3.56	2.08	0	0	0	-11.8088	1.23415e-16	--	--
Cluster-14567.0	31.33	15.15	11.82	1.77	2.16	1.12	-5.86746	1.24747e-16	--	--
Cluster-21515.1	5.17	7.82	4.61	0	0	0	-11.6595	1.29366e-16	ko00040: Pentose and glucuronate interconversions; ko01100: Metabolic pathways	PME59_ARATH RecName: Full=Probable pectinesterase/pectinesterase inhibitor 59; Includes: RecName: Full=Pectinesterase inhibitor 59; AltName: Full=Pectin methylesterase inhibitor 59; Includes: RecName: Full=Pectinesterase 59; Short=PE 59; EC=3.1.1.11; AltName: Full=Pectin methylesterase 59; Short=AtPME59; Flags: Precursor;
Cluster-26913.0	8.39	5.86	6.94	45.73	83.22	75.24	3.4323	1.29802e-16	--	--
Cluster-29268.0	11.25	10.66	12.06	27.6	28.17	27.32	1.41632	1.37494e-16	ko03008: Ribosome biogenesis in eukaryotes	UTP18_ARATH RecName: Full=U3 small nucleolar RNA-associated protein 18 homolog;
Cluster-11461.0	15.14	29.73	19.83	0.11	0	0.21	-7.59928	1.4518e-16	--	--
Cluster-26381.2	3.68	5.4	5.75	0	0	0	-11.3834	1.53435e-16	--	OP24A_ARATH RecName: Full=Outer envelope pore protein 24A, chloroplastic; AltName: Full=Chloroplastic outer envelope pore protein of 24 kDa A;
Cluster-26276.9	9.79	7.13	9.21	0	0	0	-10.9393	1.56926e-16	--	NRAM6_ARATH RecName: Full=Metal transporter Nramp6; Short=AtNramp6;
Cluster-28009.2	5.95	6.52	7.2	0	0	0	-11.0506	1.59899e-16	--	XTHB_PHAAN RecName: Full=Probable xyloglucan endotransglucosylase/hydrolase protein B; EC=2.4.1.207; AltName: Full=VaXTH2; Flags: Precursor;
Cluster-28696.2	0	0	0	5.31	4.17	6.56	11.1647	1.82822e-16	ko03008: Ribosome biogenesis in eukaryotes	CD48C_ARATH RecName: Full=Cell division control protein 48 homolog C; Short=AtCDC48c; AltName: Full=Protein EMBRYO DEFECTIVE 1354;
Cluster-25124.0	0	0	0	6.96	9.07	8.28	11.0229	1.83532e-16	ko03040: Spliceosome	--
Cluster-29030.0	8.72	7.39	13.5	59.18	73.45	86.6	3.02099	2.03856e-16	--	MYB62_ARATH RecName: Full=Transcription factor MYB62 {ECO:0000303|PubMed:9839469}; AltName: Full=Myb-related protein 62 {ECO:0000303|PubMed:9839469}; Short=AtMYB62 {ECO:0000303|PubMed:9839469};
Cluster-30265.4	20.09	18.13	28.72	104.29	95.18	85.07	2.22833	2.04396e-16	--	CCP31_ORYSJ RecName: Full=Cyclin-P3-1; Short=CycP3;1;
Cluster-24879.8	24.92	28.79	19.6	0	0	0	-11.31	2.04582e-16	--	--
Cluster-28718.4	0	0	0	16.36	6.63	10.63	11.6908	2.0859e-16	--	SVR3_ARATH RecName: Full=Putative elongation factor TypA-like SVR3, chloroplastic; AltName: Full=Protein HAPPY ON NORFLURAZON 23 {ECO:0000303|PubMed:21208309}; AltName: Full=Protein SUPPRESSOR OF VARIEGATION 3 {ECO:0000303|PubMed:21187014}; Flags: Precursor;
Cluster-26087.3	17.22	15.96	18.16	61.16	47.53	64.4	1.88209	2.22228e-16	ko00520: Amino sugar and nucleotide sugar metabolism; ko01100: Metabolic pathways; ko01250: Biosynthesis of nucleotide sugars	RHM1_ARATH RecName: Full=Trifunctional UDP-glucose 4,6-dehydratase/UDP-4-keto-6-deoxy-D-glucose 3,5-epimerase/UDP-4-keto-L-rhamnose-reductase RHM1 {ECO:0000305|PubMed:17190829}; AltName: Full=Protein REPRESSOR OF LRX1 1 {ECO:0000303|PubMed:18567791}; AltName: Full=Rhamnose biosynthetic enzyme 1; Short=AtRHM1; Includes: RecName: Full=UDP-glucose 4,6-dehydratase {ECO:0000305|PubMed:17190829}; EC=4.…
Cluster-26276.7	0	0	0	7.87	11.98	9.13	11.154	2.22621e-16	--	NRAM6_ARATH RecName: Full=Metal transporter Nramp6; Short=AtNramp6;
Cluster-20406.5	2.53	2.53	2.74	0	0	0	-10.9362	2.3066e-16	--	--
Cluster-22696.3	4.18	8.38	7.45	0	0	0	-11.7132	2.3066e-16	--	UBP5_ARATH RecName: Full=Ubiquitin carboxyl-terminal hydrolase 5; EC=3.4.19.12; AltName: Full=Deubiquitinating enzyme 5; Short=AtUBP5; AltName: Full=Ubiquitin thioesterase 5; AltName: Full=Ubiquitin-specific-processing protease 5;
Cluster-7028.0	6.73	6.72	5.83	23.25	26.37	25.35	2.08057	2.41446e-16	--	FKB62_ARATH RecName: Full=Peptidyl-prolyl cis-trans isomerase FKBP62; Short=PPIase FKBP62; EC=5.2.1.8; AltName: Full=70 kDa peptidyl-prolyl isomerase; AltName: Full=FK506-binding protein 62; Short=AtFKBP62; AltName: Full=Immunophilin FKBP62; AltName: Full=Peptidylprolyl isomerase ROF1; AltName: Full=Protein ROTAMASE FKBP 1; AltName: Full=Rotamase;
Cluster-28616.0	44.37	54.41	12.56	0	0	0	-12.8235	2.42934e-16	--	RHF2A_ARATH RecName: Full=E3 ubiquitin-protein ligase RHF2A {ECO:0000305}; EC=2.3.2.27; AltName: Full=RING-H2 finger F2a {ECO:0000303|PubMed:9781696}; AltName: Full=RING-H2 zinc finger protein RHF2a {ECO:0000305}; AltName: Full=RING-type E3 ubiquitin transferase RHF2A {ECO:0000305};
Cluster-22546.3	2.66	2.02	2.04	10.02	10.9	12.06	2.43795	2.55022e-16	--	--
Cluster-26813.9	8.13	10.8	7.71	0	0	0	-11.3023	2.62204e-16	--	EBS_ARATH RecName: Full=Chromatin remodeling protein EBS {ECO:0000305}; AltName: Full=Protein EARLY BOLTING IN SHORT DAYS {ECO:0000303|PubMed:11340178};
Cluster-12661.3	48.6	37.87	45.35	85.99	83.19	90.34	1.11639	2.62637e-16	ko03008: Ribosome biogenesis in eukaryotes	NOP5B_ARATH RecName: Full=Probable nucleolar protein 5-2; AltName: Full=MAR-binding NOP56/58 homolog 2; AltName: Full=Nucleolar protein 58-2;
Cluster-23182.9	0.83	0.29	1.07	18.24	40.47	23.98	5.43252	2.62637e-16	ko03010: Ribosome	--
Cluster-14866.5	6.45	11.38	9.98	0	0	0	-11.5186	2.65816e-16	ko03015: mRNA surveillance pathway	DEX1_ARATH RecName: Full=Protein DEFECTIVE IN EXINE FORMATION 1 {ECO:0000303|PubMed:11743117}; Flags: Precursor;
Cluster-20023.9	20.6	30.2	30.32	0	0	0	-11.2739	2.76719e-16	--	PUP11_ARATH RecName: Full=Probable purine permease 11; Short=AtPUP11;
Cluster-27372.0	6.71	9.33	6.83	0	0	0	-11.3075	2.83898e-16	--	--
Cluster-18259.9	5.54	7.06	4.24	0	0	0	-11.4329	2.97948e-16	--	JMJ25_ARATH RecName: Full=Lysine-specific demethylase JMJ25; EC=1.14.11.-; AltName: Full=Jumonji domain-containing protein 25; AltName: Full=Lysine-specific histone demethylase JMJ25; AltName: Full=Protein INCREASE IN BONSAI METHYLATION 1; AltName: Full=Protein JUMONJI 25;
Cluster-24575.0	929.69	1684.43	899.03	85.1	61.12	76.89	-3.83518	3.16697e-16	--	PLAT1_ARATH RecName: Full=PLAT domain-containing protein 1 {ECO:0000305}; Short=AtPLAT1 {ECO:0000303|PubMed:25396746}; Short=PLAT domain protein 1 {ECO:0000303|PubMed:25396746}; Flags: Precursor;
Cluster-24969.3	9.25	12.09	8.87	0	0	0	-11.2394	3.32649e-16	--	RUS6_ARATH RecName: Full=Protein root UVB sensitive 6 {ECO:0000303|PubMed:19515790};
Cluster-15914.2	2.12	2.14	2.05	13.45	20.14	15.63	3.10029	3.49726e-16	--	--
Cluster-16472.4	5.9	11.12	6.58	0	0	0	-11.7074	3.6932e-16	--	--
Cluster-31603.1	2.14	2.47	3.11	12.52	11	12.47	2.35341	3.85784e-16	ko00400: Phenylalanine, tyrosine and tryptophan biosynthesis; ko01100: Metabolic pathways; ko01110: Biosynthesis of secondary metabolites; ko01230: Biosynthesis of amino acids	AROF_ORYSJ RecName: Full=Phospho-2-dehydro-3-deoxyheptonate aldolase 1, chloroplastic; EC=2.5.1.54; AltName: Full=3-deoxy-D-arabino-heptulosonate 7-phosphate synthase 1; AltName: Full=DAHP synthase 1; AltName: Full=Phospho-2-keto-3-deoxyheptonate aldolase 1; Flags: Precursor;
Cluster-13122.3	31.88	114.26	25.18	0.06	0.3	0.22	-8.27427	3.85784e-16	--	--
Cluster-22318.2	3.03	5.03	3.37	0	0	0	-11.4847	4.01106e-16	--	--
Cluster-26200.1	6.75	4.95	5.66	25.78	38.85	28.08	2.56495	4.04061e-16	--	--
Cluster-24489.0	32.39	28.36	41.4	9.19	7.94	7.48	-1.91178	4.88259e-16	--	BAME1_ARATH RecName: Full=Leucine-rich repeat receptor-like serine/threonine-protein kinase BAM1; EC=2.7.11.1; AltName: Full=Protein BARELY ANY MERISTEM 1; Flags: Precursor;
Cluster-29642.1	26.01	37.31	7.67	0	0	0	-12.8817	4.91469e-16	ko03040: Spliceosome	SKIPA_ORYSJ RecName: Full=SNW/SKI-interacting protein A {ECO:0000305}; Short=OsSKIPa {ECO:0000303|PubMed:19339499};
Cluster-21015.5	17.42	8.93	16.06	0	0	0	-11.1098	5.01406e-16	--	MO25N_ARATH RecName: Full=Putative MO25-like protein At5g47540;
Cluster-19714.6	4.83	6.46	6.73	0	0	0	-11.1027	5.15613e-16	ko04016: MAPK signaling pathway - plant	FEI1_ARATH RecName: Full=LRR receptor-like serine/threonine-protein kinase FEI 1; EC=2.7.11.1; Flags: Precursor;
Cluster-17708.0	14.22	21.16	21.34	0	0	0	-11.2183	5.26667e-16	--	--
Cluster-28145.4	6.33	4.35	5.47	19.01	25.4	26.62	2.28478	5.79215e-16	--	AP1M2_ARATH RecName: Full=AP-1 complex subunit mu-2; AltName: Full=Adaptor protein complex AP-1 subunit mu-2; AltName: Full=Adaptor protein-1 mu-adaptin 2; AltName: Full=Adaptor-related protein complex 1 subunit mu-2; AltName: Full=At-muB2-Ad; AltName: Full=Clathrin assembly protein complex 1 mu-2 medium chain; AltName: Full=Mu1-adaptin 2; AltName: Full=Protein HAPLESS 13;
Cluster-29548.6	0	0	0	7.63	15.21	13.9	11.3935	5.79573e-16	--	Y1461_ARATH RecName: Full=Probable serine/threonine-protein kinase At1g54610; EC=2.7.11.1;
Cluster-27807.7	1.8	1.53	2.47	9.85	11.93	10.18	2.60583	5.80154e-16	ko00400: Phenylalanine, tyrosine and tryptophan biosynthesis; ko01100: Metabolic pathways; ko01110: Biosynthesis of secondary metabolites; ko01230: Biosynthesis of amino acids	SK1_ARATH RecName: Full=Shikimate kinase 1, chloroplastic; Short=AtSK1; EC=2.7.1.71; Flags: Precursor;
Cluster-21675.6	4.6	5.8	3.87	0	0	0	-11.2294	5.83259e-16	--	NIP11_ORYSJ RecName: Full=Aquaporin NIP1-1; AltName: Full=NOD26-like intrinsic protein 1-1; AltName: Full=OsNIP1;1;
Cluster-26371.4	0	0	0	9.85	7.08	10.8	10.9922	5.83259e-16	--	SOK5_ARATH RecName: Full=Protein SOSEKI 5 {ECO:0000303|PubMed:30737509}; Short=AtSOK5 {ECO:0000303|PubMed:32004461};
Cluster-22115.2	2.41	2.48	3	0	0	0	-10.8631	6.00566e-16	ko00030: Pentose phosphate pathway; ko00480: Glutathione metabolism; ko01100: Metabolic pathways; ko01110: Biosynthesis of secondary metabolites; ko01200: Carbon metabolism	G6PDC_SOLTU RecName: Full=Glucose-6-phosphate 1-dehydrogenase, chloroplastic; Short=G6PD; EC=1.1.1.49 {ECO:0000269|PubMed:9341136}; Flags: Precursor;
Cluster-27479.4	16.67	24.44	23.32	0	0	0	-11.1498	6.9514e-16	ko00350: Tyrosine metabolism; ko01100: Metabolic pathways	GSTZ_EUPES RecName: Full=Glutathione S-transferase zeta class; EC=2.5.1.18;
Cluster-13359.0	0.5	0.75	0.49	9.79	10.61	12.14	4.39627	6.9514e-16	ko00480: Glutathione metabolism; ko01100: Metabolic pathways	GSTX6_SOYBN RecName: Full=Probable glutathione S-transferase; EC=2.5.1.18; AltName: Full=G2-4; AltName: Full=Heat shock protein 26A;
Cluster-26089.1	0	0	0	9.32	7.22	15.2	11.388	7.1576e-16	--	HIP26_ARATH RecName: Full=Heavy metal-associated isoprenylated plant protein 26 {ECO:0000303|PubMed:21072340, ECO:0000303|PubMed:23368984}; Short=AtHIP26 {ECO:0000303|PubMed:23368984}; Short=AtHIPP26 {ECO:0000303|PubMed:21072340, ECO:0000303|PubMed:23368984}; AltName: Full=Farnesylated protein 6 {ECO:0000303|PubMed:8837031}; Short=AtFP6 {ECO:0000303|PubMed:8837031}; Flags: Precursor;
Cluster-17588.0	48.25	45.09	27.26	4.31	2.96	3.79	-3.32202	7.16378e-16	--	RPH1_ARATH RecName: Full=Protein RESISTANCE TO PHYTOPHTHORA 1, chloroplastic {ECO:0000303|PubMed:19170932}; Short=AtRPH1 {ECO:0000303|PubMed:19170932}; Flags: Precursor;
Cluster-28705.0	0	0	0	4.49	2.67	4.29	11.0964	7.41254e-16	ko03008: Ribosome biogenesis in eukaryotes	CD48C_ARATH RecName: Full=Cell division control protein 48 homolog C; Short=AtCDC48c; AltName: Full=Protein EMBRYO DEFECTIVE 1354;
Cluster-23770.2	9.91	4.98	8.97	0	0	0	-11.0751	7.48134e-16	--	ATL3_ARATH RecName: Full=RING-H2 finger protein ATL3; EC=2.3.2.27 {ECO:0000305}; AltName: Full=RING-type E3 ubiquitin transferase ATL3 {ECO:0000305};
Cluster-22579.7	3.71	3.17	3.13	0	0	0	-10.7888	7.48618e-16	ko03060: Protein export	ALB32_ARATH RecName: Full=ALBINO3-like protein 2, chloroplastic; Short=Ath5; Flags: Precursor;
Cluster-22651.1	3.31	3.21	3.85	0	0	0	-10.7826	7.74265e-16	--	CBP22_HORVU RecName: Full=Serine carboxypeptidase II-2; EC=3.4.16.6; AltName: Full=CP-MII.2; Contains: RecName: Full=Serine carboxypeptidase II-2 chain A; Contains: RecName: Full=Serine carboxypeptidase II-2 chain B; Flags: Precursor; Fragment;
Cluster-20973.3	0	0	0	5.64	6.75	5.52	10.7964	7.88528e-16	--	LCMT1_ARATH RecName: Full=Leucine carboxyl methyltransferase 1 homolog {ECO:0000305}; EC=2.1.1.233 {ECO:0000269|PubMed:21558554}; AltName: Full=Protein SUPPRESSOR OF BRI1 {ECO:0000303|PubMed:21558554}; AltName: Full=[Phosphatase 2A protein]-leucine-carboxy methyltransferase 1 {ECO:0000305};
Cluster-28696.1	6.88	3.46	5.32	0	0	0	-11.0352	8.0159e-16	ko03008: Ribosome biogenesis in eukaryotes	CD48C_ARATH RecName: Full=Cell division control protein 48 homolog C; Short=AtCDC48c; AltName: Full=Protein EMBRYO DEFECTIVE 1354;
Cluster-26381.3	0	0	0	3.74	8.77	4.46	11.6223	8.02209e-16	--	OP24A_ARATH RecName: Full=Outer envelope pore protein 24A, chloroplastic; AltName: Full=Chloroplastic outer envelope pore protein of 24 kDa A;
Cluster-23829.5	0	0	0	4.08	2.19	4.04	11.2388	8.02209e-16	--	PHSB_ARATH RecName: Full=Probable polyamine transporter At1g31830;
Cluster-28297.1	25.21	9.97	34.59	410.54	239.66	249.71	3.74868	8.42271e-16	ko00130: Ubiquinone and other terpenoid-quinone biosynthesis; ko00940: Phenylpropanoid biosynthesis; ko01100: Metabolic pathways; ko01110: Biosynthesis of secondary metabolites	CCL1_HUMLU RecName: Full=4-coumarate--CoA ligase CCL1 {ECO:0000303|PubMed:23300257}; Short=HlCCL1 {ECO:0000303|PubMed:23300257}; EC=6.2.1.12 {ECO:0000269|PubMed:23300257};
Cluster-29531.4	47.44	65.92	78.37	7.75	7.02	4.91	-3.16629	8.49227e-16	--	NAC2_ARATH RecName: Full=NAC domain-containing protein 2; Short=ANAC002;
Cluster-42780.1	7.79	3.56	5.37	0	0	0	-11.1464	8.51953e-16	ko00562: Inositol phosphate metabolism; ko00564: Glycerophospholipid metabolism; ko00565: Ether lipid metabolism; ko01100: Metabolic pathways; ko01110: Biosynthesis of secondary metabolites	NPC2_ARATH RecName: Full=Non-specific phospholipase C2; EC=3.1.-.-; Flags: Precursor;
Cluster-27077.5	1.94	4.73	3.81	0	0	0	-11.796	9.17667e-16	ko00330: Arginine and proline metabolism; ko00410: beta-Alanine metabolism; ko00770: Pantothenate and CoA biosynthesis; ko01100: Metabolic pathways	LDL3_ARATH RecName: Full=Lysine-specific histone demethylase 1 homolog 3; EC=1.-.-.-; AltName: Full=Flavin-containing amine oxidase domain-containing protein 3; AltName: Full=Protein LSD1-like 3;
Cluster-26579.1	10.86	10.13	9.49	30.24	32.13	34.96	1.81275	9.47088e-16	ko03013: Nucleocytoplasmic transport	RAGP2_ARATH RecName: Full=RAN GTPase-activating protein 2; Short=AtRanGAP2; Short=RanGAP2;
Cluster-19918.7	5.1	4.11	2.82	0	0	0	-11.1718	1.00615e-15	--	POLR2_ARATH RecName: Full=Retrovirus-related Pol polyprotein from transposon RE2; AltName: Full=Retro element 2 {ECO:0000303|PubMed:10689195}; Short=AtRE2 {ECO:0000303|PubMed:10689195}; Includes: RecName: Full=Protease RE2; EC=3.4.23.-; Includes: RecName: Full=Reverse transcriptase RE2; EC=2.7.7.49; Includes: RecName: Full=Endonuclease RE2;
Cluster-19416.10	38.45	34.11	28.84	195.06	141.19	224.14	2.59196	1.07091e-15	--	PBL19_ARATH RecName: Full=Probable serine/threonine-protein kinase PBL19 {ECO:0000305}; EC=2.7.11.1 {ECO:0000305}; AltName: Full=PBS1-like protein 19 {ECO:0000303|PubMed:20413097};
Cluster-27565.5	755.96	1436.23	815	9.27	33.19	23.93	-5.38805	1.09862e-15	ko04141: Protein processing in endoplasmic reticulum; ko04626: Plant-pathogen interaction	HSP83_IPONI RecName: Full=Heat shock protein 83;
Cluster-20520.0	15.39	14.13	15.25	1.74	1.1	0.63	-3.7749	1.15374e-15	--	FB4_ARATH RecName: Full=F-box protein At1g11270;
Cluster-23684.7	0.09	0.16	0.33	16.64	38.77	33.15	6.61122	1.17119e-15	ko04712: Circadian rhythm - plant	DOF56_ARATH RecName: Full=Dof zinc finger protein DOF5.6 {ECO:0000303|PubMed:12475498}; Short=AtDOF5.6 {ECO:0000303|PubMed:12475498}; AltName: Full=Protein HIGH CAMBIAL ACTIVITY 2 {ECO:0000303|PubMed:19915089}; AltName: Full=Protein PHLOEM EARLY DOF HCA2 {ECO:0000303|PubMed:30626969};
Cluster-28431.4	10.61	8.9	15.22	105.14	257.95	144.12	4.02196	1.18391e-15	--	--
Cluster-4352.1	10.7	17.16	10.49	108.74	132.61	120.41	3.33653	1.27144e-15	ko03010: Ribosome	RK27_SPIOL RecName: Full=50S ribosomal protein L27, chloroplastic {ECO:0000303|PubMed:10874046}; AltName: Full=CL27; AltName: Full=Chloroplastic large ribosomal subunit protein bL27c {ECO:0000303|PubMed:28007896}; Flags: Precursor;
Cluster-30895.0	37.37	40.49	27.72	0	0	0	-11.0519	1.27459e-15	--	--
Cluster-27547.0	6.36	5.48	5.94	1.79	1.43	1.52	-1.76837	1.31463e-15	--	FB304_ARATH RecName: Full=F-box protein At3g54460;
Cluster-19918.1	2.93	2.48	3.3	0	0	0	-10.691	1.31463e-15	--	POLR2_ARATH RecName: Full=Retrovirus-related Pol polyprotein from transposon RE2; AltName: Full=Retro element 2 {ECO:0000303|PubMed:10689195}; Short=AtRE2 {ECO:0000303|PubMed:10689195}; Includes: RecName: Full=Protease RE2; EC=3.4.23.-; Includes: RecName: Full=Reverse transcriptase RE2; EC=2.7.7.49; Includes: RecName: Full=Endonuclease RE2;
Cluster-28602.0	14.19	11.95	17.19	3.16	3.22	3.79	-1.93317	1.32718e-15	--	--
Cluster-26962.1	118.6	186.4	133.62	0	0	0.29	-10.9728	1.34053e-15	--	--
Cluster-17936.0	28.62	16.67	21.77	2.15	3.18	1.95	-3.05457	1.34512e-15	--	LSH4_ARATH RecName: Full=Protein LIGHT-DEPENDENT SHORT HYPOCOTYLS 4; AltName: Full=Protein ORGAN BOUNDARY 4;
Cluster-25309.0	26.13	6.59	14.11	0	0	0	-11.89	1.35936e-15	--	--
Cluster-20849.4	94.42	74.89	164.92	3.65	6.36	8.17	-4.04345	1.37951e-15	--	HS174_ARATH RecName: Full=17.4 kDa class III heat shock protein; AltName: Full=17.4 kDa heat shock protein 2; Short=AtHsp17.4B;
Cluster-9320.1	294.07	411.44	378.36	592.72	822.39	741.38	1.62636	1.39587e-15	ko00520: Amino sugar and nucleotide sugar metabolism; ko01100: Metabolic pathways; ko04016: MAPK signaling pathway - plant	WIN2_SOLTU RecName: Full=Wound-induced protein WIN2; Flags: Precursor;
Cluster-28075.2	0	0	0	9.87	6.63	12.45	11.1004	1.4044e-15	ko00240: Pyrimidine metabolism; ko00410: beta-Alanine metabolism; ko00770: Pantothenate and CoA biosynthesis; ko01100: Metabolic pathways	BUP1_ARATH RecName: Full=Beta-ureidopropionase {ECO:0000303|PubMed:11161056}; EC=3.5.1.6 {ECO:0000269|PubMed:11161056, ECO:0000269|PubMed:19413687}; AltName: Full=N-carbamoyl-beta-alanine amidohydrolase {ECO:0000303|Ref.1}; AltName: Full=Protein PYRIMIDINE 3 {ECO:0000303|Ref.1};
Cluster-23829.4	19.13	26.99	12.52	0.08	0	0	-9.46788	1.56481e-15	--	CDKF4_ORYSJ RecName: Full=Cyclin-dependent kinase F-4; Short=CDKF;4; EC=2.7.11.22; EC=2.7.11.23; AltName: Full=Serine/threonine-protein kinase MHK-like protein 2;
Cluster-6241.10	28.39	35.14	35.52	127.05	129.14	122.5	2.05503	1.61281e-15	ko04626: Plant-pathogen interaction	CDPK5_ARATH RecName: Full=Calcium-dependent protein kinase 5; EC=2.7.11.1; AltName: Full=Calmodulin-domain protein kinase CDPK isoform 5;
Cluster-24505.13	32.77	66.2	76.81	1.15	0.99	2.66	-4.85253	1.72475e-15	--	HFA6B_ARATH RecName: Full=Heat stress transcription factor A-6b; Short=AtHsfA6b; AltName: Full=AtHsf-07;
Cluster-20173.3	62.22	58.48	63.49	18.27	13.47	13.74	-1.88955	1.72475e-15	--	--
Cluster-24722.4	14.71	17.7	6.28	0	0	0	-11.8817	1.7341e-15	ko00510: N-Glycan biosynthesis; ko00513: Various types of N-glycan biosynthesis; ko01100: Metabolic pathways; ko04141: Protein processing in endoplasmic reticulum	MNS1_ARATH RecName: Full=Mannosyl-oligosaccharide 1,2-alpha-mannosidase MNS1; Short=AtMANIb; EC=3.2.1.113 {ECO:0000269|PubMed:19914916}; EC=3.2.1.209 {ECO:0000269|PubMed:19914916}; AltName: Full=Alpha-mannosidase IB;
Cluster-28306.11	0.81	1.02	1.53	30.67	11.64	19.46	4.32947	1.81731e-15	ko00130: Ubiquinone and other terpenoid-quinone biosynthesis; ko00940: Phenylpropanoid biosynthesis; ko00941: Flavonoid biosynthesis; ko00945: Stilbenoid, diarylheptanoid and gingerol biosynthesis; ko01100: Metabolic pathways; ko01110: Biosynthesis of secondary metabolites	TCMO_CATRO RecName: Full=Trans-cinnamate 4-monooxygenase; EC=1.14.14.91 {ECO:0000250|UniProtKB:Q04468}; AltName: Full=Cinnamic acid 4-hydroxylase; Short=C4H; Short=CA4H; AltName: Full=Cytochrome P450 73; AltName: Full=Cytochrome P450C4H;
Cluster-27027.5	6.51	9.49	8.35	0	0	0	-11.0533	1.82105e-15	--	SBT_PETHY RecName: Full=Subtilisin-like protease {ECO:0000303|PubMed:25971550}; Short=Subtilase {ECO:0000303|PubMed:25971550}; EC=3.4.21.- {ECO:0000255|PROSITE-ProRule:PRU10080}; Flags: Precursor;
Cluster-43309.0	3719.75	3433.87	6247.44	35.56	134.07	41.55	-5.78244	1.85009e-15	ko04141: Protein processing in endoplasmic reticulum	HSP21_SOLPE RecName: Full=17.3 kDa class II heat shock protein; AltName: Full=Hsp17.3; AltName: Full=Hsp20.2;
Cluster-5871.2	0.27	0.09	0	12.27	21.18	15.68	7.37082	1.85918e-15	--	PESC_ORYSJ RecName: Full=Pescadillo homolog {ECO:0000255|HAMAP-Rule:MF_03028};
Cluster-29576.1	777.51	1019.55	1041.8	61.34	110.76	102.95	-3.23915	1.92677e-15	--	FKB65_ARATH RecName: Full=Peptidyl-prolyl cis-trans isomerase FKBP65; Short=PPIase FKBP65; EC=5.2.1.8; AltName: Full=70 kDa peptidyl-prolyl isomerase; AltName: Full=FK506-binding protein 65; Short=AtFKBP65; AltName: Full=Immunophilin FKBP65; AltName: Full=Peptidyl-prolyl isomerase ROF2; AltName: Full=Protein ROTAMASE FKBP 2; AltName: Full=Rotamase;
Cluster-27987.0	29.85	24.46	26.22	61.06	65.52	67.75	1.3826	1.95784e-15	--	Y5713_ARATH RecName: Full=PI-PLC X domain-containing protein At5g67130; Flags: Precursor;
Cluster-24903.0	1.3	0.72	2.18	18.02	25.82	23.91	4.18986	1.97349e-15	--	--
Cluster-22613.0	0.58	1.06	0.52	21.52	12.76	15.44	4.61157	2.00703e-15	--	UTR4_ARATH RecName: Full=UDP-galactose/UDP-glucose transporter 4 {ECO:0000303|PubMed:12042319}; Short=AtUTr4 {ECO:0000303|PubMed:12042319};
Cluster-25043.5	11.99	6.14	18.89	0	0	0	-11.4916	2.06669e-15	ko00520: Amino sugar and nucleotide sugar metabolism; ko01100: Metabolic pathways	NFH1_MEDTR RecName: Full=Nod factor hydrolase protein 1 {ECO:0000303|PubMed:24082029}; Short=MtNFH1 {ECO:0000303|PubMed:24082029}; AltName: Full=Class V chitinase NFH1 {ECO:0000305}; AltName: Full=Mtchit5 {ECO:0000303|PubMed:15107993}; Flags: Precursor;
Cluster-26853.0	19.49	22.23	12.71	0	0	0	-11.198	2.13332e-15	--	--
Cluster-23641.3	156.66	18.26	349.34	0	0.04	0	-13.6374	2.19759e-15	--	XTH23_ARATH RecName: Full=Probable xyloglucan endotransglucosylase/hydrolase protein 23; Short=At-XTH23; Short=XTH-23; EC=2.4.1.207; Flags: Precursor;
Cluster-20987.5	0	0	0	25.11	7.29	26.94	12.0594	2.1993e-15	ko00240: Pyrimidine metabolism; ko00250: Alanine, aspartate and glutamate metabolism; ko01100: Metabolic pathways; ko01240: Biosynthesis of cofactors	CARA_ARATH RecName: Full=Carbamoyl-phosphate synthase small chain, chloroplastic; EC=6.3.5.5; AltName: Full=Carbamoyl-phosphate synthetase glutamine chain; AltName: Full=Protein VENOSA 6; Flags: Precursor;
Cluster-29622.0	33.54	22.92	38.7	105.62	126.64	119.53	1.98265	2.1993e-15	ko04141: Protein processing in endoplasmic reticulum	SAR1A_BRACM RecName: Full=GTP-binding protein SAR1A;
Cluster-16984.5	13.82	7.29	8.29	0	0	0	-10.9783	2.21069e-15	--	LIIP1_ARATH RecName: Full=Small GTPase LIP1 {ECO:0000303|PubMed:17683937}; AltName: Full=Protein LIGHT INSENSITIVE PERIOD 1 {ECO:0000303|PubMed:17683937};
Cluster-28379.0	91.49	57.06	77.24	485.92	585.3	1045.6	3.40699	2.30691e-15	ko00940: Phenylpropanoid biosynthesis; ko01100: Metabolic pathways; ko01110: Biosynthesis of secondary metabolites	CCR1_PETHY RecName: Full=Cinnamoyl-CoA reductase 1 {ECO:0000303|PubMed:24985707, ECO:0000303|PubMed:25217505}; Short=PhCCR1 {ECO:0000303|PubMed:24985707, ECO:0000303|PubMed:25217505}; EC=1.2.1.44 {ECO:0000250|UniProtKB:Q9S9N9}; AltName: Full=Coniferylaldehyde synthase {ECO:0000305}; EC=1.2.1.- {ECO:0000269|PubMed:24985707, ECO:0000269|PubMed:25217505};
Cluster-23102.3	2.28	3.68	3.3	0	0	0	-11.1182	2.33341e-15	ko00380: Tryptophan metabolism; ko01100: Metabolic pathways	C7317_PRUMU RecName: Full=Cytochrome P450 736A117 {ECO:0000303|PubMed:25015725}; EC=1.14.-.- {ECO:0000305};
Cluster-25222.5	8.67	9.26	9.19	0	0	0	-10.6909	2.40357e-15	--	--
Cluster-26976.7	0	0	0	2.62	2.01	2.53	10.6683	2.43175e-15	--	MSL8_ARATH RecName: Full=Mechanosensitive ion channel protein 8 {ECO:0000303|Ref.4}; AltName: Full=Mechanosensitive channel of small conductance-like 8 {ECO:0000303|Ref.4}; AltName: Full=MscS-Like protein 8 {ECO:0000303|Ref.4};
Cluster-16785.2	13.51	13.22	10.54	0	0	0	-10.8011	2.43587e-15	--	RMR41_ARATH RecName: Full=Remorin 4.1 {ECO:0000305}; Short=AtREM4.1 {ECO:0000303|PubMed:17984200}; AltName: Full=Remorin group 4 member 1 {ECO:0000305};
Cluster-11022.1	0.18	0.04	0.06	4.09	13.05	14.14	7.05039	2.44489e-15	ko00270: Cysteine and methionine metabolism; ko01100: Metabolic pathways	MTK_ARATH RecName: Full=Methylthioribose kinase; Short=AtMTK; Short=MTR kinase; EC=2.7.1.100;
Cluster-25184.0	5.15	2.54	2.49	0.04	0	0.03	-7.15811	2.53359e-15	--	TBL25_ARATH RecName: Full=Protein trichome birefringence-like 25;
Cluster-27657.0	29.77	66.87	21.24	0.16	0	0.2	-8.35754	2.60426e-15	--	RAP24_ARATH RecName: Full=Ethylene-responsive transcription factor RAP2-4; AltName: Full=Ethylene-responsive transcription factor ERF059; AltName: Full=Protein RELATED TO APETALA2 4;
Cluster-34394.16	28.5	3.22	7.5	875.9	2882.43	1753.97	7.33877	2.62472e-15	ko03040: Spliceosome; ko04141: Protein processing in endoplasmic reticulum; ko04144: Endocytosis	HS704_ARATH RecName: Full=Heat shock 70 kDa protein 4 {ECO:0000303|PubMed:11599561}; AltName: Full=Heat shock cognate 70 kDa protein 4 {ECO:0000303|PubMed:11402207}; AltName: Full=Heat shock cognate protein 70-4 {ECO:0000303|PubMed:11402207}; Short=AtHsc70-4 {ECO:0000303|PubMed:11402207}; AltName: Full=Heat shock protein 70-4 {ECO:0000303|PubMed:11599561}; Short=AtHsp70-4 {ECO:0000303|PubMed:1159…
Cluster-5871.5	0.11	0	0.07	19.98	4.99	20.38	8.28656	2.62645e-15	--	PESC_ORYSJ RecName: Full=Pescadillo homolog {ECO:0000255|HAMAP-Rule:MF_03028};
Cluster-20555.1	0	0	0	17.7	23.68	22.1	10.722	2.71638e-15	--	--
Cluster-13122.4	18.06	54.82	9.8	0	0	0	-13.1372	2.74836e-15	--	--
Cluster-22896.5	0	0	0	5.82	7.67	7.88	10.7229	2.8972e-15	--	VPS41_ARATH RecName: Full=Vacuolar protein sorting-associated protein 41 homolog;
Cluster-11713.1	13.91	15.3	13.09	0	0	0	-10.7465	2.90998e-15	--	THF1_SOLTU RecName: Full=Protein THYLAKOID FORMATION1, chloroplastic; Flags: Precursor;
Cluster-26699.4	21.89	19.03	20.53	49.8	59.92	55.1	1.55716	2.95679e-15	ko00900: Terpenoid backbone biosynthesis; ko01110: Biosynthesis of secondary metabolites	--
Cluster-25627.2	47.49	8.29	21.66	0	0	0	-12.3295	2.99368e-15	ko00010: Glycolysis / Gluconeogenesis; ko01100: Metabolic pathways; ko01110: Biosynthesis of secondary metabolites; ko01200: Carbon metabolism; ko01230: Biosynthesis of amino acids; ko03018: RNA degradation	ENO_ORYSJ RecName: Full=Enolase; EC=4.2.1.11; AltName: Full=2-phospho-D-glycerate hydro-lyase; AltName: Full=2-phosphoglycerate dehydratase; AltName: Full=OSE1;
Cluster-27792.10	0	0	0	4.15	2.39	3.62	10.9056	3.04908e-15	--	Y7797_ORYSJ RecName: Full=B3 domain-containing protein Os07g0679700;
Cluster-23831.5	2.51	2.72	2.41	0	0	0	-10.7121	3.20471e-15	ko03018: RNA degradation	--
Cluster-29434.0	0.31	0.44	0.11	26.28	59.69	24.43	7.27625	3.36017e-15	--	--
Cluster-16591.2	6.17	3.01	5.55	44.23	73.56	47.91	3.62881	3.39907e-15	--	--
Cluster-25526.3	23.9	13.2	4.16	0	0	0	-12.5347	3.39907e-15	--	CRSP_ARATH RecName: Full=CO(2)-response secreted protease {ECO:0000303|PubMed:25043023}; AltName: Full=Subtilisin-like serine protease {ECO:0000303|PubMed:25043023}; Short=AtSBT5.2 {ECO:0000303|PubMed:25043023}; AltName: Full=Tripeptidyl-peptidase II {ECO:0000255|PROSITE-ProRule:PRU10081}; EC=3.4.14.10 {ECO:0000255|PROSITE-ProRule:PRU10081}; Flags: Precursor;
Cluster-26586.0	0.25	0.34	0.23	6.23	5.3	8.54	4.67772	3.51317e-15	--	LBD22_ARATH RecName: Full=LOB domain-containing protein 22; AltName: Full=ASYMMETRIC LEAVES 2-like protein 30; Short=AS2-like protein 30;
Cluster-26265.0	70.04	57.42	89.07	225.37	211.9	202.92	1.70666	3.58209e-15	ko04145: Phagosome	TBB2_ORYSJ RecName: Full=Tubulin beta-2 chain; AltName: Full=Beta-2-tubulin;
Cluster-11660.3	5.6	3.84	4.5	0	0	0	-10.604	3.63886e-15	--	--
Cluster-28499.1	3.17	3.58	2.39	0	0	0	-10.9438	3.73269e-15	--	BIG5_ARATH RecName: Full=Brefeldin A-inhibited guanine nucleotide-exchange protein 5; Short=BIG5; AltName: Full=ARF guanine-nucleotide exchange factor BIG5; AltName: Full=Protein BFA-VISUALIZED ENDOCYTIC TRAFFICKING DEFECTIVE 1; Short=Protein BEN1; AltName: Full=Protein HOPM INTERACTOR 7;
Cluster-26902.1	0	0	0	22.36	4.96	23.68	12.3644	4.18214e-15	--	PP326_ARATH RecName: Full=Pentatricopeptide repeat-containing protein At4g19890;
Cluster-23391.2	17.05	13.48	12.6	56.58	67.89	59.63	2.24316	4.36887e-15	--	GASA6_ARATH RecName: Full=Gibberellin-regulated protein 6; AltName: Full=GAST1 protein homolog 6; Flags: Precursor;
Cluster-28888.1	9.09	12.33	3.58	0	0	0	-12.0275	4.40705e-15	--	TRM32_ARATH RecName: Full=Protein TRM32; AltName: Full=TON1-RECRUITING MOTIF protein 32;
Cluster-20162.2	9.84	9.57	11.11	0	0	0	-10.5523	4.52189e-15	--	--
Cluster-19763.4	53.86	7.92	35.68	0	0	0	-12.4722	4.56472e-15	--	FB331_ARATH RecName: Full=Probable F-box protein At3g61730; AltName: Full=Protein RFM; AltName: Full=Reduced male fertility protein;
Cluster-2817.0	10.82	4.98	7.36	2.83	13.7	0	-7.25805	4.62864e-15	--	--
Cluster-26741.0	0	0	0	9.15	8.96	14.74	10.9032	4.67429e-15	--	HDT1_ARATH RecName: Full=Histone deacetylase HDT1; AltName: Full=HD-tuins protein 1; AltName: Full=Histone deacetylase 2a;
Cluster-42629.1	967.61	1584.41	857.47	79.58	102.26	94.27	-3.53431	4.88755e-15	--	MCA4_ARATH RecName: Full=Metacaspase-4; Short=AtMC4; EC=3.4.22.-; AltName: Full=Metacaspase 2d; Short=AtMCP2d; AltName: Full=Metacaspase-7; Contains: RecName: Full=Metacaspase-4 subunit p20; Contains: RecName: Full=Metacaspase-4 subunit p10;
Cluster-13826.0	22.81	19.57	25.34	0	0	0	-10.504	5.371e-15	--	--
Cluster-17385.10	5	12.71	8.59	0	0	0	-11.6065	5.85013e-15	--	ACT7_ARATH RecName: Full=Actin-7 {ECO:0000303|PubMed:8754679}; AltName: Full=Actin-2 {ECO:0000303|Ref.1};
Cluster-11872.1	5.34	7.21	7.8	0	0	0	-10.802	6.00441e-15	--	PP227_ARATH RecName: Full=Putative pentatricopeptide repeat-containing protein At3g13770, mitochondrial; Flags: Precursor;
Cluster-23570.1	10	7.11	8.61	0	0	0	-10.507	6.15719e-15	--	--
Cluster-22800.2	6.79	7.33	9.96	0	0.11	0.11	-6.99746	6.3936e-15	--	FIS1A_ARATH RecName: Full=Mitochondrial fission 1 protein A; AltName: Full=FIS1 homolog A; Short=AtFIS1a; AltName: Full=Protein BIGYIN 1;
Cluster-8102.2	11.52	19.1	28.95	0	0	0	-11.3172	6.90993e-15	--	CHR12_ARATH RecName: Full=Probable ATP-dependent DNA helicase CHR12; EC=3.6.4.12; AltName: Full=Protein CHROMATIN REMODELING 12 {ECO:0000303|PubMed:16547115}; Short=AtCHR12 {ECO:0000303|PubMed:17605754}; AltName: Full=Protein MINUSCULE 1 {ECO:0000303|PubMed:23062007};
Cluster-29134.5	4.23	10.63	3.98	0	0	0	-11.9681	7.18282e-15	--	PUB24_ORYSJ RecName: Full=U-box domain-containing protein 24 {ECO:0000305}; EC=2.3.2.27 {ECO:0000269|PubMed:30920691}; AltName: Full=Plant U-box protein 24 {ECO:0000303|PubMed:30920691}; Short=OsPUB24 {ECO:0000303|PubMed:30920691}; AltName: Full=RING-type E3 ubiquitin transferase PUB24 {ECO:0000305};
Cluster-26262.1	15.21	34.81	13.21	0.1	0	0	-10.7751	7.25111e-15	ko00190: Oxidative phosphorylation; ko01100: Metabolic pathways; ko04145: Phagosome	VATH_ARATH RecName: Full=V-type proton ATPase subunit H; Short=V-ATPase subunit H; AltName: Full=Vacuolar H(+)-ATPase subunit H; AltName: Full=Vacuolar proton pump subunit H;
Cluster-21662.6	0	0	0	1.17	2.22	1.93	10.9524	7.69954e-15	--	NRAM5_ORYSJ RecName: Full=Metal transporter Nramp5;
Cluster-28107.5	3.62	16.3	13.09	0	0	0	-12.3698	7.70473e-15	ko00500: Starch and sucrose metabolism; ko01100: Metabolic pathways	E13B_WHEAT RecName: Full=Glucan endo-1,3-beta-glucosidase; EC=3.2.1.39; AltName: Full=(1->3)-beta-glucan endohydrolase; Short=(1->3)-beta-glucanase; AltName: Full=Beta-1,3-endoglucanase; Flags: Precursor;
Cluster-30204.18	0	0	0	3.73	2.32	2.9	10.6842	7.87498e-15	--	PP110_ARATH RecName: Full=Pentatricopeptide repeat-containing protein At1g69290;
Cluster-25380.0	6.72	9.13	5.79	0	0	0	-10.9663	7.93823e-15	--	ZTP50_ARATH RecName: Full=Putative zinc transporter At3g08650;
Cluster-5570.0	43.1	41.43	50.71	7.34	4.88	8.48	-2.57704	8.28297e-15	--	CIPK4_ARATH RecName: Full=CBL-interacting serine/threonine-protein kinase 4; EC=2.7.11.1; AltName: Full=SNF1-related kinase 3.3; AltName: Full=SOS2-like protein kinase PKS9;
Cluster-28829.3	3.16	4.99	3.39	0	0	0	-11.0175	8.44239e-15	ko00400: Phenylalanine, tyrosine and tryptophan biosynthesis; ko01100: Metabolic pathways; ko01110: Biosynthesis of secondary metabolites; ko01230: Biosynthesis of amino acids	TYRA1_ARATH RecName: Full=Arogenate dehydrogenase 1, chloroplastic; EC=1.3.1.78; AltName: Full=TYRATC; AltName: Full=TyrAAT1; Flags: Precursor;
Cluster-26823.0	218.06	277.57	277.21	51.73	55.28	56.58	-2.12554	8.45642e-15	ko03018: RNA degradation	CPNB1_ARATH RecName: Full=Chaperonin 60 subunit beta 1, chloroplastic; Short=CPN-60 beta 1; AltName: Full=60 kDa chaperonin subunit beta 1; AltName: Full=RuBisCO large subunit-binding protein subunit beta, chloroplastic; Flags: Precursor;
Cluster-21592.5	9.02	25.13	9.98	0	0	0	-11.9807	8.77606e-15	--	SIZ1_ARATH RecName: Full=E3 SUMO-protein ligase SIZ1 {ECO:0000303|PubMed:15894620}; EC=2.3.2.- {ECO:0000305}; AltName: Full=E3 SUMO-protein transferase SIZ1 {ECO:0000305};
Cluster-22084.3	6.42	4.7	5	0	0	0	-10.4886	9.74448e-15	--	NNRD_VITVI RecName: Full=ATP-dependent (S)-NAD(P)H-hydrate dehydratase {ECO:0000255|HAMAP-Rule:MF_03157}; EC=4.2.1.93 {ECO:0000255|HAMAP-Rule:MF_03157}; AltName: Full=ATP-dependent NAD(P)HX dehydratase {ECO:0000255|HAMAP-Rule:MF_03157};
Cluster-28537.44	12.71	23.11	18.07	0.13	0	0.21	-7.47909	9.91247e-15	--	--
Cluster-18407.0	25.92	31.08	9.93	0	0	0	-11.755	9.92659e-15	--	NRX1_ARATH RecName: Full=Probable nucleoredoxin 1; Short=AtNrx1; EC=1.8.1.8;
Cluster-14268.0	5	7.53	7.13	0	0	0	-10.8359	1.00957e-14	ko00970: Aminoacyl-tRNA biosynthesis; ko01100: Metabolic pathways	GATA_VITVI RecName: Full=Glutamyl-tRNA(Gln) amidotransferase subunit A, chloroplastic/mitochondrial {ECO:0000255|HAMAP-Rule:MF_03150}; Short=Glu-AdT subunit A {ECO:0000255|HAMAP-Rule:MF_03150}; EC=6.3.5.7 {ECO:0000255|HAMAP-Rule:MF_03150};
Cluster-30031.1	3.54	6.1	3.11	0.06	0.11	0.05	-6.07239	1.02281e-14	--	--
Cluster-19807.8	0	0	0	2.8	9.15	5.12	11.6208	1.0271e-14	ko00510: N-Glycan biosynthesis; ko01100: Metabolic pathways	S6PD_MALDO RecName: Full=NADP-dependent D-sorbitol-6-phosphate dehydrogenase; EC=1.1.1.200; AltName: Full=Aldose-6-phosphate reductase [NADPH]; AltName: Full=NADP-S6PDH;
Cluster-24454.0	53.76	83.45	106.91	6.67	7.1	7.1	-3.84438	1.09326e-14	--	XTH32_ARATH RecName: Full=Probable xyloglucan endotransglucosylase/hydrolase protein 32; Short=At-XTH32; Short=XTH-32; EC=2.4.1.207; Flags: Precursor;
Cluster-18991.0	20.1	12.19	18.46	3.16	3.7	3.54	-2.22728	1.133e-14	--	HAK11_ORYSJ RecName: Full=Probable potassium transporter 11 {ECO:0000303|PubMed:12376644}; AltName: Full=OsHAK11 {ECO:0000303|PubMed:12376644};
Cluster-22914.7	8.23	8.61	3.77	0	0	0	-11.3375	1.133e-14	--	MSL2_ARATH RecName: Full=Mechanosensitive ion channel protein 2, chloroplastic; AltName: Full=Mechanosensitive channel of small conductance-like 2; AltName: Full=MscS-Like protein 2; Flags: Precursor;
Cluster-9677.3	4.68	5.63	9.37	0	0	0	-10.9469	1.14953e-14	ko00040: Pentose and glucuronate interconversions; ko00051: Fructose and mannose metabolism; ko01100: Metabolic pathways	DHSO_ARATH RecName: Full=Sorbitol dehydrogenase {ECO:0000303|Ref.7}; Short=SDH {ECO:0000303|Ref.7}; EC=1.1.1.- {ECO:0000269|Ref.7}; AltName: Full=Polyol dehydrogenase {ECO:0000305|Ref.7}; AltName: Full=Ribitol dehydrogenase {ECO:0000303|Ref.7}; Short=RDH {ECO:0000303|Ref.7}; EC=1.1.1.56 {ECO:0000269|Ref.7}; AltName: Full=Xylitol dehydrogenase {ECO:0000303|Ref.7}; Short=XDH {ECO:0000303|Ref.7}; EC…
Cluster-24826.7	33.74	10.36	17.45	0	0	0	-11.3625	1.15023e-14	ko03010: Ribosome	RS3A1_VITVI RecName: Full=40S ribosomal protein S3a-1 {ECO:0000255|HAMAP-Rule:MF_03122};
Cluster-28651.0	0.95	1.96	2.79	29.82	54.71	53.53	4.72573	1.18445e-14	--	BH151_ARATH RecName: Full=Transcription factor UPBEAT1; AltName: Full=Basic helix-loop-helix protein 151; Short=AtbHLH151; Short=bHLH 151; AltName: Full=Transcription factor EN 146; AltName: Full=Transcription factor bHLH151; AltName: Full=bHLH transcription factor bHLH151;
Cluster-27807.10	10.99	8.4	15.55	49.49	55.48	59.22	2.38499	1.19401e-14	ko00400: Phenylalanine, tyrosine and tryptophan biosynthesis; ko01100: Metabolic pathways; ko01110: Biosynthesis of secondary metabolites; ko01230: Biosynthesis of amino acids	SK_SOLLC RecName: Full=Shikimate kinase, chloroplastic; EC=2.7.1.71; Flags: Precursor;
Cluster-28086.1	17.37	30.38	47.54	0	0	0	-11.3439	1.20309e-14	--	--
Cluster-27198.3	15.17	8.36	9.32	0	0	0	-10.7137	1.22343e-14	ko00906: Carotenoid biosynthesis; ko01110: Biosynthesis of secondary metabolites	D27_MEDTR RecName: Full=Beta-carotene isomerase D27, chloroplastic {ECO:0000305}; EC=5.2.1.14 {ECO:0000269|PubMed:26503135}; AltName: Full=Protein DWARF-27 {ECO:0000305}; Flags: Precursor;
Cluster-21908.8	17.78	6.31	8.83	0	0	0	-11.2134	1.23105e-14	ko03018: RNA degradation	HESO1_ARATH RecName: Full=Protein HESO1 {ECO:0000303|PubMed:22464194}; EC=2.7.7.52 {ECO:0000269|PubMed:22464194}; AltName: Full=HEN1 suppressor 1 {ECO:0000303|PubMed:22464194}; AltName: Full=RNA uridylyltransferase {ECO:0000305};
Cluster-9747.3	33.87	34.86	25.77	0	0	0.17	-9.34218	1.24422e-14	--	--
Cluster-18200.7	3.15	3.95	4.41	0	0	0	-10.6307	1.30355e-14	ko04075: Plant hormone signal transduction	SCL14_ARATH RecName: Full=Scarecrow-like protein 14; Short=AtSCL14; AltName: Full=GRAS family protein 2; Short=AtGRAS-2;
Cluster-23621.10	7.06	6.29	4.34	0	0	0	-10.7694	1.3191e-14	--	CAF1G_ARATH RecName: Full=Probable CCR4-associated factor 1 homolog 7; EC=3.1.13.4;
Cluster-1009.2	0	0.05	0.15	9.41	18.6	13.94	7.78584	1.32246e-14	--	--
Cluster-23019.5	68.46	6.01	67.26	0	0	0	-13.2349	1.32246e-14	--	GATA8_ARATH RecName: Full=GATA transcription factor 8;
Cluster-28487.4	431.64	1013.16	984.49	35.45	39.93	56.05	-4.10734	1.32803e-14	--	ADS3_ARATH RecName: Full=Palmitoyl-monogalactosyldiacylglycerol delta-7 desaturase, chloroplastic {ECO:0000303|PubMed:15579662}; EC=1.14.19.42 {ECO:0000269|PubMed:15579662}; AltName: Full=Acyl-lipid desaturase 3 {ECO:0000303|PubMed:15240892}; AltName: Full=Fatty acid desaturase 5 {ECO:0000303|PubMed:15579662}; Short=FAD5 {ECO:0000303|PubMed:15579662}; AltName: Full=Fatty acid desaturase B {ECO:00…
Cluster-24310.1	2.37	2.88	2.78	0	0	0	-10.5819	1.32857e-14	--	RH57_ORYSJ RecName: Full=DEAD-box ATP-dependent RNA helicase 57; EC=3.6.4.13;
Cluster-11097.0	5.27	9.25	4.3	0.04	0.09	0.09	-6.50239	1.4178e-14	--	--
Cluster-17629.4	3.36	3.58	2.81	0	0	0	-10.6027	1.4564e-14	--	PP133_ARATH RecName: Full=Pentatricopeptide repeat-containing protein At1g79540;
Cluster-20893.0	31.55	73.7	32.25	0	0	0	-11.6249	1.47512e-14	--	--
Cluster-26977.2	22.32	19.98	21.57	8.04	6.93	7.18	-1.39591	1.52286e-14	ko03040: Spliceosome	SR34A_ARATH RecName: Full=Serine/arginine-rich splicing factor SR34A; Short=At-SR34A; Short=At-SRp34A; Short=AtSR34A; AltName: Full=SER/ARG-rich protein 34A;
Cluster-23865.9	0.15	0.21	0.17	1.83	2.77	2.56	3.91751	1.52763e-14	ko04075: Plant hormone signal transduction	CXE15_ARATH RecName: Full=Probable carboxylesterase 15; AltName: Full=AtCXE15; EC=3.1.1.1;
Cluster-26023.3	4.83	15.88	15.97	0	0	0	-11.8676	1.57165e-14	ko00970: Aminoacyl-tRNA biosynthesis; ko01100: Metabolic pathways	FAAH_MEDTR RecName: Full=Fatty acid amide hydrolase {ECO:0000303|PubMed:16624618}; EC=3.5.1.- {ECO:0000269|PubMed:16624618}; AltName: Full=N-acylethanolamine amidohydrolase {ECO:0000303|PubMed:16624618};
Cluster-15564.0	144.66	125.48	126.94	10.2	10.3	3.73	-3.9041	1.61526e-14	--	--
Cluster-25733.0	41.83	37.55	46.11	99.52	92.19	84.93	1.27527	1.61526e-14	--	CINV2_ARATH RecName: Full=Alkaline/neutral invertase CINV2 {ECO:0000305}; EC=3.2.1.26 {ECO:0000269|PubMed:19470642}; AltName: Full=Alkaline/neutral invertase I {ECO:0000305}; Short=A/N-INVI {ECO:0000303|PubMed:21441406}; AltName: Full=Cytosolic invertase 2 {ECO:0000303|PubMed:19470642};
Cluster-26798.0	17.71	12.47	17.62	46.66	41.05	49.28	1.61308	1.61909e-14	--	ULT1_ARATH RecName: Full=Protein ULTRAPETALA 1 {ECO:0000303|PubMed:15673576};
Cluster-34838.2	413.5	325.02	352.57	1389.77	1071.74	1629.74	2.037	1.65267e-14	ko00270: Cysteine and methionine metabolism; ko00999: Biosynthesis of various plant secondary metabolites; ko01100: Metabolic pathways; ko01110: Biosynthesis of secondary metabolites; ko01230: Biosynthesis of amino acids; ko01240: Biosynthesis of cofactors	METK2_CATRO RecName: Full=S-adenosylmethionine synthase 2; Short=AdoMet synthase 2; EC=2.5.1.6 {ECO:0000269|PubMed:9037140}; AltName: Full=Methionine adenosyltransferase 2; Short=MAT 2;
Cluster-1591.6	50.05	35.64	59.67	184.01	143.79	184.71	2.04693	1.68768e-14	--	NAC53_ARATH RecName: Full=NAC domain-containing protein 53 {ECO:0000303|PubMed:15029955}; Short=ANAC053 {ECO:0000303|PubMed:15029955}; AltName: Full=Protein ANTHER INDEHISCENCE FACTOR {ECO:0000303|PubMed:24323506}; AltName: Full=Protein NTM1-like 4 {ECO:0000303|PubMed:17158162};
Cluster-20965.3	21.38	34.1	22.16	0	0	0	-10.9445	1.7169e-14	ko00071: Fatty acid degradation; ko00410: beta-Alanine metabolism; ko00592: alpha-Linolenic acid metabolism; ko00640: Propanoate metabolism; ko01040: Biosynthesis of unsaturated fatty acids; ko01100: Metabolic pathways; ko01110: Biosynthesis of secondary metabolites; ko01200: Carbon metabolism; ko01212: Fatty acid metabolism; ko04146: Peroxisome	ACOX4_ARATH RecName: Full=Acyl-coenzyme A oxidase 4, peroxisomal {ECO:0000305}; Short=AOX 4 {ECO:0000305}; EC=1.3.3.6 {ECO:0000269|PubMed:10212254}; AltName: Full=G6p {ECO:0000312|EMBL:AAB18129.1}; AltName: Full=Short-chain acyl-CoA oxidase {ECO:0000303|PubMed:10212254}; Short=AtCX4 {ECO:0000303|PubMed:12682048}; Short=AtG6 {ECO:0000312|EMBL:AAB18129.1}; Short=SAOX {ECO:0000305};
Cluster-29199.4	346.68	111.41	374.91	0.32	0	0	-11.1185	1.72362e-14	--	--
Cluster-16153.3	1.53	2.63	1.87	0	0	0	-10.9741	1.76408e-14	ko00230: Purine metabolism; ko01100: Metabolic pathways; ko01232: Nucleotide metabolism	POLX_TOBAC RecName: Full=Retrovirus-related Pol polyprotein from transposon TNT 1-94; Includes: RecName: Full=Protease; EC=3.4.23.-; Includes: RecName: Full=Reverse transcriptase; EC=2.7.7.49; Includes: RecName: Full=Endonuclease;
Cluster-6764.0	61.17	15.62	39.21	0	0	0	-11.4822	1.82607e-14	--	NRX1_ARATH RecName: Full=Probable nucleoredoxin 1; Short=AtNrx1; EC=1.8.1.8;
Cluster-30031.2	2.62	4.22	4.71	31.97	25.78	29.26	2.97582	1.91752e-14	--	--
Cluster-22458.10	58.78	46.34	40.81	223.4	363.65	534.69	3.39799	1.93065e-14	ko00920: Sulfur metabolism; ko01100: Metabolic pathways	APR3_ARATH RecName: Full=5'-adenylylsulfate reductase 3, chloroplastic; EC=1.8.4.9; AltName: Full=3'-phosphoadenosine-5'-phosphosulfate reductase homolog 26; Short=PAPS reductase homolog 26; Short=Prh-26; AltName: Full=Adenosine 5'-phosphosulfate 5'-adenylylsulfate sulfotransferase 3; Short=APS sulfotransferase 3; AltName: Full=Thioredoxin-independent APS reductase 3; Flags: Precursor;
Cluster-33850.5	55.6	7.77	24.7	0	0	0	-12.3361	2.00878e-14	ko00592: alpha-Linolenic acid metabolism; ko01100: Metabolic pathways; ko01110: Biosynthesis of secondary metabolites	AOC_ORYSI RecName: Full=Allene oxide cyclase, chloroplastic {ECO:0000303|Ref.1}; Short=OsAOC {ECO:0000305}; EC=5.3.99.6 {ECO:0000250|UniProtKB:Q75KD7}; Flags: Precursor;
Cluster-12577.10	7.2	7.08	12.95	0	0	0	-10.7733	2.08335e-14	ko03050: Proteasome	PSA6_TOBAC RecName: Full=Proteasome subunit alpha type-6; AltName: Full=20S proteasome alpha subunit A; AltName: Full=20S proteasome subunit alpha-1;
Cluster-27308.8	89.52	129.32	41.28	0	0	0.14	-10.8711	2.09499e-14	--	SAP4_ARATH RecName: Full=Zinc finger A20 and AN1 domain-containing stress-associated protein 4; Short=AtSAP4;
Cluster-14866.1	4.14	7.8	8.2	0	0	0	-11.053	2.09572e-14	ko03015: mRNA surveillance pathway	DEX1_ARATH RecName: Full=Protein DEFECTIVE IN EXINE FORMATION 1 {ECO:0000303|PubMed:11743117}; Flags: Precursor;
Cluster-21134.6	34.47	31.31	29.59	7.33	6.72	4.84	-2.20801	2.10516e-14	ko03020: RNA polymerase	NRPE1_ARATH RecName: Full=DNA-directed RNA polymerase V subunit 1; AltName: Full=DNA-directed RNA polymerase D subunit 1b; Short=AtNRPD1b; Short=Nuclear RNA polymerase D 1b; AltName: Full=DNA-directed RNA polymerase E subunit 1; Short=Nuclear RNA polymerase E 1; EC=2.7.7.6; AltName: Full=Protein DEFECTIVE IN MERISTEM SILENCING 5; AltName: Full=Protein DEFECTIVE IN RNA-DIRECTED DNA METHYLATION 3; …
Cluster-28379.1	0.93	0.91	1.66	25.15	10.95	33.06	4.45532	2.11119e-14	ko00940: Phenylpropanoid biosynthesis; ko01100: Metabolic pathways; ko01110: Biosynthesis of secondary metabolites	CCR1_PETHY RecName: Full=Cinnamoyl-CoA reductase 1 {ECO:0000303|PubMed:24985707, ECO:0000303|PubMed:25217505}; Short=PhCCR1 {ECO:0000303|PubMed:24985707, ECO:0000303|PubMed:25217505}; EC=1.2.1.44 {ECO:0000250|UniProtKB:Q9S9N9}; AltName: Full=Coniferylaldehyde synthase {ECO:0000305}; EC=1.2.1.- {ECO:0000269|PubMed:24985707, ECO:0000269|PubMed:25217505};
Cluster-29252.1	41.64	237.87	82.84	0	0	0.14	-11.4179	2.1329e-14	--	RICI_RICCO RecName: Full=Ricin; Contains: RecName: Full=Ricin A chain; EC=3.2.2.22; AltName: Full=rRNA N-glycosidase; Contains: RecName: Full=Ricin B chain; Flags: Precursor;
Cluster-29395.0	15.68	19.73	20.39	2.08	2.31	3.3	-2.80776	2.17408e-14	--	--
Cluster-17333.0	23.6	12.71	32.36	182.13	351.13	283.29	3.74019	2.20616e-14	--	PROF1_SOLLC RecName: Full=Profilin-1;
Cluster-28664.1	9.51	10.4	2.92	0	0	0	-11.8505	2.25499e-14	--	AT18F_ARATH RecName: Full=Autophagy-related protein 18f; Short=AtATG18f;
Cluster-31140.4	42.58	22.68	17.76	0.18	0	0	-8.60121	2.25705e-14	--	--
Cluster-29919.0	3.38	0.58	7.95	282.25	438.74	446.35	6.82959	2.36202e-14	--	--
Cluster-17468.3	28.61	23.49	48.33	4.66	3.78	3.75	-2.89402	2.39171e-14	--	--
Cluster-27066.6	3.97	11.86	5.1	0	0	0	-11.8115	2.84414e-14	ko00010: Glycolysis / Gluconeogenesis; ko00020: Citrate cycle (TCA cycle); ko00620: Pyruvate metabolism; ko01100: Metabolic pathways; ko01110: Biosynthesis of secondary metabolites; ko01200: Carbon metabolism	ODP24_ARATH RecName: Full=Dihydrolipoyllysine-residue acetyltransferase component 4 of pyruvate dehydrogenase complex, chloroplastic; EC=2.3.1.12; AltName: Full=Dihydrolipoamide S-acetyltransferase component 4 of pyruvate dehydrogenase complex; AltName: Full=Pyruvate dehydrogenase complex component E2 4; Short=PDC-E2 4; Short=PDCE2 4; Short=plE2; Flags: Precursor;
Cluster-26813.5	3.6	4.78	4.78	0.64	0.4	0.46	-3.00808	2.84781e-14	--	PPAF2_IPOBA RecName: Full=Purple acid phosphatase 2; EC=3.1.3.2; AltName: Full=Manganese(II) purple acid phosphatase 2; Flags: Precursor;
Cluster-25263.0	38.09	29.52	40.78	91.86	106.99	116.76	1.67466	2.89438e-14	ko00520: Amino sugar and nucleotide sugar metabolism	NB5R1_ARATH RecName: Full=NADH--cytochrome b5 reductase 1; EC=1.6.2.2;
Cluster-31733.1	50.99	72.54	21.73	0	0	0	-11.6966	2.98939e-14	--	--
Cluster-22093.0	0.11	0	0	8.37	7.92	6.86	7.96643	3.01479e-14	--	--
Cluster-25625.0	27.06	14.74	7.67	0	0	0	-11.4969	3.07097e-14	ko00350: Tyrosine metabolism; ko01100: Metabolic pathways	FAH_ARATH RecName: Full=Fumarylacetoacetase {ECO:0000305}; EC=3.7.1.2 {ECO:0000269|PubMed:22980205}; AltName: Full=Fumarylacetoacetate hydrolase {ECO:0000303|PubMed:22980205}; Short=AtFAH {ECO:0000303|PubMed:22980205}; AltName: Full=Protein SHORT-DAY SENSITIVE CELL DEATH 1 {ECO:0000303|PubMed:23743712};
Cluster-1813.6	4.83	13.86	7.86	0	0	0	-11.5797	3.09711e-14	--	--
Cluster-29729.0	1531.21	1909.84	1962.5	10.94	61.22	20.19	-5.74008	3.09711e-14	ko04141: Protein processing in endoplasmic reticulum	HS23C_OXYRB RecName: Full=Small heat shock protein, chloroplastic; Flags: Precursor;
[truncated: 11,058 more rows]

## Sheet: Table S6
Table S6: The differentially expressed genes (DEGs) in the P. vulgaris and P. vulgaris chimera.
[truncated: 8,707 more rows]

## Sheet: Table S7
Table S7: 9411 Santalum homologous genes.
[truncated: 9,412 more rows]

[truncated: 2 more sheets: Table S8, Table S9]
